# Supplementary material for: Defluorinative [4 + 1] annulation of perfluoroalkyl N-mesylhydrazones with primary amines provides 5-fluoroalkyl 1,2,3-triazoles
Source: Royal Society of Chemistry journal article supplement (doi:10.1039/d1gc02749b), 2021-01-01
Supplement: d1gc02749b1.pdf [file d1gc02749b1.pdf]

*Supporting Information for*

**Defluorinative [4 + 1] Annulation of Perfluoroalkyl *N*-Mesylhydrazones with Primary Amines Provides 5-Fluoroalkyl 1,2,3-Triazoles**

Yongquan Ning<sup>†a</sup>, Hongwei Wang<sup>†a</sup>, Paramasivam Sivaguru<sup>†a</sup>, Shuang Li,<sup>a</sup> Giuseppe Zanoni,<sup>b</sup> Steven P. Nolan,<sup>c</sup> and Xihe Bi<sup>\*a,d</sup>

<sup>a</sup> Department of Chemistry, Northeast Normal University, Changchun 130024, China. <sup>b</sup>

Department of Chemistry, University of Pavia, Viale Taramelli 12, 27100 Pavia, Italy. <sup>c</sup>

Department of Chemistry and Sustainable Chemistry, Ghent University, 281 Krijgslaan S-3, 9000,

Ghent Belgium. <sup>d</sup> State Key Laboratory of Elemento-Organic Chemistry, Nankai University, Tianjin 300071, China.

E-mail: [bixh507@nenu.edu.cn](mailto:bixh507@nenu.edu.cn)

**Contents**

|                                                                                               |     |
|-----------------------------------------------------------------------------------------------|-----|
| I. General information.....                                                                   | 2   |
| II. General procedures for the synthesis of perfluoroalkyl <i>N</i> -sulfonylhydrazones ..... | 2   |
| III. General procedures for synthesis of 5-fluoroalkyl 1,2,3-triazoles.....                   | 2   |
| IV. Characterization data of prepared compounds .....                                         | 3   |
| V. X-ray single crystal data of 68 and 77 .....                                               | 27  |
| VI. Copies of NMR spectra .....                                                               | 29  |
| VII. Computational details.....                                                               | 147 |

## I. General information

All reagents were purchased from commercial sources and used without purification unless otherwise mentioned. The products were purified by column chromatography over silica gel (300-400). NMR spectra were recorded on a Bruker Advance 600 ( $^1\text{H}$ : 600 MHz,  $^{13}\text{C}$ : 150 MHz) and Bruker Advance 500 ( $^1\text{H}$ : 500 MHz,  $^{13}\text{C}$ : 125 MHz,  $^{19}\text{F}$ : 471 MHz) at ambient temperature. Data were reported as chemical shifts in ppm relative to TMS (0.00 ppm) for  $^1\text{H}$  and  $\text{CDCl}_3$  (77.0 ppm) for  $^{13}\text{C}$ . The following abbreviations were used to explain the multiplicities: s = singlet, d = doublet, t = triplet, q = quartet, m = multiplet, br = broad. Mass spectra were recorded on BRUKER AutoflexIII Smartbeam MS-spectrometer. High-resolution mass spectra (HRMS) were recorded on Bruker microTof by using ESI method.

## II. General procedures for the synthesis of perfluoroalkyl *N*-sulfonylhydrazones

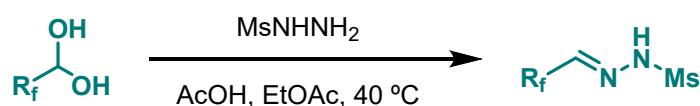

A 250 mL bottom flask was charged with pentafluoropropionaldehyde hydrate (75.0 mmol), methanesulfonylhydrazide ( $\text{MsNHNH}_2$ ) (50.0 mmol) and ethyl acetate (200.0 mL). Then acetic acid (5.5 mmol) was added dropwise under  $\text{N}_2$  atmosphere and the mixture was stirred at 40 °C for 4-5 h. The progress of the reaction was monitored by TLC (PE:EA = 5:1 to 4:1). After completion, the reaction mixture was concentrated under reduced pressure and the obtained crude solid was purified by column chromatography using PE/EA (5:1 to 4:1) as eluent to afford the product **1a** as a white solid. The same procedure was followed for the preparation other pentafluoroalkyl *N*-sulfonylhydrazones **1b-1f** using corresponding *p*-toluenesulfonyl hydrazide ( $\text{TsNHNH}_2$ ) and 2-(trifluoromethyl)benzenesulfonylhydrazide ( $\text{TfsNHNH}_2$ )<sup>[1]</sup>

## III. General procedures for synthesis of 5-fluoroalkyl 1,2,3-triazoles (with **2** as an example):

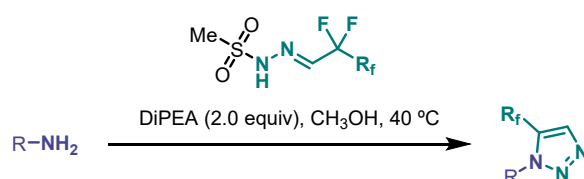

In a 15 mL of Schlenk tube equipped with Teflon coated magnetic stirring bar, perfluoroalkyl *N*-

sulfonylhydrazone (**1**, 0.30 mmol, 1.0 equiv) in CH<sub>3</sub>OH (2 mL) was charged under air, then amine (0.60 mmol, 2.0 equiv) and DiPEA (0.60 mmol, 2 equiv) were added in one portion and the reaction was allowed to stirred at 40 °C until the complete consumption of **1** as evidenced by TLC. After completion, water was added to the mixture and was extracted with EtOAc (3x5 mL). The combined organic layer was dried with anhydrous MgSO<sub>4</sub>, filtered, and evaporated under reduced pressure to give the crude mixture, which was purified by flash column chromatography to afford the pure 5-fluoroalkyl 1,2,3-triazole products.

#### IV. General procedures for scale experiments of **6** and **52**.

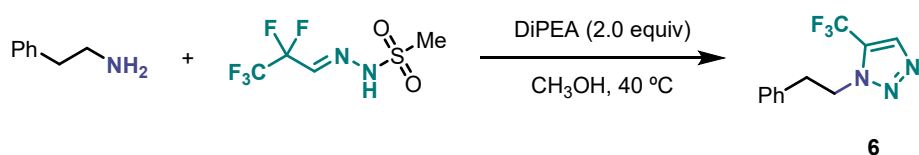

In a 50 mL of Schlenk tube equipped with Teflon coated magnetic stirring bar, perfluoroalkyl *N*-sulfonylhydrazone (**1a**, 10 mmol, 1.0 equiv) in CH<sub>3</sub>OH (15 mL) was charged under air, then amine (20 mmol, 2.0 equiv) and DiPEA (20 mmol, 2 equiv) were added in one portion and the reaction was allowed to stirred at 40 °C until the complete consumption of **1a** as evidenced by TLC. After completion, water was added to the mixture and was extracted with EtOAc (3x15 mL). The combined organic layer was dried with anhydrous MgSO<sub>4</sub>, filtered, and evaporated under reduced pressure to give the crude mixture, which was purified by flash column chromatography to afford the pure 5-CF<sub>3</sub> 1,2,3-triazole products in 82% yield.

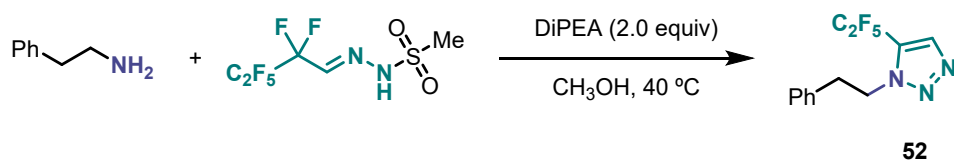

In a 50 mL of Schlenk tube equipped with Teflon coated magnetic stirring bar, perfluoroalkyl *N*-sulfonylhydrazone (**1d**, 10 mmol, 1.0 equiv) in CH<sub>3</sub>OH (15 mL) was charged under air, then amine (20 mmol, 2.0 equiv) and DiPEA (20 mmol, 2 equiv) were added in one portion and the reaction was allowed to stirred at 40 °C until the complete consumption of **1d** as evidenced by TLC. After completion, water was added to the mixture and was extracted with EtOAc (3x15 mL). The combined organic layer was dried with anhydrous MgSO<sub>4</sub>, filtered, and evaporated under



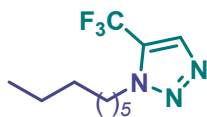

(2) Colorless oil. **<sup>1</sup>H NMR** (600 MHz, CDCl<sub>3</sub>) δ 7.96 (s, 1H), 4.45 (t, *J* = 7.2 Hz, 2H), 2.00-1.94 (m, 2H), 1.40-1.32 (m, 4H), 1.31-1.22 (m, 6H), 0.88 (t, *J* = 7.2 Hz, 3H). **<sup>13</sup>C NMR** (150 MHz, CDCl<sub>3</sub>) δ 134.1, 127.6 (q, *J* = 42.0 Hz), 120.0 (q, *J* = 265.5 Hz), 50.1, 31.6, 30.0, 29.0, 28.8, 26.4, 22.6, 14.0. **<sup>19</sup>F NMR** (471 MHz, CDCl<sub>3</sub>) δ -59.15 (s). **HRMS** (ESI) *m/z* calcd. for C<sub>11</sub>H<sub>18</sub>F<sub>3</sub>N<sub>3</sub>Na [M+Na]<sup>+</sup> 272.1345, found 272.1345.

---

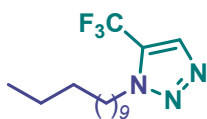

(3) Colorless oil. **<sup>1</sup>H NMR** (600 MHz, CDCl<sub>3</sub>) δ 7.96 (s, 1H), 4.45 (t, *J* = 7.2 Hz, 2H), 2.02-1.93 (m, 2H), 1.42-1.21 (m, 18H), 0.88 (t, *J* = 7.2 Hz, 3H). **<sup>13</sup>C NMR** (150 MHz, CDCl<sub>3</sub>) δ 134.1, 127.6 (q, *J* = 40.5 Hz), 120.0 (q, *J* = 265.5 Hz), 50.1, 31.9, 29.9, 29.5, 29.4, 29.3, 28.9, 26.4, 22.6, 14.0. **<sup>19</sup>F NMR** (471 MHz, CDCl<sub>3</sub>) δ -59.18 (s). **HRMS** (ESI) *m/z* calcd. for C<sub>15</sub>H<sub>26</sub>F<sub>3</sub>N<sub>3</sub>Na [M+Na]<sup>+</sup> 328.1971, found 328.1978.

---

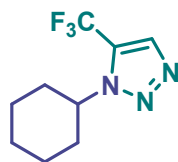

(4) Yellow oil. **<sup>1</sup>H NMR** (600 MHz, CDCl<sub>3</sub>) δ 7.92 (s, 1H), 4.38-4.31 (m, 1H), 2.13-2.07 (m, 4H), 2.00-1.94 (m, 2H), 1.80-1.74 (m, 1H), 1.48-1.39 (m, 2H), 1.38-1.32 (m, 1H). **<sup>13</sup>C NMR** (150 MHz, CDCl<sub>3</sub>) δ 133.5, 127.1 (q, *J* = 40.5 Hz), 120.1 (q, *J* = 267.0 Hz), 60.7, 33.3, 25.4, 24.9. **<sup>19</sup>F NMR** (471 MHz, CDCl<sub>3</sub>) δ -59.17 (s). **HRMS** (ESI) *m/z* calcd. for C<sub>9</sub>H<sub>12</sub>F<sub>3</sub>N<sub>3</sub> [M+H]<sup>+</sup> 220.1070, found 220.1062.

---

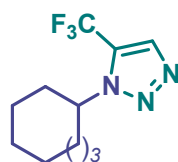

(5) Yellow oil; **<sup>1</sup>H NMR** (600 MHz, CDCl<sub>3</sub>) δ 7.89 (s, 1H), 4.67-4.62 (m, 1H), 2.35-2.29 (m, 2H), 2.03-1.97 (m, 2H), 1.91-1.84 (m, 2H), 1.68-1.58 (m, 8H). **<sup>13</sup>C NMR** (150 MHz, CDCl<sub>3</sub>) δ 133.4,

126.6 (q,  $J = 40.5$  Hz), 120.1 (q,  $J = 267.0$  Hz), 61.6, 33.3, 26.5, 25.9, 24.2.  $^{19}\text{F}$  NMR (471 MHz,  $\text{CDCl}_3$ )  $\delta$  -59.07 (s). HRMS (ESI)  $m/z$  calcd. for  $\text{C}_{11}\text{H}_{18}\text{F}_3\text{N}_3[\text{M}+\text{H}]^+$  248.2732, found 248.2735.

---

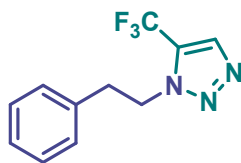

(6) Colorless oil;  $^1\text{H}$  NMR (600 MHz,  $\text{CDCl}_3$ )  $\delta$  7.95 (q,  $J = 0.6$  Hz, 1H), 7.33-7.29 (m, 2H), 7.28-7.25 (m, 1H), 7.18-7.15 (m, 2H), 4.68-4.64 (m, 2H), 3.29-3.26 (m, 2H).  $^{13}\text{C}$  NMR (150 MHz,  $\text{CDCl}_3$ )  $\delta$  136.2, 134.1 (q,  $J = 3.0$  Hz), 128.9, 128.7, 127.8 (q,  $J = 42.0$  Hz), 127.3, 119.9 (q,  $J = 267.0$  Hz), 51.2, 36.5.  $^{19}\text{F}$  NMR (471 MHz,  $\text{CDCl}_3$ )  $\delta$  -59.09 (s). HRMS (ESI)  $m/z$  calcd. for  $\text{C}_{11}\text{H}_{10}\text{F}_3\text{N}_3\text{Na} [\text{M}+\text{Na}]^+$  264.0719, found 264.0716.

---

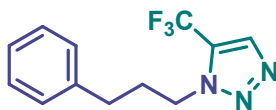

(7) Colorless oil;  $^1\text{H}$  NMR (600 MHz,  $\text{CDCl}_3$ )  $\delta$  7.97 (s, 1H), 7.31 (t,  $J = 7.2$  Hz, 2H), 7.24-7.18 (m, 3H), 4.47 (t,  $J = 7.8$  Hz, 2H), 2.72 (t,  $J = 7.2$  Hz, 2H), 2.34-2.28 (m, 2H).  $^{13}\text{C}$  NMR (150 MHz,  $\text{CDCl}_3$ )  $\delta$  139.8, 134.2 (q,  $J = 1.5$  Hz), 128.6, 128.3, 127.7 (q,  $J = 42.0$  Hz), 126.4, 119.9 (q,  $J = 267.0$  Hz), 49.4, 32.5, 31.3.  $^{19}\text{F}$  NMR (471 MHz,  $\text{CDCl}_3$ )  $\delta$  -59.14 (s). HRMS (ESI)  $m/z$  calcd. for  $\text{C}_{12}\text{H}_{12}\text{F}_3\text{N}_3\text{Na} [\text{M}+\text{Na}]^+$  278.0876, found 278.0874.

---

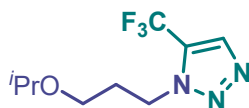

(8) White solid; mp: 57-58 °C;  $^1\text{H}$  NMR (600 MHz,  $\text{CDCl}_3$ )  $\delta$  7.94 (s, 1H), 4.56 (t,  $J = 7.2$  Hz, 2H), 3.55-3.50 (m, 1H), 3.45 (t,  $J = 5.4$  Hz, 2H), 2.23-2.18 (m, 2H), 1.11 (d,  $J = 6.6$  Hz, 6H).  $^{13}\text{C}$  NMR (150 MHz,  $\text{CDCl}_3$ )  $\delta$  134.1, 127.8 (q,  $J = 40.5$  Hz), 119.9 (q,  $J = 265.5$  Hz), 71.7, 64.0, 47.4, 30.3, 21.9.  $^{19}\text{F}$  NMR (471 MHz,  $\text{CDCl}_3$ )  $\delta$  -59.23 (s). HRMS (ESI)  $m/z$  calcd. for  $\text{C}_9\text{H}_{14}\text{F}_3\text{N}_3\text{ONa} [\text{M}+\text{Na}]^+$  260.0981, found 260.0976.

---

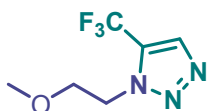

(9) Colorless oil;  $^1\text{H NMR}$  (500 MHz,  $\text{CDCl}_3$ )  $\delta$  7.97 (s, 1H), 4.63 (t,  $J = 5.5$  Hz, 2H), 3.88 (t,  $J = 5.5$  Hz, 2H), 3.34 (s, 3H).  $^{13}\text{C NMR}$  (125 MHz,  $\text{CDCl}_3$ )  $\delta$  134.2, 128.3 (q,  $J = 41.6$  Hz), 119.8 (q,  $J = 268.4$  Hz), 69.9, 59.0, 49.5.  $^{19}\text{F NMR}$  (471 MHz,  $\text{CDCl}_3$ )  $\delta$  -58.77 (s). **HRMS** (ESI)  $m/z$  calcd. for  $\text{C}_6\text{H}_9\text{F}_3\text{N}_3\text{O}$   $[\text{M}+\text{H}]^+$  196.0692, found 196.0698.

---

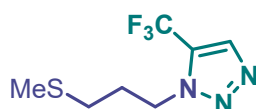

(10) Colorless oil;  $^1\text{H NMR}$  (600 MHz,  $\text{CDCl}_3$ )  $\delta$  7.96 (s, 1H), 4.58 (t,  $J = 7.2$  Hz, 2H), 2.57 (t,  $J = 7.2$  Hz, 2H), 2.28-2.23 (m, 2H), 2.10 (s, 3H).  $^{13}\text{C NMR}$  (150 MHz,  $\text{CDCl}_3$ )  $\delta$  134.2, 127.8 (q,  $J = 40.5$  Hz), 119.9 (q,  $J = 265.5$  Hz), 48.6, 30.7, 28.8, 15.2.  $^{19}\text{F NMR}$  (471 MHz,  $\text{CDCl}_3$ )  $\delta$  -59.16 (s). **HRMS** (ESI)  $m/z$  calcd. for  $\text{C}_7\text{H}_{10}\text{F}_3\text{N}_3\text{SNa}$   $[\text{M}+\text{Na}]^+$  248.2226, found 248.2230.

---

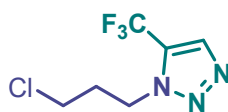

(11) Colorless oil;  $^1\text{H NMR}$  (600 MHz,  $\text{CDCl}_3$ )  $\delta$  7.99 (s, 1H), 4.66 (t,  $J = 7.2$  Hz, 2H), 3.64 (t,  $J = 6.0$  Hz, 2H), 2.51-2.44 (m, 2H).  $^{13}\text{C NMR}$  (150 MHz,  $\text{CDCl}_3$ )  $\delta$  134.3, 128.0 (q,  $J = 40.5$  Hz), 119.8 (q,  $J = 267.0$  Hz), 47.1, 40.9, 32.3.  $^{19}\text{F NMR}$  (471 MHz,  $\text{CDCl}_3$ )  $\delta$  -59.18 (s). **HRMS** (ESI)  $m/z$  calcd. for  $\text{C}_6\text{H}_8\text{ClF}_3\text{N}_3$   $[\text{M}+\text{H}]^+$  214.0359, found 214.0359.

---

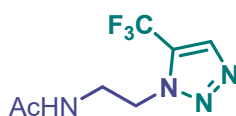

(12) Colorless oil.  $^1\text{H NMR}$  (600 MHz,  $\text{CDCl}_3$ )  $\delta$  7.98 (s, 1H), 6.30 (s, 1H), 4.59 (t,  $J = 4.8$  Hz, 2H), 3.90-3.85 (m, 2H), 1.98 (s, 3H).  $^{13}\text{C NMR}$  (150 MHz,  $\text{CDCl}_3$ )  $\delta$  170.7, 134.2, 128.5 (q,  $J = 40.5$  Hz), 119.7 (q,  $J = 267.0$  Hz), 49.5, 38.7, 22.9.  $^{19}\text{F NMR}$  (471 MHz,  $\text{CDCl}_3$ )  $\delta$  -59.12 (s). **HRMS** (ESI)  $m/z$  calcd. for  $\text{C}_7\text{H}_9\text{F}_3\text{N}_4\text{ONa}$   $[\text{M}+\text{Na}]^+$  245.0621, found 245.0625.

---

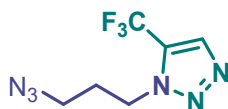

(13) Colorless oil. **<sup>1</sup>H NMR** (600 MHz, CDCl<sub>3</sub>) δ 7.99 (s, 1H), 4.57 (t, *J* = 6.6 Hz, 2H), 3.46 (t, *J* = 6.6 Hz, 2H), 2.27-2.21 (m, 2H). **<sup>13</sup>C NMR** (150 MHz, CDCl<sub>3</sub>) δ 134.3, 127.9 (q, *J* = 42.0 Hz), 119.9 (q, *J* = 267.0 Hz), 48.1, 47.1, 29.1. **<sup>19</sup>F NMR** (471 MHz, CDCl<sub>3</sub>) δ -59.19 (s). **HRMS** (ESI) *m/z* calcd. for C<sub>6</sub>H<sub>8</sub>F<sub>3</sub>N<sub>6</sub> [M+H]<sup>+</sup> 221.0767, found 221.0763.

---

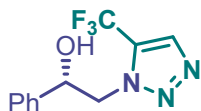

(14) Colorless oil; **<sup>1</sup>H NMR** (600 MHz, CDCl<sub>3</sub>) δ 7.96 (s, 1H), 7.44-7.39 (m, 4H), 7.38-7.33 (m, 1H), 5.40-5.32 (m, 1H), 4.64-4.55 (m, 2H), 3.30 (d, *J* = 3.0 Hz, 1H). **<sup>13</sup>C NMR** (150 MHz, CDCl<sub>3</sub>) δ 139.5, 134.0, 128.9, 128.7, 128.6 (q, *J* = 40.5 Hz), 125.8, 119.7 (q, *J* = 267.0 Hz), 72.4, 56.8. **<sup>19</sup>F NMR** (471 MHz, CDCl<sub>3</sub>) δ -58.62 (s). **HRMS** (ESI) *m/z* calcd. for C<sub>11</sub>H<sub>10</sub>F<sub>3</sub>N<sub>3</sub>ONa [M+Na]<sup>+</sup> 280.0668, found 280.0675.

---

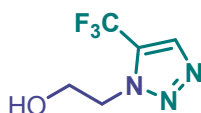

(15) Colorless oil; **<sup>1</sup>H NMR** (600 MHz, CDCl<sub>3</sub>) δ 7.96 (s, 1H), 4.59 (t, *J* = 5.4 Hz, 2H), 4.18 (t, *J* = 5.4 Hz, 2H), 3.30 (s, 1H). **<sup>13</sup>C NMR** (150 MHz, CDCl<sub>3</sub>) δ 134.1, 128.5 (q, *J* = 42.0 Hz), 119.7 (q, *J* = 267.0 Hz), 60.3, 52.2. **<sup>19</sup>F NMR** (471 MHz, CDCl<sub>3</sub>) δ -59.03 (s). **HRMS** (ESI) *m/z* calcd. for C<sub>5</sub>H<sub>6</sub>F<sub>3</sub>N<sub>3</sub>ONa [M+Na]<sup>+</sup> 204.0355, found 204.0364.

---

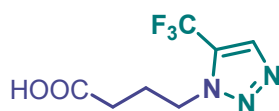

(16) White solid; mp: 66-67 °C; **<sup>1</sup>H NMR** (600 MHz, CDCl<sub>3</sub>) δ 8.00 (s, 1H), 4.59 (t, *J* = 7.2 Hz, 2H), 2.50 (t, *J* = 7.2 Hz, 2H), 2.35-2.28 (m, 2H). **<sup>13</sup>C NMR** (150 MHz, CDCl<sub>3</sub>) δ 177.3, 134.2, 127.9 (q, *J* = 40.5 Hz), 119.8 (q, *J* = 267.0 Hz), 48.9, 30.3, 24.6. **<sup>19</sup>F NMR** (471 MHz, CDCl<sub>3</sub>) δ -59.24 (s). **HRMS** (ESI) *m/z* calcd. for C<sub>7</sub>H<sub>8</sub>F<sub>3</sub>N<sub>3</sub>O<sub>2</sub>Na [M+Na]<sup>+</sup> 246.0461, found 246.0453.

---

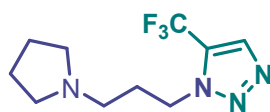

(17) Yellow oil; **<sup>1</sup>H NMR** (600 MHz, CDCl<sub>3</sub>) δ 7.96 (s, 1H), 4.56 (t, *J* = 7.2 Hz, 2H), 2.57 (t, *J* =



7.2 Hz, 2H), 2.54-2.48 (m, 4H), 2.22-2.14 (m, 2H), 1.81-1.75 (m, 4H).  $^{13}\text{C}$  NMR (150 MHz,  $\text{CDCl}_3$ )  $\delta$  134.1, 127.7 (q,  $J = 40.5$  Hz), 119.9 (q,  $J = 267.0$  Hz), 54.0, 52.9, 48.5, 29.2, 23.5.  $^{19}\text{F}$  NMR (471 MHz,  $\text{CDCl}_3$ )  $\delta$  -59.17 (s). HRMS (ESI)  $m/z$  calcd. for  $\text{C}_{10}\text{H}_{16}\text{F}_3\text{N}_4\text{Na}$   $[\text{M}+\text{H}]^+$  249.1330, found 249.1322.

---

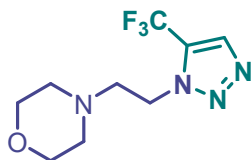

(18) Yellow oil;  $^1\text{H}$  NMR (600 MHz,  $\text{CDCl}_3$ )  $\delta$  7.97 (s, 1H), 4.58 (t,  $J = 6.6$  Hz, 2H), 3.69-3.63 (m, 4H), 2.93 (t,  $J = 6.6$  Hz, 2H), 2.54-2.49 (m, 4H).  $^{13}\text{C}$  NMR (150 MHz,  $\text{CDCl}_3$ )  $\delta$  134.1, 128.0 (q,  $J = 42.0$  Hz), 119.9 (q,  $J = 265.5$  Hz), 66.7, 57.4, 53.4, 47.2.  $^{19}\text{F}$  NMR (471 MHz,  $\text{CDCl}_3$ )  $\delta$  -58.90 (s). HRMS (ESI)  $m/z$  calcd. for  $\text{C}_9\text{H}_{13}\text{F}_3\text{N}_4\text{ONa}$   $[\text{M}+\text{Na}]^+$  251.1114, found 251.1123.

---

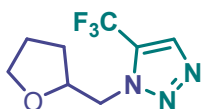

(19) Yellow oil;  $^1\text{H}$  NMR (600 MHz,  $\text{CDCl}_3$ )  $\delta$  7.98 (s, 1H), 4.55-4.47 (m, 2H), 4.47-4.39 (m, 1H), 3.91-3.86 (m, 1H), 3.81-3.77 (m, 1H), 2.14-2.05 (m, 1H), 1.98-1.87 (m, 2H), 1.80-1.74 (m, 1H).  $^{13}\text{C}$  NMR (150 MHz,  $\text{CDCl}_3$ )  $\delta$  134.1, 128.4 (q,  $J = 42.0$  Hz), 119.9 (q,  $J = 267.0$  Hz), 76.6, 68.4, 53.5, 29.2, 25.4.  $^{19}\text{F}$  NMR (471 MHz,  $\text{CDCl}_3$ )  $\delta$  -58.50 (s). HRMS (ESI)  $m/z$  calcd. for  $\text{C}_8\text{H}_{10}\text{F}_3\text{N}_3\text{ONa}$   $[\text{M}+\text{Na}]^+$  244.0668, found 244.0661.

---

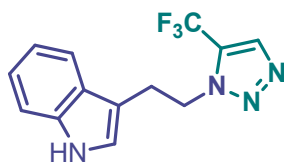

(20) White solid; mp: 84-85 °C;  $^1\text{H}$  NMR (600 MHz,  $\text{CDCl}_3$ )  $\delta$  8.16 (s, 1H), 7.97 (s, 1H), 7.58 (d,  $J = 7.8$  Hz, 1H), 7.37 (d,  $J = 7.8$  Hz, 1H), 7.22 (t,  $J = 7.2$  Hz, 1H), 7.16 (t,  $J = 7.8$  Hz, 1H), 7.01 (d,  $J = 1.8$  Hz, 1H), 4.73 (t,  $J = 7.8$  Hz, 2H), 3.44 (t,  $J = 7.8$  Hz, 2H).  $^{13}\text{C}$  NMR (150 MHz,  $\text{CDCl}_3$ )  $\delta$  136.3, 134.1, 127.8 (q,  $J = 40.5$  Hz), 126.9, 122.5, 122.4, 119.9 (q,  $J = 267.0$  Hz), 119.8, 118.1, 111.4, 110.6, 50.6, 26.5.  $^{19}\text{F}$  NMR (471 MHz,  $\text{CDCl}_3$ )  $\delta$  -59.06 (s). HRMS (ESI)  $m/z$  calcd. for  $\text{C}_{13}\text{H}_{11}\text{F}_3\text{N}_4\text{Na}$   $[\text{M}+\text{Na}]^+$  303.0828, found 303.0834.

---

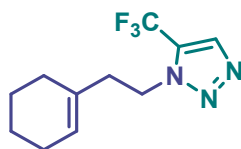

(21) Yellow oil;  $^1\text{H NMR}$  (600 MHz,  $\text{CDCl}_3$ )  $\delta$  7.95 (s, 1H), 5.43-5.40 (m, 1H), 4.53 (t,  $J = 7.8$  Hz, 2H), 2.57 (t,  $J = 7.8$  Hz, 2H), 2.02-1.92 (m, 4H), 1.67-1.61 (m, 2H), 1.58-1.50 (m, 2H).  $^{13}\text{C NMR}$  (150 MHz,  $\text{CDCl}_3$ )  $\delta$  134.0 (q,  $J = 1.5$  Hz), 132.4, 127.5 (q,  $J = 42.0$  Hz), 125.0, 119.9 (q,  $J = 267.0$  Hz), 48.8, 38.4, 27.9, 25.1, 22.6, 21.9.  $^{19}\text{F NMR}$  (471 MHz,  $\text{CDCl}_3$ )  $\delta$  -59.09 (s). **HRMS** (ESI)  $m/z$  calcd. for  $\text{C}_{11}\text{H}_{14}\text{F}_3\text{N}_3\text{Na}$   $[\text{M}+\text{Na}]^+$  268.1032, found 268.1032.

---

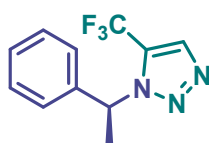

(22) Yellow oil;  $^1\text{H NMR}$  (600 MHz,  $\text{CDCl}_3$ )  $\delta$  7.97 (s, 1H), 7.37-7.29 (m, 5H), 5.75 (q,  $J = 7.2$  Hz, 1H), 2.09 (d,  $J = 7.2$  Hz, 3H).  $^{13}\text{C NMR}$  (150 MHz,  $\text{CDCl}_3$ )  $\delta$  139.3, 134.2, 128.9, 128.6, 127.5 (q,  $J = 42.0$  Hz), 126.4, 119.9 (q,  $J = 267.0$  Hz), 60.8, 22.5.  $^{19}\text{F NMR}$  (471 MHz,  $\text{CDCl}_3$ )  $\delta$  -58.67 (s). **HRMS** (ESI)  $m/z$  calcd. for  $\text{C}_{11}\text{H}_{10}\text{F}_3\text{N}_3\text{Na}$   $[\text{M}+\text{Na}]^+$  264.0719, found 264.0721.

---

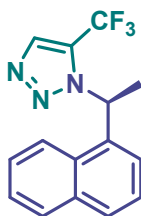

(23) Yellow oil;  $^1\text{H NMR}$  (600 MHz,  $\text{CDCl}_3$ )  $\delta$  8.03 (s, 1H), 7.99 (d,  $J = 8.4$  Hz, 1H), 7.89 (d,  $J = 8.4$  Hz, 1H), 7.81 (d,  $J = 7.8$  Hz, 1H), 7.57 (t,  $J = 7.8$  Hz, 1H), 7.51 (t,  $J = 7.8$  Hz, 1H), 7.39 (t,  $J = 7.2$  Hz, 1H), 7.18 (d,  $J = 7.2$  Hz, 1H), 6.65 (q,  $J = 7.2$  Hz, 1H), 2.20 (d,  $J = 6.6$  Hz, 3H).  $^{13}\text{C NMR}$  (150 MHz,  $\text{CDCl}_3$ )  $\delta$  135.3, 134.8 (q,  $J = 1.5$  Hz), 133.7, 129.6, 129.2, 129.1, 127.7 (q,  $J = 40.5$  Hz), 127.0, 125.9, 125.4, 123.6, 121.4, 119.8 (q,  $J = 267.0$  Hz), 57.1, 21.9.  $^{19}\text{F NMR}$  (471 MHz,  $\text{CDCl}_3$ )  $\delta$  -59.12 (s). **HRMS** (ESI)  $m/z$  calcd. for  $\text{C}_{15}\text{H}_{12}\text{F}_3\text{N}_3\text{Na}$   $[\text{M}+\text{Na}]^+$  314.0876, found 314.0870.

---

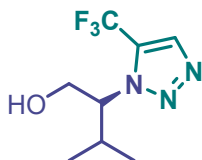

(24) Colorless oil;  $^1\text{H NMR}$  (600 MHz,  $\text{CDCl}_3$ )  $\delta$  7.88 (s, 1H), 4.33-4.22 (m, 2H), 4.09-4.02 (m, 1H), 3.15 (t,  $J = 5.4$  Hz, 1H), 2.56-2.46 (m, 1H), 1.11 (d,  $J = 6.6$  Hz, 3H), 0.74 (d,  $J = 7.2$  Hz, 3H).  $^{13}\text{C NMR}$  (150 MHz,  $\text{CDCl}_3$ )  $\delta$  133.2, 129.5 (q,  $J = 40.5$  Hz), 119.7 (q,  $J = 267.0$  Hz), 69.8, 63.0, 30.4, 19.4, 19.2.  $^{19}\text{F NMR}$  (471 MHz,  $\text{CDCl}_3$ )  $\delta$  -57.92 (s). **HRMS** (ESI)  $m/z$  calcd. for  $\text{C}_8\text{H}_{12}\text{F}_3\text{N}_3\text{ONa}$   $[\text{M}+\text{Na}]^+$  246.0825, found 246.0813.

---

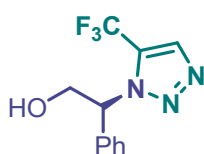

(25) Colorless oil;  $^1\text{H NMR}$  (600 MHz,  $\text{CDCl}_3$ )  $\delta$  7.93 (s, 1H), 7.38-7.33 (m, 3H), 7.32-7.26 (m, 2H), 5.76-5.68 (m, 1H), 4.83-4.74 (m, 1H), 4.22-4.16 (m, 1H), 3.67 (br, 1H).  $^{13}\text{C NMR}$  (150 MHz,  $\text{CDCl}_3$ )  $\delta$  134.9, 134.1, 129.1, 129.0, 128.8 (q,  $J = 40.5$  Hz), 127.0, 119.6 (q,  $J = 267.0$  Hz), 67.5, 64.9.  $^{19}\text{F NMR}$  (471 MHz,  $\text{CDCl}_3$ )  $\delta$  -58.70 (s). **HRMS** (ESI)  $m/z$  calcd. for  $\text{C}_{11}\text{H}_{10}\text{F}_3\text{N}_3\text{ONa}$   $[\text{M}+\text{Na}]^+$  280.0668, found 280.0664.

---

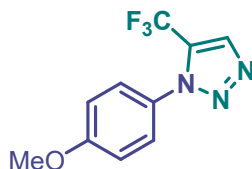

(26) Colorless oil;  $^1\text{H NMR}$  (600 MHz,  $\text{CDCl}_3$ )  $\delta$  8.09 (s, 1H), 7.41 (d,  $J = 9.0$  Hz, 2H), 7.03 (d,  $J = 9.0$  Hz, 2H), 3.88 (s, 3H).  $^{13}\text{C NMR}$  (150 MHz,  $\text{CDCl}_3$ )  $\delta$  161.2, 134.4, 128.9 (q,  $J = 40.5$  Hz), 128.0, 126.8, 119.6 (q,  $J = 267.0$  Hz), 114.6, 55.6.  $^{19}\text{F NMR}$  (471 MHz,  $\text{CDCl}_3$ )  $\delta$  -57.72 (s). **HRMS** (ESI)  $m/z$  calcd. for  $\text{C}_{10}\text{H}_8\text{F}_3\text{N}_3\text{ONa}$   $[\text{M}+\text{Na}]^+$  266.0512, found 266.0515.

---

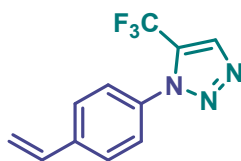

(27) Colorless oil;  $^1\text{H NMR}$  (600 MHz,  $\text{CDCl}_3$ )  $\delta$  8.12 (s, 1H), 7.58 (d,  $J = 8.4$  Hz, 2H), 7.48 (d,  $J$

= 8.4 Hz, 2H), 6.78 (dd,  $J=17.4, 10.8$  Hz, 1H), 5.88 (d,  $J = 17.4$  Hz, 1H), 5.43 (d,  $J = 10.8$  Hz, 1H).  $^{13}\text{C}$  NMR (150 MHz,  $\text{CDCl}_3$ )  $\delta$  140.1, 135.2, 134.7, 134.4, 128.8 (q,  $J = 42.0$  Hz), 127.1, 125.5, 119.6 (q,  $J = 267.0$  Hz), 116.7.  $^{19}\text{F}$  NMR (471 MHz,  $\text{CDCl}_3$ )  $\delta$  -57.46 (s). HRMS (ESI)  $m/z$  calcd. for  $\text{C}_{11}\text{H}_8\text{F}_3\text{N}_3\text{Na}$   $[\text{M}+\text{Na}]^+$  262.0567, found 262.0563.

---

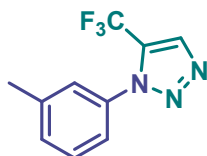

(28) Colorless oil;  $^1\text{H}$  NMR (600 MHz,  $\text{CDCl}_3$ )  $\delta$  8.11 (s, 1H), 7.44 (t,  $J = 7.2$  Hz, 1H), 7.40 (d,  $J = 7.8$  Hz, 1H), 7.33 (s, 1H), 7.30 (d,  $J = 7.8$  Hz, 1H), 2.45 (s, 3H).  $^{13}\text{C}$  NMR (150 MHz,  $\text{CDCl}_3$ )  $\delta$  139.8, 135.2, 134.6, 131.5, 129.2, 128.8 (q,  $J = 40.5$  Hz), 126.0, 122.3, 119.6 (q,  $J = 267.0$  Hz), 21.2.  $^{19}\text{F}$  NMR (471 MHz,  $\text{CDCl}_3$ )  $\delta$  -57.52 (s). HRMS (ESI)  $m/z$  calcd. for  $\text{C}_{10}\text{H}_9\text{F}_3\text{N}_3$   $[\text{M}+\text{H}]^+$  228.0749, found 228.0755.

---

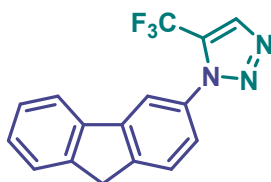

(29) Colorless oil;  $^1\text{H}$  NMR (600 MHz,  $\text{CDCl}_3$ )  $\delta$  8.14 (s, 1H), 7.89 (d,  $J = 8.4$  Hz, 1H), 7.82 (d,  $J = 7.2$  Hz, 1H), 7.65 (s, 1H), 7.57 (d,  $J = 7.2$  Hz, 1H), 7.50 (d,  $J = 7.8$  Hz, 1H), 7.42 (t,  $J = 7.8$  Hz, 1H), 7.40-7.35 (m, 1H), 3.96 (s, 2H).  $^{13}\text{C}$  NMR (150 MHz,  $\text{CDCl}_3$ )  $\delta$  144.3, 144.2, 143.6, 139.9, 134.6 (q,  $J = 1.5$  Hz), 133.4, 128.9 (q,  $J = 42.0$  Hz), 127.9, 127.1, 125.2, 124.2, 122.2, 120.5, 120.3, 119.6 (q,  $J = 267.0$  Hz), 36.9.  $^{19}\text{F}$  NMR (471 MHz,  $\text{CDCl}_3$ )  $\delta$  -57.43 (s). HRMS (ESI)  $m/z$  calcd. for  $\text{C}_{10}\text{H}_8\text{F}_3\text{N}_3$ . HRMS (ESI)  $m/z$  calcd. for  $\text{C}_{16}\text{H}_{10}\text{F}_3\text{N}_3\text{Na}$   $[\text{M}+\text{Na}]^+$  324.0719, found 324.0717.

---

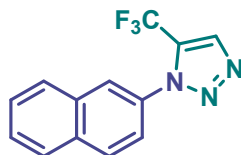

(30) Colorless oil;  $^1\text{H}$  NMR (600 MHz,  $\text{CDCl}_3$ )  $\delta$  8.17 (s, 1H), 8.03-8.00 (m, 2H), 7.97-7.92 (m, 2H), 7.65-7.59 (m, 2H), 7.59-7.56 (m, 1H).  $^{13}\text{C}$  NMR (150 MHz,  $\text{CDCl}_3$ )  $\delta$  134.7, 133.7, 132.7,

132.6, 129.7, 129.0 (q,  $J = 40.5$  Hz), 128.5, 128.0, 127.9, 127.6, 124.7, 122.4, 119.7 (q,  $J = 267.0$  Hz).  $^{19}\text{F}$  NMR (471 MHz,  $\text{CDCl}_3$ )  $\delta$  -57.37 (s). HRMS (ESI)  $m/z$  calcd. for  $\text{C}_{13}\text{H}_8\text{F}_3\text{N}_3\text{Na}$   $[\text{M}+\text{Na}]^+$  286.0563, found 286.0558.

---

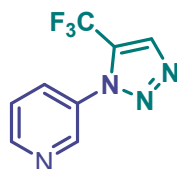

(31) Colorless oil;  $^1\text{H}$  NMR (600 MHz,  $\text{CDCl}_3$ )  $\delta$  8.87 (d,  $J = 4.2$  Hz, 1H), 8.84 (d,  $J = 1.8$  Hz, 1H), 8.18 (s, 1H), 7.90 (d,  $J = 8.4$  Hz, 1H), 7.57 (dd,  $J = 8.4, 4.2$  Hz, 1H).  $^{13}\text{C}$  NMR (150 MHz,  $\text{CDCl}_3$ )  $\delta$  151.8, 146.0, 134.9, 132.8, 132.2, 129.1 (q,  $J = 42.0$  Hz), 124.0, 119.4 (q,  $J = 267.0$  Hz).  $^{19}\text{F}$  NMR (471 MHz,  $\text{CDCl}_3$ )  $\delta$  -60.54 (s). HRMS (ESI)  $m/z$  calcd. for  $\text{C}_8\text{H}_6\text{F}_3\text{N}_4$ .  $[\text{M}+\text{H}]^+$  215.0543, found 215.0545.

---

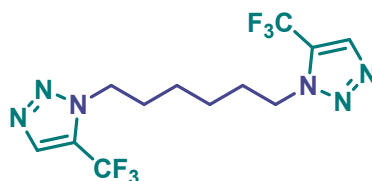

(32) White solid; mp: 78-79 °C;  $^1\text{H}$  NMR (600 MHz,  $\text{CDCl}_3$ )  $\delta$  7.96 (s, 2H), 4.47-4.43 (m, 4H), 1.99-1.96 (m, 4H), 1.43-1.30 (m, 4H).  $^{13}\text{C}$  NMR (150 MHz,  $\text{CDCl}_3$ )  $\delta$  134.2, 127.7 (q,  $J = 42.0$  Hz), 119.9 (q,  $J = 265.5$  Hz), 49.7, 29.5, 25.7.  $^{19}\text{F}$  NMR (471 MHz,  $\text{CDCl}_3$ )  $\delta$  -59.12 (s). HRMS (ESI)  $m/z$  calcd. for  $\text{C}_{12}\text{H}_{14}\text{F}_6\text{N}_6$   $[\text{M}+\text{Na}]^+$  379.1082, found 379.1080.

---

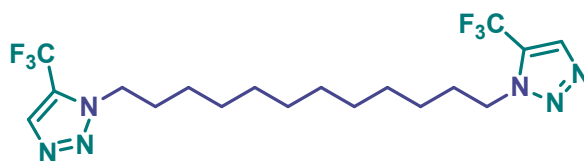

(33) Colorless oil;  $^1\text{H}$  NMR (600 MHz,  $\text{CDCl}_3$ )  $\delta$  7.95 (s, 2H), 4.48-4.41 (m, 4H), 1.98-1.92 (m, 4H), 1.37-1.22 (m, 16H).  $^{13}\text{C}$  NMR (150 MHz,  $\text{CDCl}_3$ )  $\delta$  134.1, 127.6 (q,  $J = 42.0$  Hz), 120.0 (q,  $J = 267.0$  Hz), 50.1, 29.9, 29.3, 29.2, 28.8, 26.3.  $^{19}\text{F}$  NMR (471 MHz,  $\text{CDCl}_3$ )  $\delta$  -59.14 (s). HRMS (ESI)  $m/z$  calcd. for  $\text{C}_{18}\text{H}_{27}\text{F}_6\text{N}_6$   $[\text{M}+\text{H}]^+$  441.2201, found 441.2201.

---

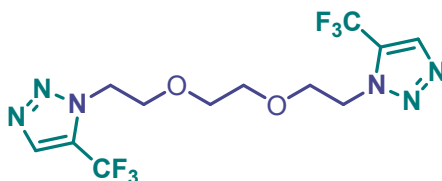

(34) Colorless oil;  $^1\text{H NMR}$  (600 MHz,  $\text{CDCl}_3$ )  $\delta$  7.95 (s, 2H), 4.60 (t,  $J = 6.0$  Hz, 4H), 3.92 (t,  $J = 6.0$  Hz), 4H, 3.52 (s, 4H).  $^{13}\text{C NMR}$  (150 MHz,  $\text{CDCl}_3$ )  $\delta$  134.1, 128.3 (q,  $J = 40.5$  Hz), 119.8 (q,  $J = 267.0$  Hz), 70.6, 68.7, 49.6.  $^{19}\text{F NMR}$  (471 MHz,  $\text{CDCl}_3$ )  $\delta$  -58.74 (s). **HRMS** (ESI)  $m/z$  calcd. for  $\text{C}_{12}\text{H}_{15}\text{F}_6\text{N}_6\text{O}_2$   $[\text{M}+\text{H}]^+$  389.1164, found 389.1161.

---

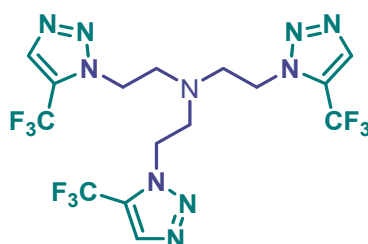

(35) Colorless liquid.  $^1\text{H NMR}$  (600 MHz,  $\text{CDCl}_3$ )  $\delta$  7.97 (s, 3H), 4.41 (t,  $J = 7.0$  Hz, 6H), 3.18 (t,  $J = 7.0$  Hz, 6H).  $^{13}\text{C NMR}$  (150 MHz,  $\text{CDCl}_3$ )  $\delta$  134.3, 127.9 (q,  $J = 40.5$  Hz), 119.8 (q,  $J = 267.0$  Hz), 53.3, 47.7.  $^{19}\text{F NMR}$  (471 MHz,  $\text{CDCl}_3$ )  $\delta$  -59.05 (s). **HRMS** (ESI)  $m/z$  calcd. for  $\text{C}_{15}\text{H}_{16}\text{F}_9\text{N}_{10}$   $[\text{M}+\text{H}]^+$  507.1414, found 507.1416.

---

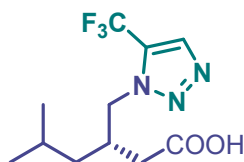

(36) Colorless oil;  $^1\text{H NMR}$  (600 MHz,  $\text{CDCl}_3$ )  $\delta$  9.75 (br, 1H), 7.98 (s, 1H), 4.52-4.39 (m, 2H), 2.67-2.59 (m, 1H), 2.45-2.36 (m, 2H), 1.65-1.58 (m, 1H), 1.35-1.29 (m, 1H), 1.22-1.16 (m, 1H), 0.90 (d  $J = 6.6$  Hz, 3H), 0.85 (d  $J = 6.6$  Hz, 3H).  $^{13}\text{C NMR}$  (150 MHz,  $\text{CDCl}_3$ )  $\delta$  177.0, 134.3, 128.2 (q,  $J = 42.0$  Hz), 119.7 (q,  $J = 265.5$  Hz), 53.5, 41.0, 36.2, 33.4, 25.1, 22.5, 22.1.  $^{19}\text{F NMR}$  (471 MHz,  $\text{CDCl}_3$ )  $\delta$  -58.87 (s). **HRMS** (ESI)  $m/z$  calcd. for  $\text{C}_{11}\text{H}_{17}\text{F}_3\text{N}_3\text{O}_2$   $[\text{M}+\text{H}]^+$  280.1279, found 280.1273.

---

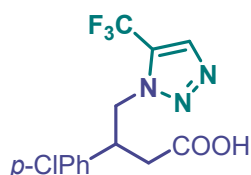

(37) Colorless oil;  $^1\text{H NMR}$  (600 MHz,  $\text{CDCl}_3$ )  $\delta$  7.91 (s, 1H), 7.27 (d,  $J = 8.4$  Hz, 2H), 7.09 (d,  $J = 8.4$  Hz, 2H), 4.72-4.68 (m, 1H), 4.59-4.54 (m, 1H), 3.91-3.85 (m, 1H), 2.87-2.77 (m, 2H).  $^{13}\text{C NMR}$  (150 MHz,  $\text{CDCl}_3$ )  $\delta$  175.2, 137.0, 134.2, 133.9, 129.2, 128.7, 128.2 (q,  $J = 42.0$  Hz), 119.7 (q,  $J = 267.0$  Hz), 54.2, 41.2, 37.2.  $^{19}\text{F NMR}$  (471 MHz,  $\text{CDCl}_3$ )  $\delta$  -58.74 (s). **HRMS** (ESI)  $m/z$  calcd. for  $\text{C}_{13}\text{H}_{12}\text{ClF}_3\text{N}_3\text{O}_2$   $[\text{M}+\text{H}]^+$  334.0565, found 334.0570.

---

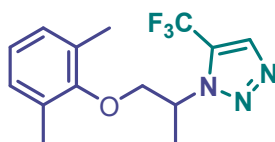

(38) Colorless oil;  $^1\text{H NMR}$  (600 MHz,  $\text{CDCl}_3$ )  $\delta$  8.00 (s, 1H), 6.96 (d,  $J = 7.2$  Hz, 2H), 6.92-6.88 (m, 1H), 5.12-5.04 (m, 1H), 4.31 (t,  $J = 9.0$  Hz, 1H), 4.09 (dd,  $J = 9.6, 4.8$  Hz, 1H), 2.09 (s, 6H), 1.77 (d,  $J = 7.2$  Hz, 3H).  $^{13}\text{C NMR}$  (150 MHz,  $\text{CDCl}_3$ )  $\delta$  154.4, 133.6 (q,  $J = 1.5$  Hz), 130.6, 128.9, 128.4 (q,  $J = 40.5$  Hz), 124.3, 119.9 (q,  $J = 267.0$  Hz), 73.4, 57.1, 17.8, 15.7.  $^{19}\text{F NMR}$  (471 MHz,  $\text{CDCl}_3$ )  $\delta$  -58.57 (s). **HRMS** (ESI)  $m/z$  calcd. for  $\text{C}_{14}\text{H}_{17}\text{F}_3\text{N}_3\text{O}$   $[\text{M}+\text{H}]^+$  300.1328, found 300.1324.

---

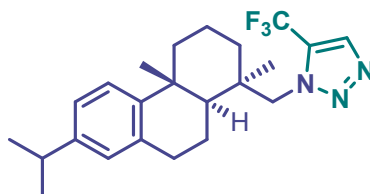

(39) Yellow solid; mp: 102-103  $^\circ\text{C}$ ;  $^1\text{H NMR}$  (600 MHz,  $\text{CDCl}_3$ )  $\delta$  7.96 (s, 1H), 7.17 (d,  $J = 8.4$  Hz, 1H), 7.03-6.99 (m, 1H), 6.94 (s, 1H), 4.34 (q,  $J = 14.4$  Hz, 1H), 3.10-3.03 (m, 1H), 3.01-2.96 (m, 1H), 2.88-2.82 (m, 1H), 2.33-2.26 (m, 1H), 2.05-2.01 (m, 1H), 1.93-1.88 (m, 1H), 1.80-1.63 (m, 3H), 1.51-1.44 (m, 1H), 1.35 (td,  $J = 12.6, 4.2$  Hz, 1H), 1.28 (s, 3H), 1.27-1.20 (m, 7H), 1.13 (s, 3H).  $^{13}\text{C NMR}$  (150 MHz,  $\text{CDCl}_3$ )  $\delta$  146.7, 145.8, 134.5, 133.8 (q,  $J = 1.5$  Hz), 129.2 (q,  $J = 40.5$  Hz), 126.9, 124.0, 123.9, 119.9 (q,  $J = 265.5$  Hz), 60.0, 45.8, 38.9, 38.0, 37.7, 36.1, 33.4, 29.8, 25.5, 23.94, 23.90, 19.3, 18.4, 18.3.  $^{19}\text{F NMR}$  (471 MHz,  $\text{CDCl}_3$ )  $\delta$  -57.25 (s). **HRMS** (ESI)  $m/z$  calcd. for  $\text{C}_{23}\text{H}_{31}\text{F}_3\text{N}_3$   $[\text{M}+\text{H}]^+$  406.2474, found 406.2470.

---

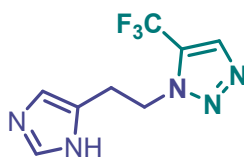

(40) White solid; mp: 55-56 °C;  $^1\text{H NMR}$  (600 MHz,  $\text{CDCl}_3$ )  $\delta$  7.92 (s, 1H), 7.56 (s, 1H), 6.74 (s, 1H), 4.76-4.69 (m, 3H), 3.27 (t,  $J = 7.2$  Hz, 2H).  $^{13}\text{C NMR}$  (150 MHz,  $\text{CDCl}_3$ )  $\delta$  135.2, 134.3, 134.0 (q,  $J = 1.5$  Hz), 127.9 (q,  $J = 42.0$  Hz), 119.8 (q,  $J = 267.0$  Hz), 115.2, 49.9, 28.2.  $^{19}\text{F NMR}$  (471 MHz,  $\text{CDCl}_3$ )  $\delta$  -58.21 (s). **HRMS** (ESI)  $m/z$  calcd. for  $\text{C}_8\text{H}_9\text{F}_3\text{N}_5$   $[\text{M}+\text{H}]^+$  232.0816, found 232.0810.

---

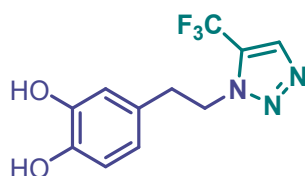

(41) Colorless oil;  $^1\text{H NMR}$  (500 MHz, DMSO)  $\delta$  8.78 (s, 1H), 8.74 (s, 1H), 8.39 (s, 1H), 6.60 (d,  $J = 8.0$  Hz, 1H), 6.51 (s, 1H), 6.35 (d,  $J = 8.0$  Hz, 1H), 4.62 (t,  $J = 7.3$  Hz, 2H), 3.01 (t,  $J = 7.5$  Hz, 2H).  $^{13}\text{C NMR}$  (125 MHz, DMSO)  $\delta$  145.7, 144.6, 135.1, 127.9, 127.2 (q,  $J = 40.0$  Hz), 120.4 (q,  $J = 267.0$  Hz), 119.8, 116.5, 116.1, 51.7, 35.4.  $^{19}\text{F NMR}$  (471 MHz, MeOD)  $\delta$  -56.46 (s). **HRMS** (ESI)  $m/z$  calcd. for  $\text{C}_{11}\text{H}_{11}\text{F}_3\text{N}_3\text{O}_2$   $[\text{M}+\text{H}]^+$  274.0806, found 274.0803.

---

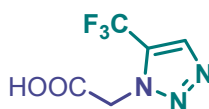

(42) Colorless oil;  $^1\text{H NMR}$  (600 MHz, MeOD)  $\delta$  8.24 (s, 1H), 5.42 (s, 2H).  $^{13}\text{C NMR}$  (150 MHz, MeOD)  $\delta$  169.0, 135.7, 130.0 (q,  $J = 42.0$  Hz), 121.4 (q,  $J = 265.5$  Hz), 51.8.  $^{19}\text{F NMR}$  (471 MHz, MeOD)  $\delta$  -60.70 (s). **HRMS** (ESI)  $m/z$  calcd. for  $\text{C}_5\text{H}_5\text{F}_3\text{N}_3\text{O}_2$   $[\text{M}+\text{H}]^+$  196.0343, found 196.0334.

---

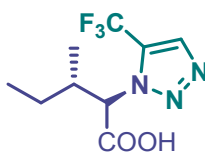

(43) White solid; mp: 142-143 °C;  $^1\text{H NMR}$  (600 MHz, MeOD)  $\delta$  8.23 (s, 1H), 5.06 (d,  $J = 7.8$  Hz, 1H), 2.76-2.66 (m, 1H), 1.46-1.33 (m, 2H), 1.14 (d,  $J = 6.6$  Hz, 3H), 0.93 (t,  $J = 7.8$  Hz, 3H).  $^{13}\text{C NMR}$  (150 MHz, MeOD)  $\delta$  170.1, 135.0 (q,  $J = 2.0$  Hz), 130.4 (q,  $J = 40.5$  Hz), 121.4 (q,  $J = 265.5$  Hz), 68.7, 38.3, 27.2, 16.3, 11.7.  $^{19}\text{F NMR}$  (471 MHz, MeOD)  $\delta$  -56.27 (s). **HRMS** (ESI)  $m/z$  calcd. for  $[\text{M}+\text{H}]^+$   $\text{C}_9\text{H}_{13}\text{F}_3\text{N}_3\text{O}_2$   $[\text{M}+\text{H}]^+$  252.0961, found 252.0960.

---



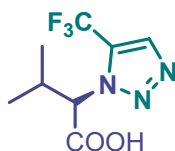

(44) White solid; mp: 65-66 °C;  $^1\text{H NMR}$  (600 MHz, MeOD)  $\delta$  8.19 (s, 1H), 4.83-4.80 (m, 1H), 2.97-2.89 (m, 1H), 1.13 (d,  $J = 6.6$  Hz, 3H), 0.99 (d,  $J = 6.6$  Hz, 3H).  $^{13}\text{C NMR}$  (150 MHz,  $\text{CDCl}_3$ )  $\delta$  170.2, 133.4, 129.3 (q,  $J = 40.5$  Hz), 119.5 (q,  $J = 267.0$  Hz), 68.1, 30.8, 19.3, 19.1.  $^{19}\text{F NMR}$  (471 MHz,  $\text{CDCl}_3$ )  $\delta$  -58.70 (s). **HRMS** (ESI)  $m/z$  calcd. for  $\text{C}_8\text{H}_{11}\text{F}_3\text{N}_3\text{O}_2$   $[\text{M}+\text{H}]^+$  238.0810, found 238.0803.

---

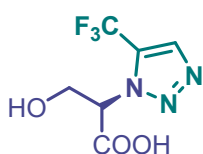

(45) White solid; mp: 128-129 °C;  $^1\text{H NMR}$  (600 MHz, DMSO)  $\delta$  8.46 (s, 1H), 5.41 (dd,  $J = 8.4$ , 5.4 Hz, 1H), 4.30-4.22 (m, 2H).  $^{13}\text{C NMR}$  (150 MHz, DMSO)  $\delta$  167.9, 134.9, 128.7 (q,  $J = 40.5$  Hz), 120.3 (q,  $J = 267.0$  Hz), 65.4, 60.7.  $^{19}\text{F NMR}$  (471 MHz, DMSO)  $\delta$  -57.49 (s). **HRMS** (ESI)  $m/z$  calcd. for  $\text{C}_6\text{H}_7\text{F}_3\text{N}_3\text{O}_3$   $[\text{M}+\text{H}]^+$  226.0450, found 226.0440.

---

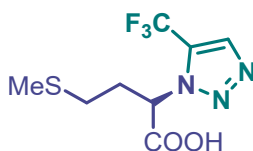

(46) White solid; mp: 85-86 °C;  $^1\text{H NMR}$  (600 MHz, MeOD)  $\delta$  8.25 (s, 1H), 5.65-5.60 (m, 1H), 2.89-2.81 (m, 1H), 2.75-2.68 (m, 1H), 2.62-2.56 (m, 1H), 2.48-2.42 (m, 1H), 2.08 (s, 3H).  $^{13}\text{C NMR}$  (150 MHz, MeOD)  $\delta$  170.9, 135.5, 130.4 (q,  $J = 42.0$  Hz), 121.4 (q,  $J = 267.0$  Hz), 62.6, 31.2, 31.1, 15.0.  $^{19}\text{F NMR}$  (471 MHz, MeOD)  $\delta$  -60.25 (s). **HRMS** (ESI)  $m/z$  calcd. for  $\text{C}_8\text{H}_{11}\text{F}_3\text{N}_3\text{O}_2\text{S}$   $[\text{M}+\text{H}]^+$  270.0531, found 270.0524.

---

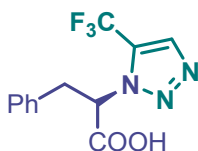

(47) White solid; mp: 130-131 °C;  $^1\text{H NMR}$  (600 MHz, MeOD)  $\delta$  8.07 (s, 1H), 7.20-7.12 (m, 3H), 7.09 (d,  $J = 7.2$  Hz, 2H),  $\delta$  5.58 (dd,  $J = 11.4$ , 4.8 Hz, 1H), 3.82-3.71 (m, 2H).  $^{13}\text{C NMR}$  (150

MHz, MeOD)  $\delta$  170.1, 137.2, 134.9 (q,  $J = 1.5$  Hz), 130.5 (q,  $J = 40.5$  Hz), 130.1, 129.7, 128.3, 121.1 (q,  $J = 265.5$  Hz), 65.7, 38.2.  **$^{19}\text{F}$  NMR** (471 MHz, MeOD)  $\delta$  -60.24 (s). **HRMS** (ESI)  $m/z$  calcd. for  $\text{C}_{12}\text{H}_{11}\text{F}_3\text{N}_3\text{O}_2[\text{M}+\text{H}]^+$  286.0811, found 286.0803.

---

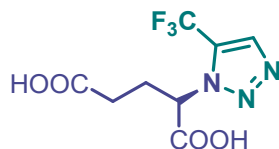

**(48)** White solid; mp: 51-52 °C;  **$^1\text{H}$  NMR** (600 MHz, DMSO)  $\delta$  8.27 (s, 1H), 4.85 (dd,  $J = 10.0$ , 4.5 Hz, 1H), 2.66-2.55 (m, 1H), 2.46-2.35 (m, 1H), 2.10-1.94 (m, 2H).  **$^{13}\text{C}$  NMR** (150 MHz, MeOD)  $\delta$  175.7, 170.9, 135.4, 130.4 (q,  $J = 40.5$  Hz), 121.3 (q,  $J = 267.0$  Hz), 63.3, 30.8, 27.5.  **$^{19}\text{F}$  NMR** (471 MHz, MeOD)  $\delta$  -60.20 (s). **HRMS** (ESI)  $m/z$  calcd. for  $\text{C}_8\text{H}_8\text{F}_3\text{N}_3\text{O}_4\text{Na} [\text{M}+\text{Na}]^+$  290.1540, found 290.1542.

---

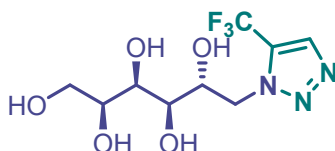

**(49)** White solid; mp: 154-155 °C;  **$^1\text{H}$  NMR** (600 MHz, DMSO)  $\delta$  8.38 (s, 1H), 5.11 (d,  $J = 5.4$  Hz, 1H), 4.75 (d,  $J = 6.6$  Hz, 1H), 4.72-4.67 (m, 1H), 4.54-4.47 (m, 2H), 4.43 (d,  $J = 7.2$  Hz, 1H), 4.39 (t,  $J = 5.4$  Hz, 1H), 4.14-4.09 (m, 1H), 3.81-3.74 (m, 1H), 3.63-3.54 (m, 2H), 3.52-3.46 (m, 1H), 3.45-3.39 (m, 1H).  **$^{13}\text{C}$  NMR** (150 MHz, DMSO)  $\delta$  134.9, 128.1 (q,  $J = 40.5$  Hz), 120.4 (q,  $J = 267.0$  Hz), 72.3, 72.0, 70.7, 70.5, 63.8, 53.3.  **$^{19}\text{F}$  NMR** (471 MHz, DMSO)  $\delta$  -57.06 (s). **HRMS** (ESI)  $m/z$  calcd. for  $\text{C}_9\text{H}_{15}\text{F}_3\text{N}_3\text{O}_5 [\text{M}+\text{H}]^+$  302.0971, found 302.0964.

---

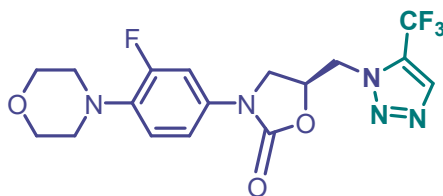

**(50)** White solid; mp: 148-149 °C;  **$^1\text{H}$  NMR** (600 MHz,  $\text{CDCl}_3$ )  $\delta$  8.02 (s, 1H), 7.37 (dd,  $J = 14.4$ , 2.4 Hz, 1H), 7.06 (dd,  $J = 9.0$ , 1.8 Hz, 1H), 6.90 (t,  $J = 9.0$  Hz, 1H), 5.21-5.15 (m, 1H), 4.83-4.72 (m, 2H), 4.20 (t,  $J = 9.0$  Hz, 1H), 4.02 (dd,  $J = 9.0$ , 6.0 Hz, 1H), 3.87-3.81 (m, 4H), 3.07-3.00 (m, 4H).  **$^{13}\text{C}$  NMR** (150 MHz,  $\text{CDCl}_3$ )  $\delta$  155.4 (d,  $J = 246.0$  Hz), 153.1, 136.8 (d,  $J = 9.0$  Hz), 134.4,

132.3 (d,  $J = 10.5$  Hz), 128.8 (q,  $J = 42.0$  Hz), 119.5 (q,  $J = 267.0$  Hz), 118.8 (d,  $J = 4.5$  Hz), 114.1 (d,  $J = 3.0$  Hz), 107.6 (d,  $J = 26.0$  Hz), 69.5, 66.9, 51.5, 50.9 (d,  $J = 3.0$  Hz), 48.3.  **$^{19}\text{F}$  NMR** (471 MHz,  $\text{CDCl}_3$ )  $\delta$  -58.54 (s), (-119.88)-(-120.05) (m). **HRMS** (ESI)  $m/z$  calcd. for  $\text{C}_{17}\text{H}_{18}\text{F}_4\text{N}_5\text{O}_3$   $[\text{M}+\text{H}]^+$  416.1341, found 416.1346.

---

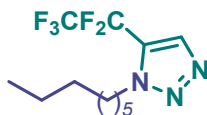

**(51)** Colorless oil;  **$^1\text{H}$  NMR** (600 MHz,  $\text{CDCl}_3$ )  $\delta$  7.93 (s, 1H), 4.47 (t,  $J = 7.2$  Hz, 2H), 2.01-1.94 (m, 2H), 1.41-1.15 (m, 10H), 0.87 (t,  $J = 7.2$  Hz, 3H).  **$^{13}\text{C}$  NMR** (150 MHz,  $\text{CDCl}_3$ )  $\delta$  135.2, 125.4 (t,  $J = 30.0$  Hz), 118.3 (qt,  $J = 284.0$  Hz, 36.0 Hz), 117.3 (tq,  $J = 250.5$  Hz, 40.5 Hz), 50.7, 31.7, 30.2, 29.0, 28.9, 26.4, 22.6, 14.0.  **$^{19}\text{F}$  NMR** (471 MHz,  $\text{CDCl}_3$ )  $\delta$  (-83.72)-(-84.50) (m), (-109.45)-(-109.50) (m). **HRMS** (ESI)  $m/z$  calcd. for  $\text{C}_{12}\text{H}_{18}\text{F}_5\text{N}_3\text{Na}$   $[\text{M}+\text{Na}]^+$  322.1313, found 322.1308.

---

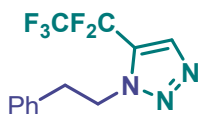

**(52)** Colorless oil;  **$^1\text{H}$  NMR** (600 MHz,  $\text{CDCl}_3$ )  $\delta$  7.94 (s, 1H), 7.34-7.29 (m, 2H), 7.28-7.25 (m, 1H), 7.19-7.16 (m, 2H), 4.70-4.66 (m, 2H), 3.31-3.27 (m, 2H).  **$^{13}\text{C}$  NMR** (150 MHz,  $\text{CDCl}_3$ )  $\delta$  136.2, 135.2, 128.9, 128.7, 127.3, 125.6 (t,  $J = 28.5$  Hz), 118.2 (qt,  $J = 285.0$ , 37.5 Hz), 110.0 (tq,  $J = 250.5$ , 40.5 Hz), 51.7, 36.7.  **$^{19}\text{F}$  NMR** (471 MHz,  $\text{CDCl}_3$ )  $\delta$  (-83.73)-(-84.39) (m), -109.53 (s). **HRMS** (ESI)  $m/z$  calcd. for  $\text{C}_{12}\text{H}_{10}\text{F}_5\text{N}_3\text{Na}$   $[\text{M}+\text{Na}]^+$  314.0687, found 314.0665.

---

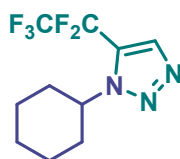

**(53)** White solid; mp: 41-42 °C;  **$^1\text{H}$  NMR** (600 MHz,  $\text{CDCl}_3$ )  $\delta$  7.93 (s, 1H), 4.42-4.39 (m, 1H), 2.16-2.06 (m, 4H), 2.01-1.95 (m, 2H), 1.81-1.75 (m, 1H), 1.51-1.40 (m, 2H), 1.39-1.29 (m, 1H).  **$^{13}\text{C}$  NMR** (150 MHz,  $\text{CDCl}_3$ )  $\delta$  134.6, 124.9 (t,  $J = 28.5$  Hz), 118.3 (qt,  $J = 283.5$ , 36.0 Hz), 110.1 (tq,  $J = 250.5$ , 42.0 Hz), 61.2, 33.5, 25.5, 24.9.  **$^{19}\text{F}$  NMR** (471 MHz,  $\text{CDCl}_3$ )  $\delta$  (-83.75)-(-84.34) (m), (-109.15)-(-109.86) (m). **HRMS** (ESI)  $m/z$  calcd. for  $\text{C}_{10}\text{H}_{12}\text{F}_5\text{N}_3\text{Na}$   $[\text{M}+\text{Na}]^+$  292.0844,

found 292.0838.

---

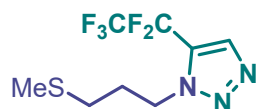

(54) Colorless oil;  $^1\text{H NMR}$  (500 MHz,  $\text{CDCl}_3$ )  $\delta$  7.95 (s, 1H), 4.61 (t,  $J = 7.0$  Hz, 2H), 2.59 (t,  $J = 7.0$  Hz, 2H), 2.31-2.26 (m, 2H), 2.11 (s, 3H).  $^{13}\text{C NMR}$  (125 MHz,  $\text{CDCl}_3$ )  $\delta$  135.3, 125.6 (t,  $J = 29.0$  Hz), 118.2 (qt,  $J = 286.0, 36.5$  Hz), 110.0 (tq,  $J = 253.3, 41.6$  Hz), 49.3, 30.8, 29.0, 15.2.  $^{19}\text{F NMR}$  (471 MHz,  $\text{CDCl}_3$ )  $\delta$  (-83.81)-(-84.13) (m), (-109.34)-(-109.55) (m). **HRMS** (ESI)  $m/z$  calcd. for  $\text{C}_8\text{H}_{11}\text{F}_5\text{N}_3\text{S}$   $[\text{M}+\text{H}]^+$  276.0604, found 276.0594.

---

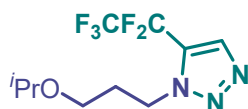

(55) Colorless oil;  $^1\text{H NMR}$  (500 MHz,  $\text{CDCl}_3$ )  $\delta$  7.94 (s, 1H), 4.59 (t,  $J = 7.0$  Hz, 2H), 3.58-3.49 (m, 1H), 3.47 (t,  $J = 6.0$  Hz, 2H), 2.27-2.18 (m, 2H), 1.12 (d,  $J = 6.0$  Hz, 3H).  $^{13}\text{C NMR}$  (125 MHz,  $\text{CDCl}_3$ )  $\delta$  135.3, 125.7 (t,  $J = 29.0$  Hz), 118.3 (qt,  $J = 287.3, 36.5$  Hz), 110.0 (tq,  $J = 253.3, 41.6$  Hz), 71.7, 64.1, 48.0, 30.5, 21.9.  $^{19}\text{F NMR}$  (471 MHz,  $\text{CDCl}_3$ )  $\delta$  (-83.43)-(-84.57) (m), -109.54 (s). **HRMS** (ESI)  $m/z$  calcd. for  $\text{C}_{10}\text{H}_{14}\text{F}_5\text{N}_3\text{ONa}$   $[\text{M}+\text{Na}]^+$  310.0949, found 310.0939.

---

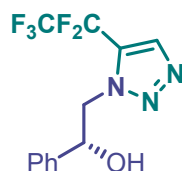

(56) Colorless oil;  $^1\text{H NMR}$  (600 MHz,  $\text{CDCl}_3$ )  $\delta$  7.97 (s, 1H), 7.45-7.38 (m, 4H), 7.38-7.34 (m, 1H), 5.37 (dd,  $J = 9.0, 3.0$  Hz, 1H), 4.68-4.57 (m, 2H), 3.22 (s, 1H).  $^{13}\text{C NMR}$  (150 MHz,  $\text{CDCl}_3$ )  $\delta$  139.4, 135.3, 128.9, 128.7, 126.5 (t,  $J = 30.0$  Hz), 125.9, 118.2 (qt,  $J = 284.0, 36.5$  Hz), 109.9 (tq,  $J = 252.0, 40.5$  Hz), 72.6, 57.3.  $^{19}\text{F NMR}$  (471 MHz,  $\text{CDCl}_3$ )  $\delta$  (-85.47)-(-85.89) (m), -109.95 (s). **HRMS** (ESI)  $m/z$  calcd. for  $\text{C}_{12}\text{H}_{10}\text{F}_5\text{N}_3\text{ONa}$   $[\text{M}+\text{Na}]^+$  330.0636, found 330.0611.

---

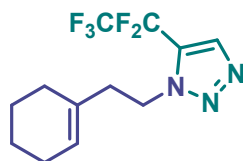

(57) Colorless oil;  $^1\text{H NMR}$  (600 MHz,  $\text{CDCl}_3$ )  $\delta$  7.91 (s, 1H), 5.42-5.39 (m, 1H), 4.53 (t,  $J = 7.2$  Hz, 2H), 2.56 (t,  $J = 7.2$  Hz, 2H), 2.00-1.90 (m, 4H), 1.66-1.60 (m, 2H), 1.56-1.50 (m, 2H).  $^{13}\text{C NMR}$  (150 MHz,  $\text{CDCl}_3$ )  $\delta$  135.2, 132.5, 125.4 (t,  $J = 28.5$  Hz), 125.0, 118.3 (qt,  $J = 284.0$ , 36.5 Hz), 110.1 (tq,  $J = 252.0$ , 41.0 Hz), 49.5, 38.7, 28.0, 25.1, 22.6, 22.0.  $^{19}\text{F NMR}$  (471 MHz,  $\text{CDCl}_3$ )  $\delta$  (-83.87)-(-84.24) (m), (-109.32)-(-109.52) (m). **HRMS** (ESI)  $m/z$  calcd. for  $\text{C}_{12}\text{H}_{14}\text{F}_5\text{N}_3$  Na  $[\text{M}+\text{Na}]^+$  318.1000, found 318.0999.

---

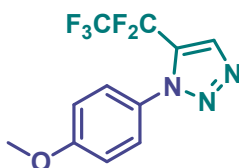

(58) Colorless oil;  $^1\text{H NMR}$  (600 MHz,  $\text{CDCl}_3$ )  $\delta$  8.07 (s, 1H), 7.36 (d,  $J = 9.0$  Hz, 2H), 7.03-6.99 (m, 2H), 3.87 (s, 3H).  $^{13}\text{C NMR}$  (150 MHz,  $\text{CDCl}_3$ )  $\delta$  161.2, 135.4, 128.4, 127.5, 127.1 (t,  $J = 30.0$  Hz), 118.2 (qt,  $J = 285.0$ , 36.0 Hz), 114.3, 109.6 (tq,  $J = 252.0$ , 40.5 Hz), 55.6.  $^{19}\text{F NMR}$  (471 MHz,  $\text{CDCl}_3$ )  $\delta$  (-83.48)-(-84.02) (m), -107.28 (s). **HRMS** (ESI)  $m/z$  calcd. for  $\text{C}_{11}\text{H}_8\text{F}_5\text{N}_3\text{ONa}$   $[\text{M}+\text{Na}]^+$  316.0480, found 316.0472.

---

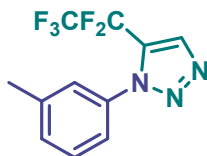

(59) Colorless oil;  $^1\text{H NMR}$  (600 MHz,  $\text{CDCl}_3$ )  $\delta$  8.08 (s, 1H), 7.43-7.37 (m, 2H), 7.29-7.24 (m, 2H), 2.44 (s, 3H).  $^{13}\text{C NMR}$  (150 MHz,  $\text{CDCl}_3$ )  $\delta$  139.6, 135.6, 135.4, 131.6, 129.0, 126.9 (t,  $J = 30.0$  Hz), 126.7, 123.2, 118.2 (qt,  $J = 283.5$ , 36.0 Hz), 109.5 (tq,  $J = 252.0$ , 40.5 Hz), 21.1.  $^{19}\text{F NMR}$  (471 MHz,  $\text{CDCl}_3$ )  $\delta$  (-83.44)-(-84.03) (m), (-106.90)-(-107.10) (m). **HRMS** (ESI)  $m/z$  calcd. for  $\text{C}_{11}\text{H}_8\text{F}_5\text{N}_3\text{Na}$   $[\text{M}+\text{Na}]^+$  300.0531, found 300.0524.

---

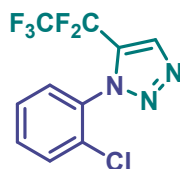

(60) Colorless oil;  $^1\text{H NMR}$  (600 MHz,  $\text{CDCl}_3$ )  $\delta$  8.14 (s, 1H), 7.61 (d,  $J = 7.8$  Hz, 1H), 7.57 (td,  $J = 7.2$ , 2.4 Hz, 1H), 7.49-7.43 (m, 2H).  $^{13}\text{C NMR}$  (150 MHz,  $\text{CDCl}_3$ )  $\delta$  135.1, 133.3, 132.6, 132.5,

130.5, 129.0, 127.8 (t,  $J = 28.5$  Hz), 127.4, 118.1 (qt,  $J = 283.5, 36.0$  Hz), 109.4 (tq,  $J = 252.0, 40.5$  Hz).  $^{19}\text{F}$  NMR (471 MHz,  $\text{CDCl}_3$ )  $\delta$  (-83.85)-(-84.40) (m), (-108.32)-(-110.83) (m). HRMS (ESI)  $m/z$  calcd. for  $\text{C}_{10}\text{H}_6\text{ClF}_5\text{N}_3$   $[\text{M}+\text{H}]^+$  298.0177, found 298.0170.

---

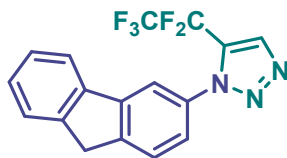

(61) White solid; mp: 120-121 °C;  $^1\text{H}$  NMR (600 MHz,  $\text{CDCl}_3$ )  $\delta$  8.13 (s, 1H), 7.88 (d,  $J = 7.8$  Hz, 1H), 7.83 (d,  $J = 7.8$  Hz, 1H), 7.61 (s, 1H), 7.58 (d,  $J = 7.2$  Hz, 1H), 7.46 (d,  $J = 7.8$  Hz, 1H), 7.42 (t,  $J = 7.2$  Hz, 1H), 7.38 (td,  $J = 7.8, 1.2$  Hz, 1H), 3.96 (s, 2H).  $^{13}\text{C}$  NMR (150 MHz,  $\text{CDCl}_3$ )  $\delta$  144.3, 144.0, 143.7, 139.9, 135.5, 133.8, 127.9, 127.1, 127.0 (t,  $J = 28.5$  Hz), 125.2, 125.0, 122.9, 120.6, 120.1, 118.2 (qt,  $J = 285.0, 36.0$  Hz), 109.6 (tq,  $J = 252.0, 40.5$  Hz), 36.8.  $^{19}\text{F}$  NMR (471 MHz,  $\text{CDCl}_3$ )  $\delta$  (-83.42)-(-83.86) (m), -106.93 (s). HRMS (ESI)  $m/z$  calcd. for  $\text{C}_{17}\text{H}_{11}\text{F}_5\text{N}_3$   $[\text{M}+\text{H}]^+$  352.0874, found 352.0873.

---

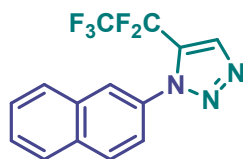

(62) White solid; mp: 62-63 °C;  $^1\text{H}$  NMR (600 MHz,  $\text{CDCl}_3$ )  $\delta$  8.16 (s, 1H), 8.02-7.98 (m, 2H), 7.97-7.91 (m, 2H), 7.66-7.59 (m, 2H), 7.54-7.50 (m, 1H).  $^{13}\text{C}$  NMR (150 MHz,  $\text{CDCl}_3$ )  $\delta$  135.6, 133.8, 133.0, 132.5, 129.4, 128.5, 128.0, 127.9, 127.6, 127.2 (t,  $J = 28.5$  Hz), 125.6, 123.1, 118.2 (qt,  $J = 285.0, 36.0$  Hz), 109.6 (tq,  $J = 252.0, 40.5$  Hz).  $^{19}\text{F}$  NMR (471 MHz,  $\text{CDCl}_3$ )  $\delta$  (-83.47)-(-83.84) (m), -106.88 (s). HRMS (ESI)  $m/z$  calcd. for  $\text{C}_{14}\text{H}_8\text{F}_5\text{N}_3\text{Na}$   $[\text{M}+\text{Na}]^+$  336.0531, found 336.0546.

---

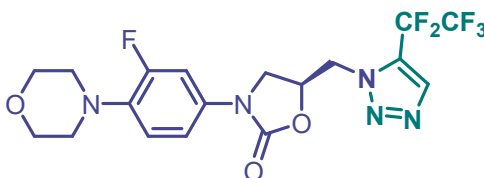

(63) White solid; mp: 152-153 °C;  $^1\text{H}$  NMR (600 MHz,  $\text{CDCl}_3$ )  $\delta$  8.01 (s, 1H), 7.39 (dd,  $J = 14.4, 2.4$  Hz, 1H), 7.08 (dd,  $J = 8.4, 1.8$  Hz, 1H), 6.91 (t,  $J = 9.0$  Hz, 1H), 5.24-5.19 (m, 1H), 4.85-4.74

(m, 2H), 4.22 (t,  $J = 9.0$  Hz, 1H), 4.01 (dd,  $J = 9.0, 6.0$  Hz, 1H), 3.84 (t,  $J = 4.8$  Hz, 4H), 3.03 (t,  $J = 4.8$  Hz, 4H).  $^{13}\text{C}$  NMR (150 MHz,  $\text{CDCl}_3$ )  $\delta$  155.5 (d,  $J = 246.0$  Hz), 153.1, 136.8 (d,  $J = 9.0$  Hz), 135.6, 132.4 (d,  $J = 10.5$  Hz), 126.7 (t,  $J = 28.5$  Hz), 118.8 (d,  $J = 4.5$  Hz), 118.0 (qt,  $J = 285.0, 36.0$  Hz), 114.1 (d,  $J = 3.0$  Hz), 109.8 (tq,  $J = 252.0, 42.0$  Hz), 107.6 (d,  $J = 26.0$  Hz), 69.6, 66.9, 52.1, 50.9 (d,  $J = 3.0$  Hz), 48.6.  $^{19}\text{F}$  NMR (471 MHz,  $\text{CDCl}_3$ )  $\delta$  (-83.81)-(-84.03) (m), -109.29 (s), (-119.89)-(-120.04) (m). HRMS (ESI)  $m/z$  calcd. for  $\text{C}_{18}\text{H}_{17}\text{F}_6\text{N}_5\text{O}_3$   $[\text{M}+\text{H}]^+$  466.1313, found 466.1314.

---

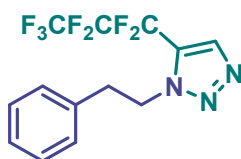

(64) Colorless oil;  $^1\text{H}$  NMR (600 MHz,  $\text{CDCl}_3$ )  $\delta$  7.95 (s, 1H), 7.32 (t,  $J = 7.2$  Hz, 2H), 7.27 (t,  $J = 7.2$  Hz, 1H), 7.18 (d,  $J = 7.2$  Hz, 2H), 4.66 (t,  $J = 8.0$  Hz, 2H), 2.96 (t,  $J = 8.0$  Hz, 2H).  $^{13}\text{C}$  NMR (150 MHz,  $\text{CDCl}_3$ )  $\delta$  136.2, 135.6, 128.9, 128.7, 127.3, 125.7 (t,  $J = 31.5$  Hz), 117.5 (qt,  $J = 287.0, 33.6$  Hz), 112.3 (tt,  $J = 253.0, 33.0$  Hz), 110.1-105.9 (m), 51.8, 36.7.  $^{19}\text{F}$  NMR (471 MHz,  $\text{CDCl}_3$ )  $\delta$  (-79.57)-(-80.20) (m), (-106.98)-(-107.38) (m), (-125.50)-(-125.79) (m). HRMS (ESI)  $m/z$  calcd. for  $\text{C}_{13}\text{H}_{11}\text{F}_7\text{N}_3$   $[\text{M}+\text{H}]^+$  342.0839, found 342.0841.

---

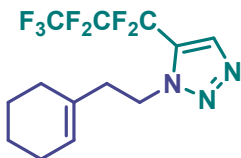

(65) Colorless oil;  $^1\text{H}$  NMR (600 MHz,  $\text{CDCl}_3$ )  $\delta$  7.90 (s, 1H), 5.38 (s, 1H), 4.49 (t,  $J = 7.2$  Hz, 2H), 2.54 (t,  $J = 7.8$  Hz, 2H), 1.99-1.87 (m, 4H), 1.64-1.57 (m, 2H), 1.54-1.47 (m, 2H).  $^{13}\text{C}$  NMR (150 MHz,  $\text{CDCl}_3$ )  $\delta$  135.5, 132.5, 125.5 (t,  $J = 30.0$  Hz), 124.9, 117.5 (qt,  $J = 288.0, 33.5$  Hz), 112.4 (tt,  $J = 255.0, 32.5$  Hz), 110.6-105.9 (m), 49.5, 38.7, 28.0, 25.1, 22.6, 21.9.  $^{19}\text{F}$  NMR (471 MHz,  $\text{CDCl}_3$ )  $\delta$  (-79.03)-(-80.71) (m), (-106.33)-(-108.24) (m), (-124.80)-(-126.64) (m). HRMS (ESI)  $m/z$  calcd. for  $\text{C}_{13}\text{H}_{15}\text{F}_7\text{N}_3$ .  $[\text{M}+\text{H}]^+$  346.1158, found 346.1154.

---

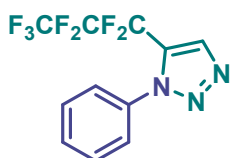

(66) Colorless oil;  $^1\text{H NMR}$  (600 MHz,  $\text{CDCl}_3$ )  $\delta$  8.10 (s, 1H), 7.58-7.54 (m, 1H), 7.53-7.49 (m, 2H), 7.43 (d,  $J = 7.8$  Hz, 2H).  $^{13}\text{C NMR}$  (150 MHz,  $\text{CDCl}_3$ )  $\delta$  135.8, 135.8, 130.8, 129.1, 127.1 (t,  $J = 30.0$  Hz), 126.3, 117.3 (qt,  $J = 287.0, 33.0$  Hz), 111.9 (tt,  $J = 255.0, 33.0$  Hz), 110.4-105.7 (m).  $^{19}\text{F NMR}$  (471 MHz,  $\text{CDCl}_3$ )  $\delta$  (-80.01)-(-80.36) (m), (-104.47)-(-104.77) (m), (-125.04)-(-125.43) (m). **HRMS** (ESI)  $m/z$  calcd. for  $\text{C}_{11}\text{H}_6\text{F}_7\text{N}_3\text{Na}$   $[\text{M}+\text{Na}]^+$  336.1686, found 336.1690.

---

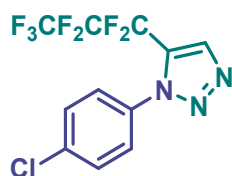

(67) White solid; mp: 44-45 °C;  $^1\text{H NMR}$  (600 MHz,  $\text{CDCl}_3$ )  $\delta$  8.11 (s, 1H), 7.54-7.50 (m, 2H), 7.39 (d,  $J = 8.4$  Hz, 2H).  $^{13}\text{C NMR}$  (150 MHz,  $\text{CDCl}_3$ )  $\delta$  137.2, 135.9, 134.2, 129.5, 127.6, 127.2 (t,  $J = 30.0$  Hz), 117.3 (qt,  $J = 286.5, 33.0$  Hz), 111.9 (tt,  $J = 253.5, 33.0$  Hz), 110.4-105.8 (m).  $^{19}\text{F NMR}$  (471 MHz,  $\text{CDCl}_3$ )  $\delta$  (-80.04)-(-80.16) (m), (-104.34)-(-104.80) (m), (-124.96)-(-125.33) (m). **HRMS** (ESI)  $m/z$  calcd. for  $\text{C}_{11}\text{H}_6\text{ClF}_7\text{N}_3$   $[\text{M}+\text{H}]^+$  348.0147, found 348.0138.

---

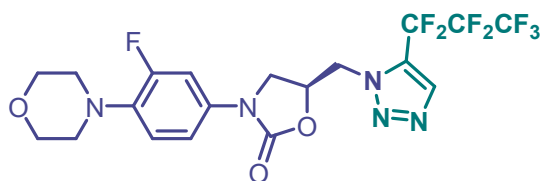

(68) White solid; mp: 158-159 °C;  $^1\text{H NMR}$  (600 MHz,  $\text{CDCl}_3$ )  $\delta$  8.01 (s, 1H), 7.38 (dd,  $J = 14.4, 2.4$  Hz, 1H), 7.07 (dd,  $J = 8.4, 1.8$  Hz, 1H), 6.90 (t,  $J = 9.0$  Hz, 1H), 5.24-5.18 (m, 1H), 4.83-4.71 (m, 2H), 4.22 (t,  $J = 9.0$  Hz, 1H), 4.04-3.99 (m, 1H), 3.84 (t,  $J = 4.8$  Hz, 4H), 3.03 (t,  $J = 4.8$  Hz, 4H).  $^{13}\text{C NMR}$  (150 MHz,  $\text{CDCl}_3$ )  $\delta$  155.4 (d,  $J = 246.0$  Hz), 154.6, 153.2, 136.8 (d,  $J = 9.0$  Hz), 136.0, 132.4 (d,  $J = 10.5$  Hz), 126.8 (t,  $J = 30.0$  Hz), 118.8 (d,  $J = 4.5$  Hz), 117.3 (qt,  $J = 286.5, 33.0$  Hz), 114.1 (d,  $J = 9.0$  Hz), 112.1 (tt,  $J = 253.5, 33.0$  Hz), 110.5-105.9 (m), 107.6 (d,  $J = 26.0$  Hz), 69.6, 66.8, 52.2, 50.9 (d,  $J = 3.0$  Hz), 48.7.  $^{19}\text{F NMR}$  (471 MHz,  $\text{CDCl}_3$ )  $\delta$  -79.72 (t,  $J = 10.8$  Hz), -107.04 (q,  $J = 10.4$  Hz), (-119.87)-(-120.14) (m), (-125.26)-(-125.73) (m). **HRMS** (ESI)  $m/z$  calcd. for  $\text{C}_{19}\text{H}_{18}\text{F}_8\text{N}_5\text{O}_3$   $[\text{M}+\text{H}]^+$  516.1279, found 516.1282.

---

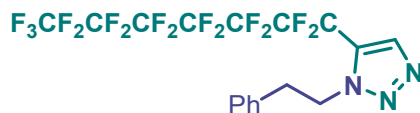



(69) White solid; mp: 40-41 °C; <sup>1</sup>H NMR (600 MHz, CDCl<sub>3</sub>) δ 7.95 (s, 1H), 7.34-7.30 (m, 2H), 7.29-7.25 (m, 1H), 7.19-7.16 (m, 2H), 4.68-4.64 (m, 2H), 3.32-3.28 (m, 2H). <sup>13</sup>C NMR (150 MHz, CDCl<sub>3</sub>) δ 136.3, 135.7, 128.9, 128.7, 127.3, 126.0 (t, *J* = 30.0 Hz), 117.1 (qt, *J* = 288.0, 33.0 Hz), 114.5-105.9 (m), 51.8, 36.8. <sup>19</sup>F NMR (471 MHz, CDCl<sub>3</sub>) δ -80.91 (t, *J* = 11.8 Hz), -106.48 (t, *J* = 15.5 Hz), (-121.86)-(-122.16) (m), (-122.61)-(-122.91) (m), (-126.03)-(-126.41) (m). HRMS (ESI) *m/z* calcd. for C<sub>17</sub>H<sub>11</sub>F<sub>15</sub>N<sub>3</sub>·[M+H]<sup>+</sup> 542.0710, found 542.0713.

---

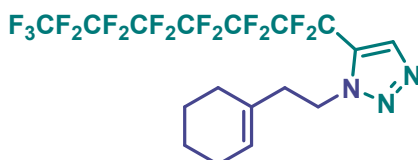

(70) White solid; mp: 38-39 °C; <sup>1</sup>H NMR (600 MHz, CDCl<sub>3</sub>) δ 7.92 (s, 1H), 5.43-5.39 (m, 1H), 4.51 (t, *J* = 7.8 Hz, 2H), 2.57 (t, *J* = 7.8 Hz, 2H), 2.00-1.90 (m, 4H), 1.66-1.60 (m, 2H), 1.56-1.50 (m, 2H). <sup>13</sup>C NMR (150 MHz, CDCl<sub>3</sub>) δ 135.6, 132.6, 125.8 (t, *J* = 30.0 Hz), 125.0, 117.1 (qt, *J* = 286.5, 33.0 Hz), 114.4-106.2 (m), 49.6, 38.8, 28.0, 25.1, 22.7, 22.0. <sup>19</sup>F NMR (471 MHz, CDCl<sub>3</sub>) δ -80.88 (t, *J* = 10.0 Hz), (-106.11)-(-106.57) (m), (-120.87)-(-121.50) (m), -122.00 (s), (-121.86)-(-121.14) (m), (-122.58)-(-122.90) (m), (-125.90)-(-126.47) (m). HRMS (ESI) *m/z* calcd. for C<sub>17</sub>H<sub>15</sub>F<sub>15</sub>N<sub>3</sub>·[M+H]<sup>+</sup> 546.1031, found 546.1026.

---

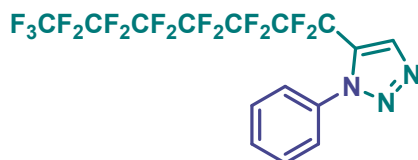

(71) Colorless oil; <sup>1</sup>H NMR (600 MHz, CDCl<sub>3</sub>) δ 8.12 (s, 1H), 7.62-7.58 (m, 1H), 7.57-7.53 (m, 2H), 7.45 (d, *J* = 7.8 Hz, 2H). <sup>13</sup>C NMR (150 MHz, CDCl<sub>3</sub>) δ 136.0, 135.8 130.9, 129.2, 127.5 (t, *J* = 31.5 Hz), 126.4, 119.0-103.2 (m). <sup>19</sup>F NMR (471 MHz, CDCl<sub>3</sub>) δ -80.77 (t, *J* = 11.3 Hz), -103.74 (t, *J* = 16.0 Hz), (-120.56)-(-120.87) (m), (-121.13)-(-121.56) (m), (-121.83)-(-121.14) (m), (-122.55)-(-122.92) (m), (-125.78)-(-126.52) (m). HRMS (ESI) *m/z* calcd. for C<sub>15</sub>H<sub>7</sub>F<sub>15</sub>N<sub>3</sub>·[M+H]<sup>+</sup> 514.0409, found 514.0400.

---

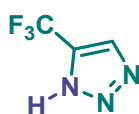

(72) White solid; mp: 37-38 °C; <sup>1</sup>H NMR (600 MHz, MeOD) δ 8.28 (s, 1H). <sup>13</sup>C NMR (150 MHz,

MeOD)  $\delta$  137.8 (q,  $J = 46.5$  Hz), 127.2, 121.2 (q,  $J = 266.5$  Hz).  $^{19}\text{F}$  NMR  $\delta$  (471 MHz, MeOD)  $\delta$  -62.4 (s). **HRMS** (ESI)  $m/z$  calcd. for  $\text{C}_3\text{H}_3\text{F}_3\text{N}_3$   $[\text{M}+\text{H}]^+$  138.0276, found 138.0279.

---

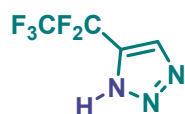

(73) White solid; mp: 33-34 °C;  $^1\text{H}$  NMR (600 MHz, MeOD)  $\delta$  8.32 (s, 1H).  $^{13}\text{C}$  NMR (150 MHz, MeOD)  $\delta$  136.3 (t,  $J = 28.0$  Hz), 128.5, 118.7 (qt,  $J = 285.0, 38.0$  Hz), 110.6 (tq,  $J = 249.0, 39.5$  Hz).  $^{19}\text{F}$  NMR  $\delta$  (471 MHz, MeOD)  $\delta$  -86.5 (s), -113.4 (s). **HRMS** (ESI)  $m/z$  calcd. for  $\text{C}_4\text{H}_3\text{F}_4\text{N}_3$   $[\text{M}+\text{H}]^+$  188.0254, found 188.0247.

---

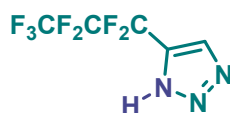

(74) White solid; mp: 41-42 °C;  $^1\text{H}$  NMR (600 MHz, MeOD)  $\delta$  8.29 (s, 1H).  $^{13}\text{C}$  NMR (150 MHz, MeOD)  $\delta$  136.3 (t,  $J = 29.5$  Hz), 128.7, 117.8 (qt,  $J = 286.0, 33.0$  Hz), 112.5 (tt,  $J = 251.0, 32.0$  Hz), 112.0-105.6 (m).  $^{19}\text{F}$  NMR  $\delta$  (471 MHz, MeOD)  $\delta$  (-81.84)-(-81.94) (m), (-110.92)-(-110.04) (m), (-128.51)-(-128.57) (m). **HRMS** (ESI)  $m/z$  calcd. for  $\text{C}_5\text{H}_3\text{F}_7\text{N}_3$   $[\text{M}+\text{H}]^+$  238.0223, found 238.0215.

---

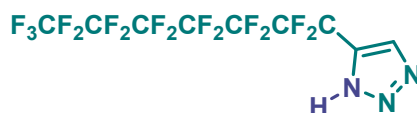

(75) White solid; mp: 73-74 °C;  $^1\text{H}$  NMR (600 MHz, MeOD)  $\delta$  8.31 (s, 1H).  $^{13}\text{C}$  NMR (150 MHz, MeOD)  $\delta$  136.5 (t,  $J = 30.0$  Hz), 128.8, 121.0-105.1 (m).  $^{19}\text{F}$  NMR  $\delta$  (471 MHz, MeOD)  $\delta$  (-82.49) - (-82.58) (m), (-122.36) - (-122.65) (m), (-123.00) - (-123.30) (m), (-123.69) - (-124.00) (m), (-127.33) - (-127.55) (m). **HRMS** (ESI)  $m/z$  calcd. for  $\text{C}_9\text{H}_3\text{F}_{15}\text{N}_3$   $[\text{M}+\text{H}]^+$  438.0096, found 438.0087.

---

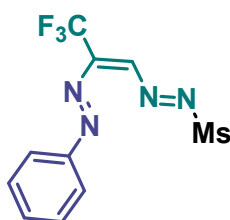

(77) Yellow solid; mp: 124-125 °C; <sup>1</sup>H NMR (600 MHz, MeOD) 7.78 (s, 1H), 7.33 (t, *J* = 7.8 Hz, 2H), 7.23 (d, *J* = 7.8 Hz, 2H), 7.04 (t, *J* = 7.2 Hz, 1H), 3.11 (s, 3H). <sup>13</sup>C NMR (150 MHz, MeOD) δ 142.3, 136.9, 129.2, 123.5, 122.1 (q, *J* = 270.0 Hz), 121.0 (q, *J* = 33.5 Hz), 114.2, 38.0. <sup>19</sup>F NMR (471 MHz, MeOD) δ -66.47 (s). HRMS (ESI) *m/z* calcd. for C<sub>9</sub>H<sub>10</sub>F<sub>3</sub>N<sub>4</sub>O<sub>2</sub>SNa [M+Na]<sup>+</sup> 329.2530, found 329.2533.

---

## References

- [1] a) X. Zhang, Z. Liu, X. Yang, Y. Dong, M. Virelli, G. Zanoni, E. A. Anderson, X. Bi, *Nat. Commun.* **2019**, *10*, 284–292; b) Y. Ning, Y. Gai, X. Zhang, Y. Dong, P. Sivaguru, Y. Wang, B. R. P. Reddy, G. Zanoni, X. Bi, *Angew. Chem. Int. Ed.* **2020**, *59*, 6473–6481; *Angew. Chem.* **2020**, *132*, 6535–6543.

## VI. X-ray single crystal data of 68 and 77

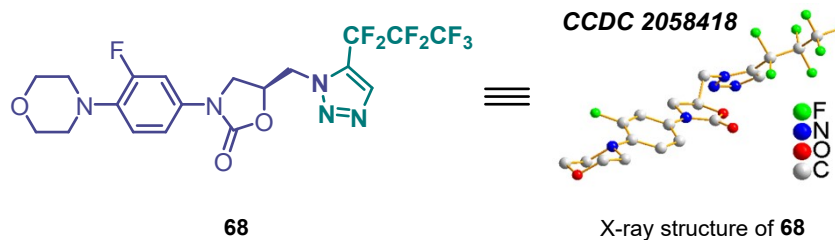

|                                   |                                                                                                                         |
|-----------------------------------|-------------------------------------------------------------------------------------------------------------------------|
| Empirical formula                 | C <sub>19</sub> H <sub>17</sub> F <sub>8</sub> N <sub>5</sub> O <sub>3</sub>                                            |
| Temperature                       | 298.15K                                                                                                                 |
| Wavelength                        | 0.71073 Å                                                                                                               |
| Unit cell dimensions              | a = 11.1446(13) Å    alpha = 90 deg.<br>b = 6.5924(9) Å    beta = 93.968(10) deg.<br>c = 29.135(4) Å    gamma = 90 deg. |
| Volume                            | 2135.4(5) Å <sup>3</sup>                                                                                                |
| Z                                 | 4                                                                                                                       |
| Calculated density                | 1.603 Mg/m <sup>3</sup>                                                                                                 |
| Absorption coefficient            | 0.157 mm <sup>-1</sup>                                                                                                  |
| F(000)                            | 1048.0                                                                                                                  |
| Crystal size                      | 0.2 × 0.19 × 0.18                                                                                                       |
| Theta range for data collection   | 7.168 to 58.424 deg                                                                                                     |
| Reflections collected / unique    | 4871 / 3460 [R <sub>int</sub> = 0.0230, R <sub>sigma</sub> = 0.0502]                                                    |
| Data / restraints / parameters    | 3460 / 1 / 316                                                                                                          |
| Goodness-of-fit on F <sup>2</sup> | 1.015                                                                                                                   |
| Final R indices [I > 2sigma(I)]   | R <sub>1</sub> = 0.0646, wR <sub>2</sub> = 0.1551                                                                       |
| R indices (all data)              | R <sub>1</sub> = 0.0970, wR <sub>2</sub> = 0.1818                                                                       |

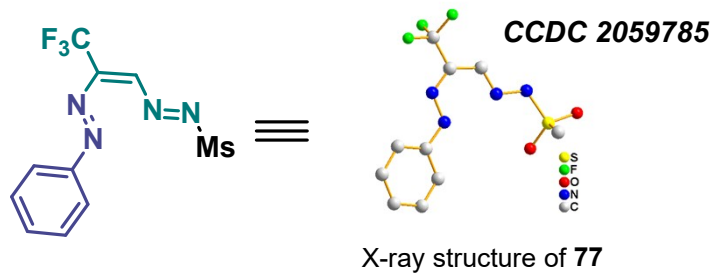

|                                   |                                                                                                                |
|-----------------------------------|----------------------------------------------------------------------------------------------------------------|
| Empirical formula                 | C <sub>10</sub> H <sub>9</sub> F <sub>3</sub> N <sub>4</sub> O <sub>2</sub> S                                  |
| Temperature                       | 298.15K                                                                                                        |
| Wavelength                        | 0.71073 Å                                                                                                      |
| Unit cell dimensions              | a = 5.2381(9) Å    alpha = 90 deg.<br>b = 9.2372(19) Å    beta = 90 deg.<br>c = 28.525(5) Å    gamma = 90 deg. |
| Volume                            | 1380.2(4) Å <sup>3</sup>                                                                                       |
| Z                                 | 4                                                                                                              |
| Calculated density                | 1.47 Mg/m <sup>3</sup>                                                                                         |
| Absorption coefficient            | 0.275 mm <sup>-1</sup>                                                                                         |
| F(000)                            | 624.0                                                                                                          |
| Crystal size                      | 0.2 × 0.19 × 0.18                                                                                              |
| Theta range for data collection   | 7.218 to 58.622 deg                                                                                            |
| Reflections collected / unique    | 4410 / 2801 [R <sub>int</sub> = 0.0411, R <sub>sigma</sub> = 0.0929]                                           |
| Data / restraints / parameters    | 2801/0/182                                                                                                     |
| Goodness-of-fit on F <sup>2</sup> | 1.003                                                                                                          |
| Final R indices [I > 2σ(I)]       | R <sub>1</sub> = 0.0662, wR <sub>2</sub> = 0.1236                                                              |
| R indices (all data)              | R <sub>1</sub> = 0.1326, wR <sub>2</sub> = 0.1555                                                              |

## VII. Copies of NMR spectra

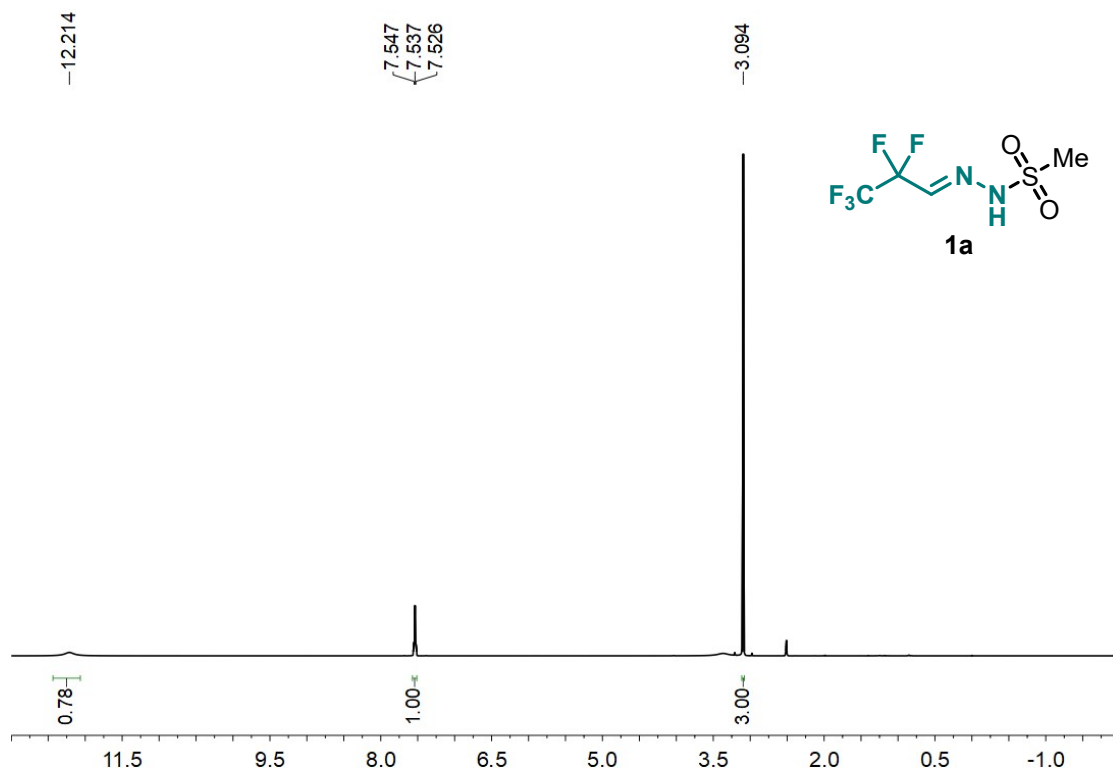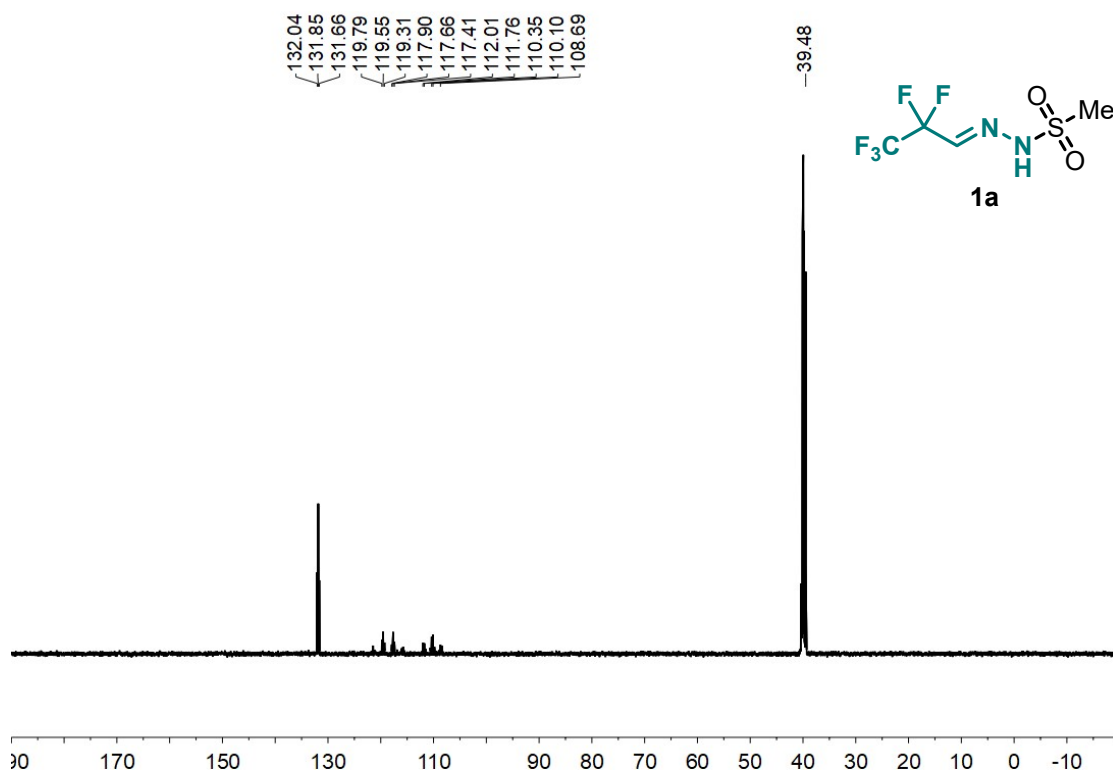

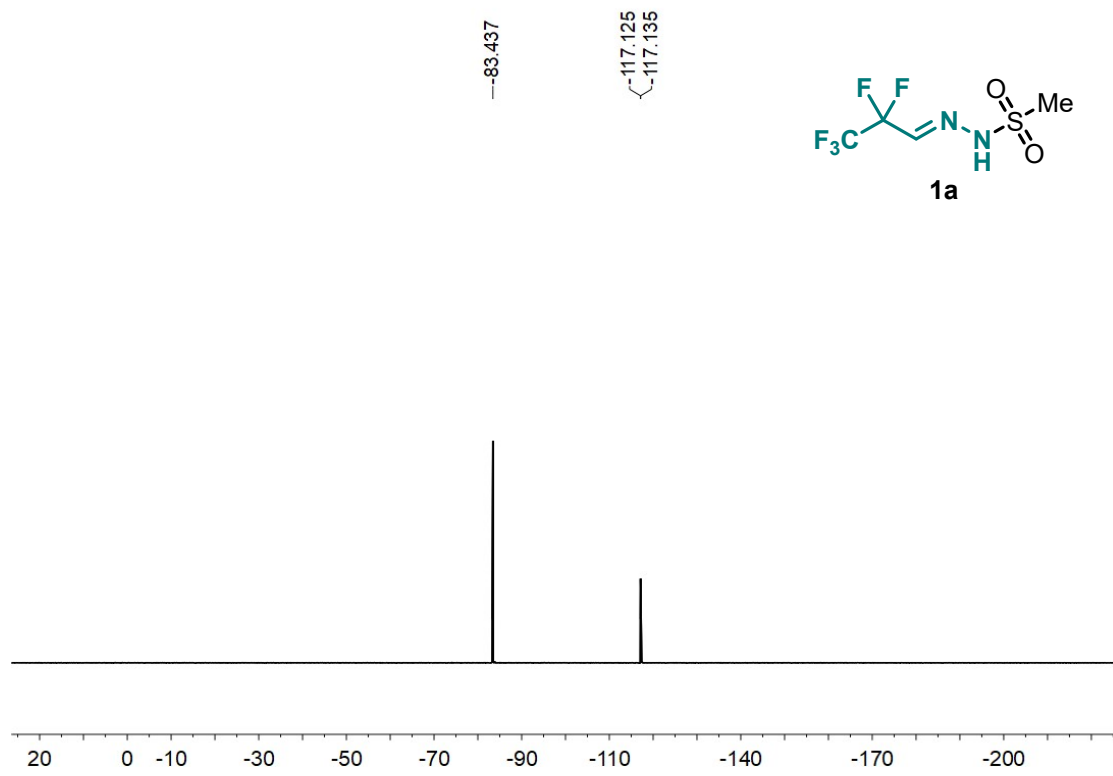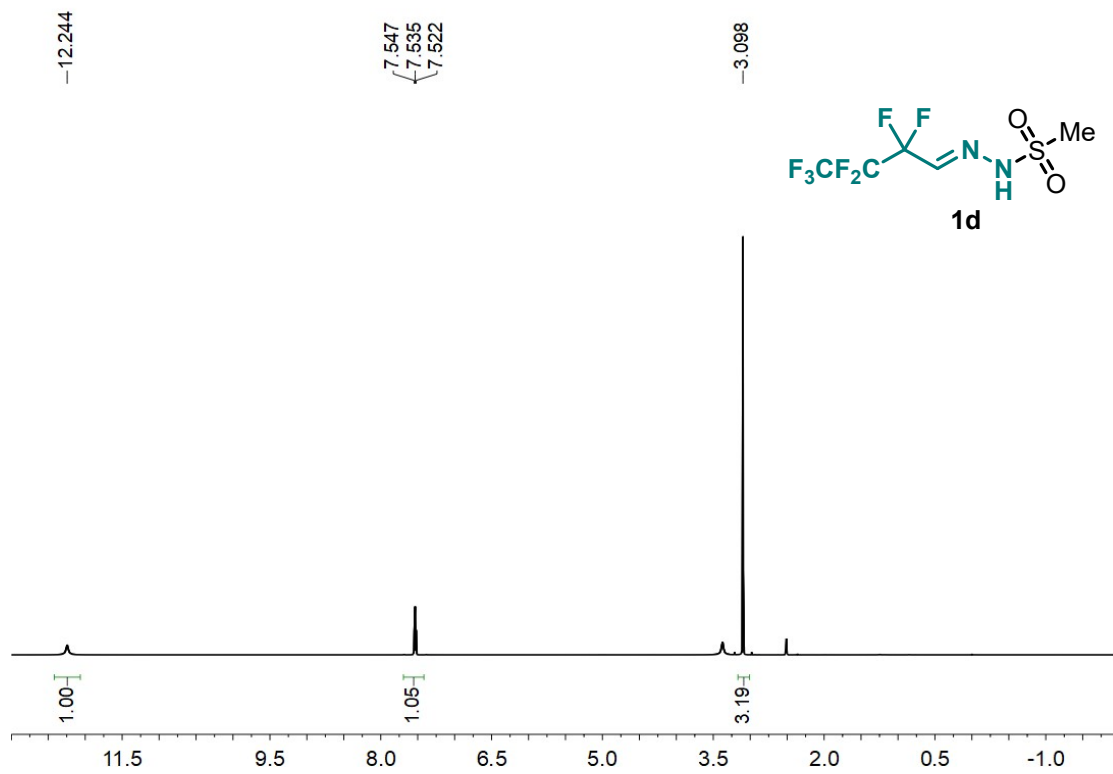

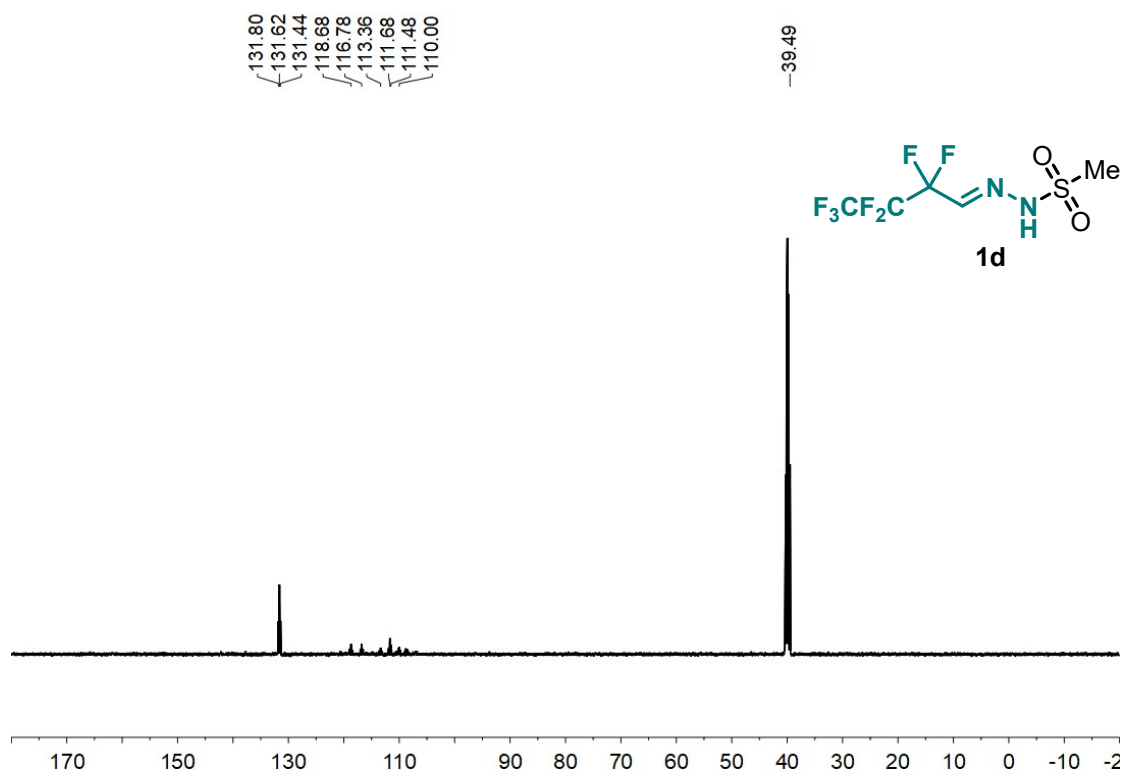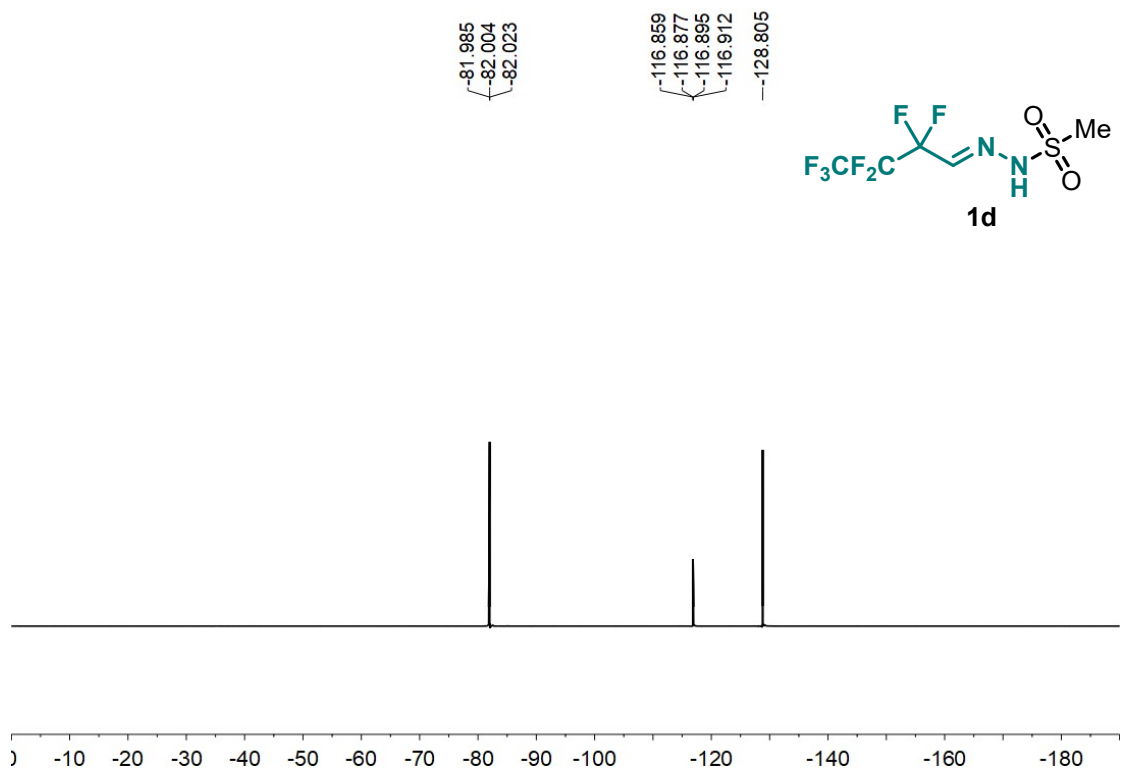



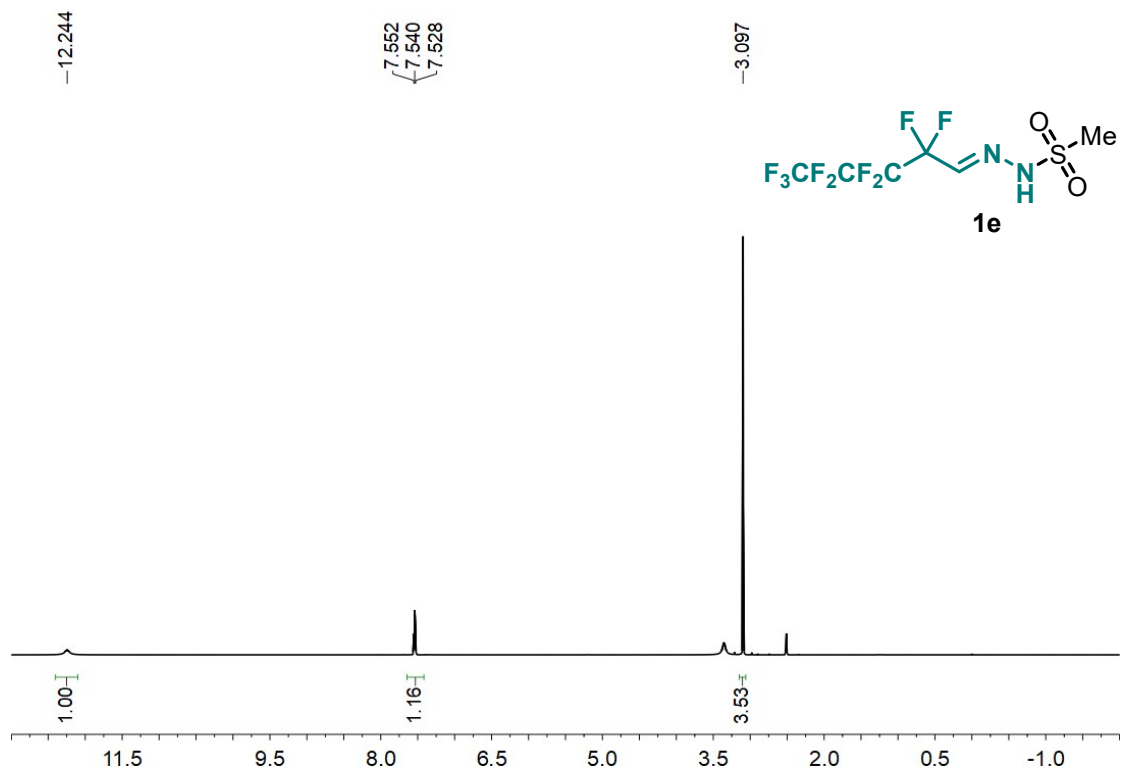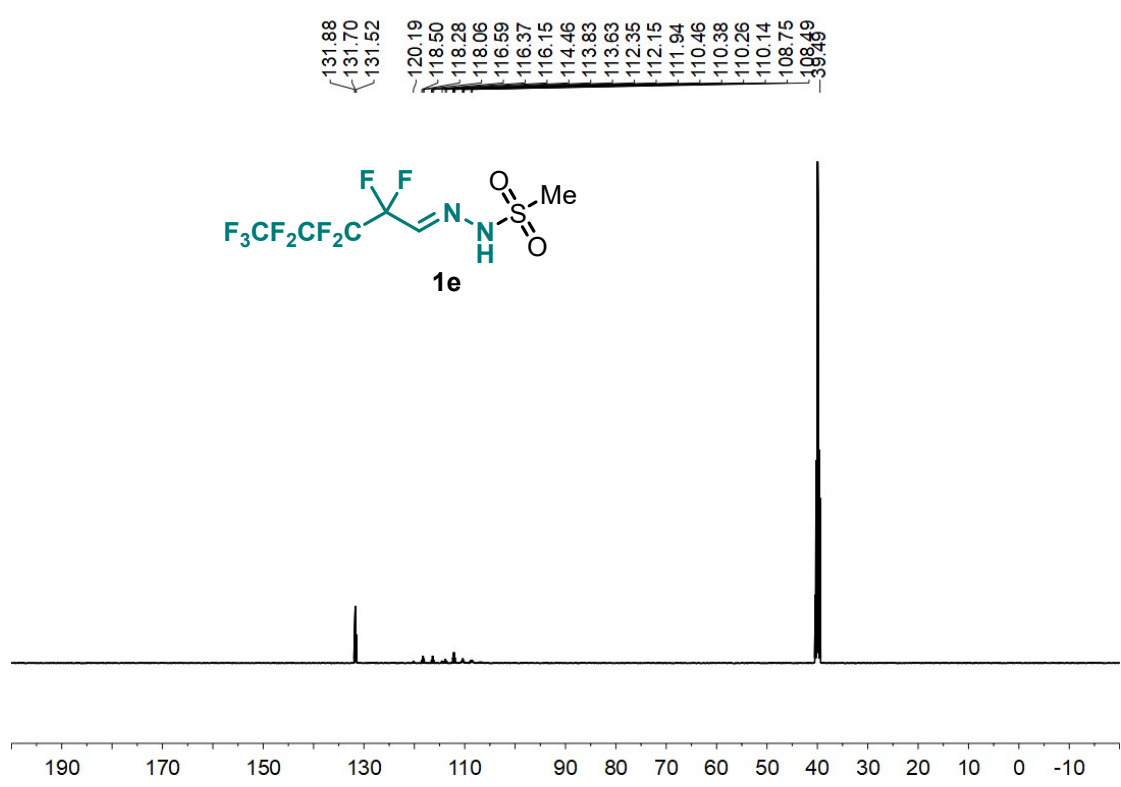

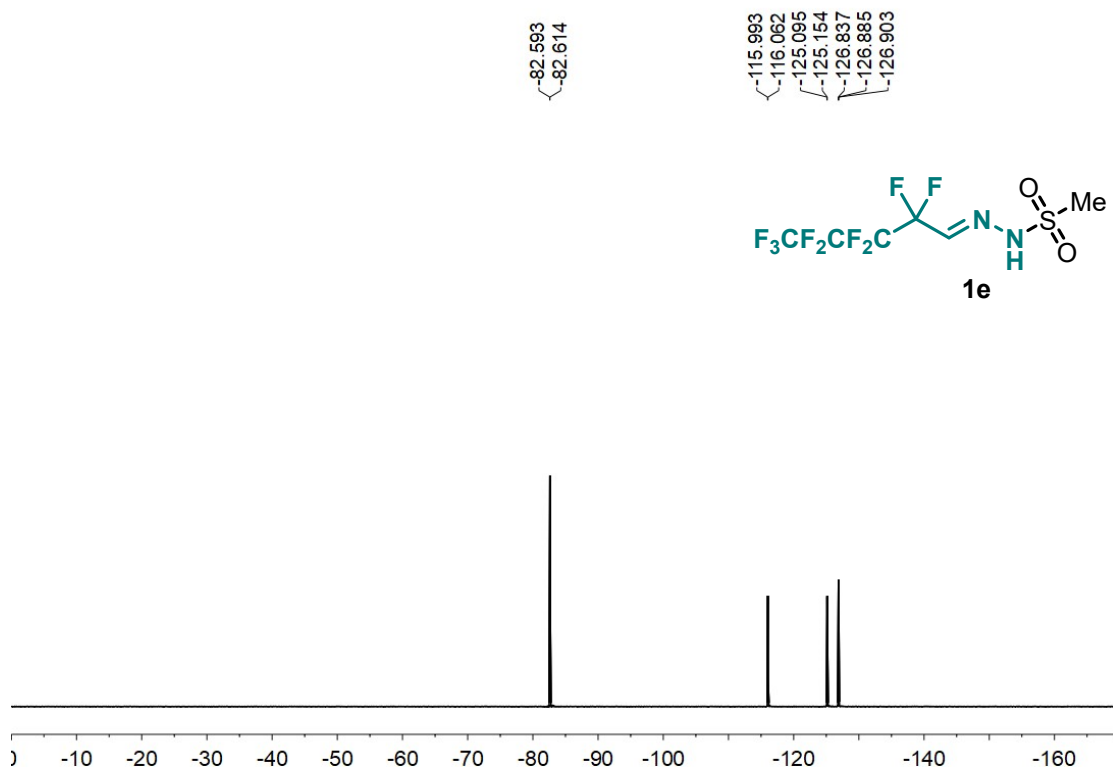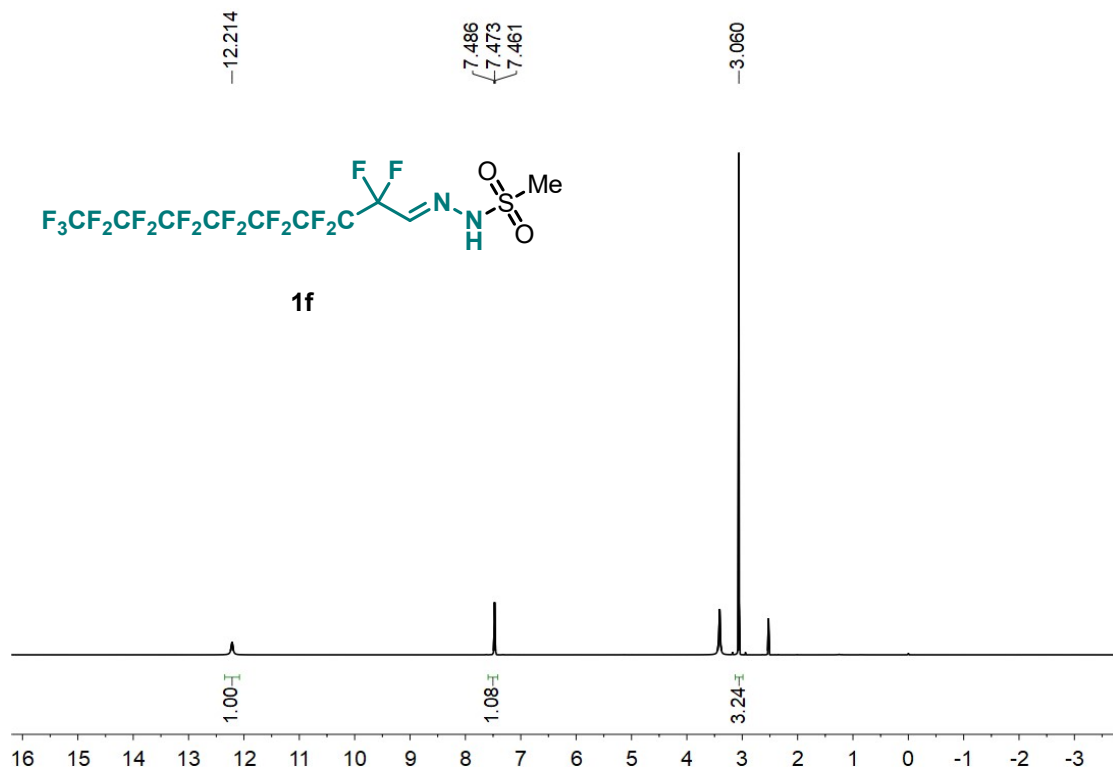

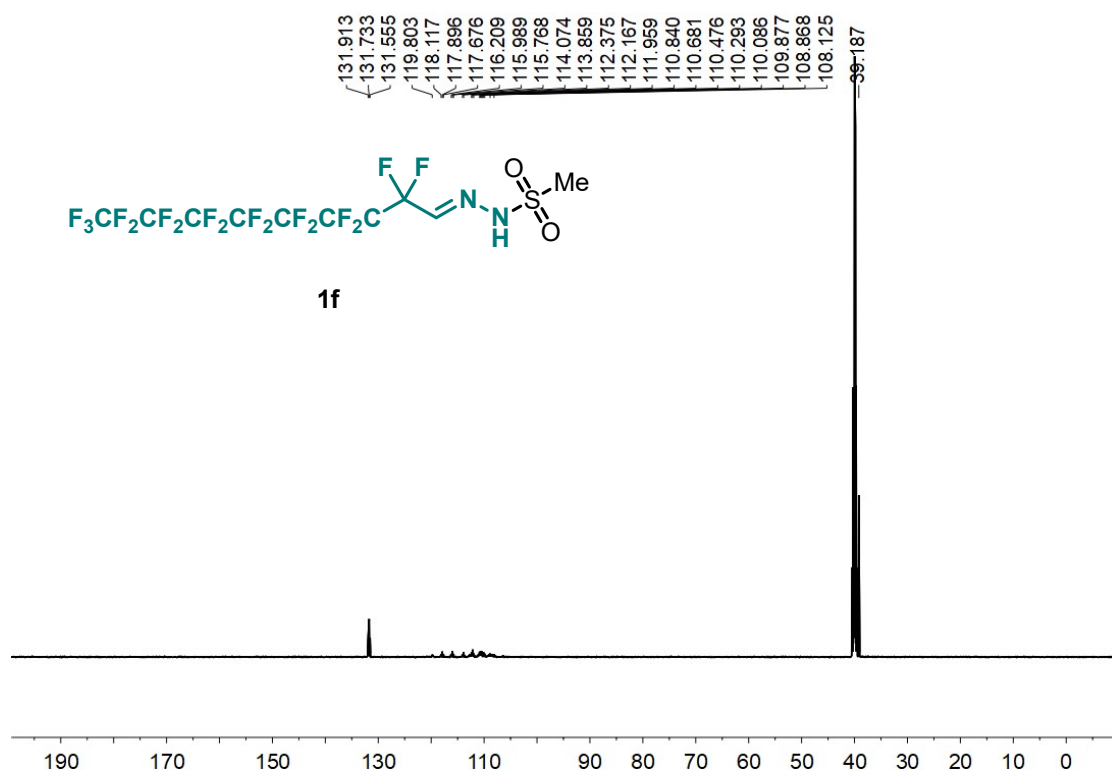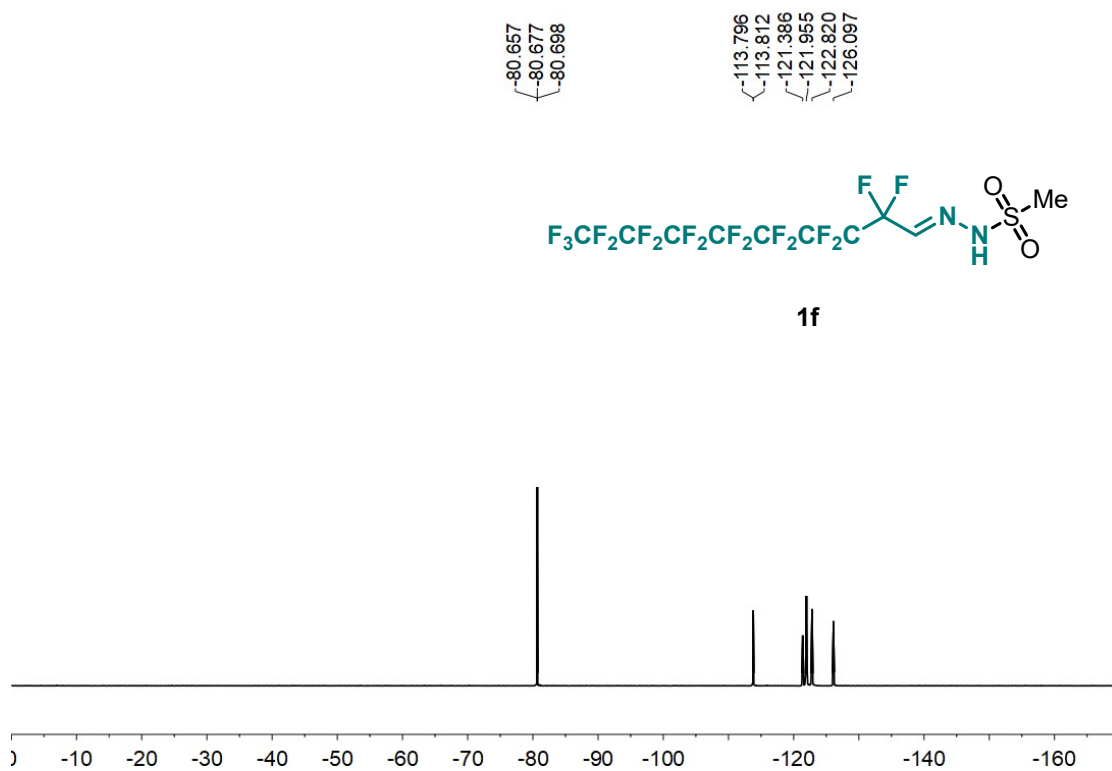

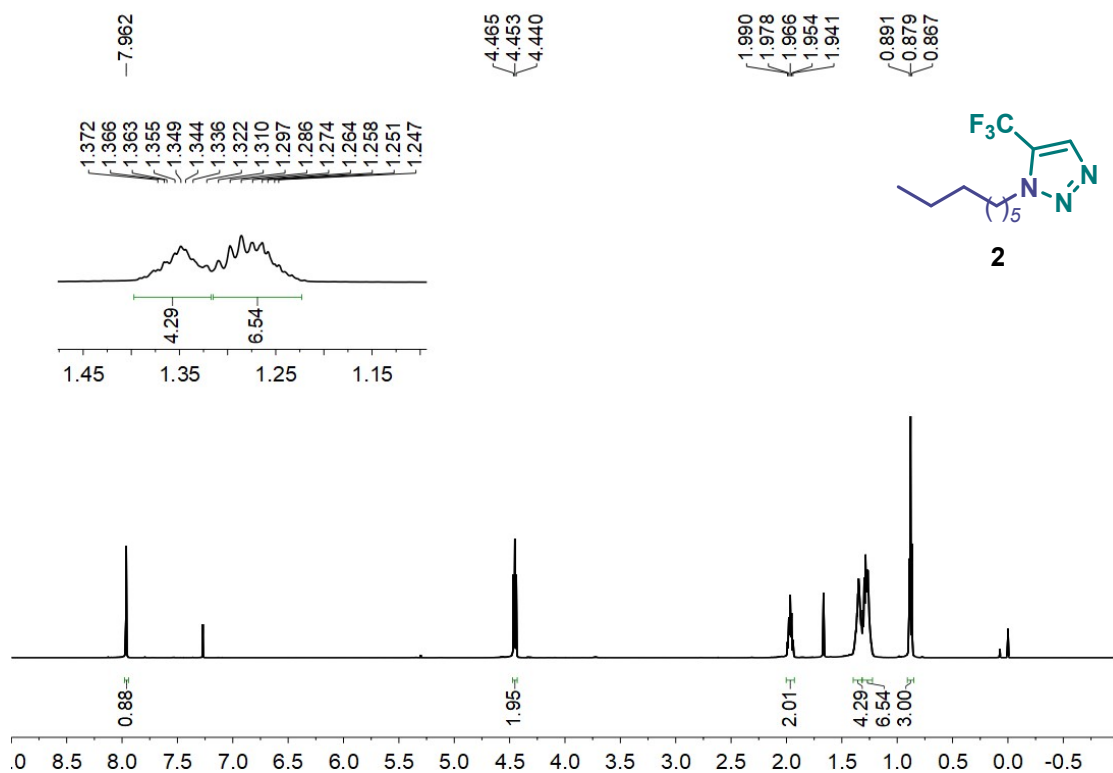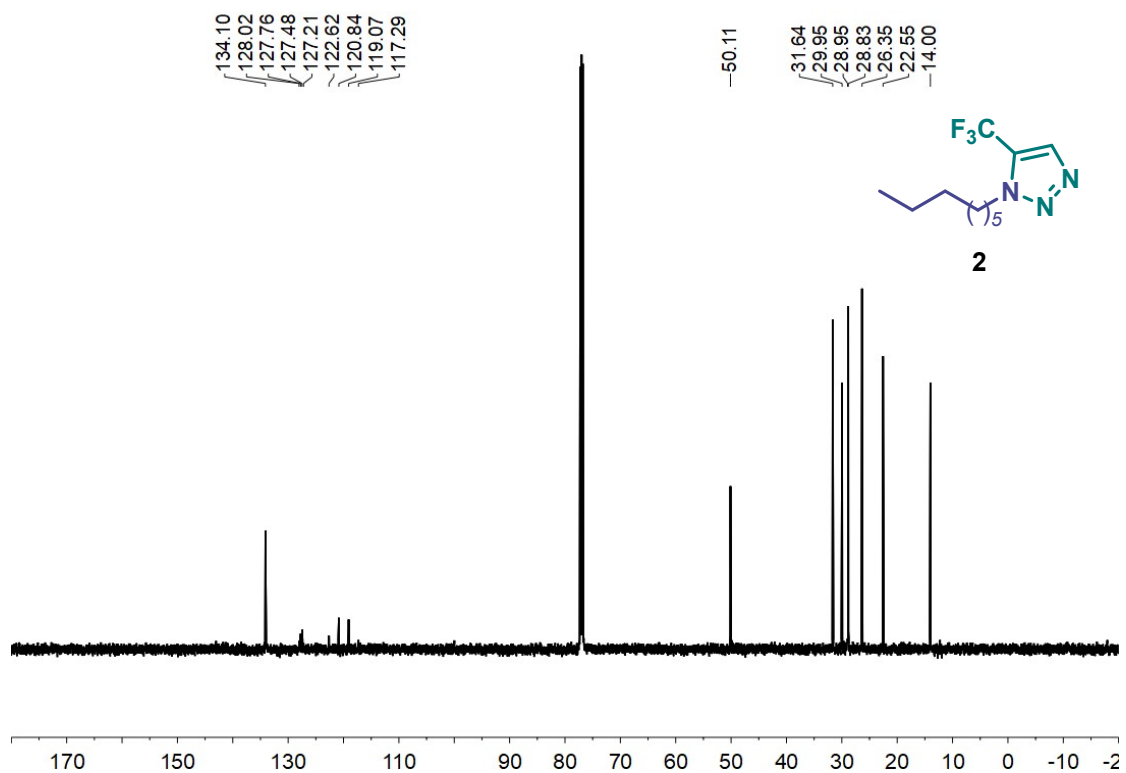

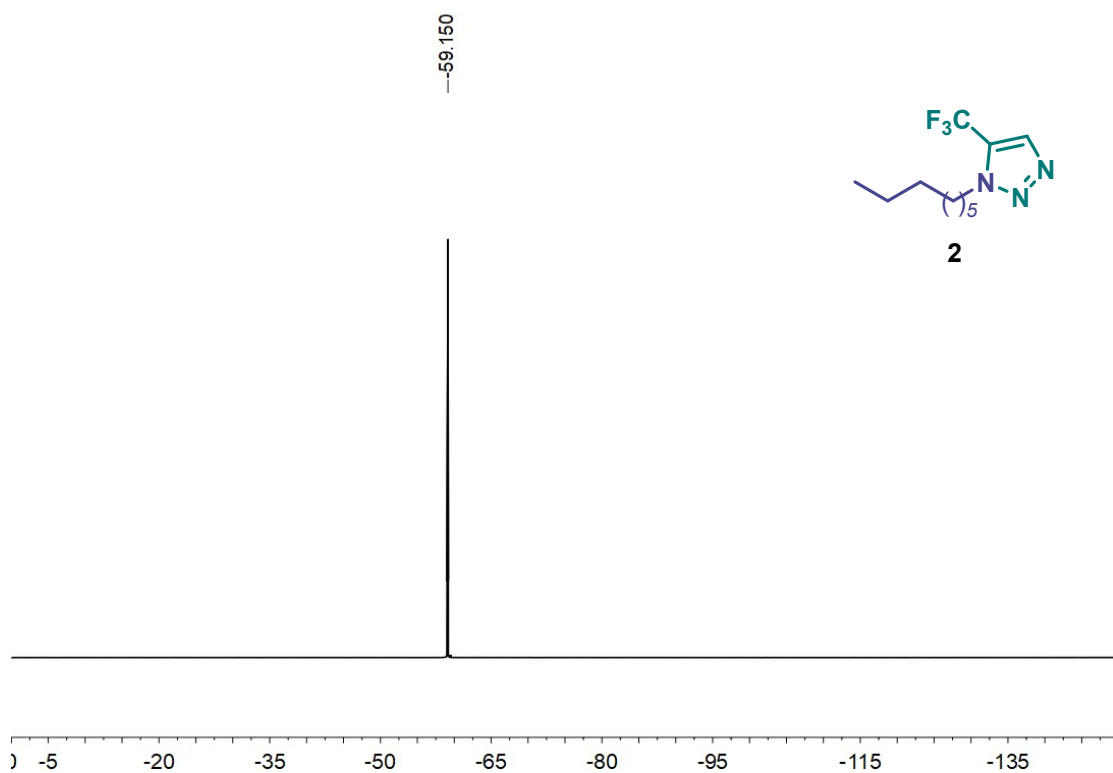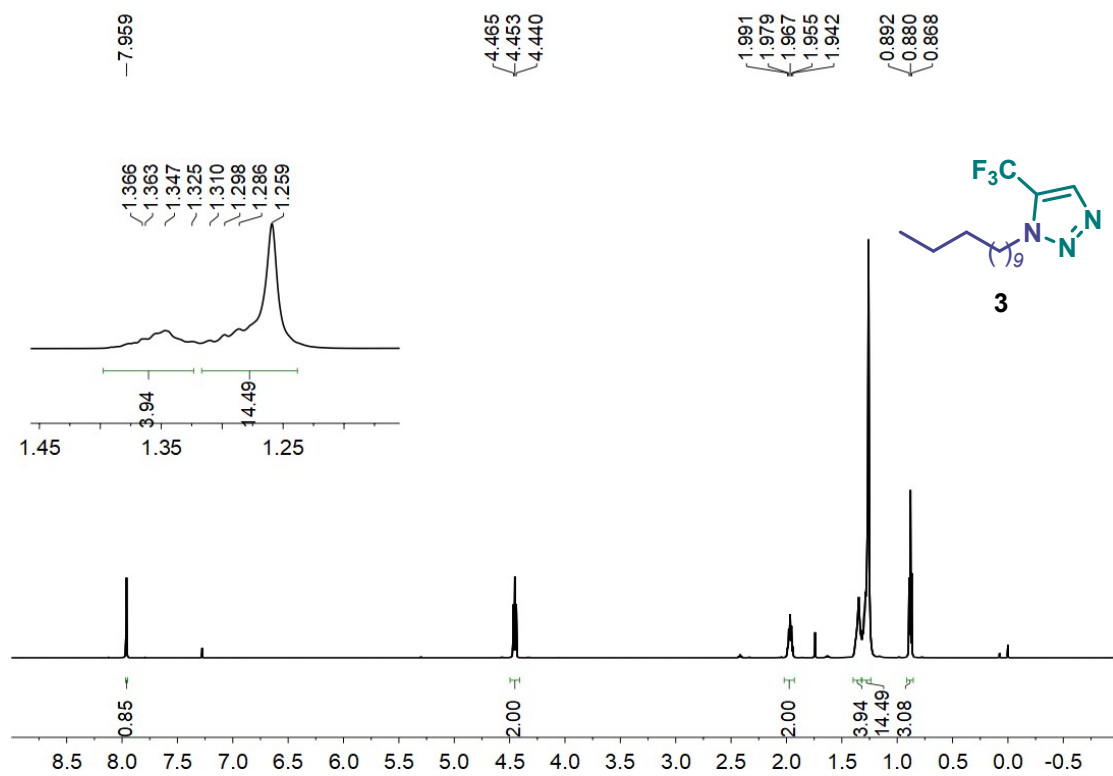

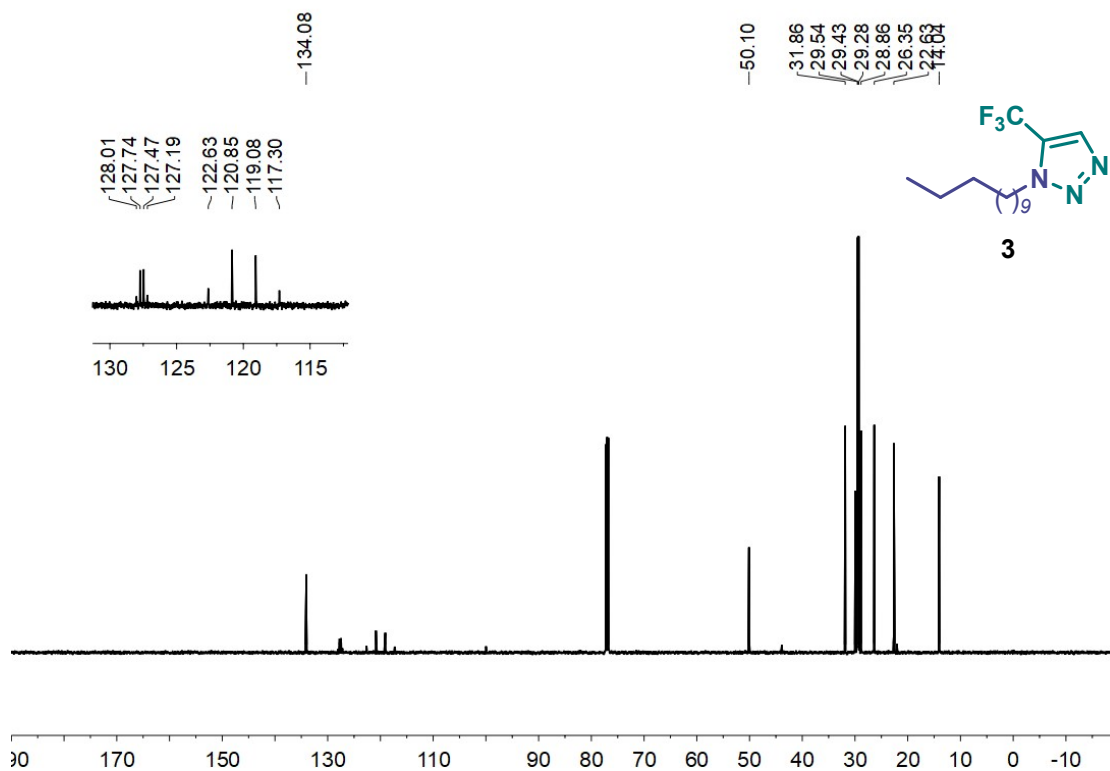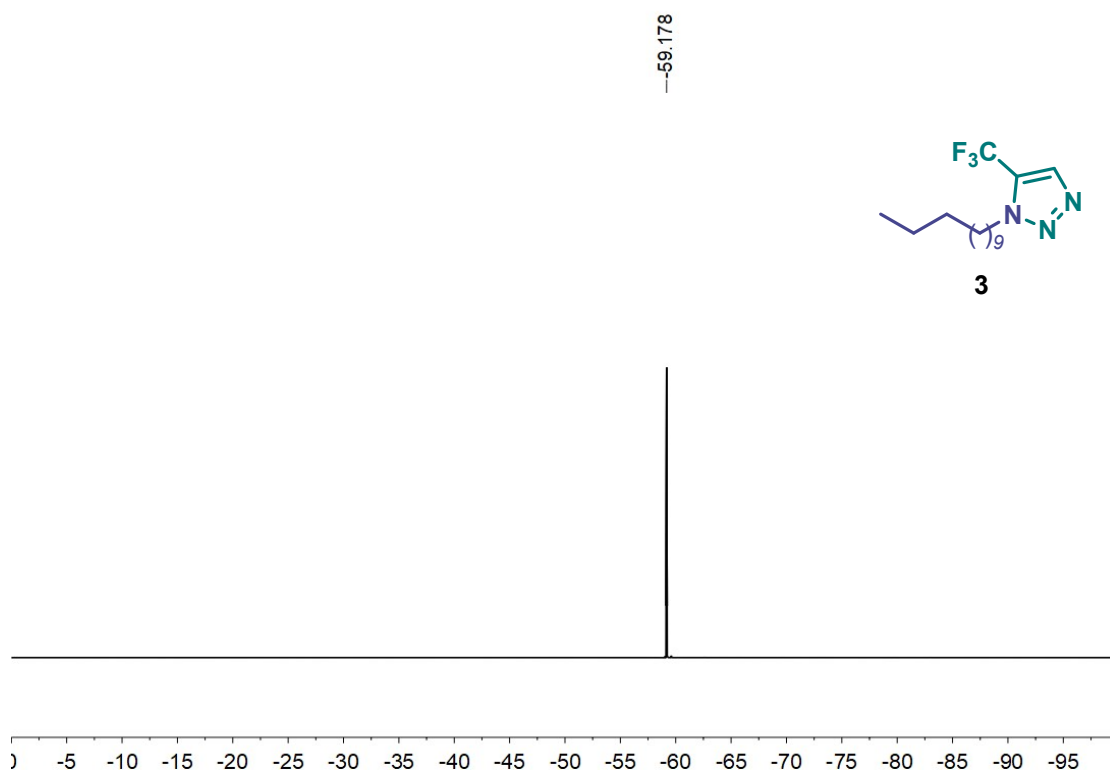

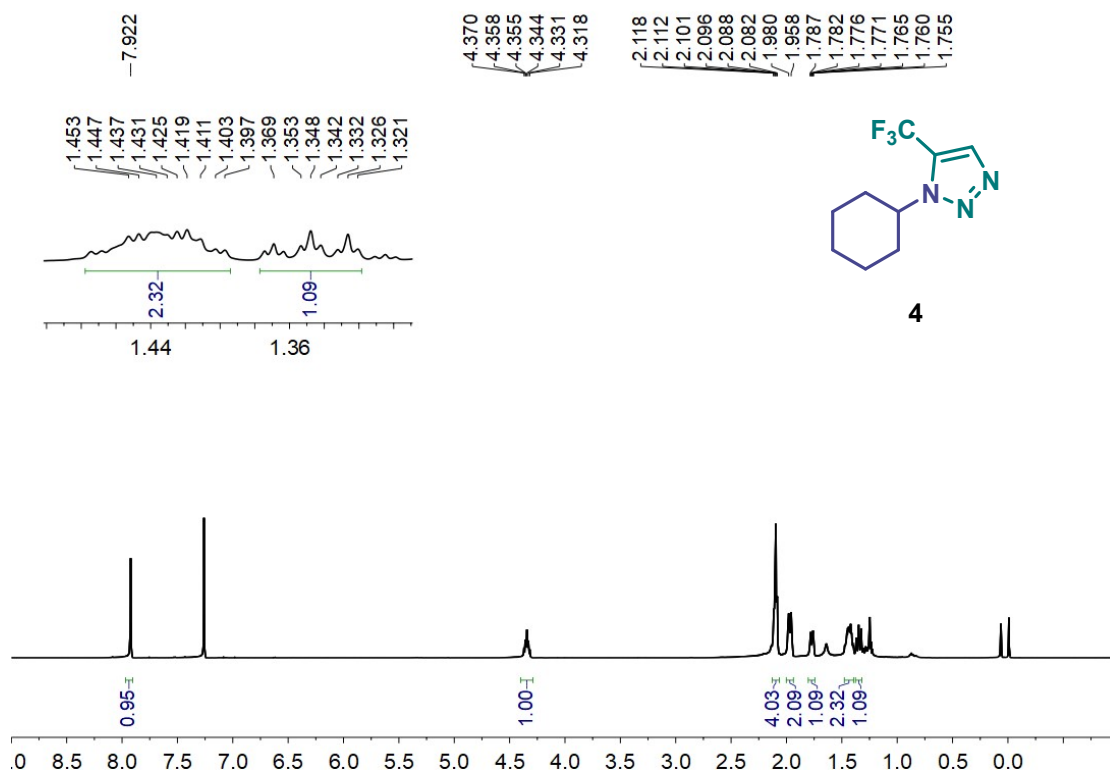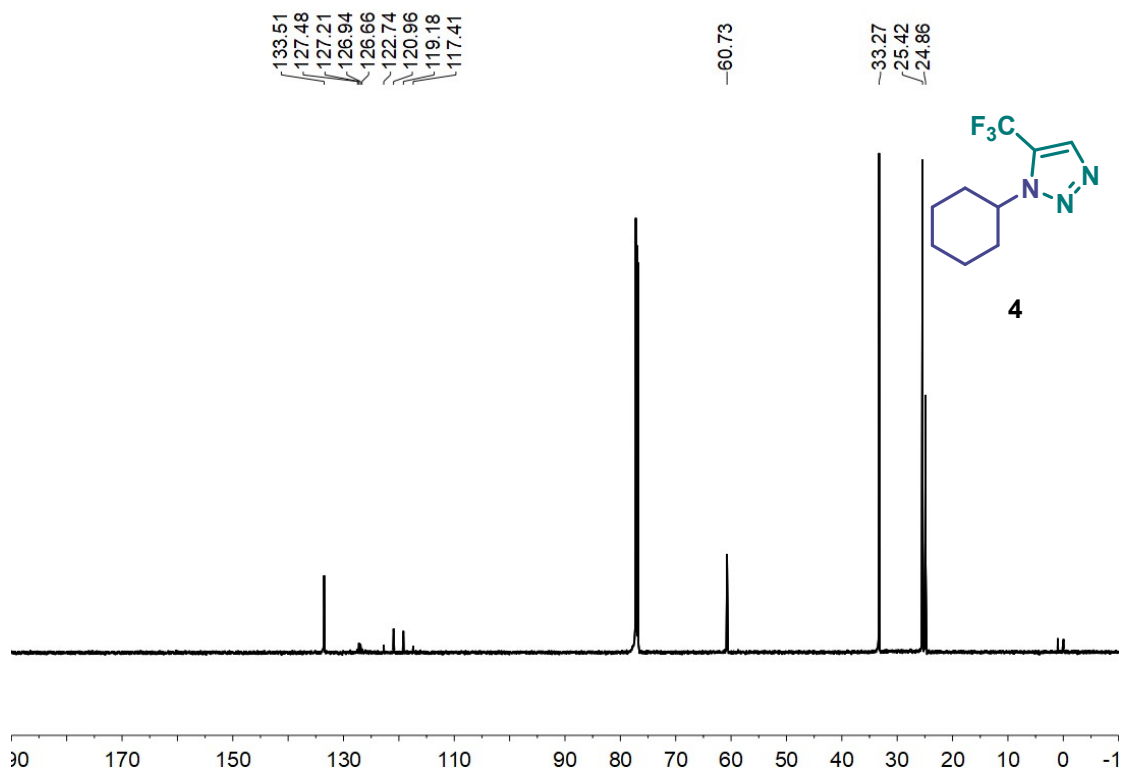

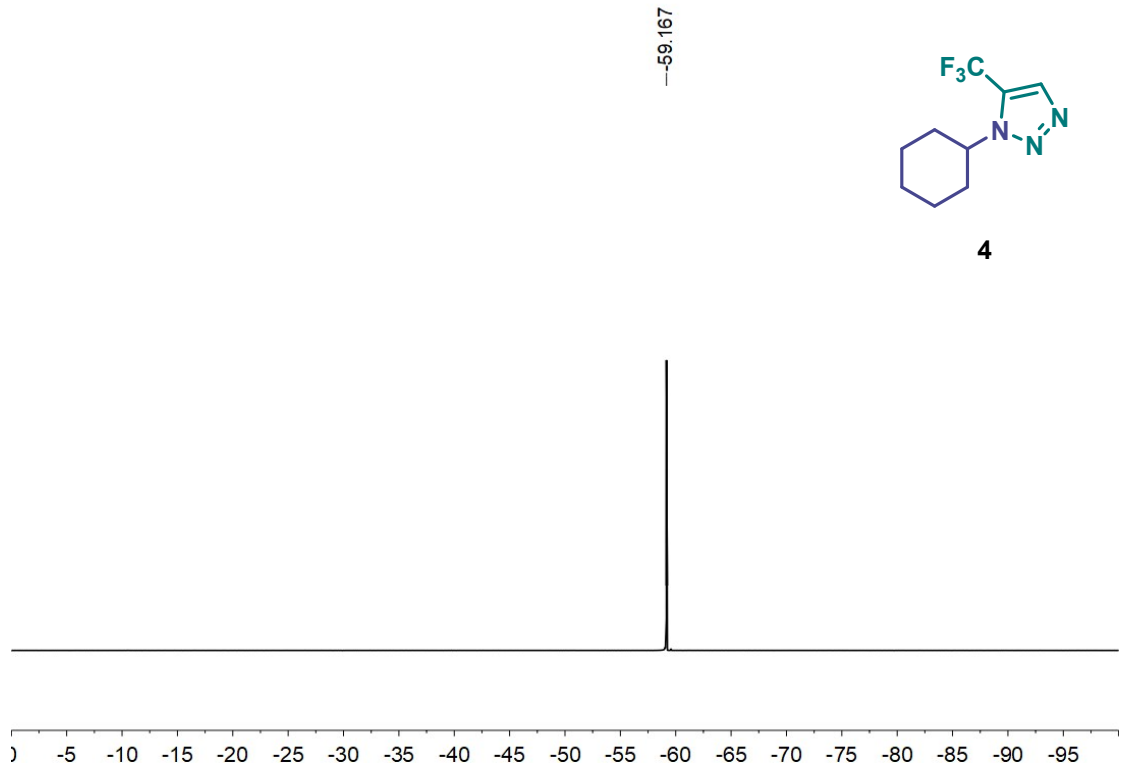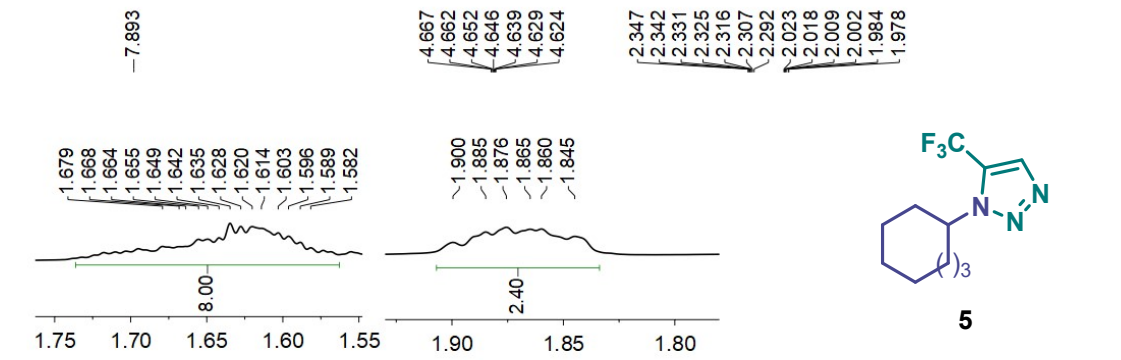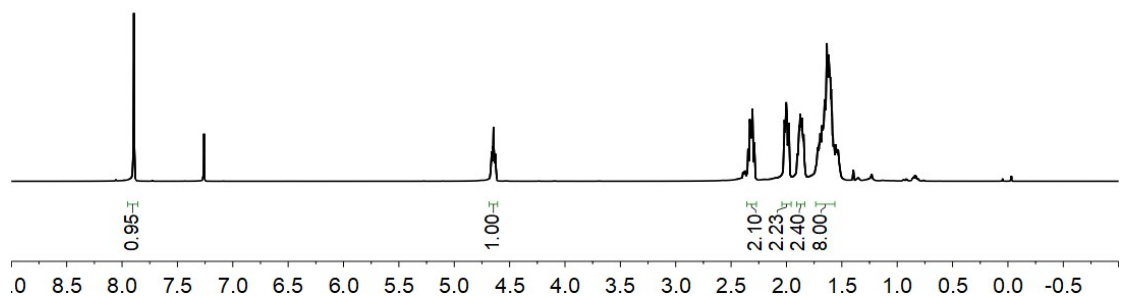



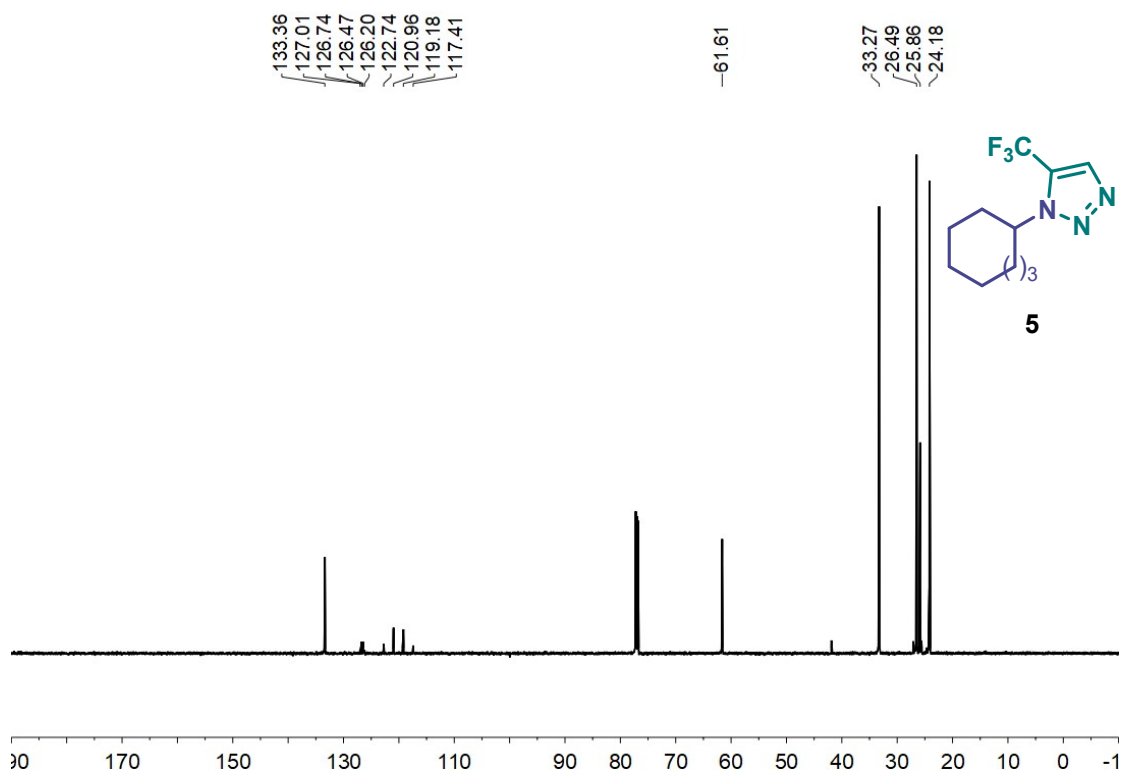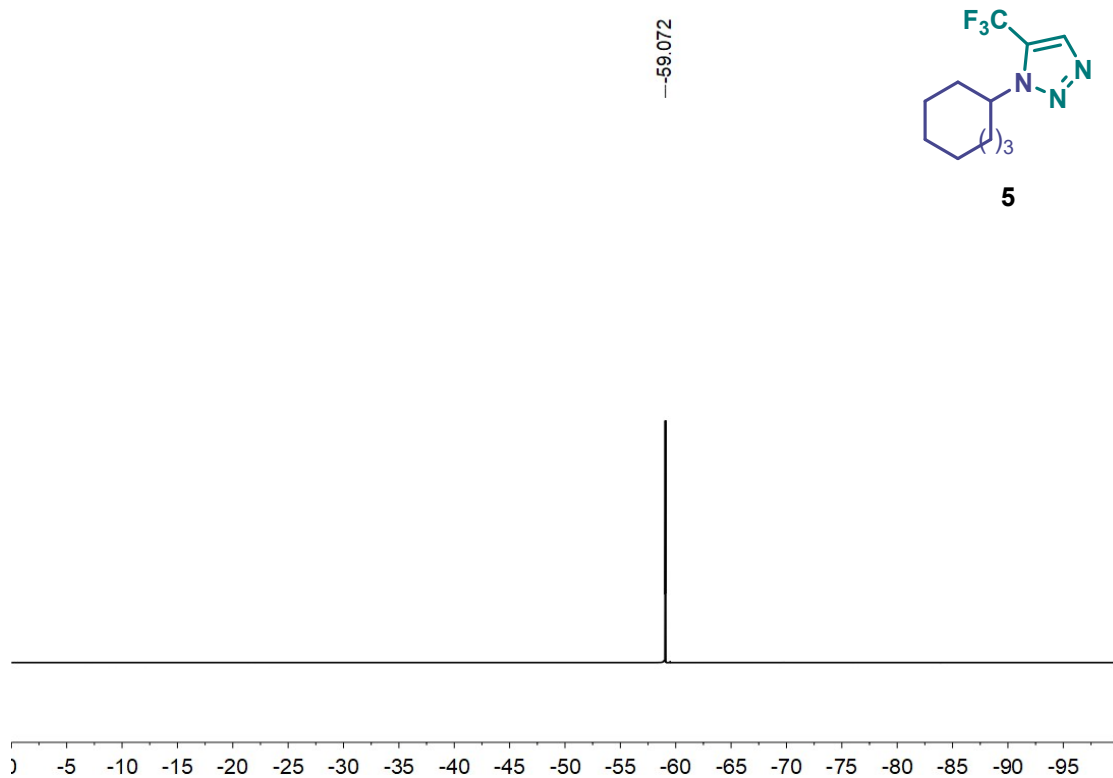

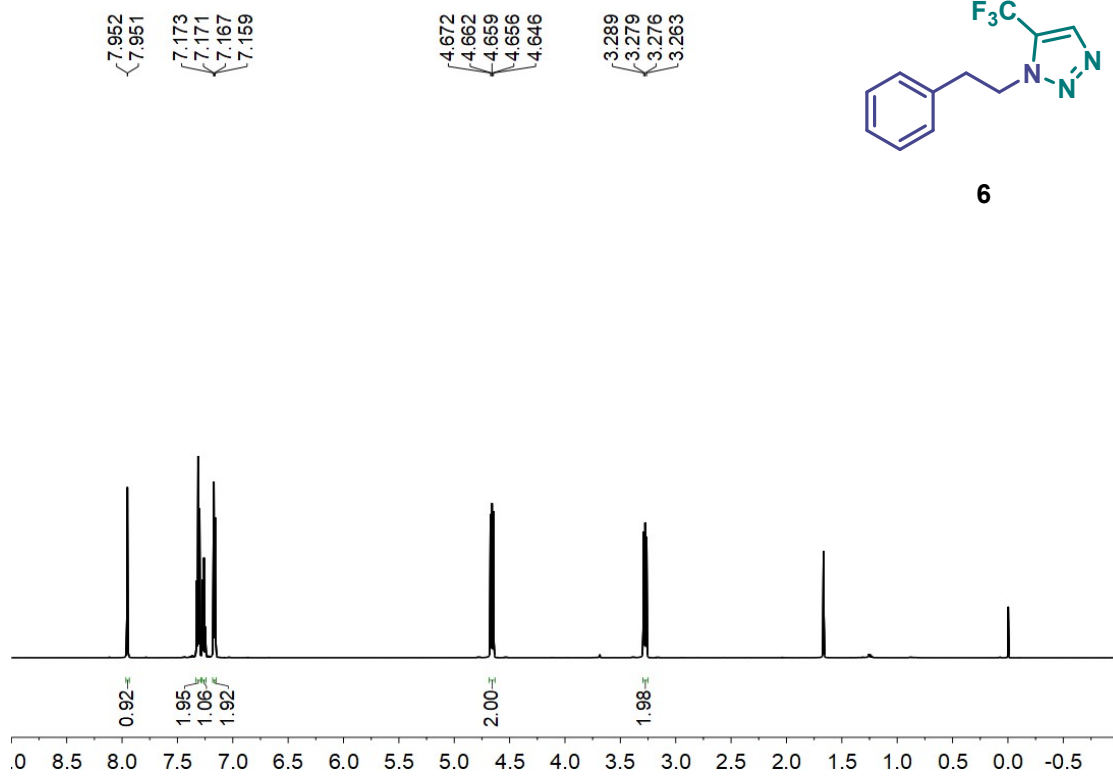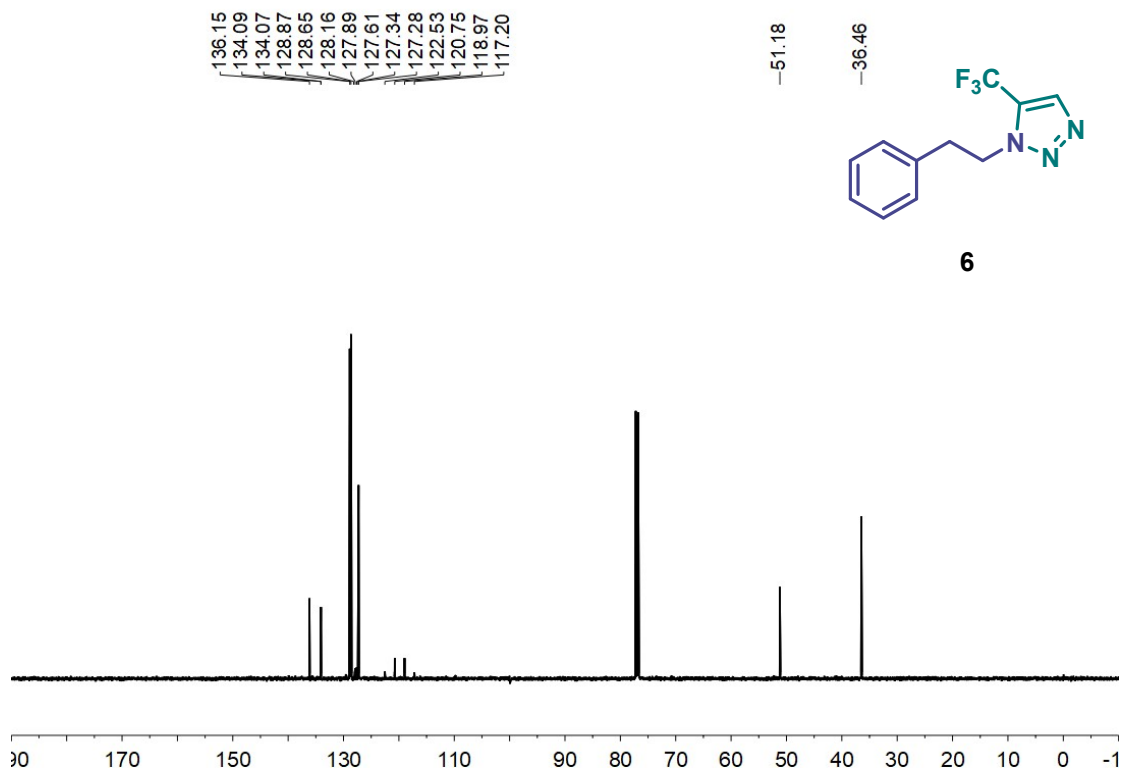

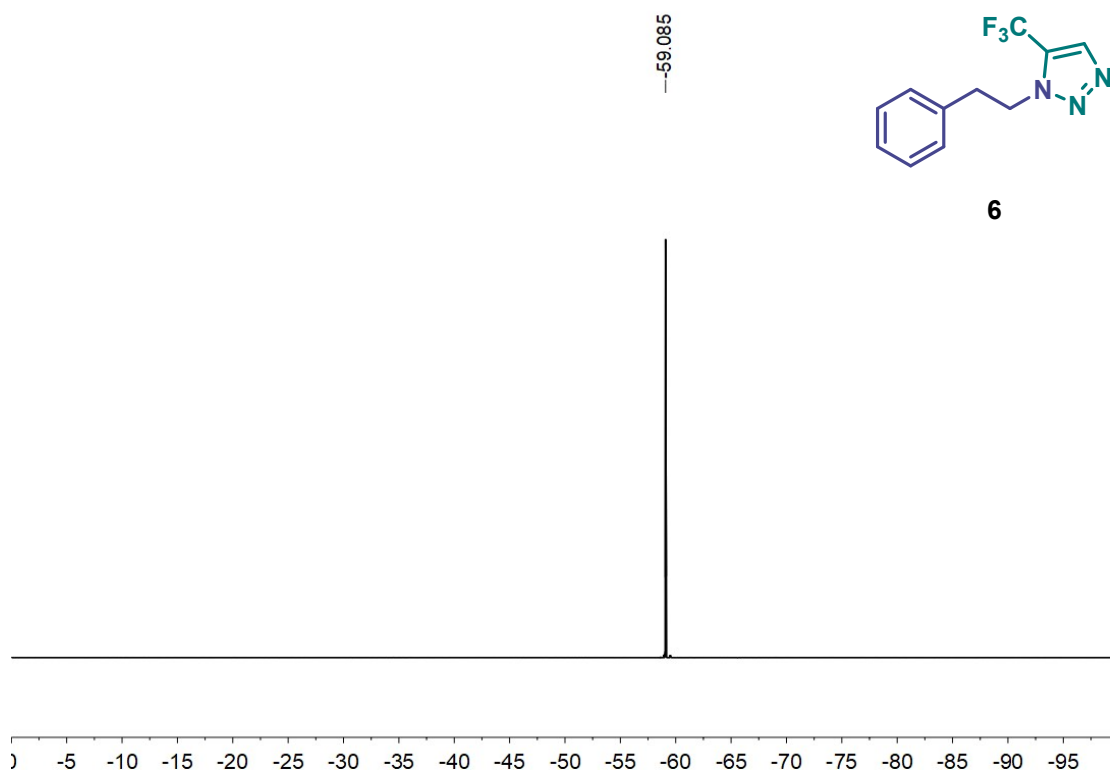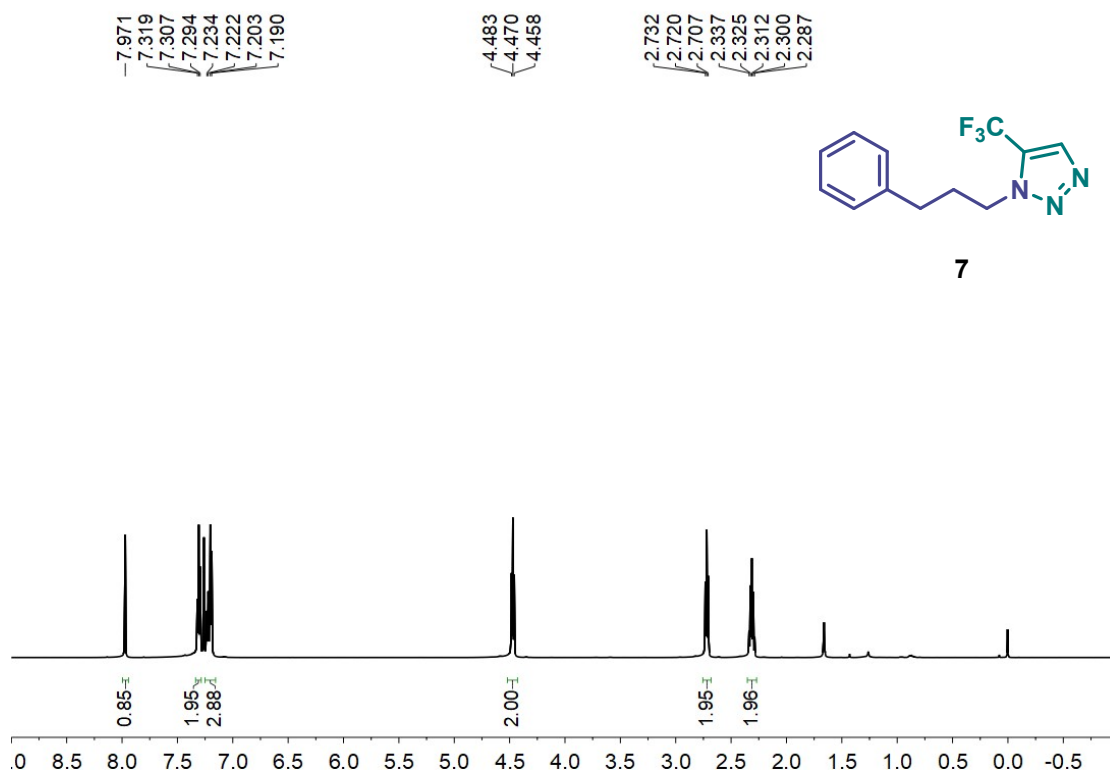

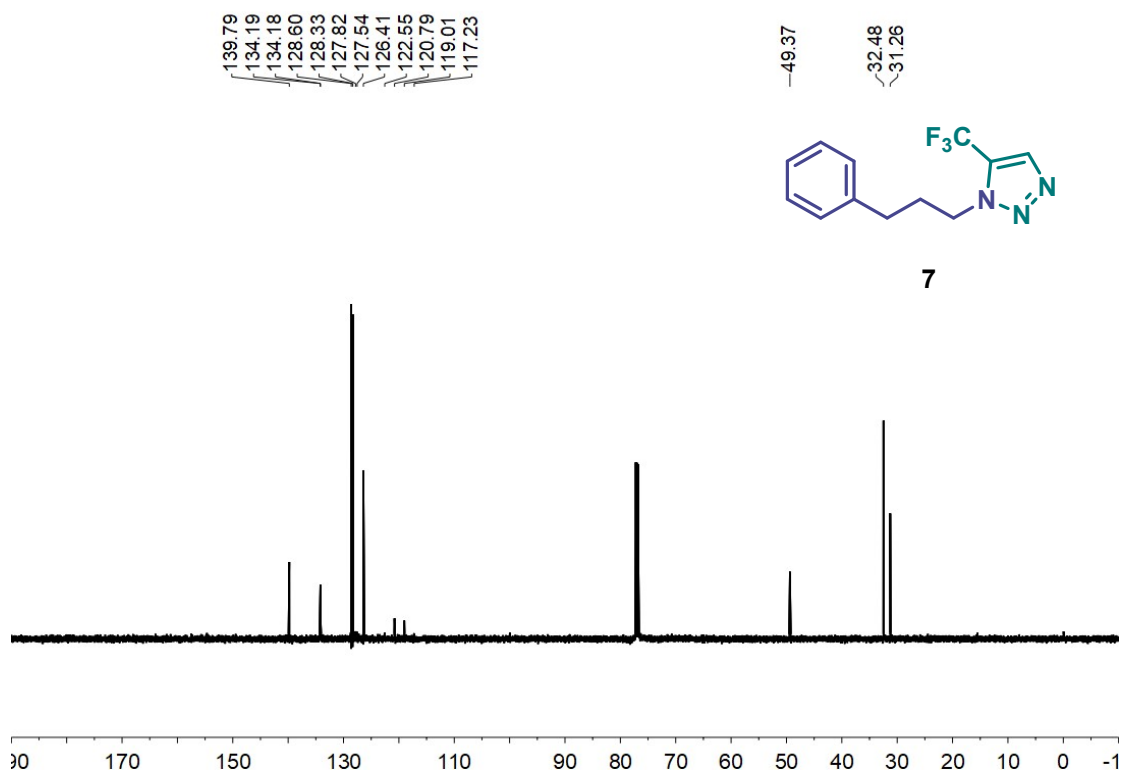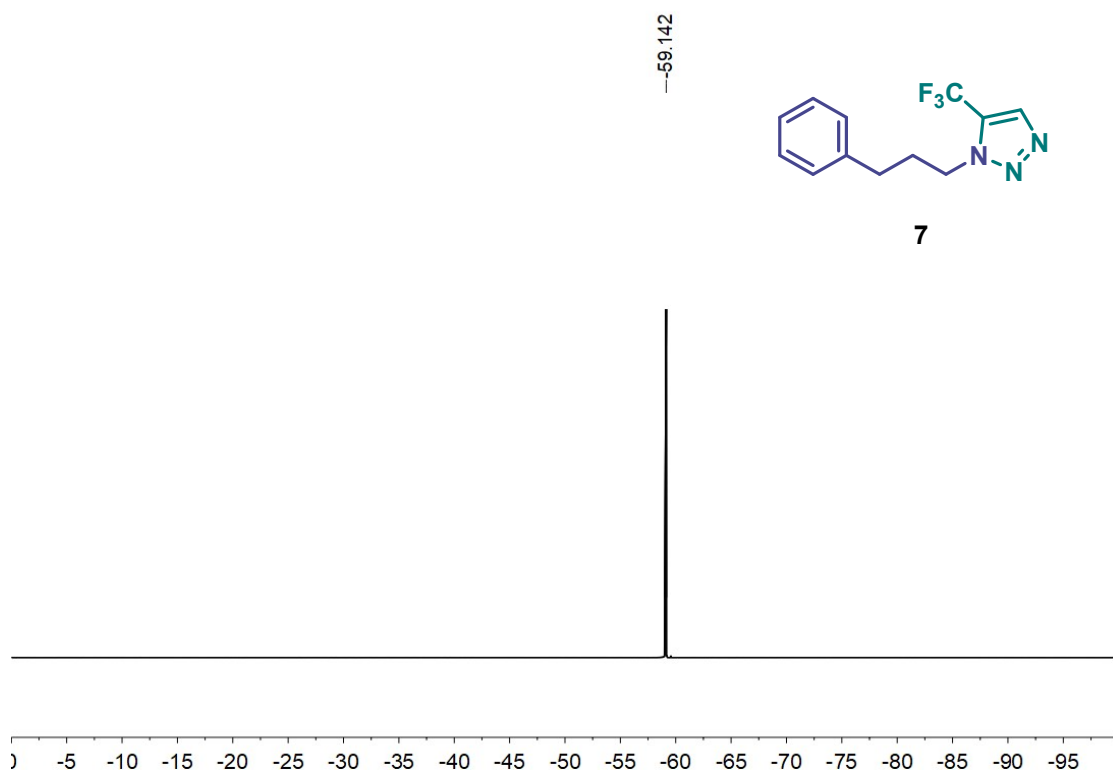

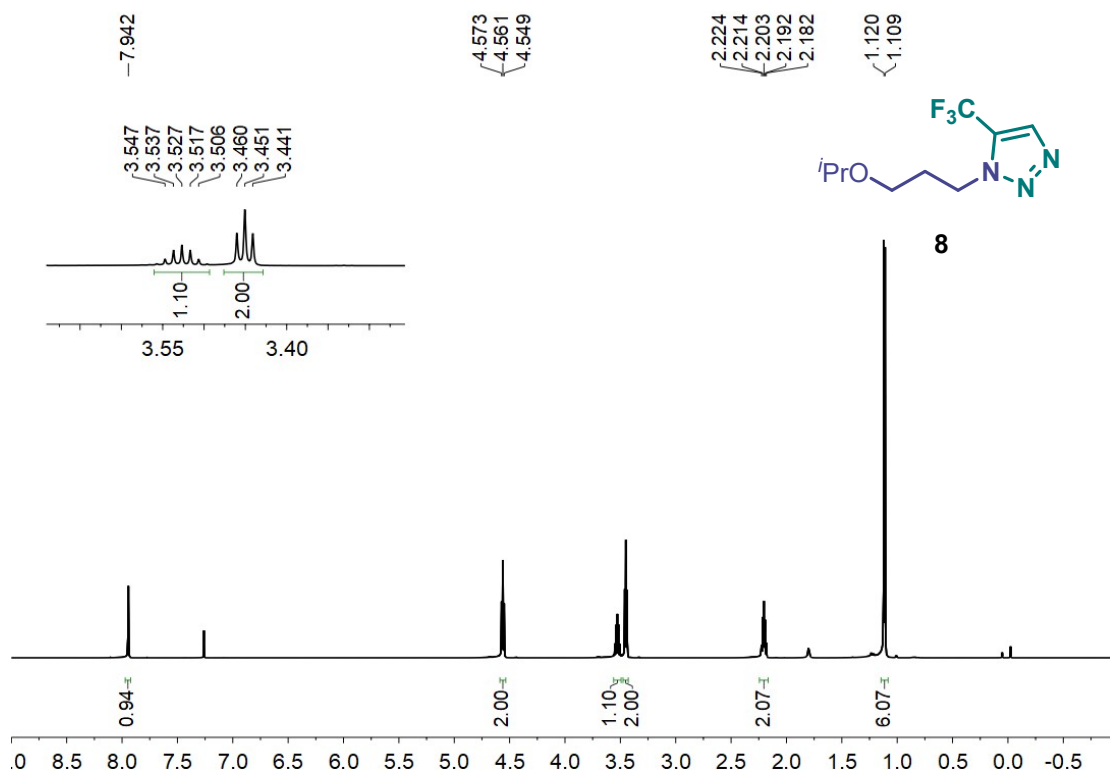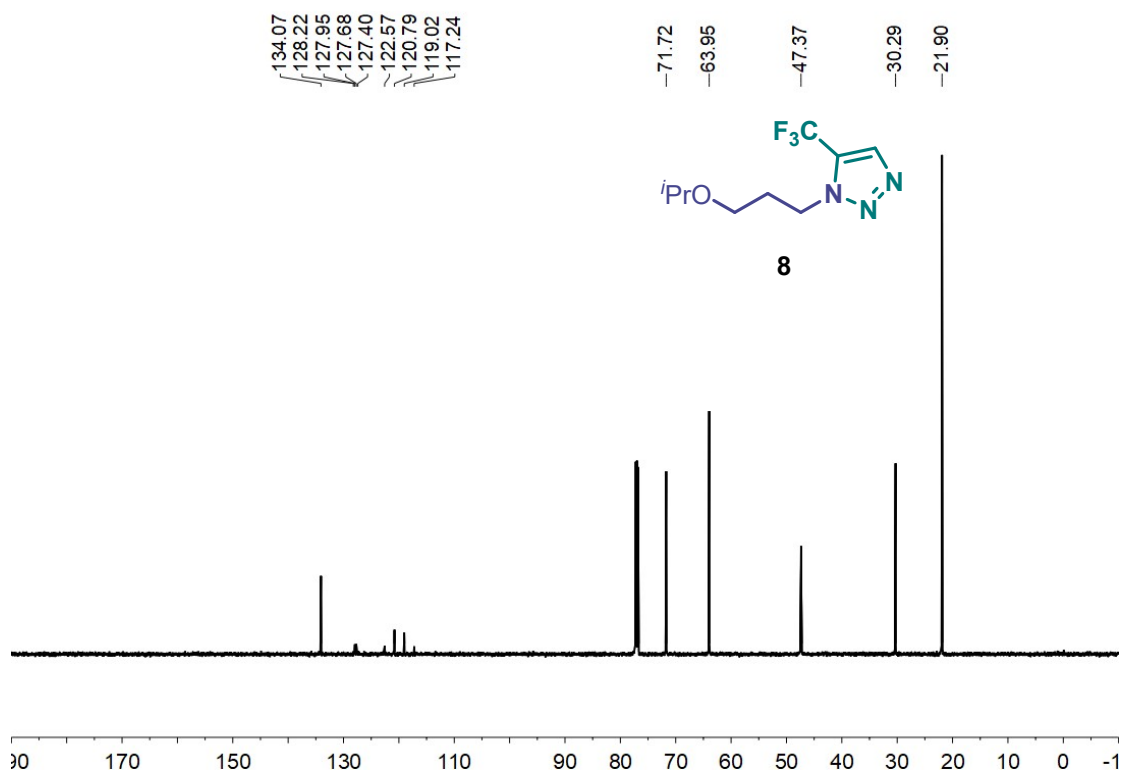

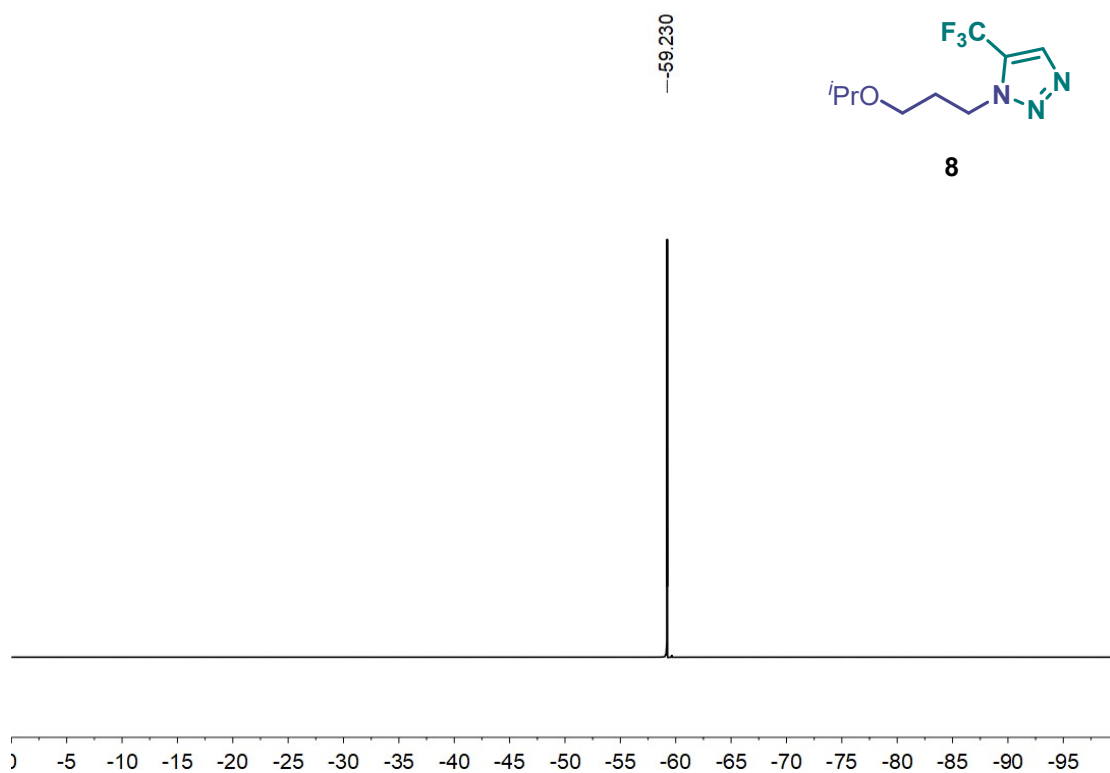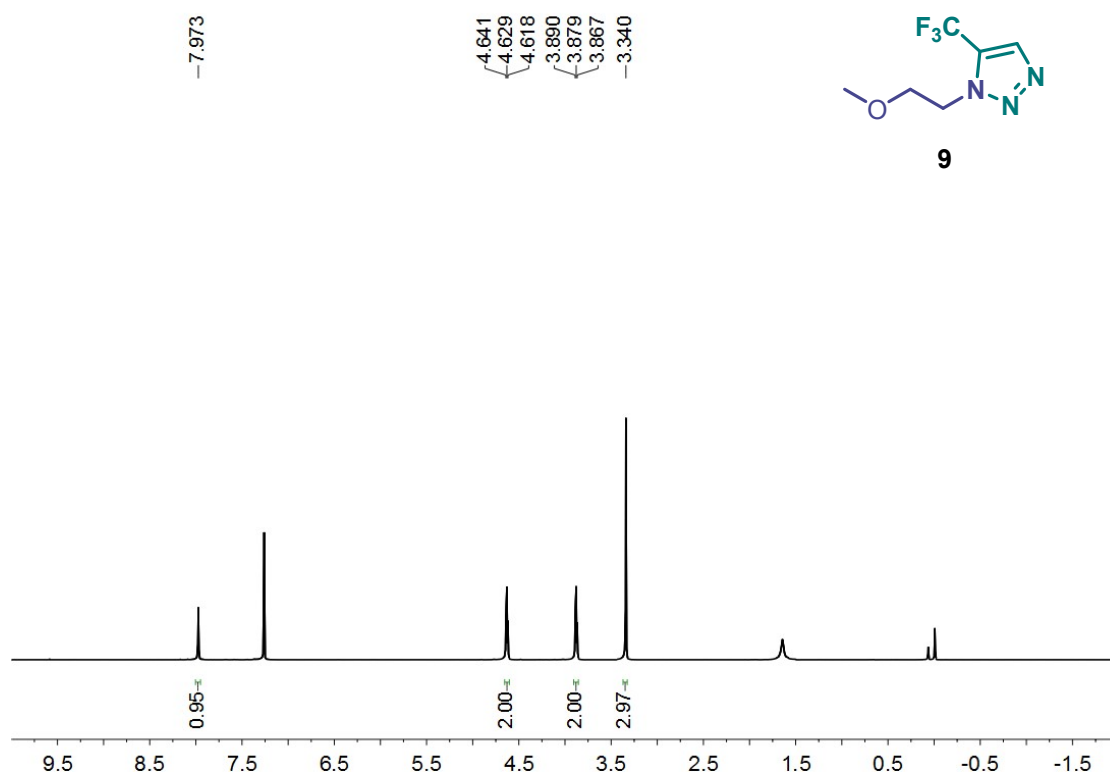

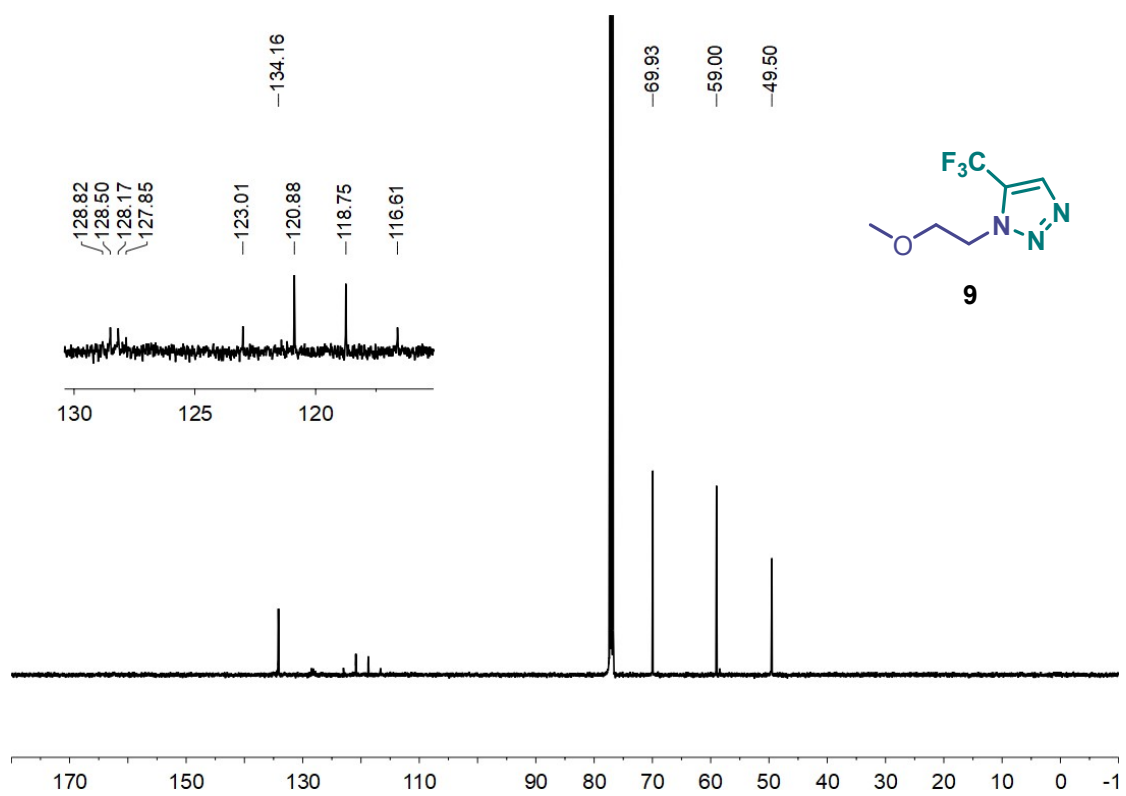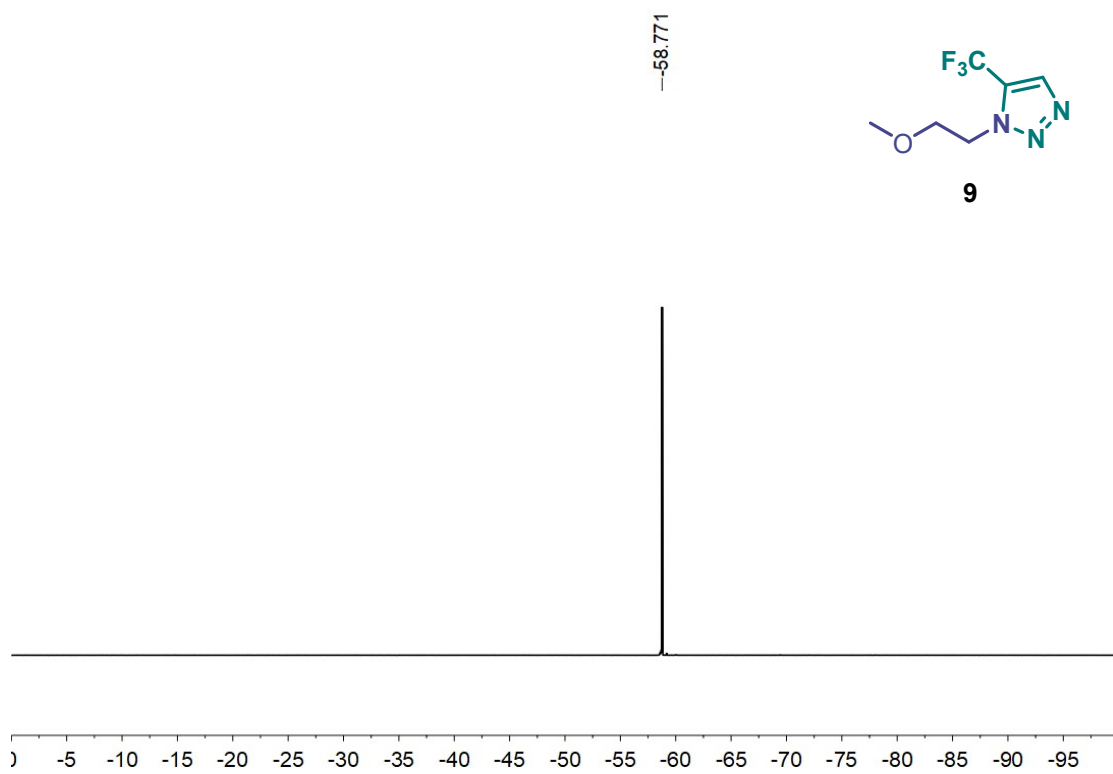

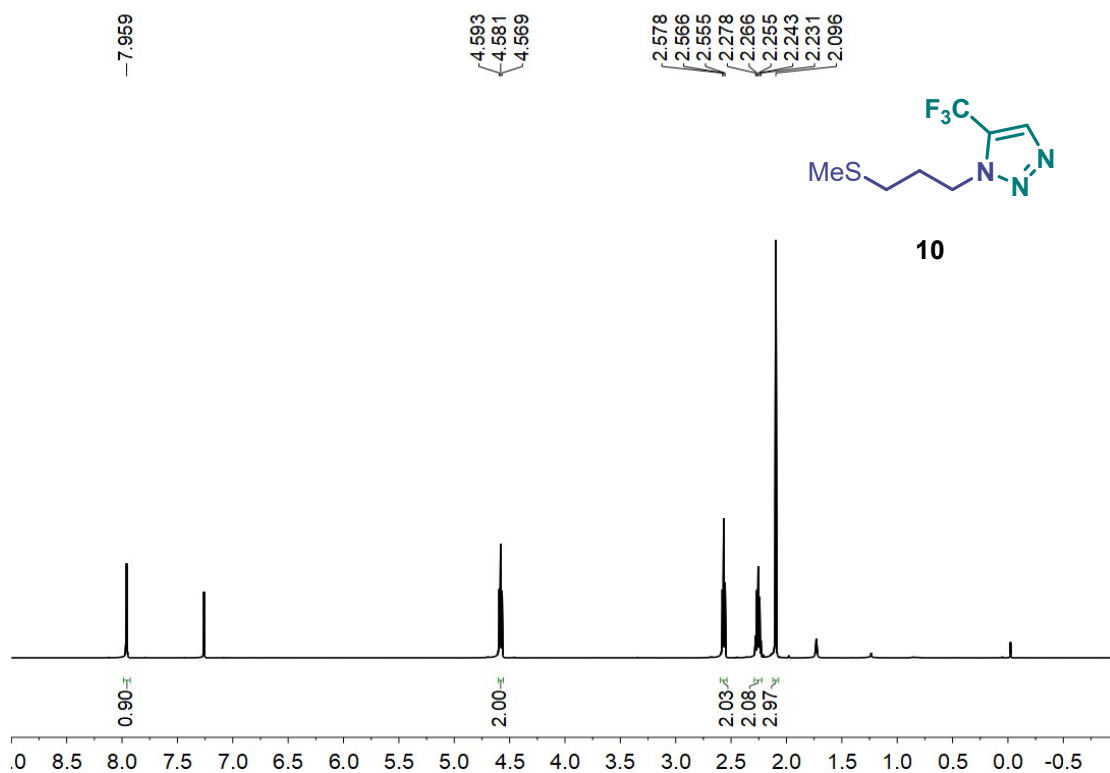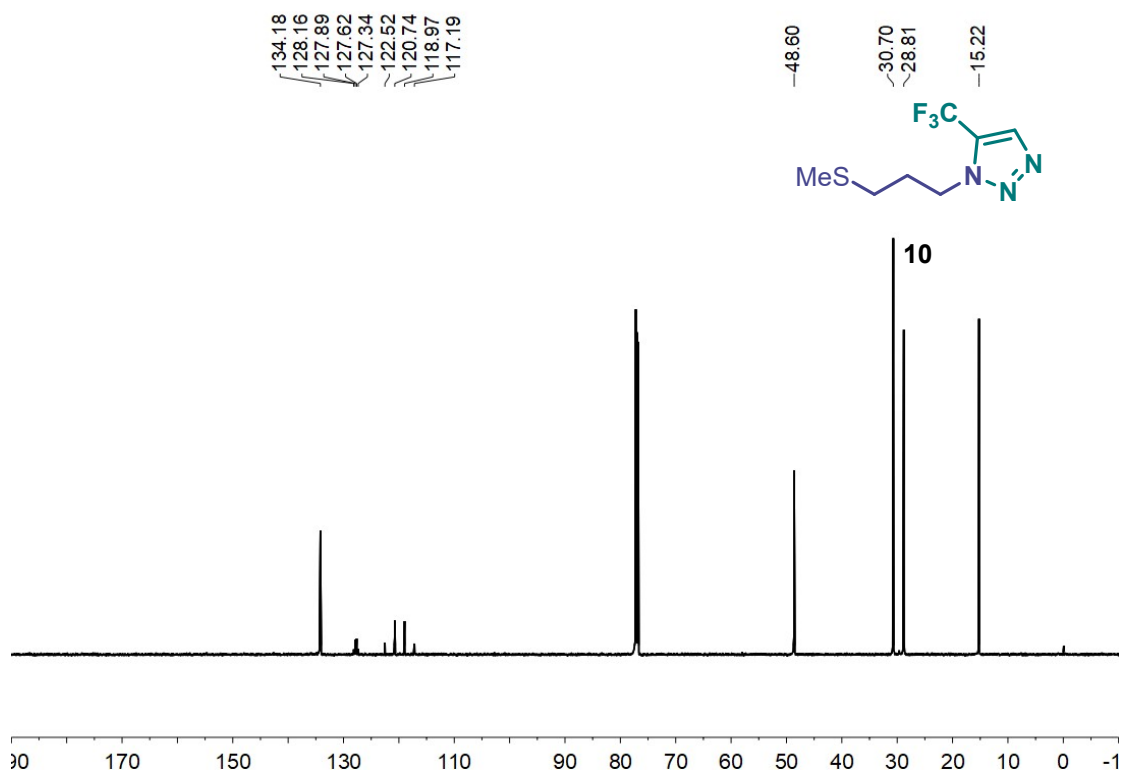



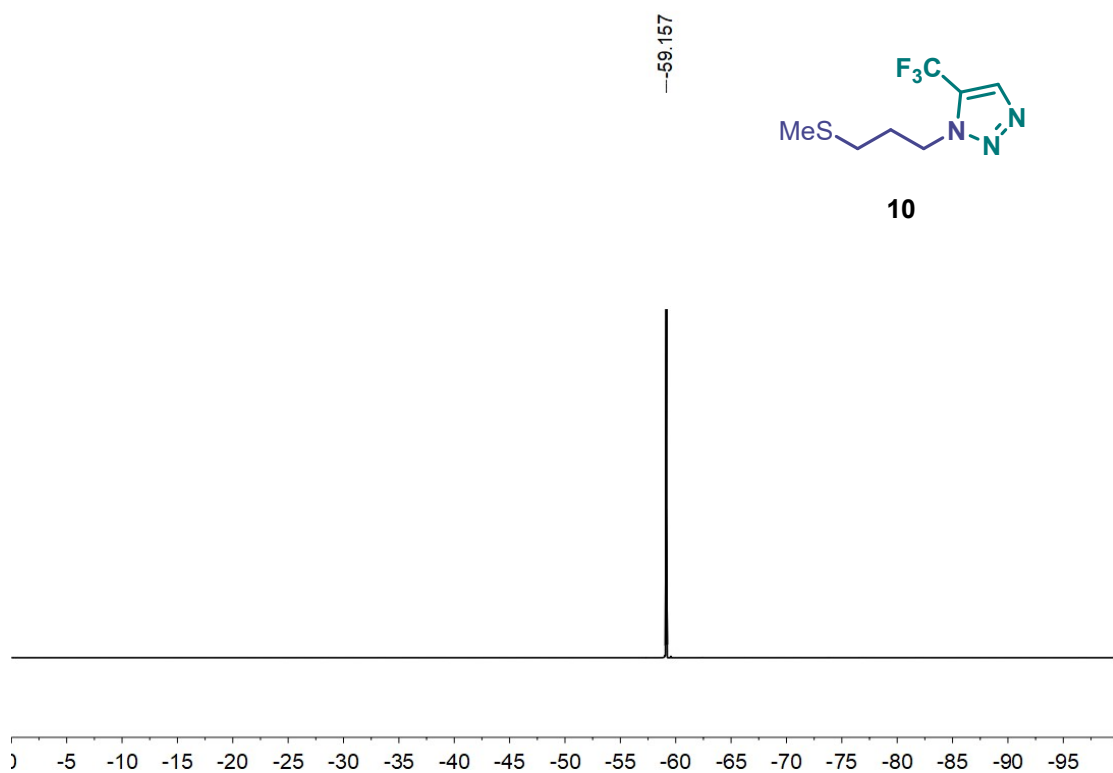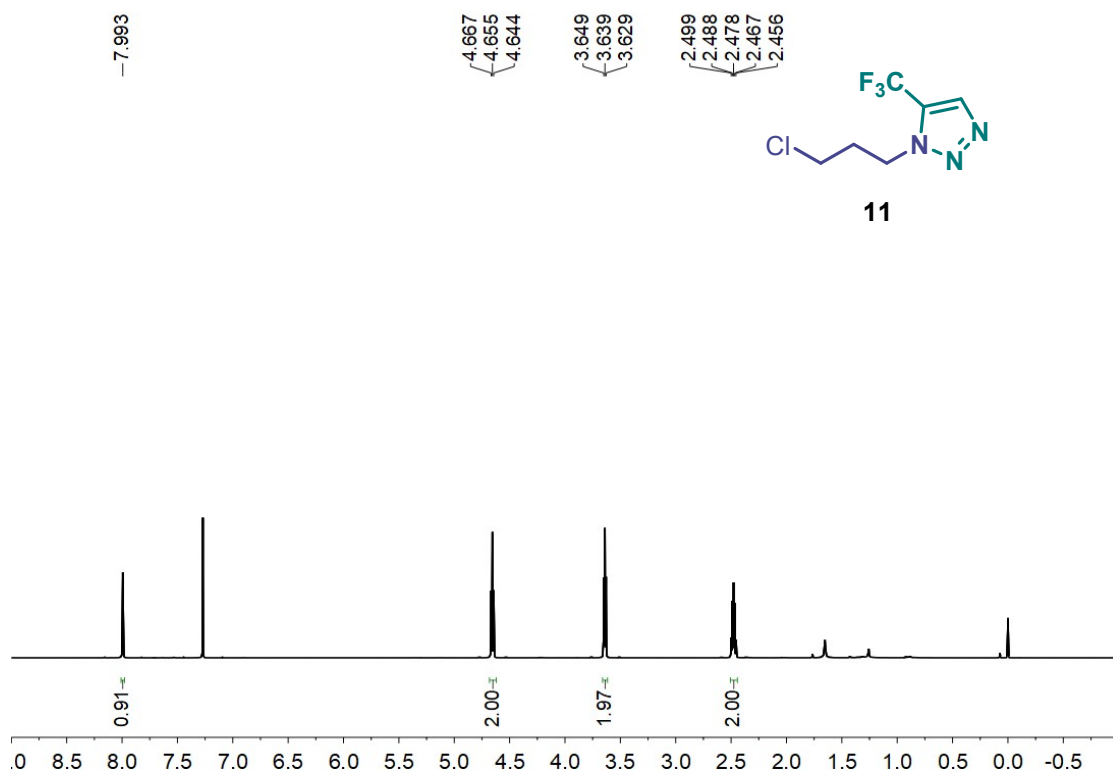

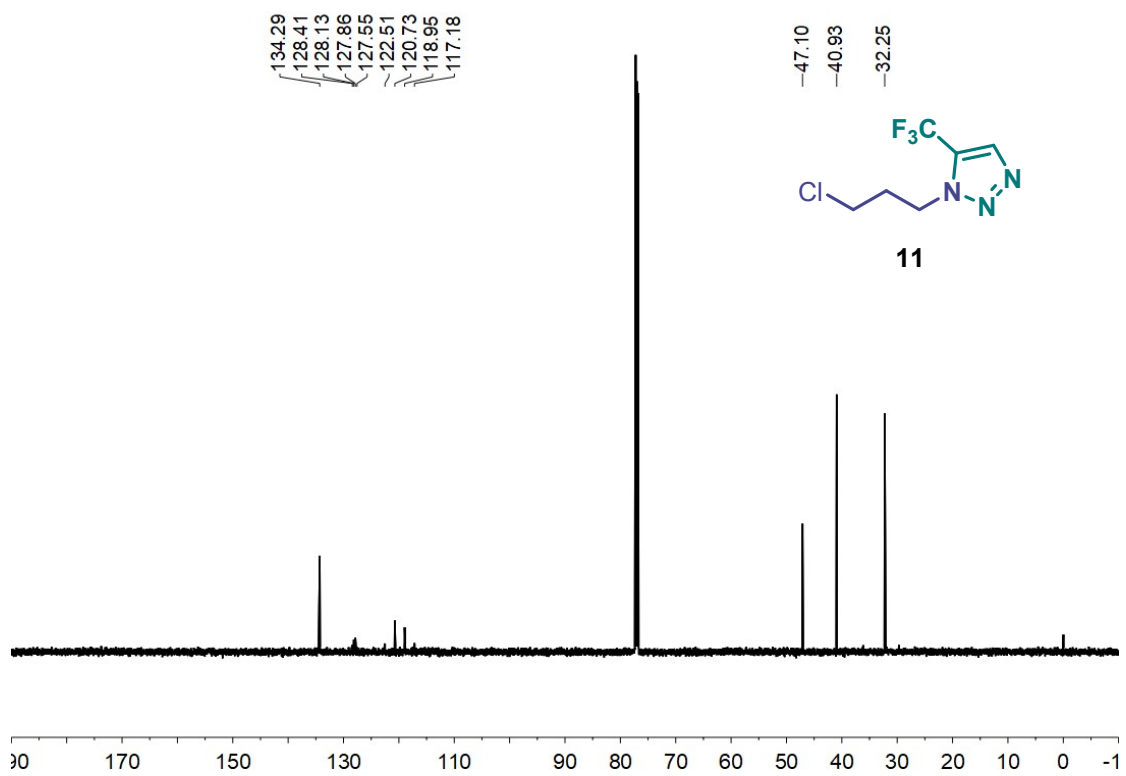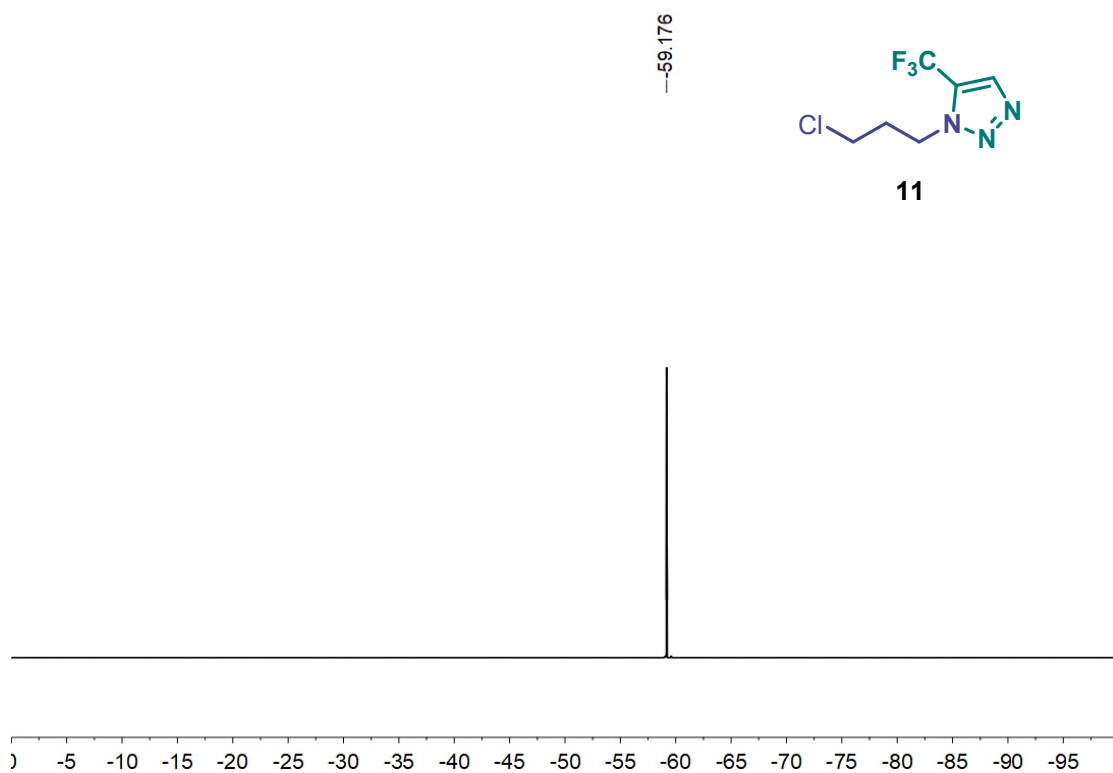

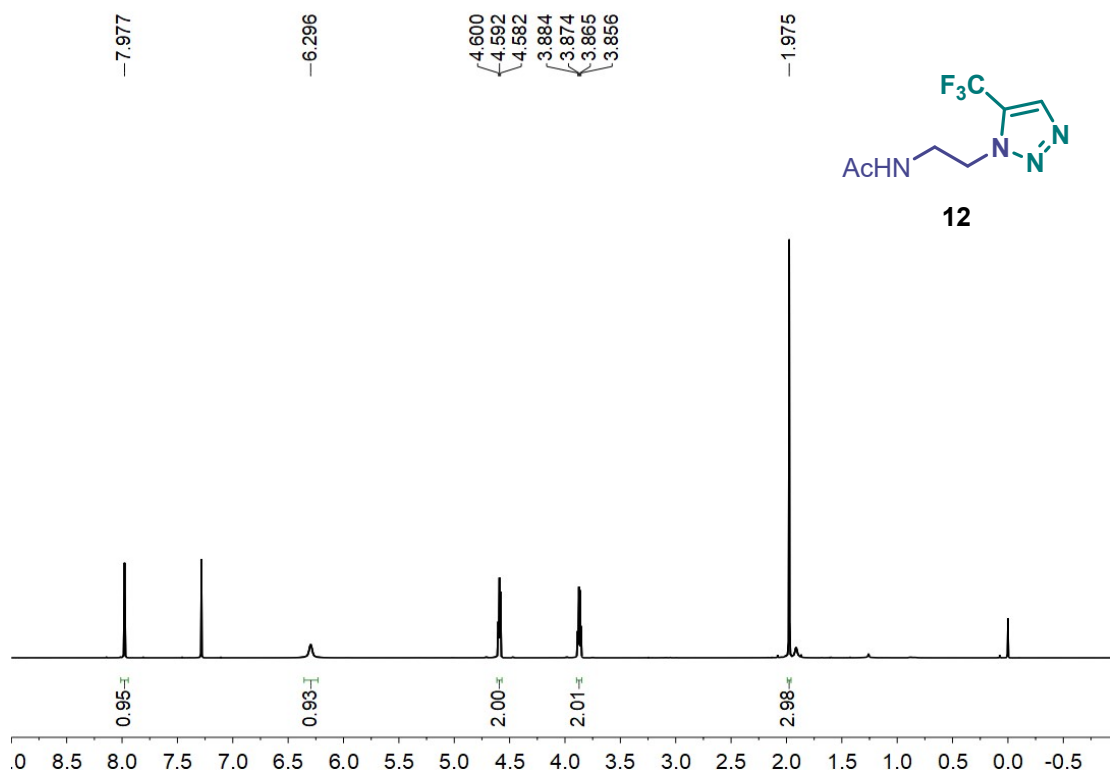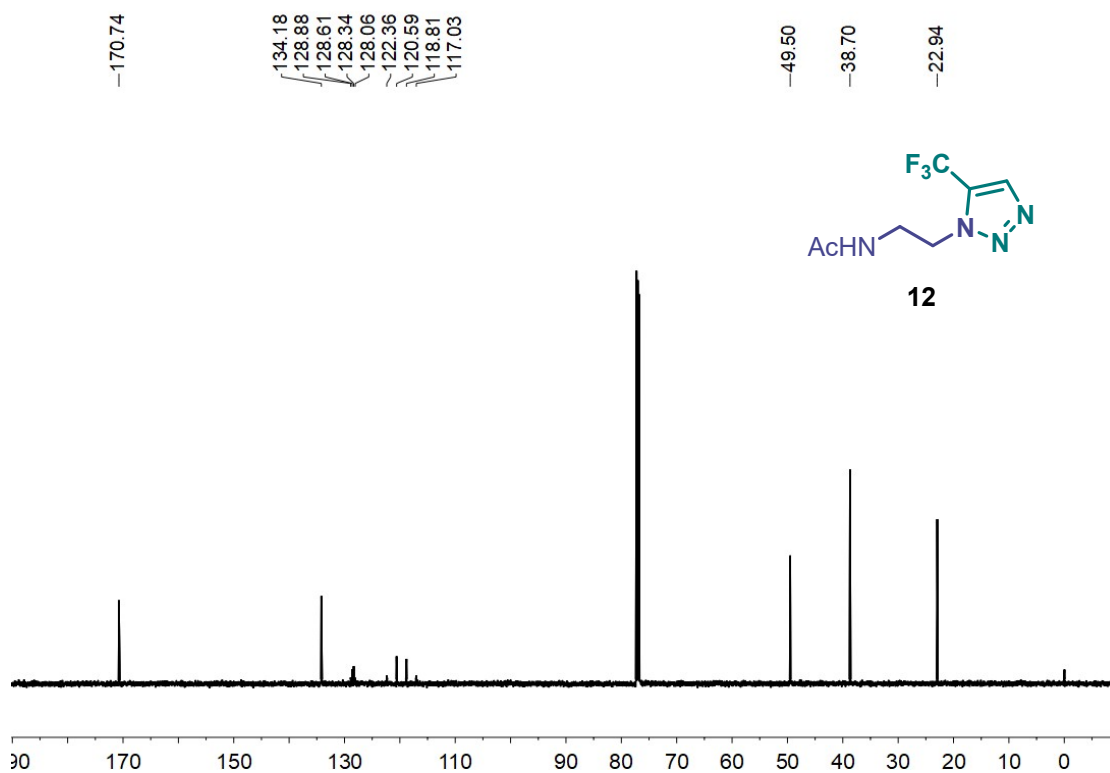

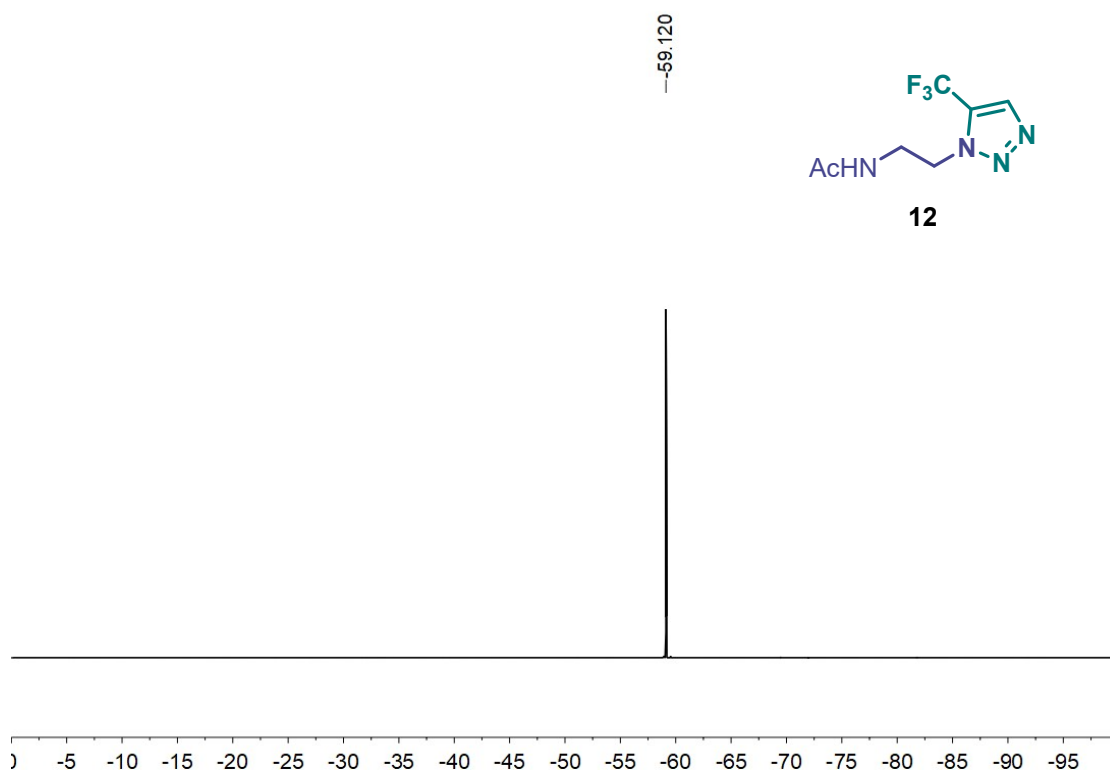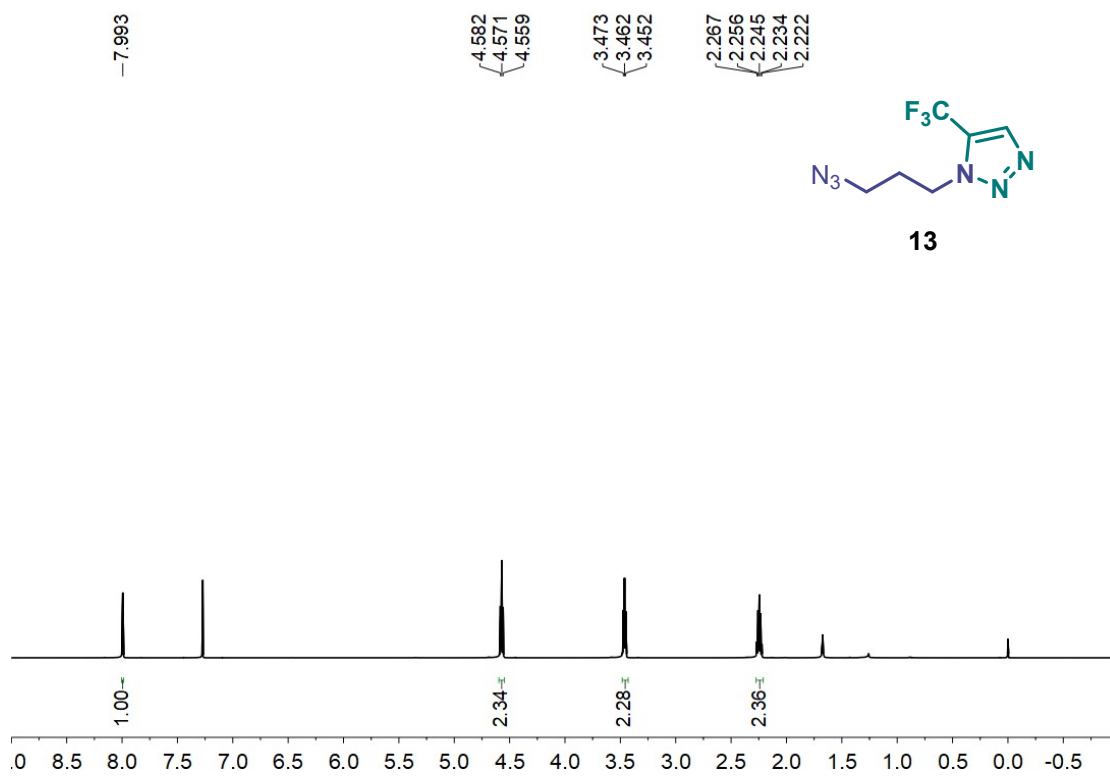

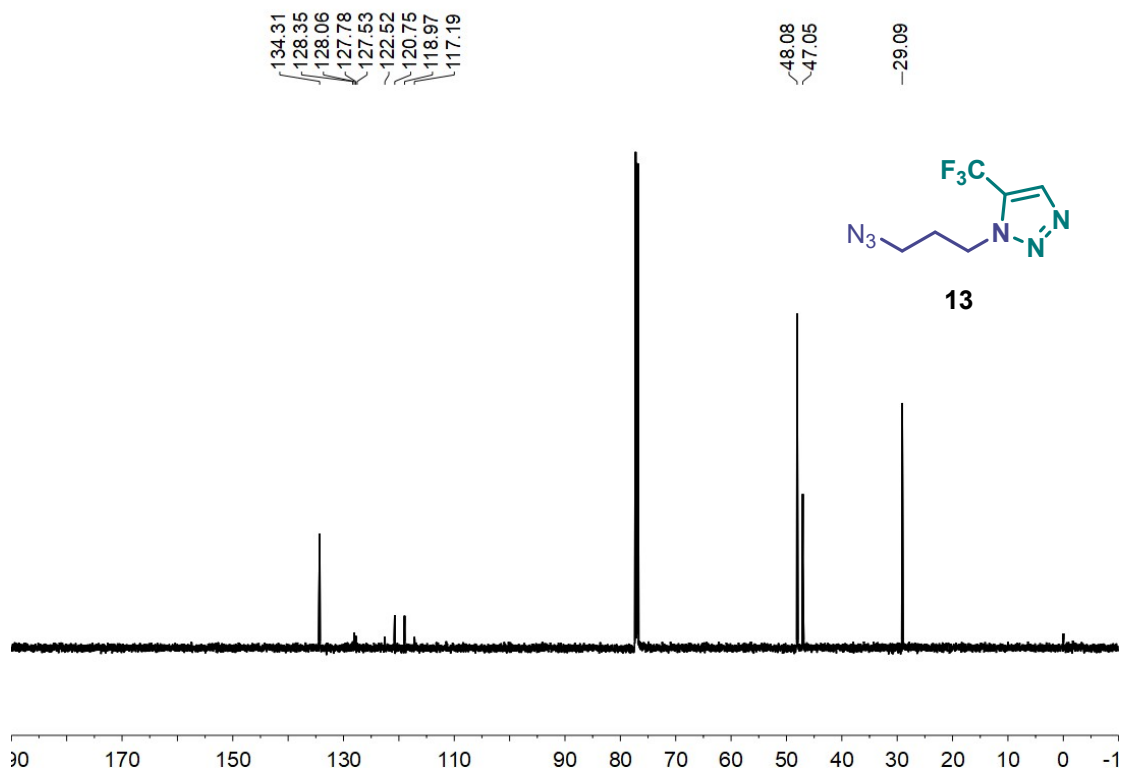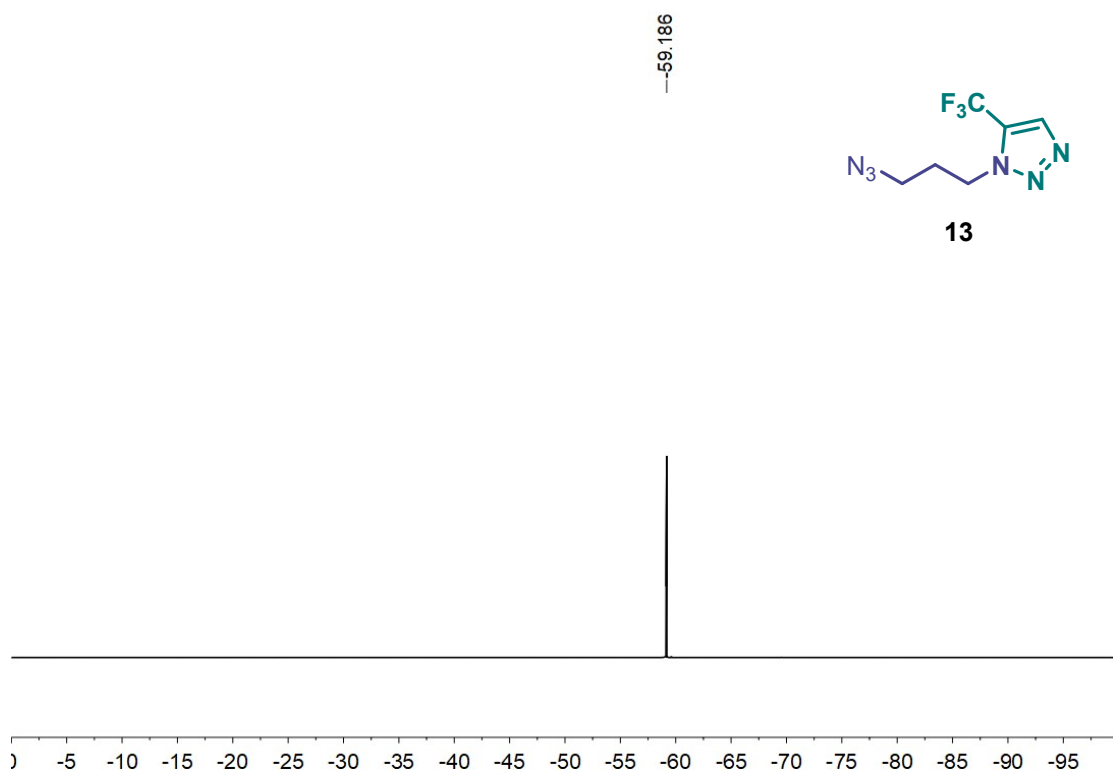

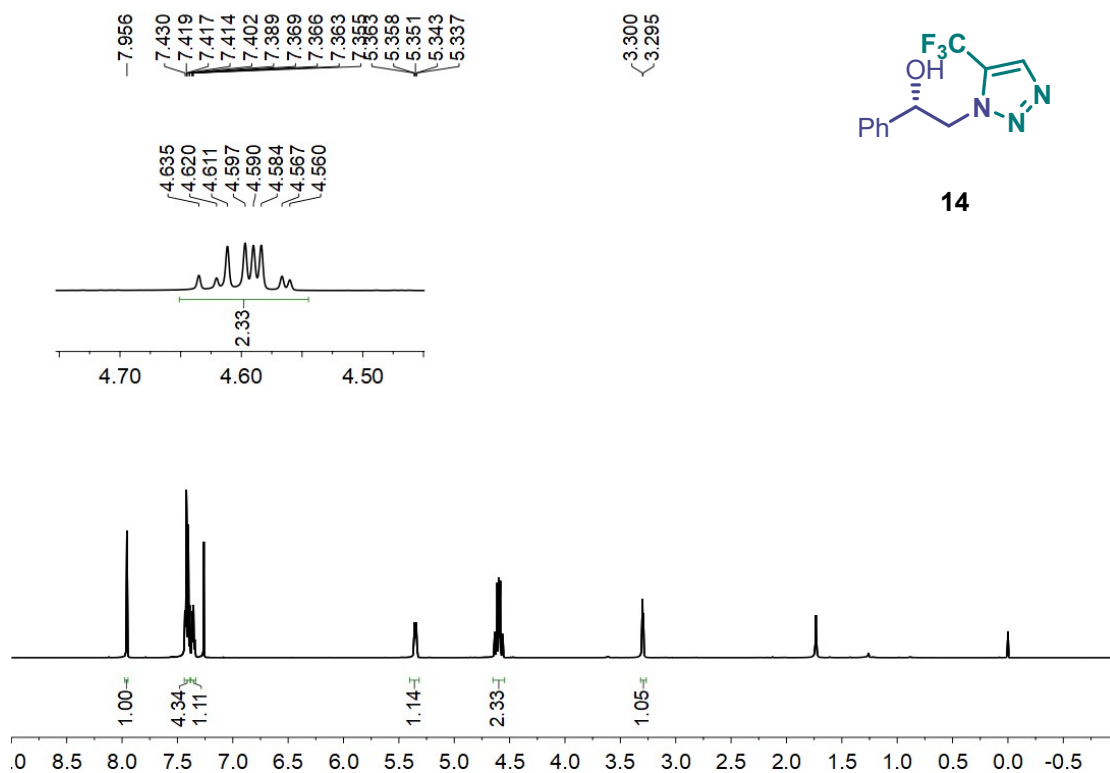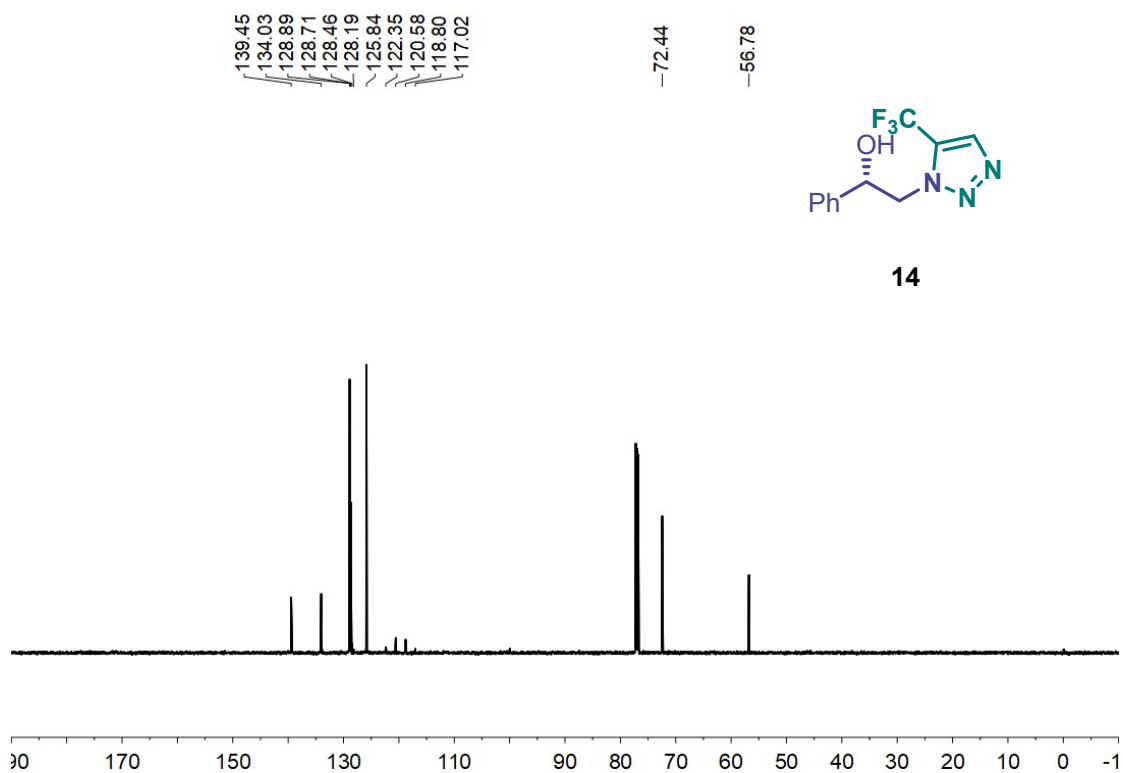

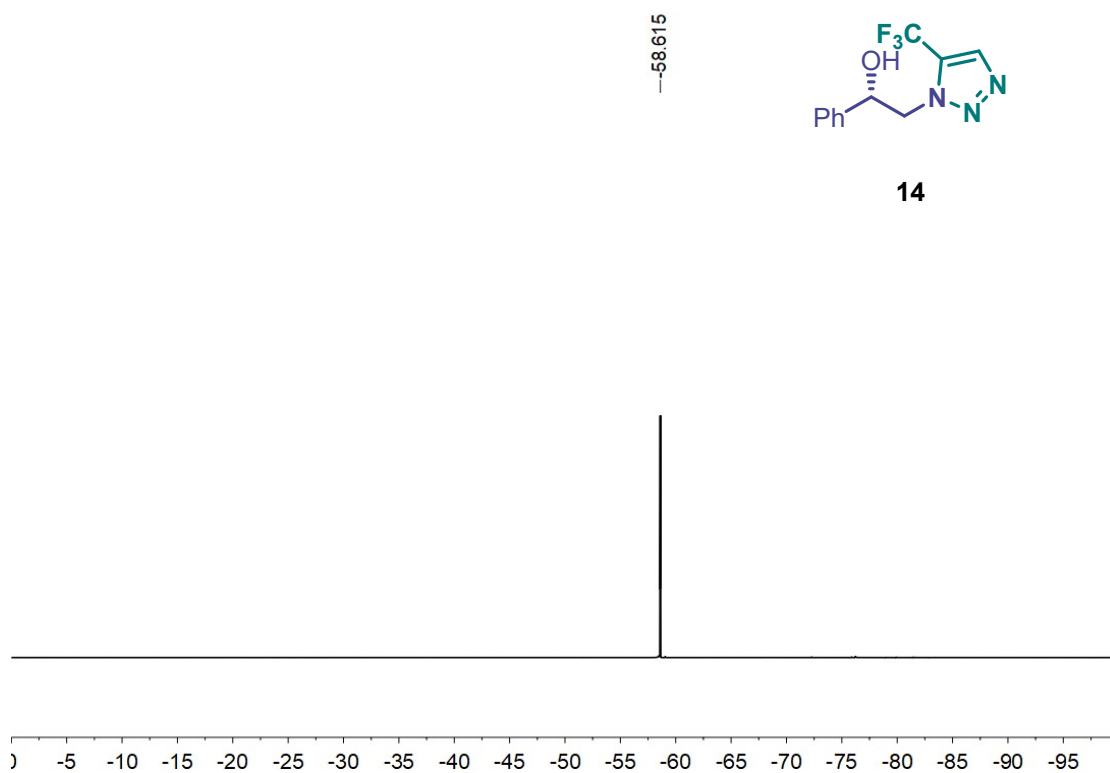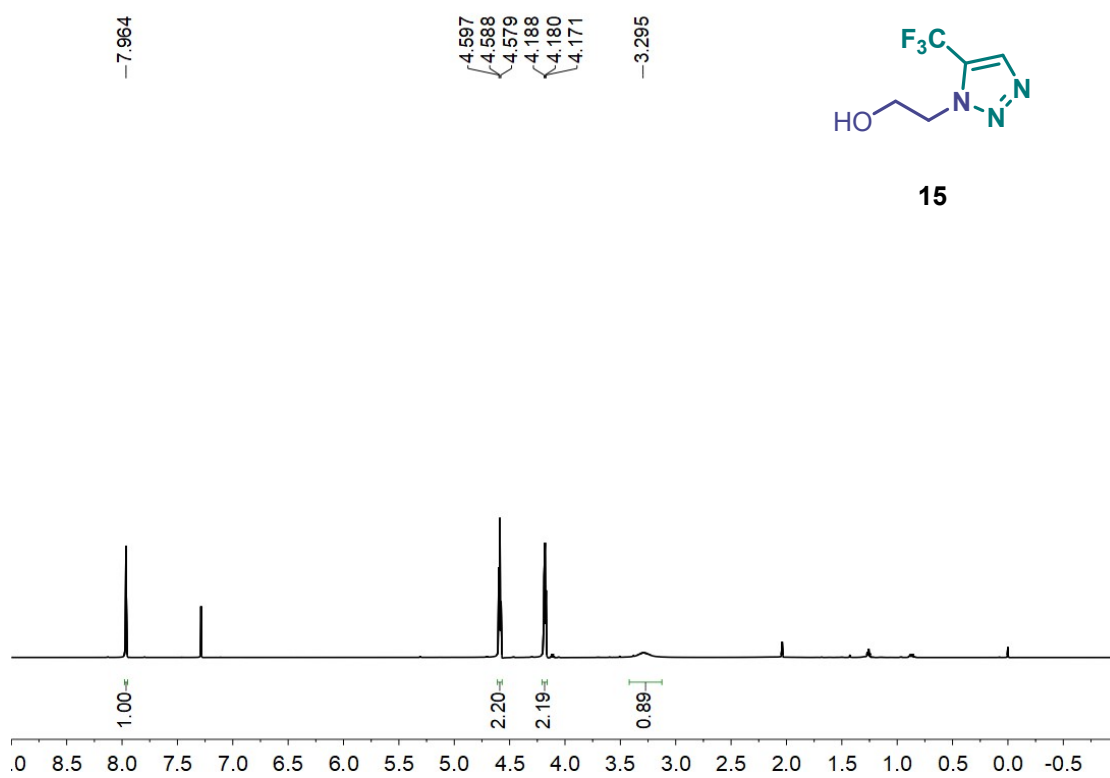

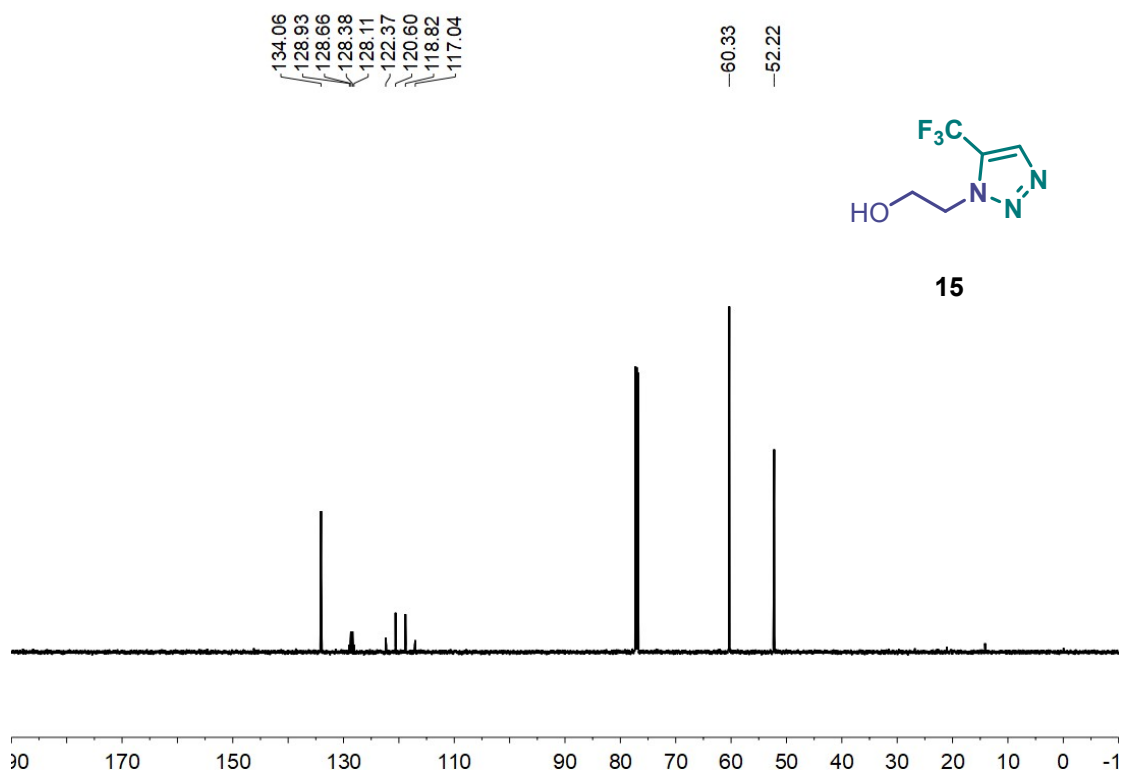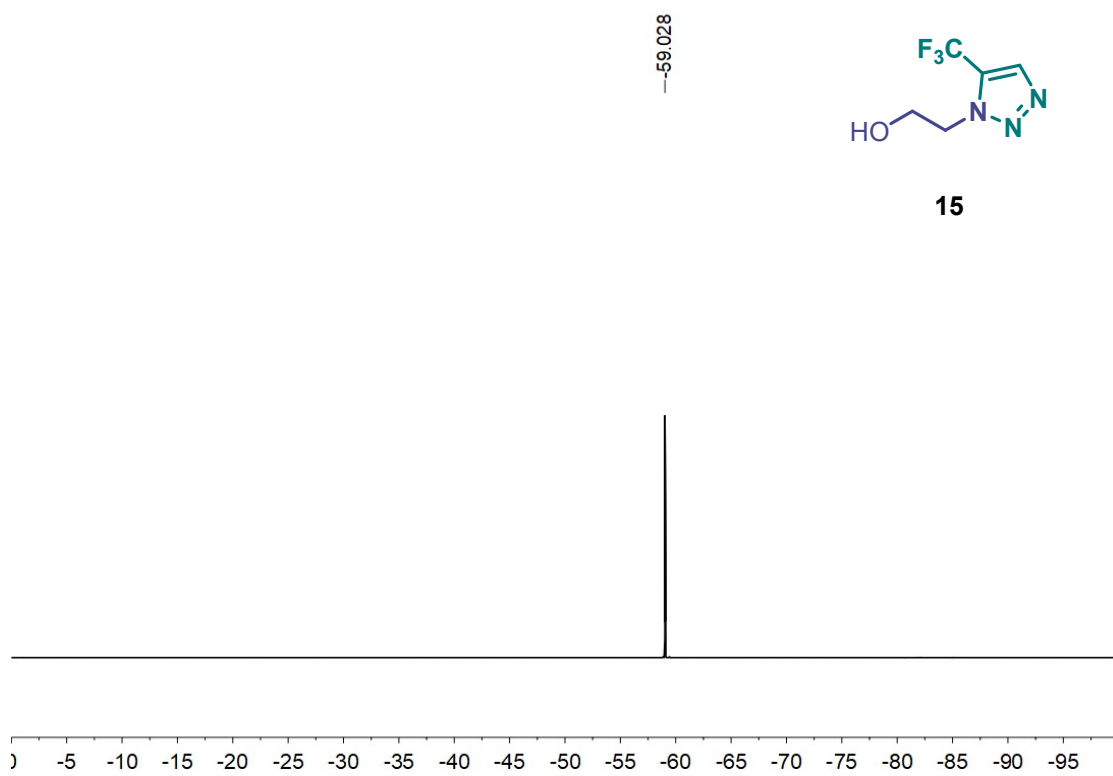



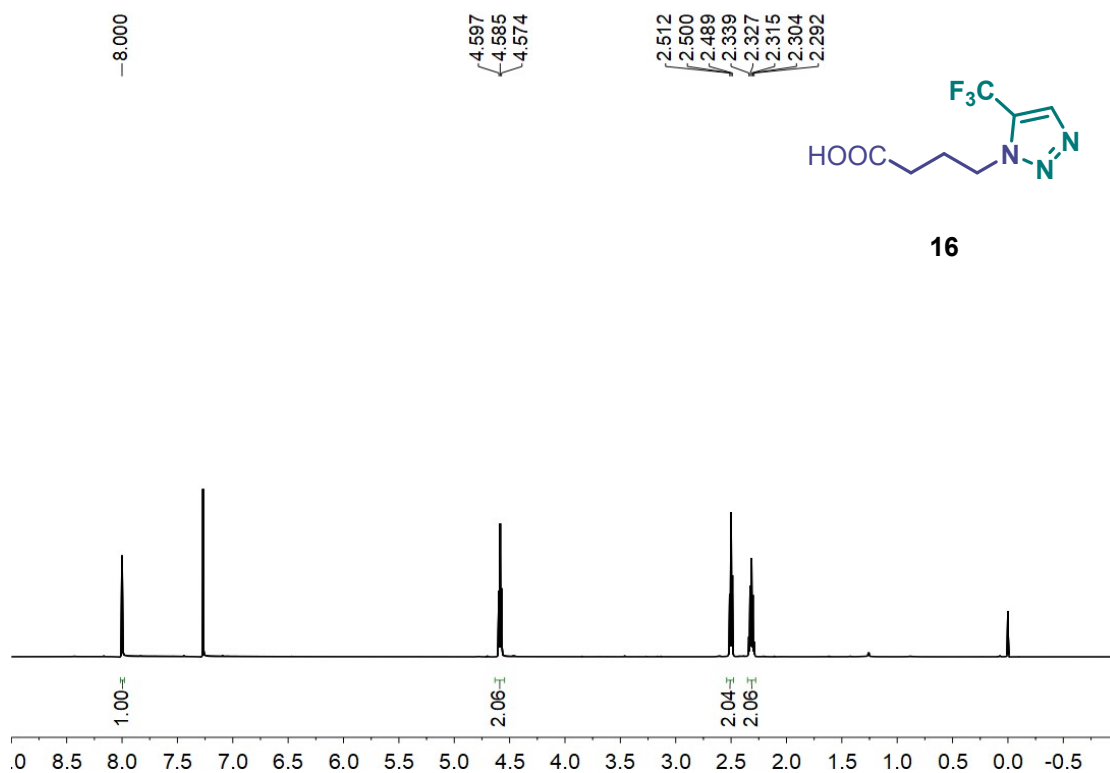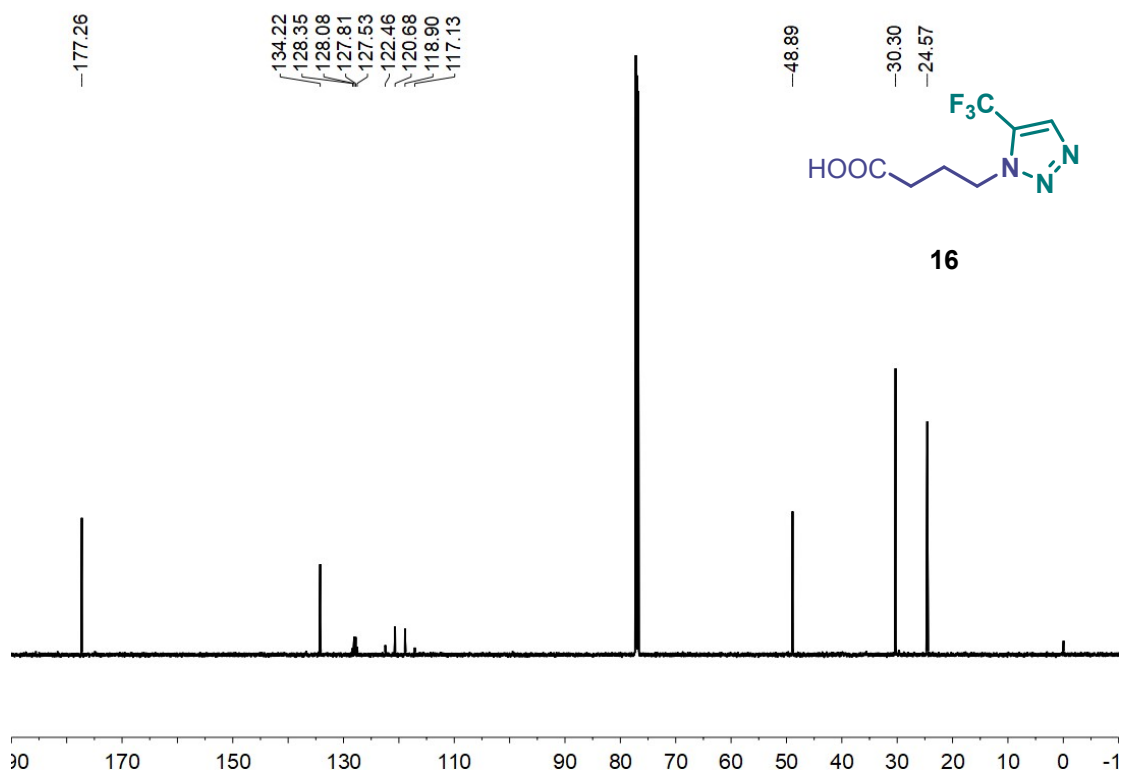

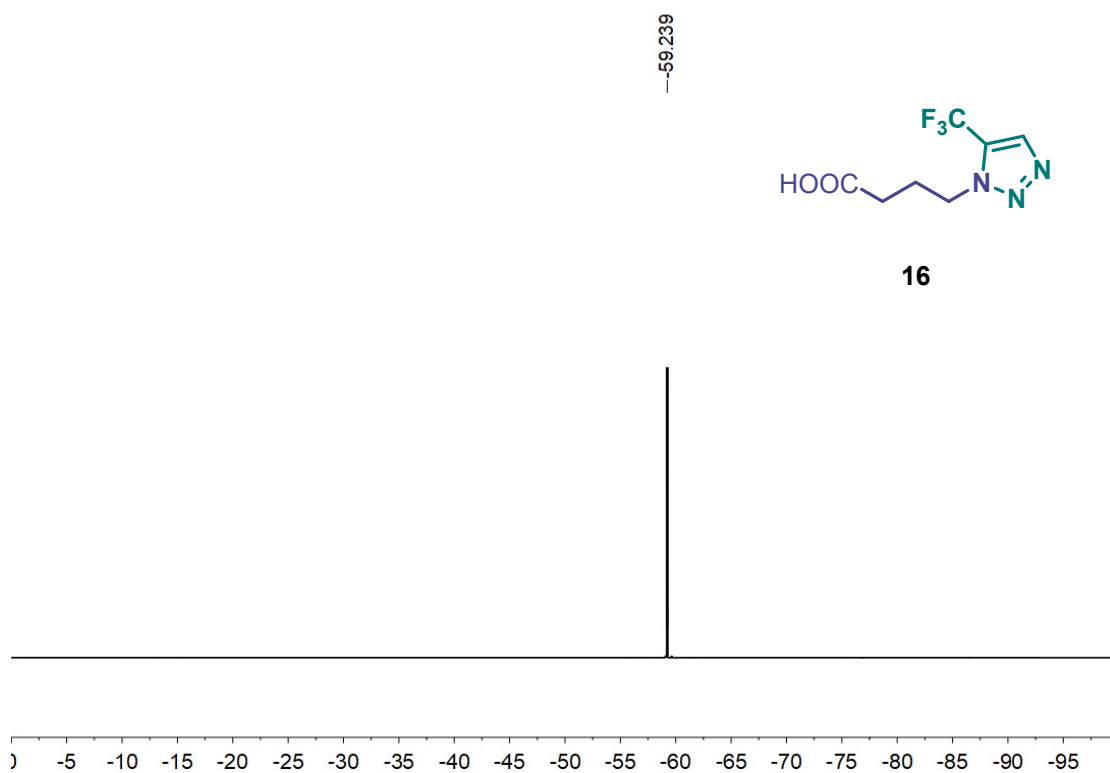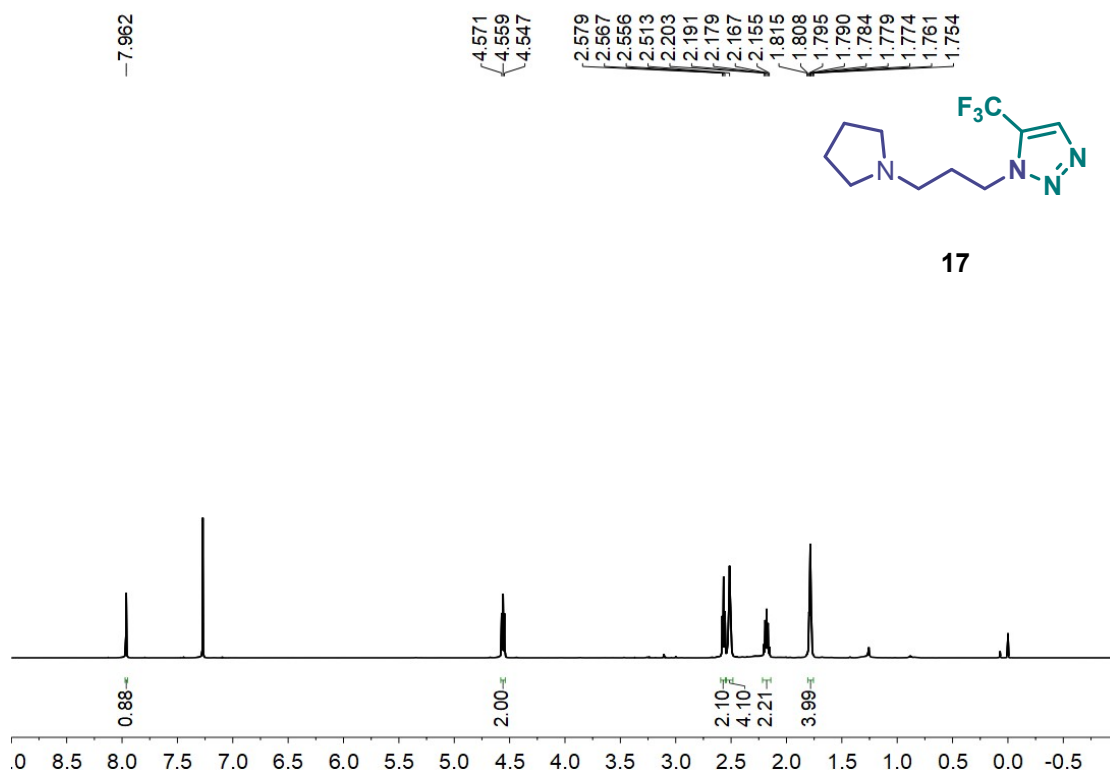

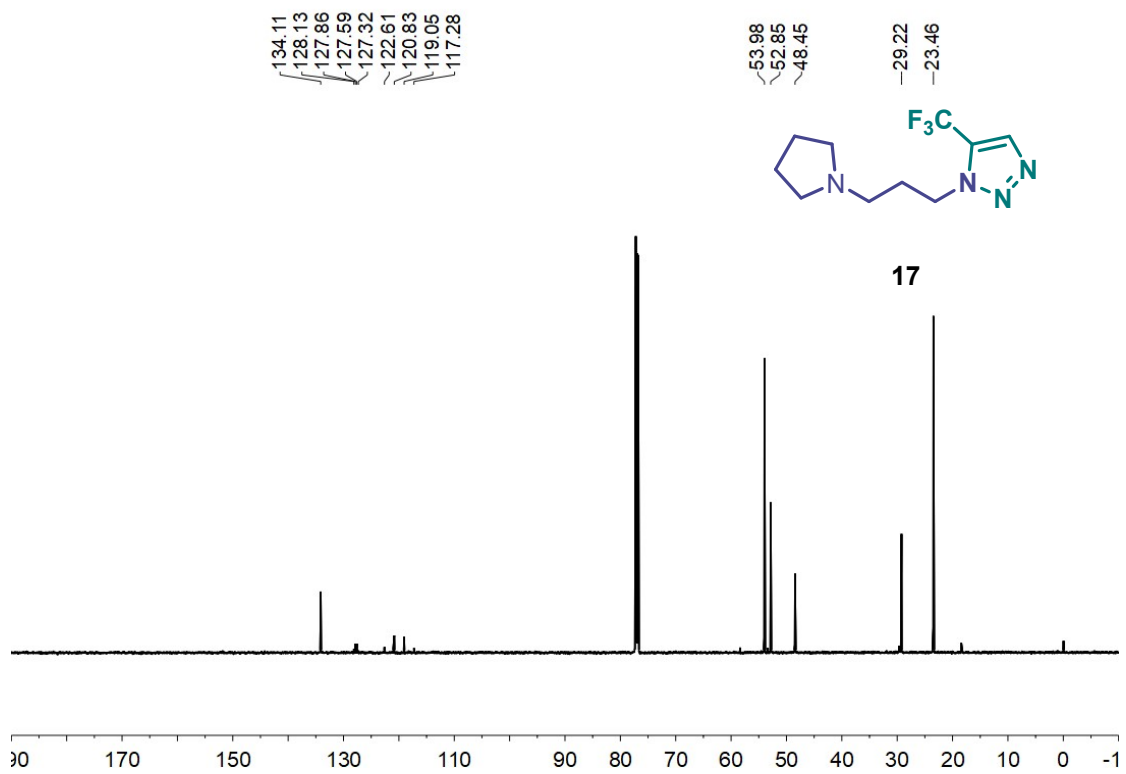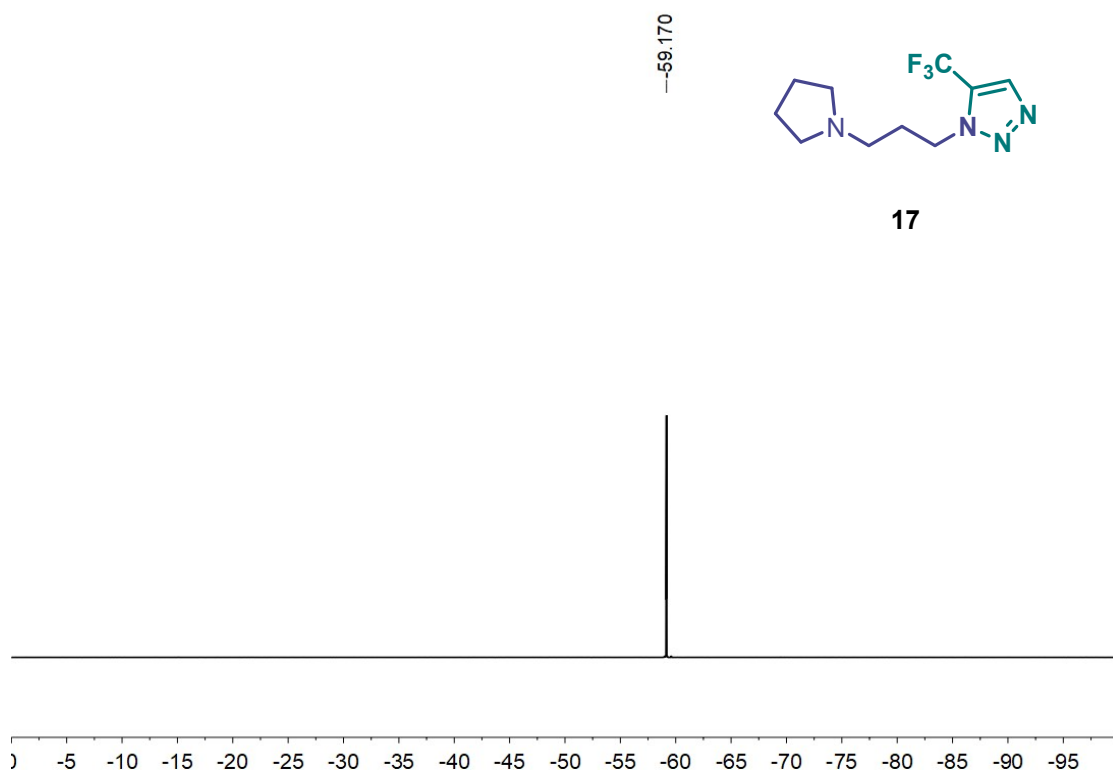

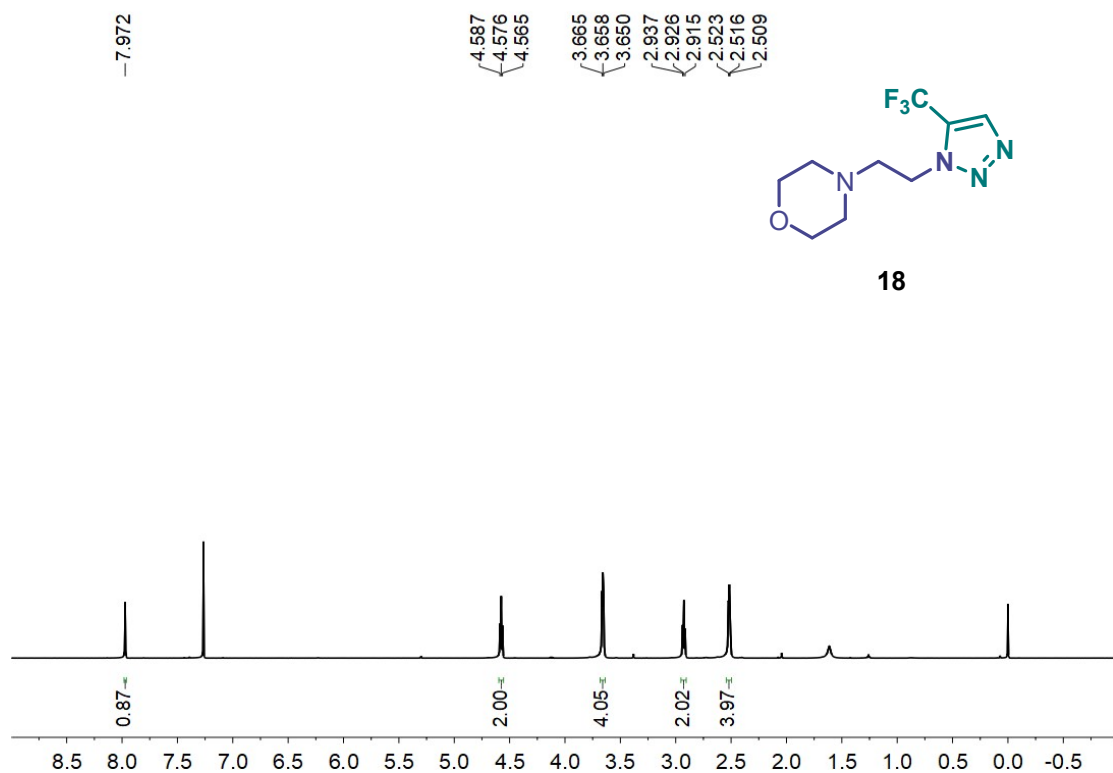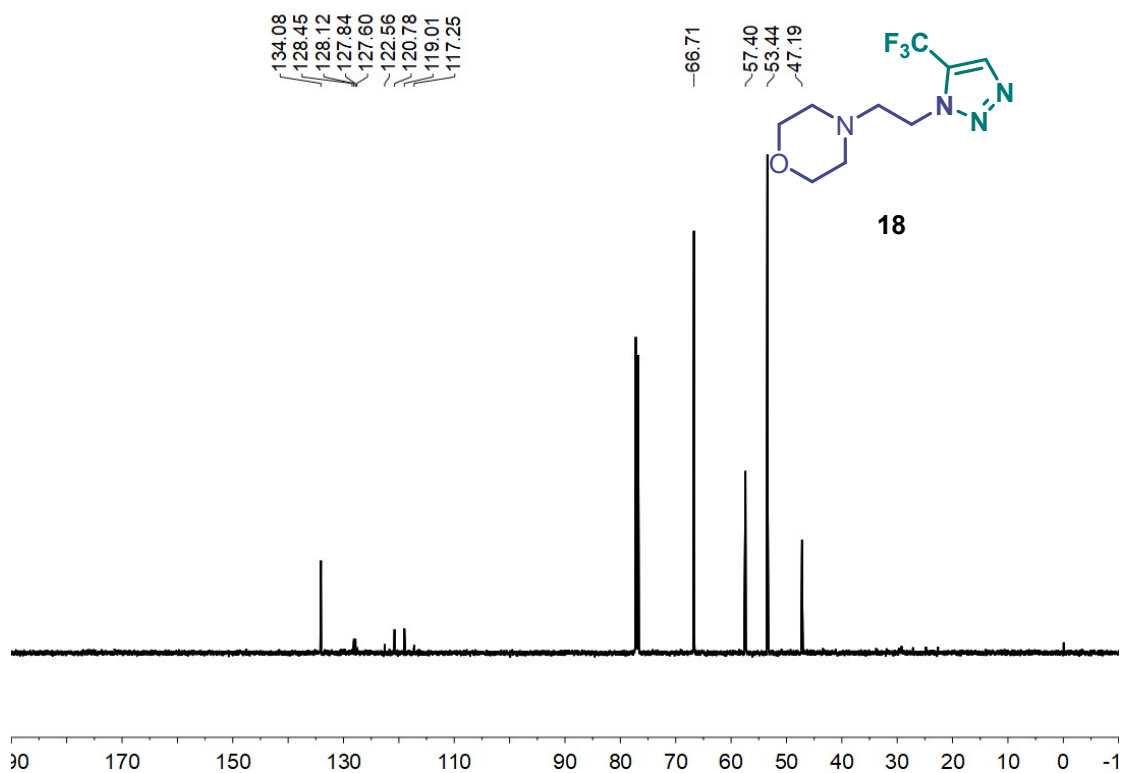

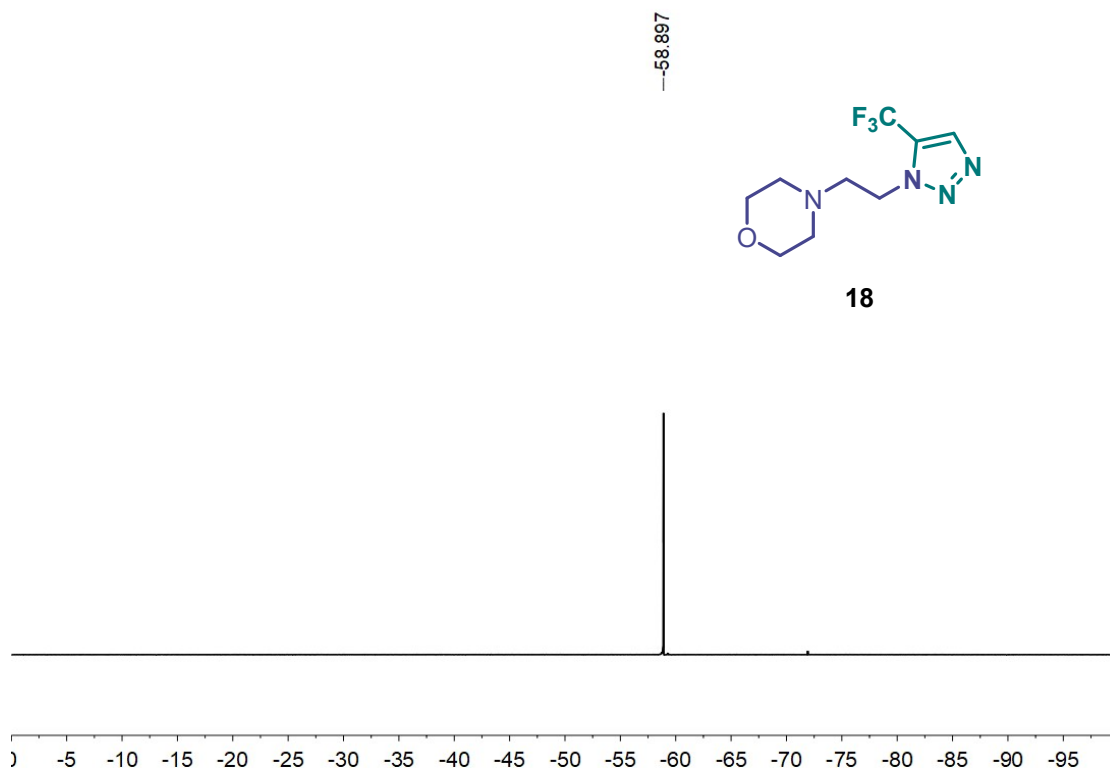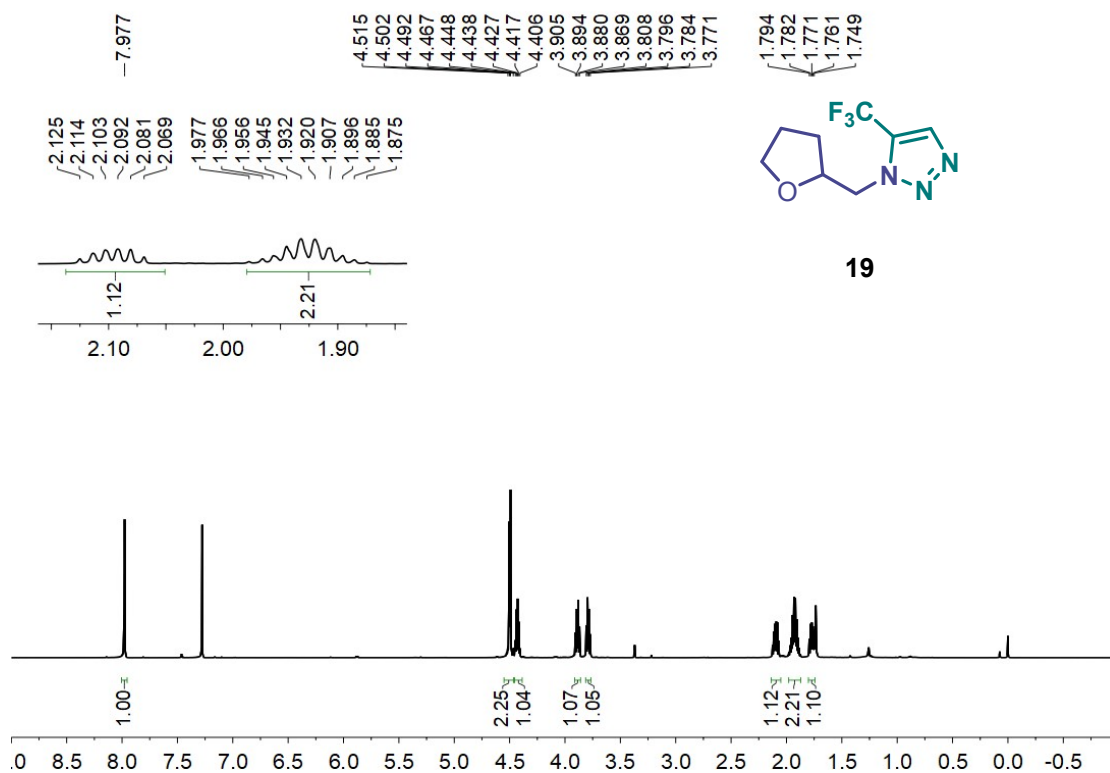

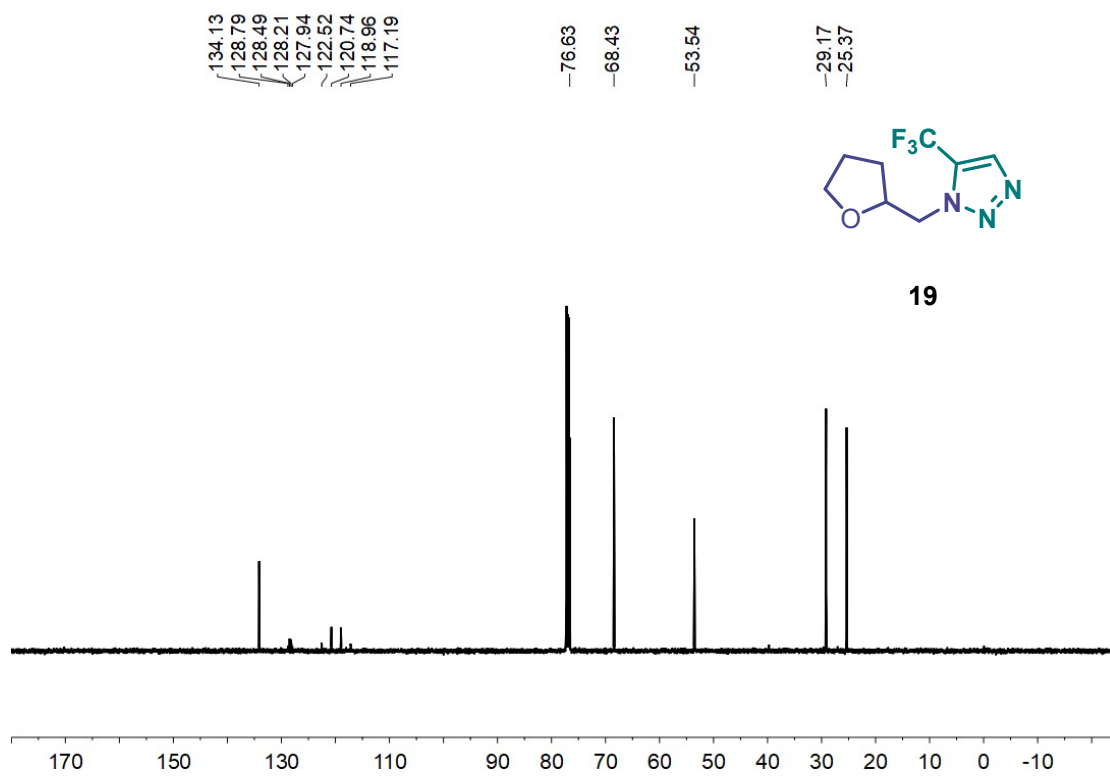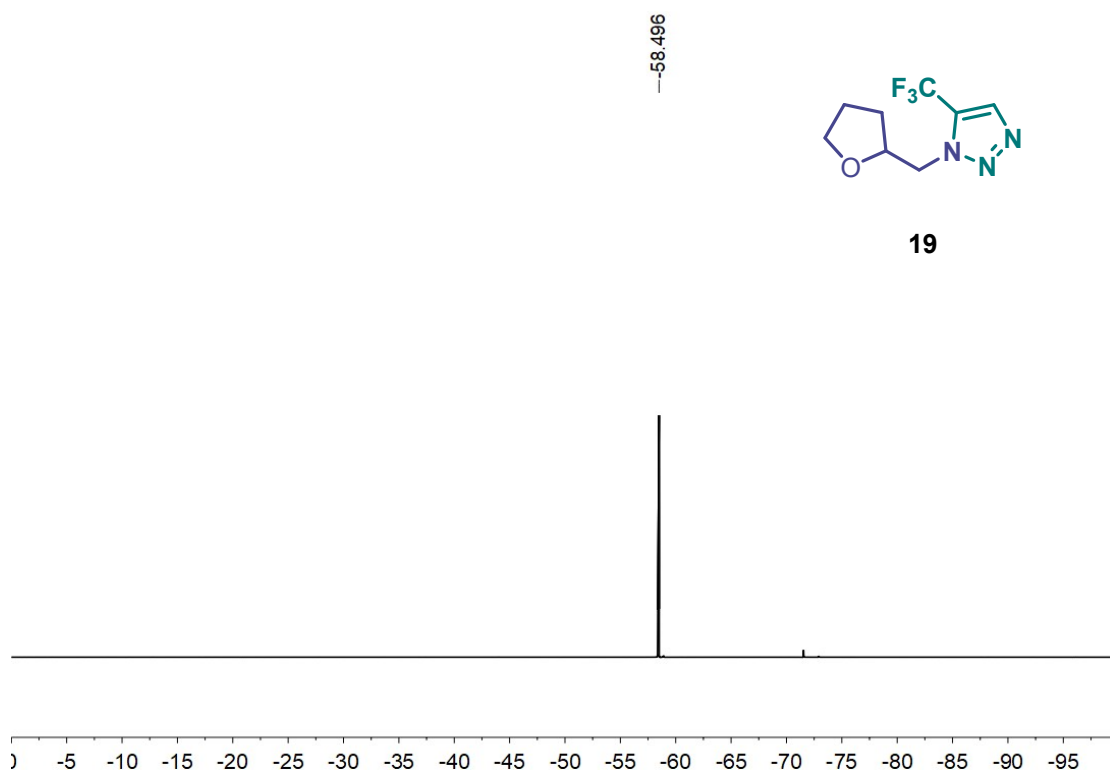

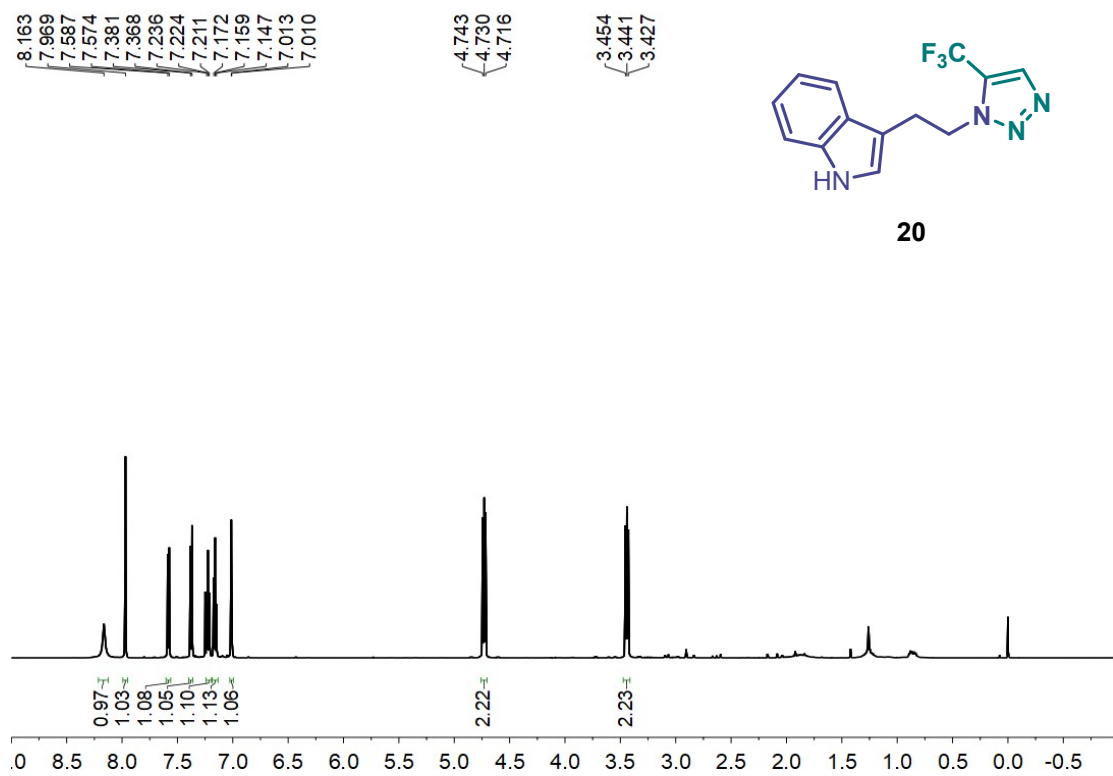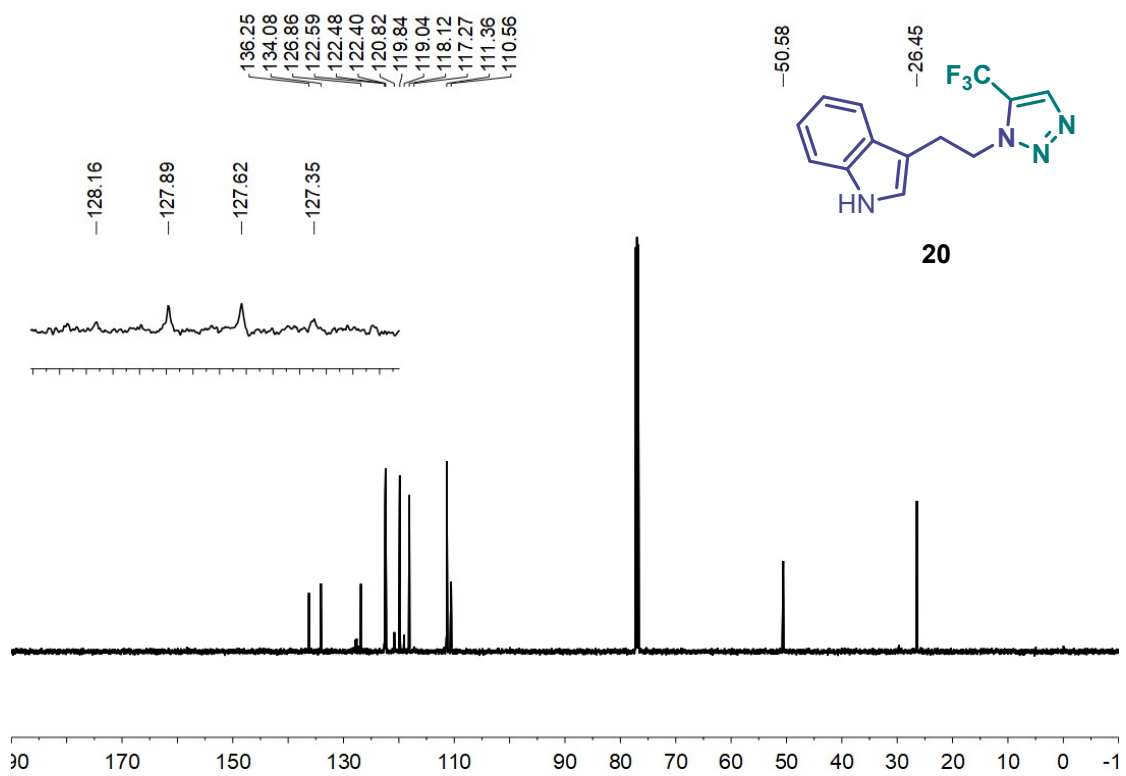

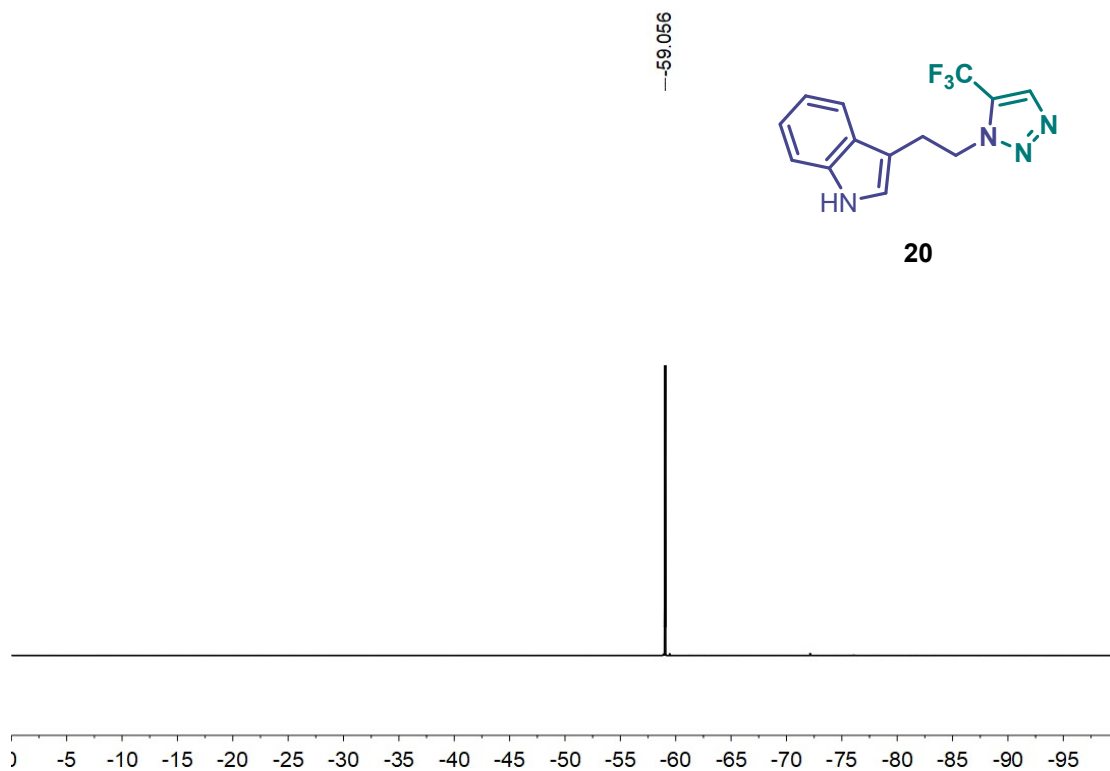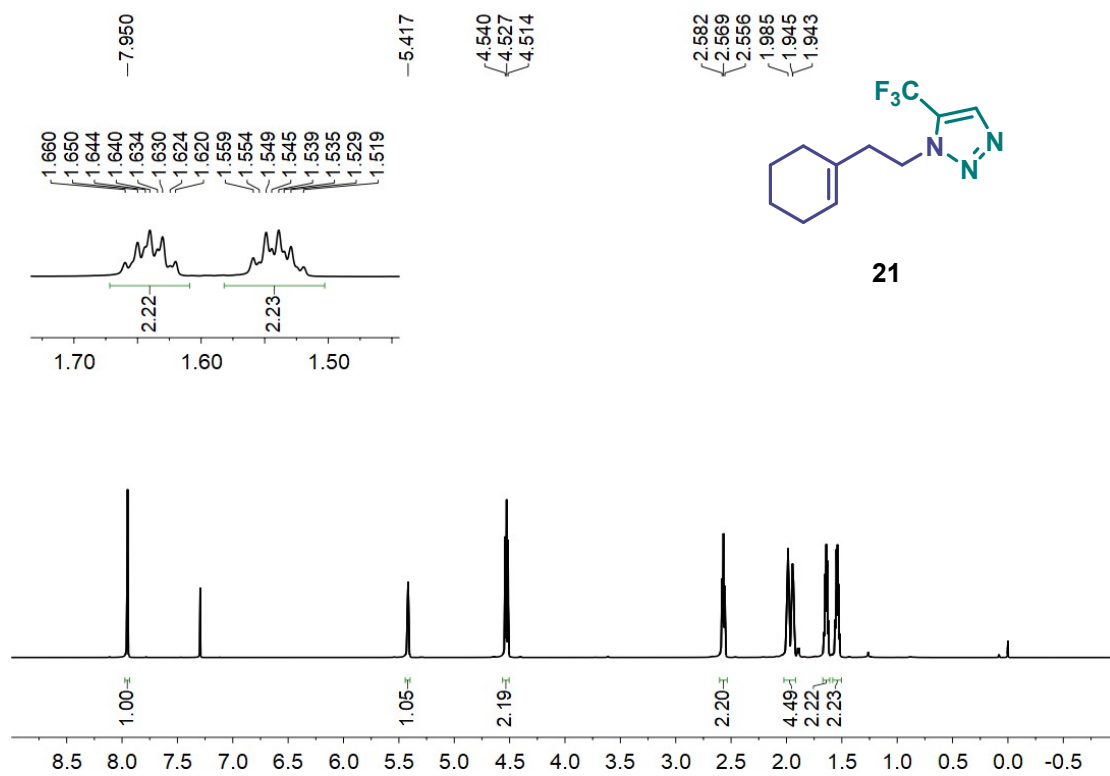



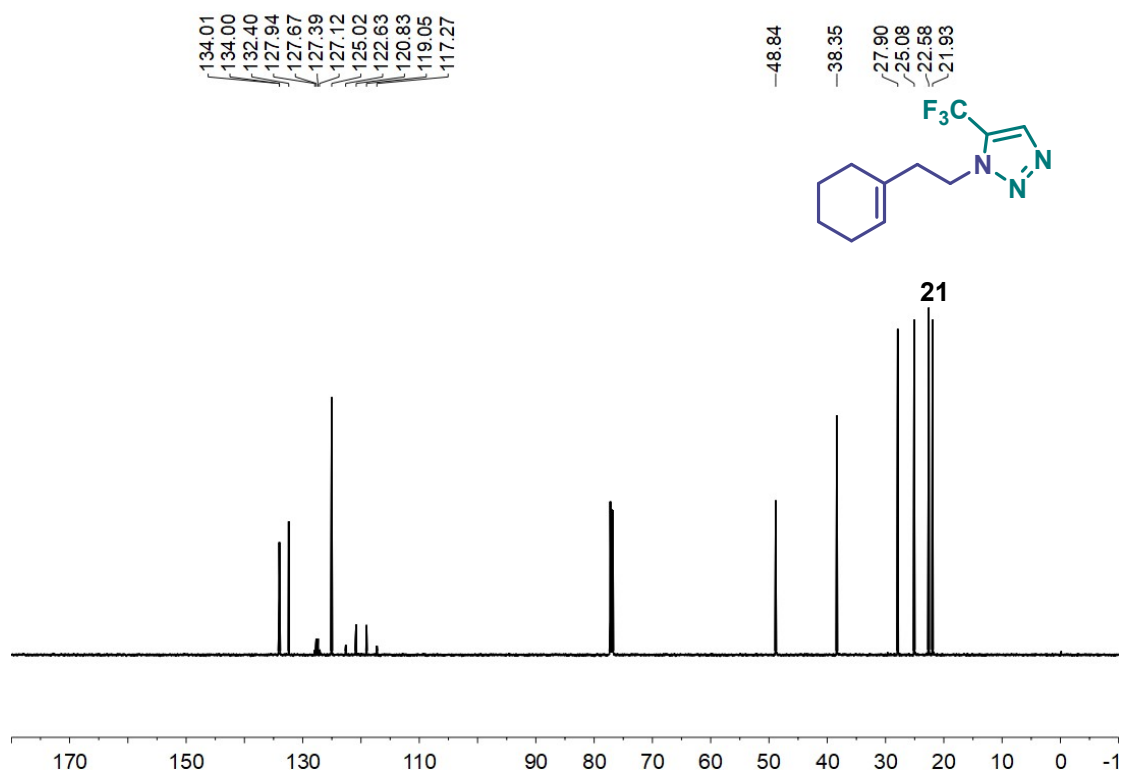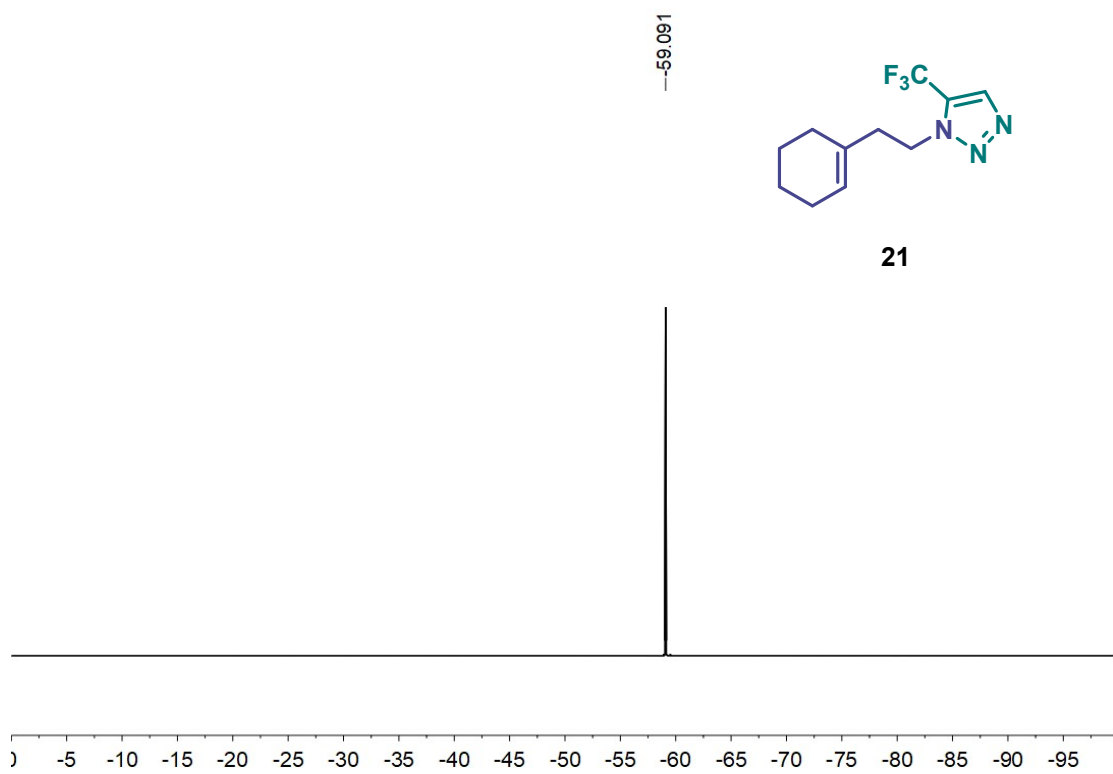

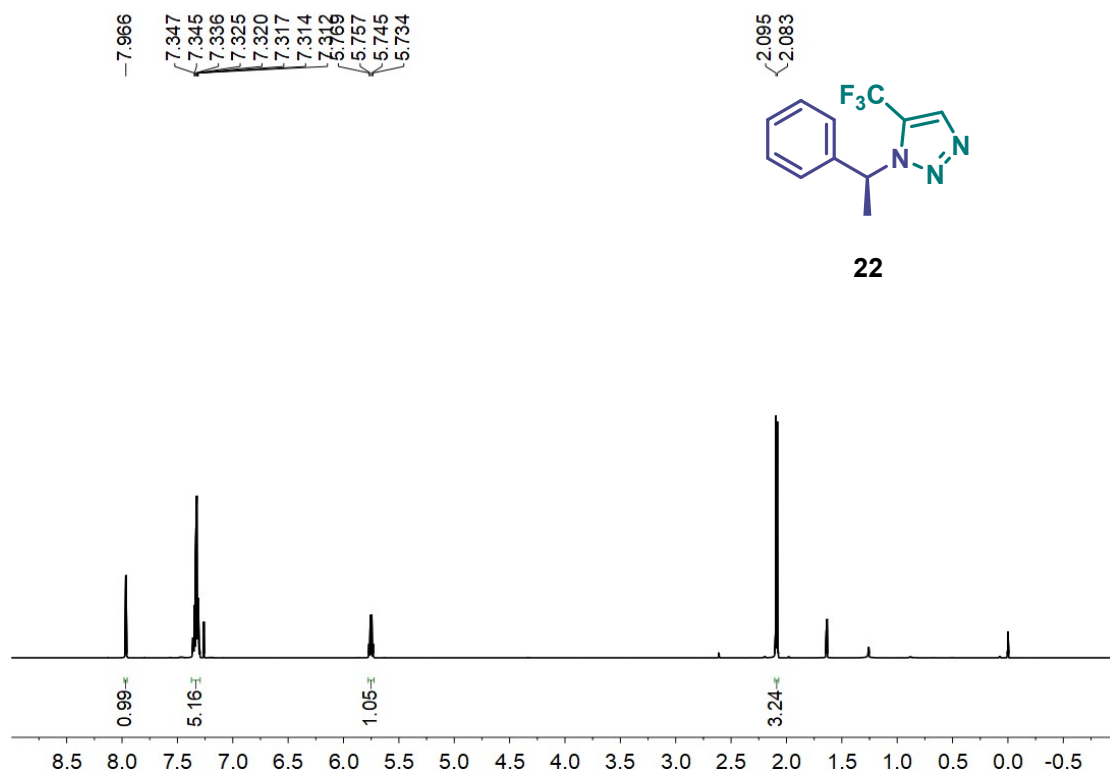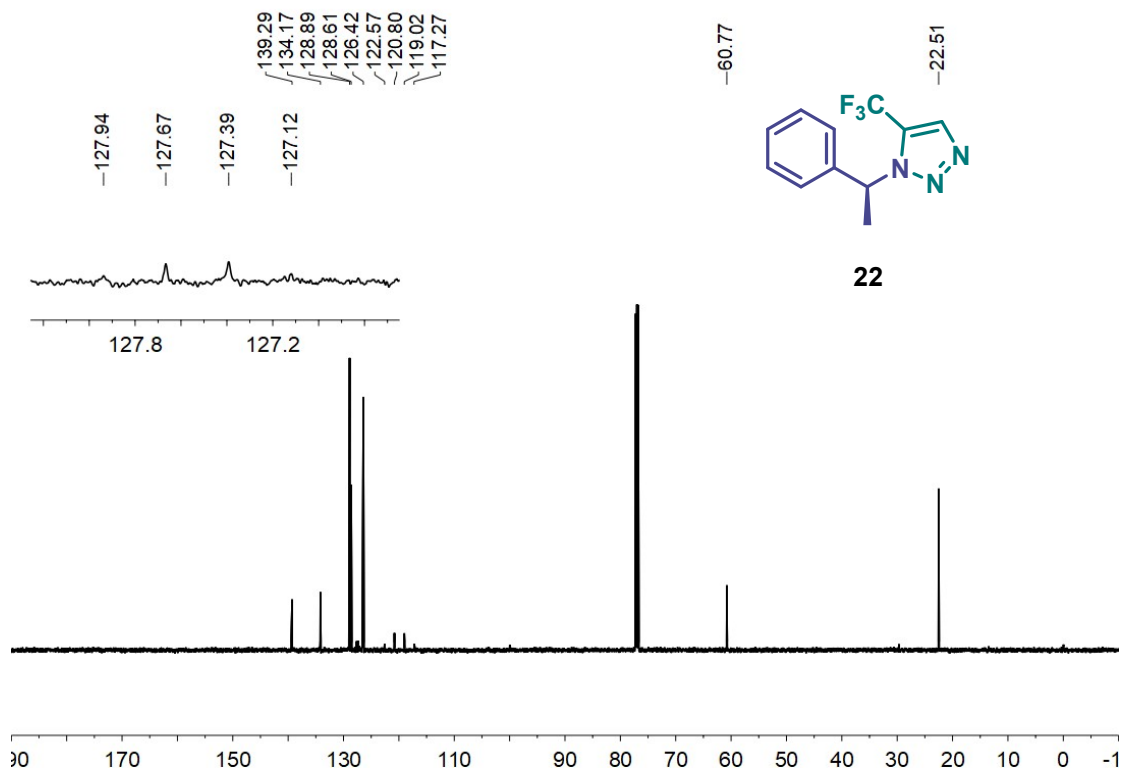

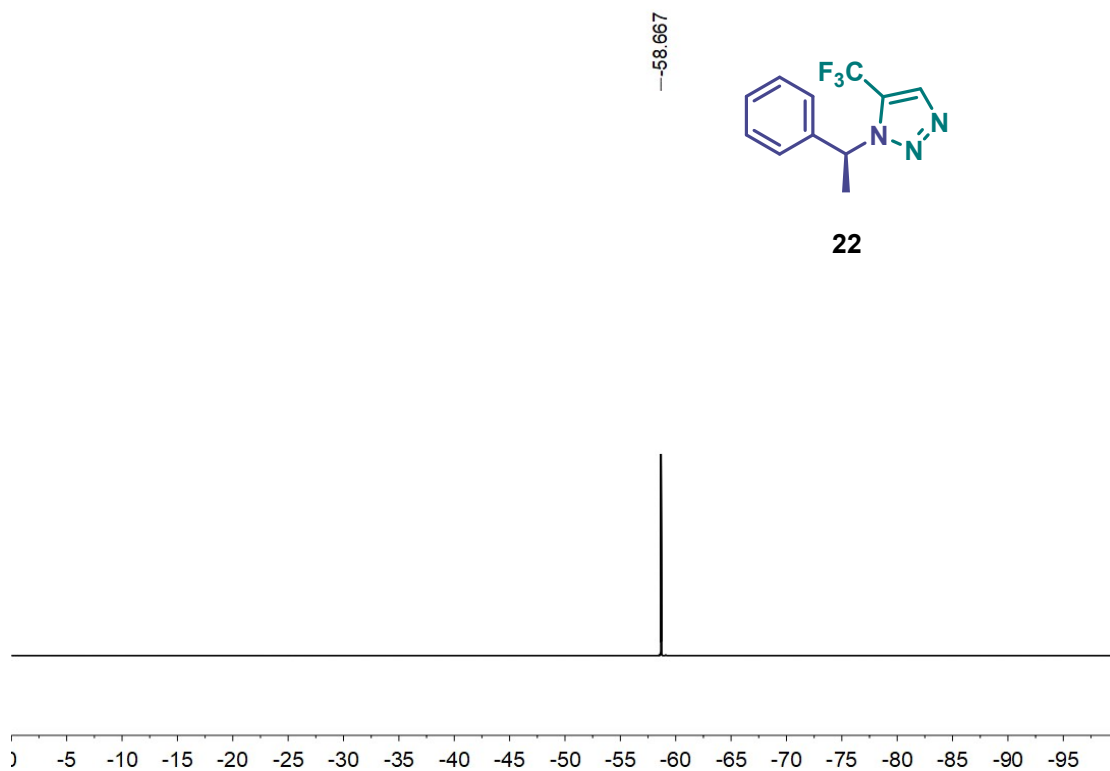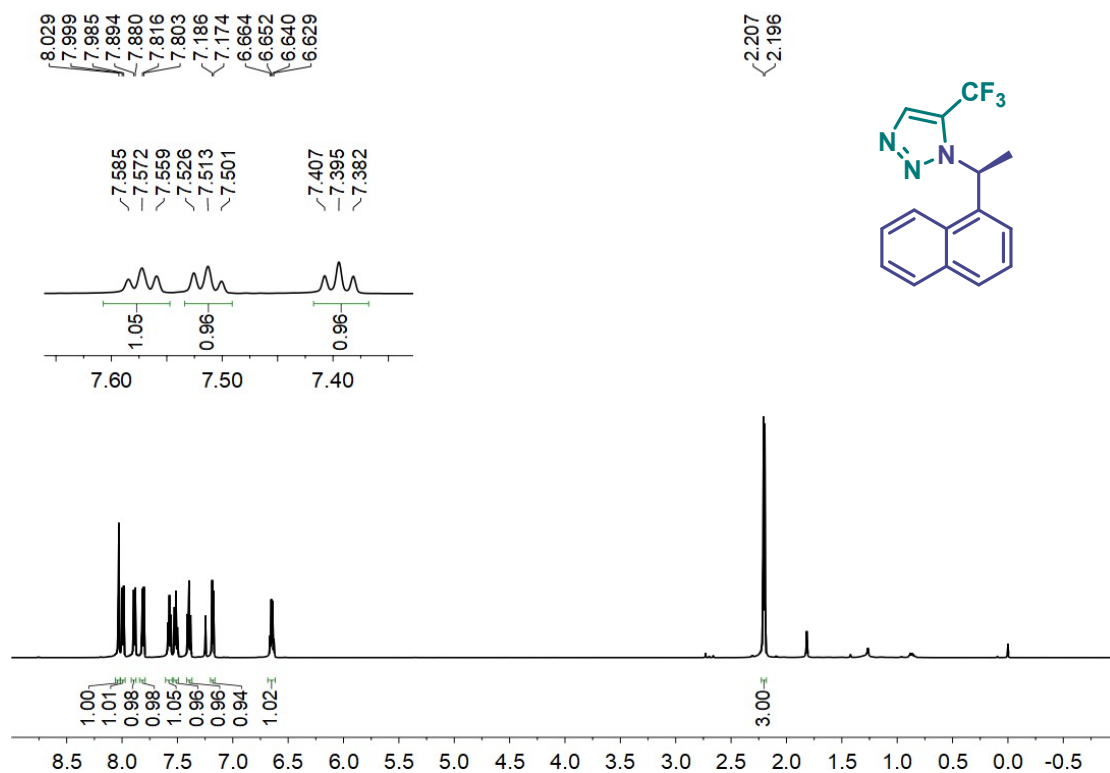



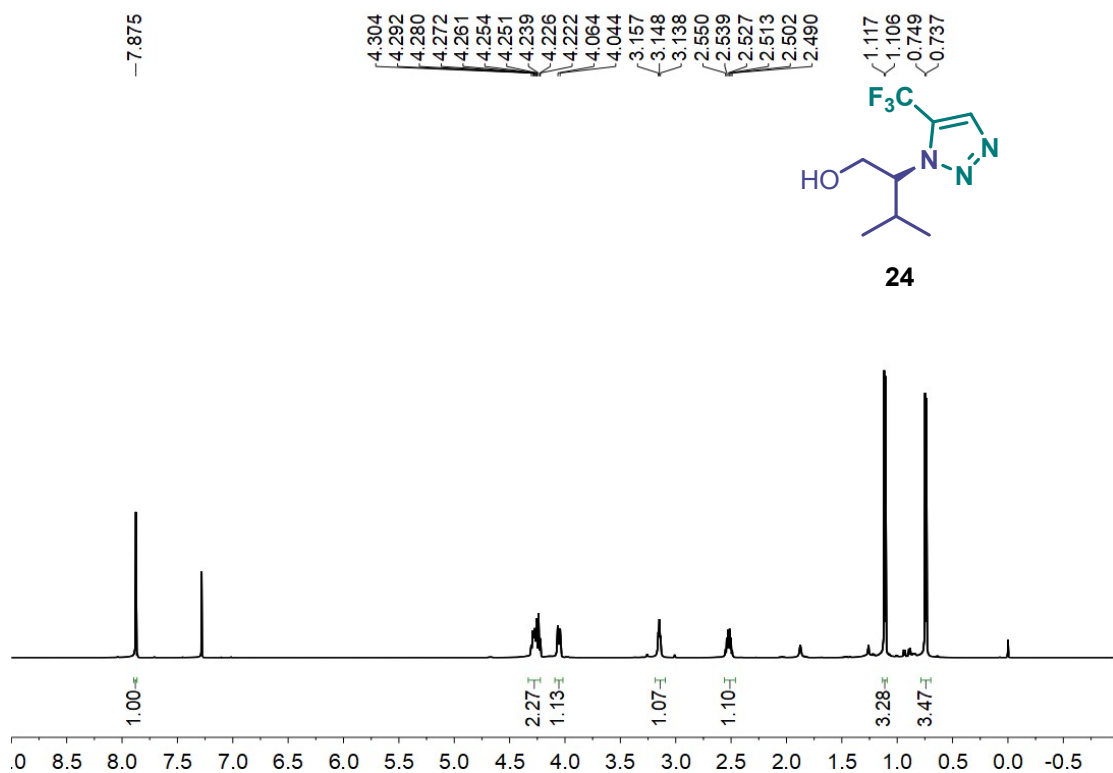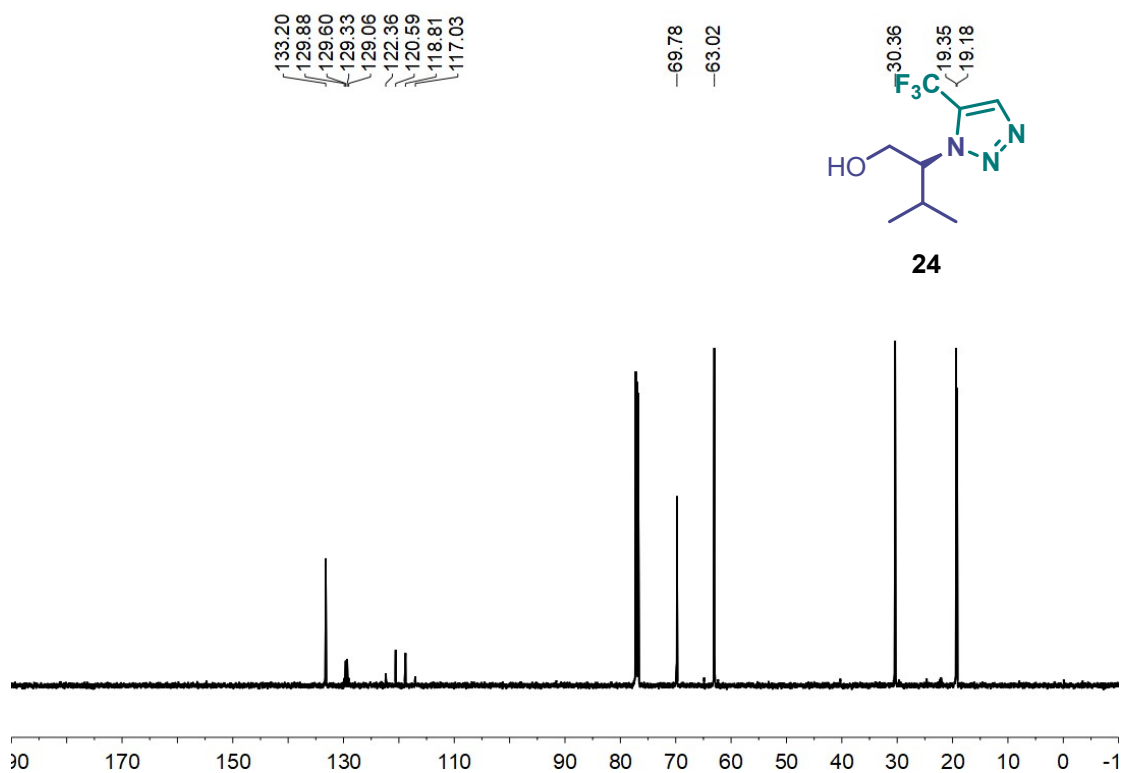

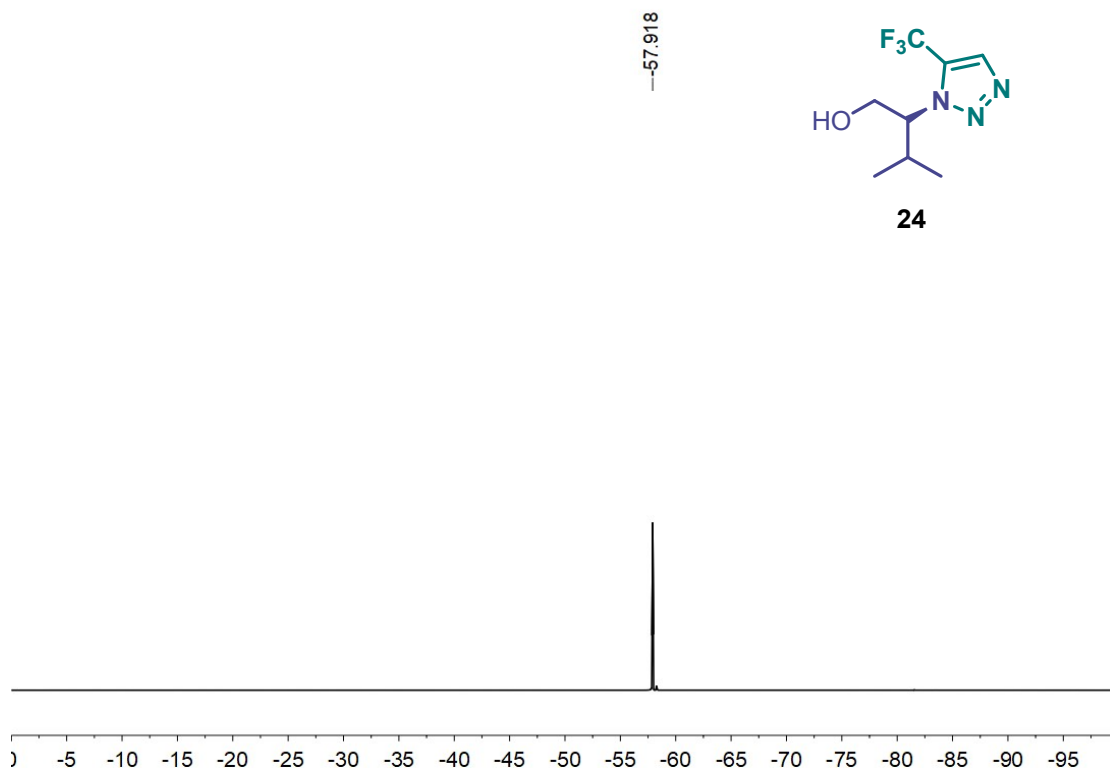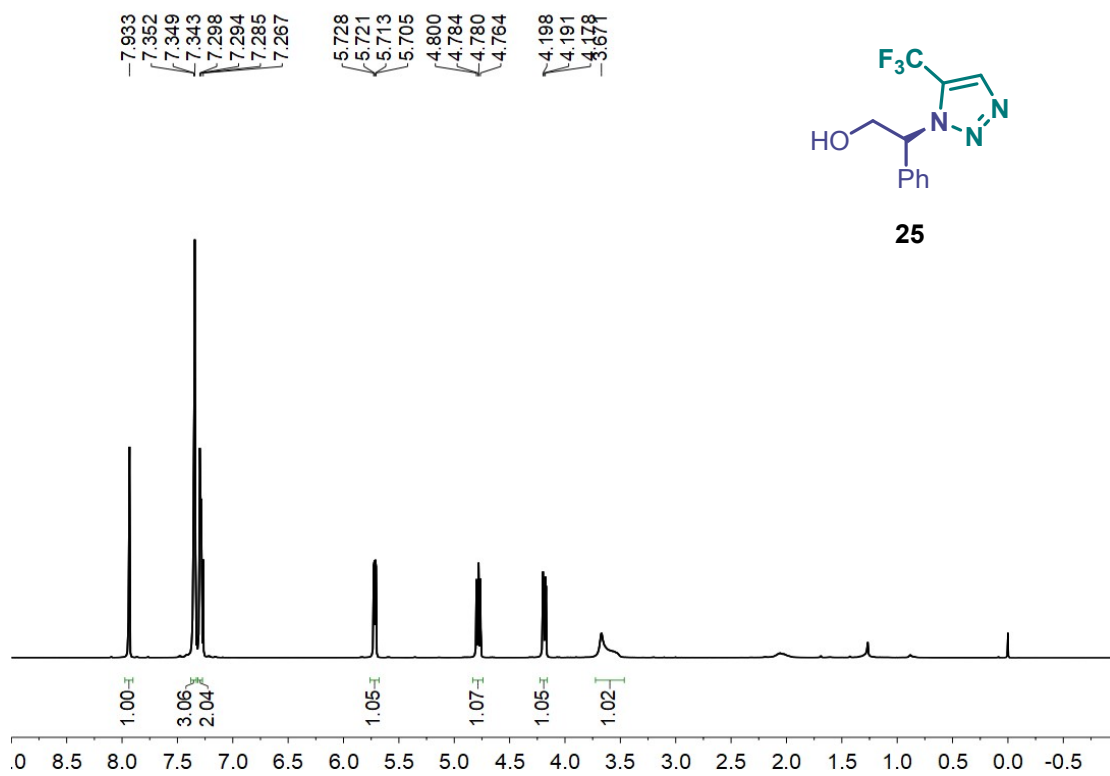

134.85  
134.12  
128.21  
129.07  
128.97  
128.93  
128.66  
128.38  
126.96  
122.24  
120.46  
118.68  
116.90

~67.47  
~64.94

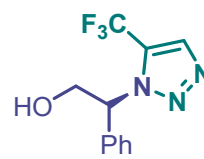

**25**

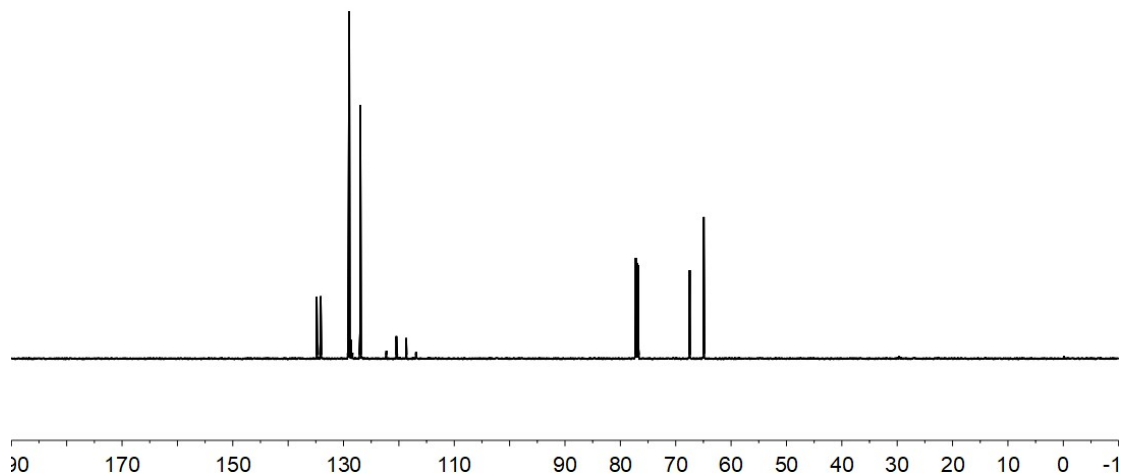

-58.701

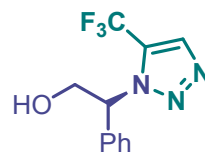

**25**

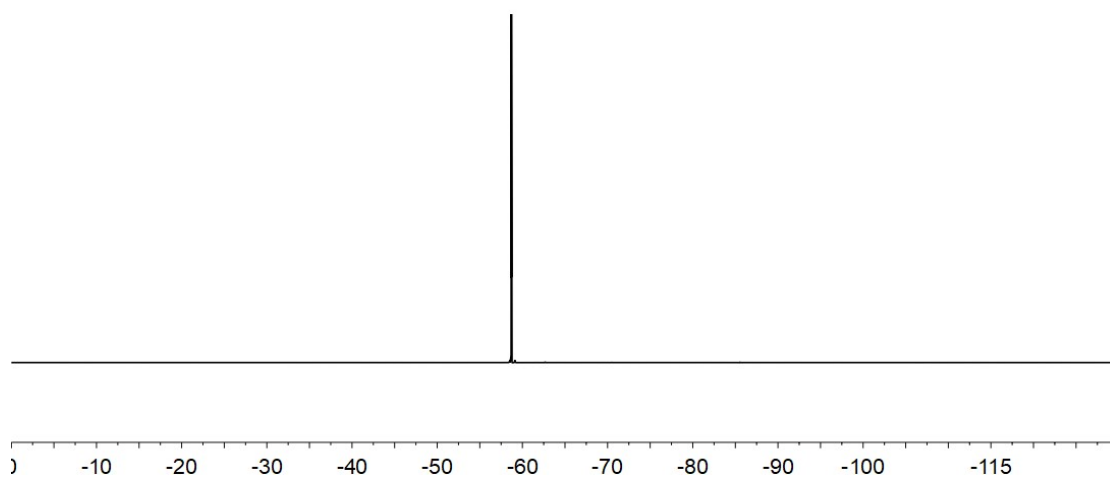

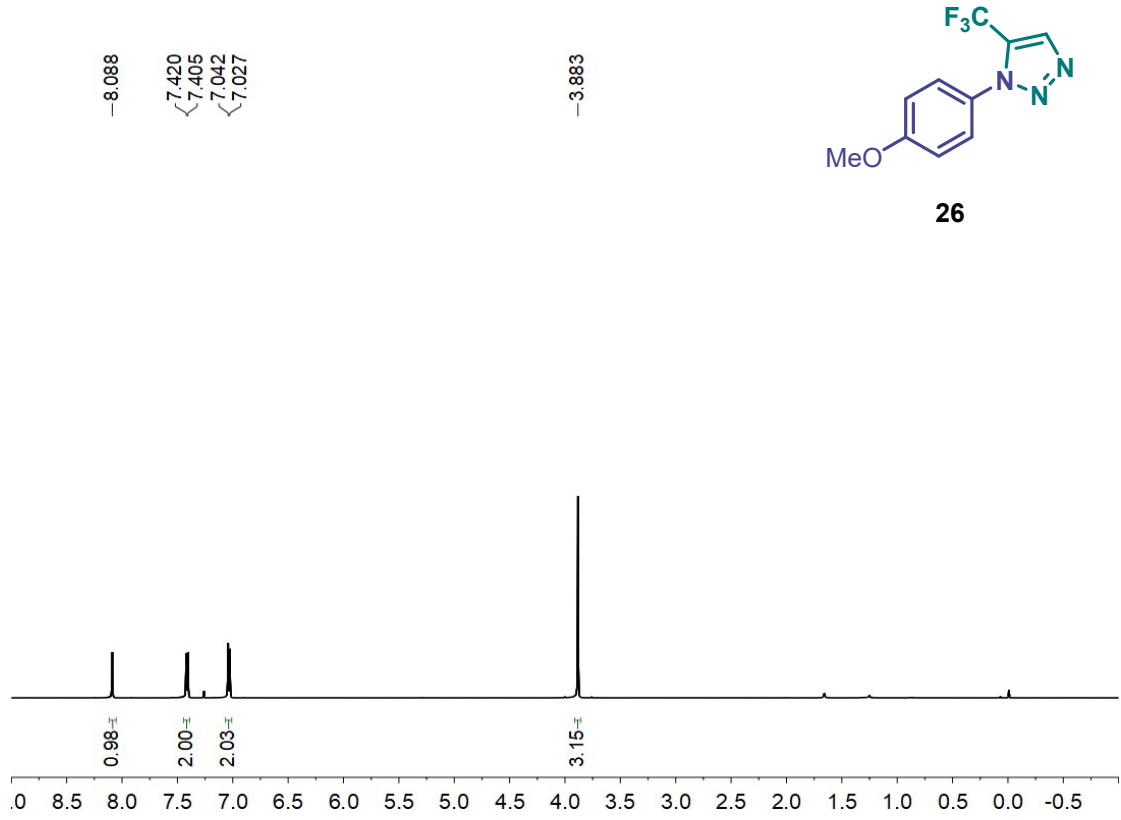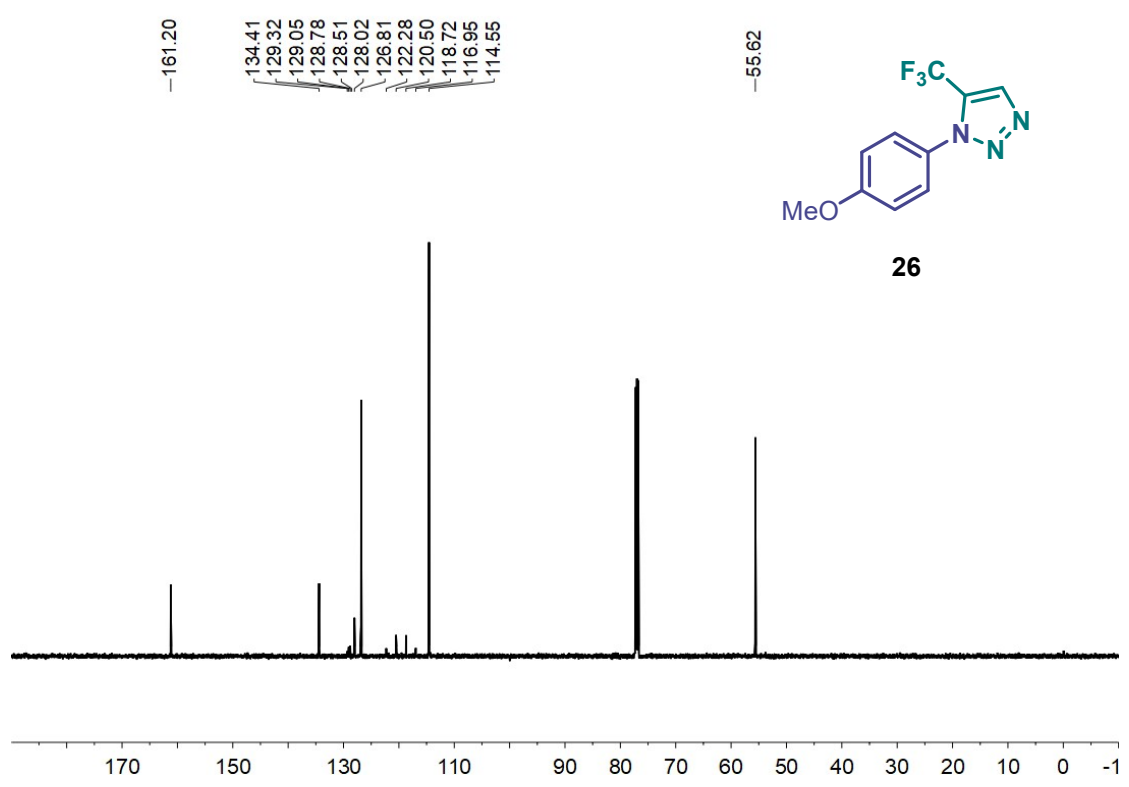



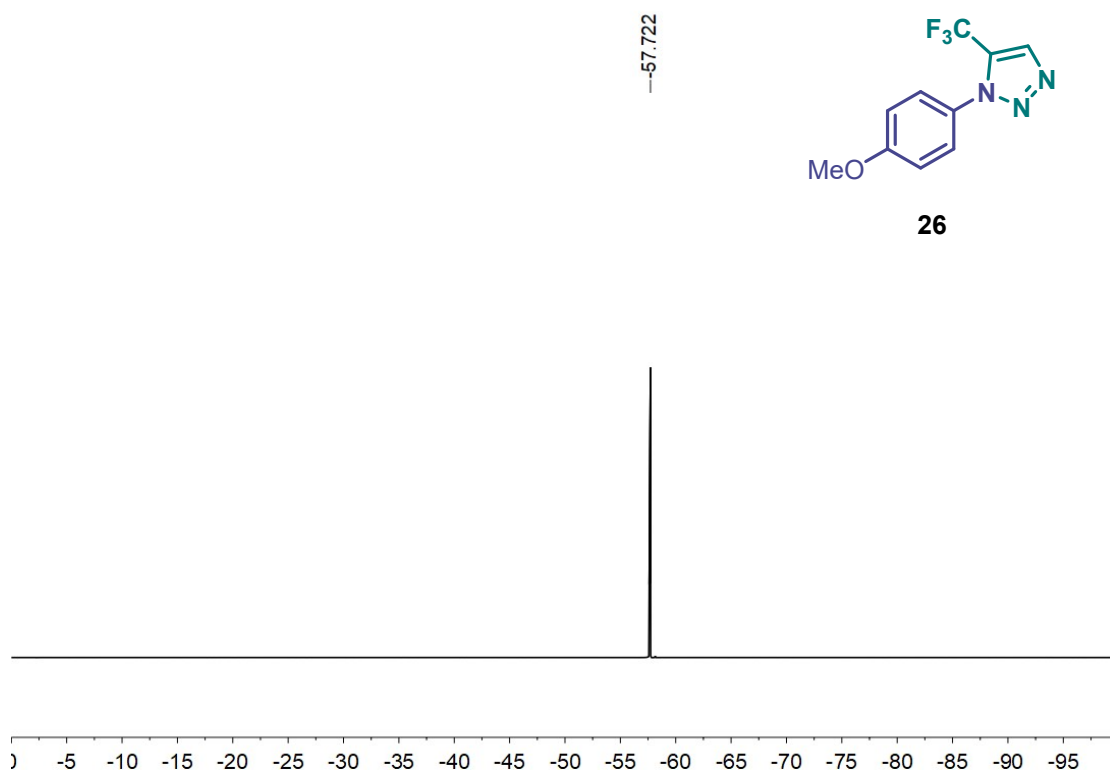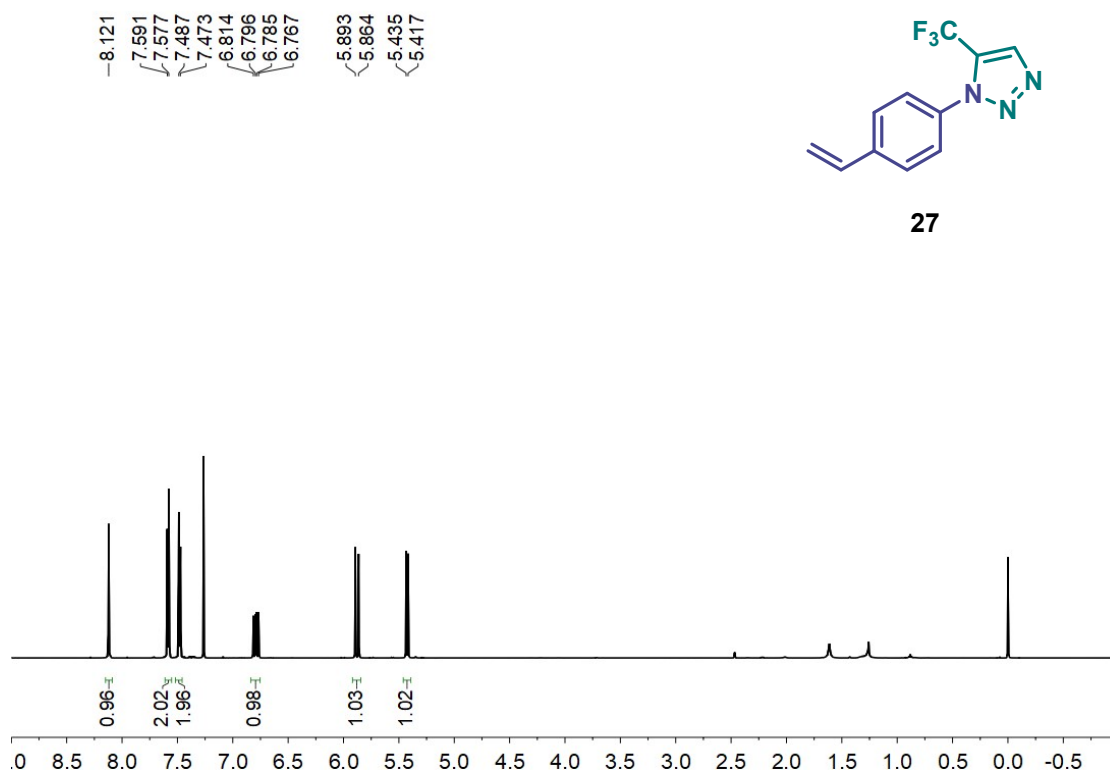

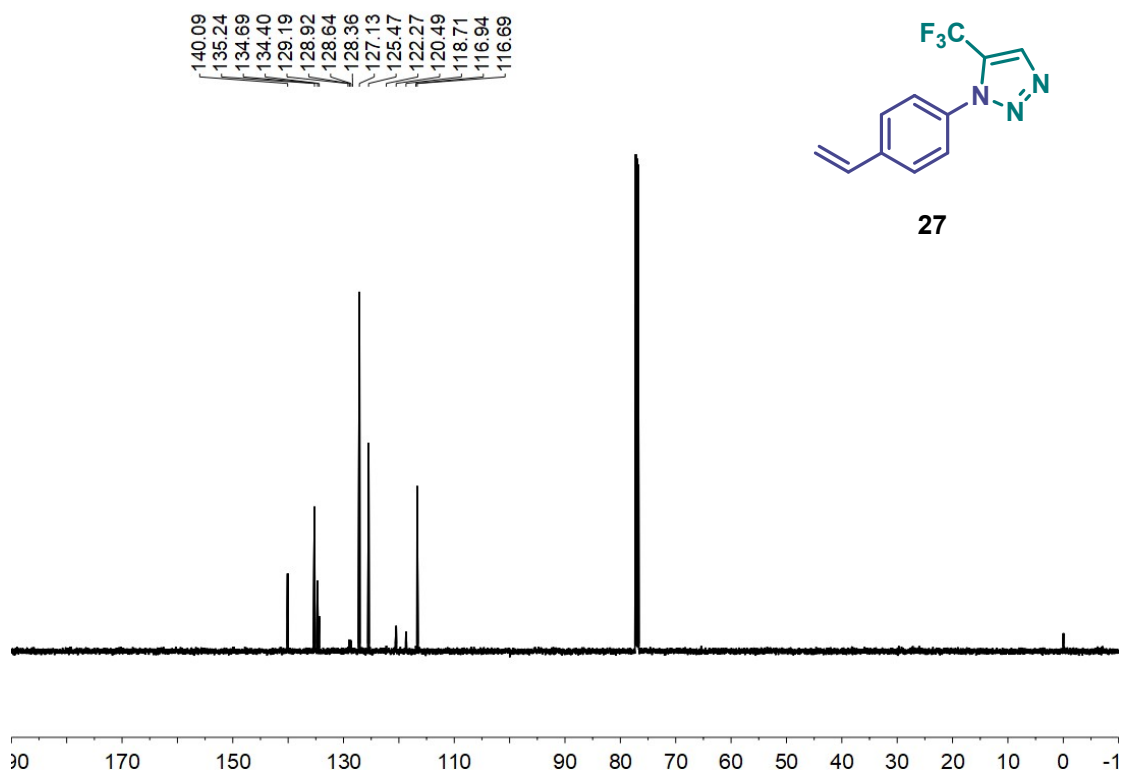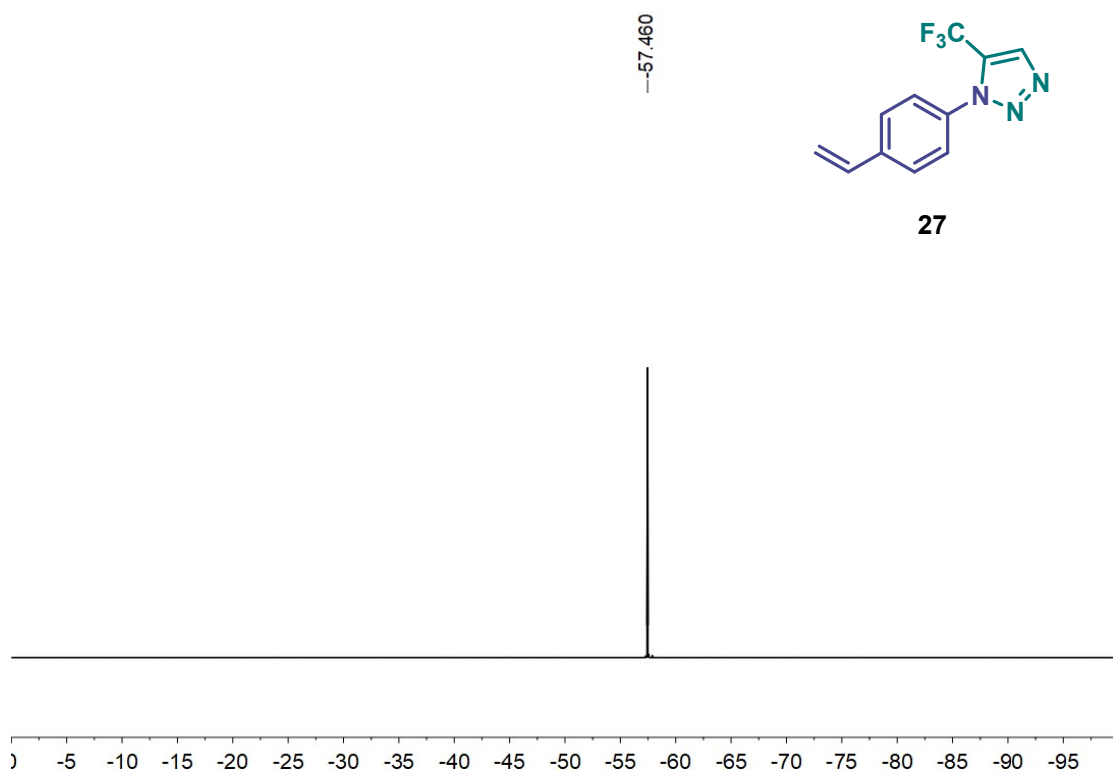

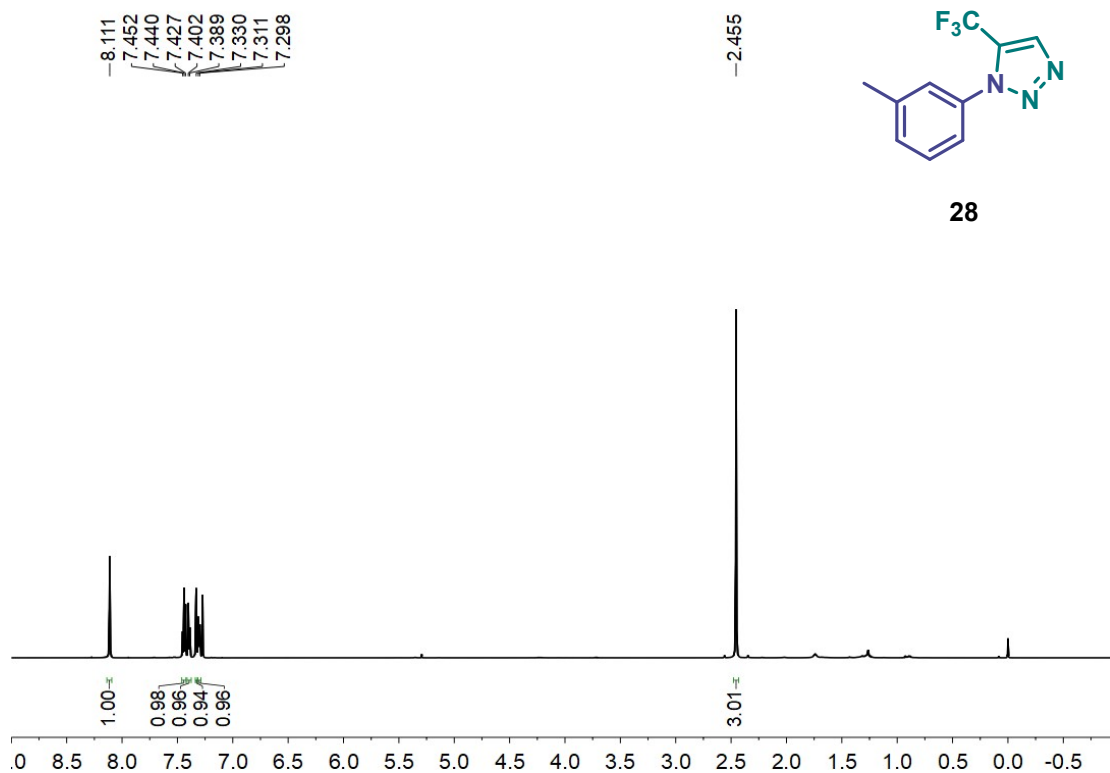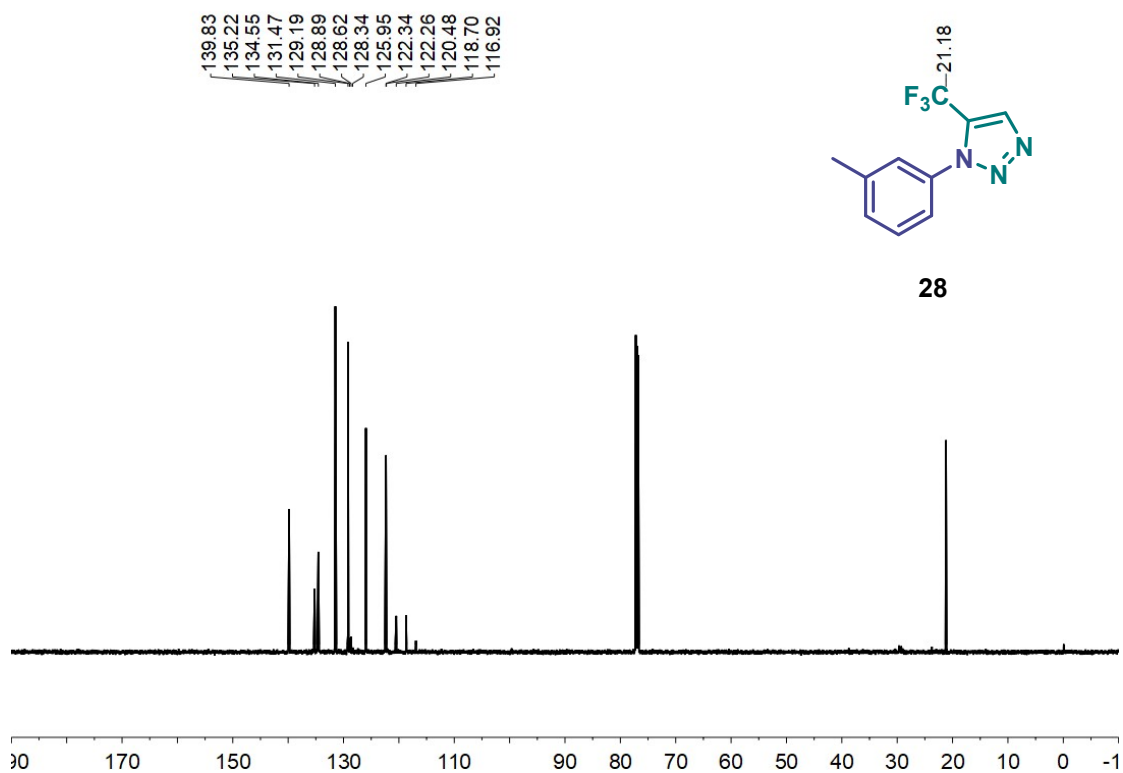

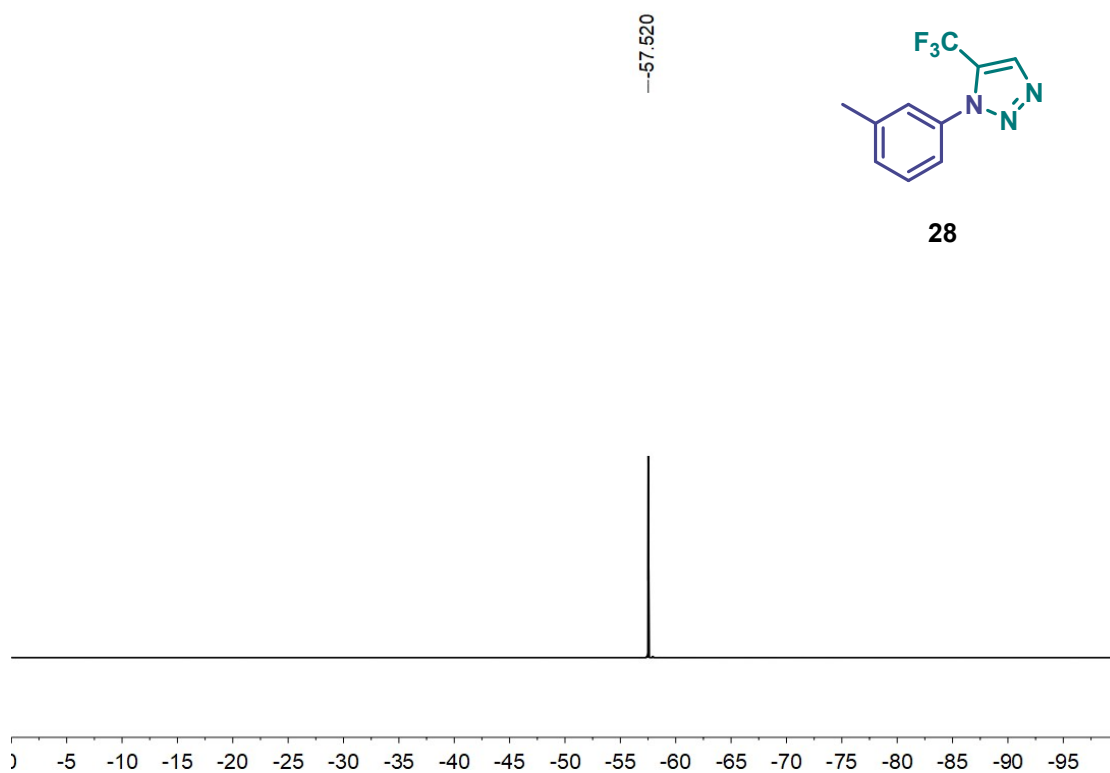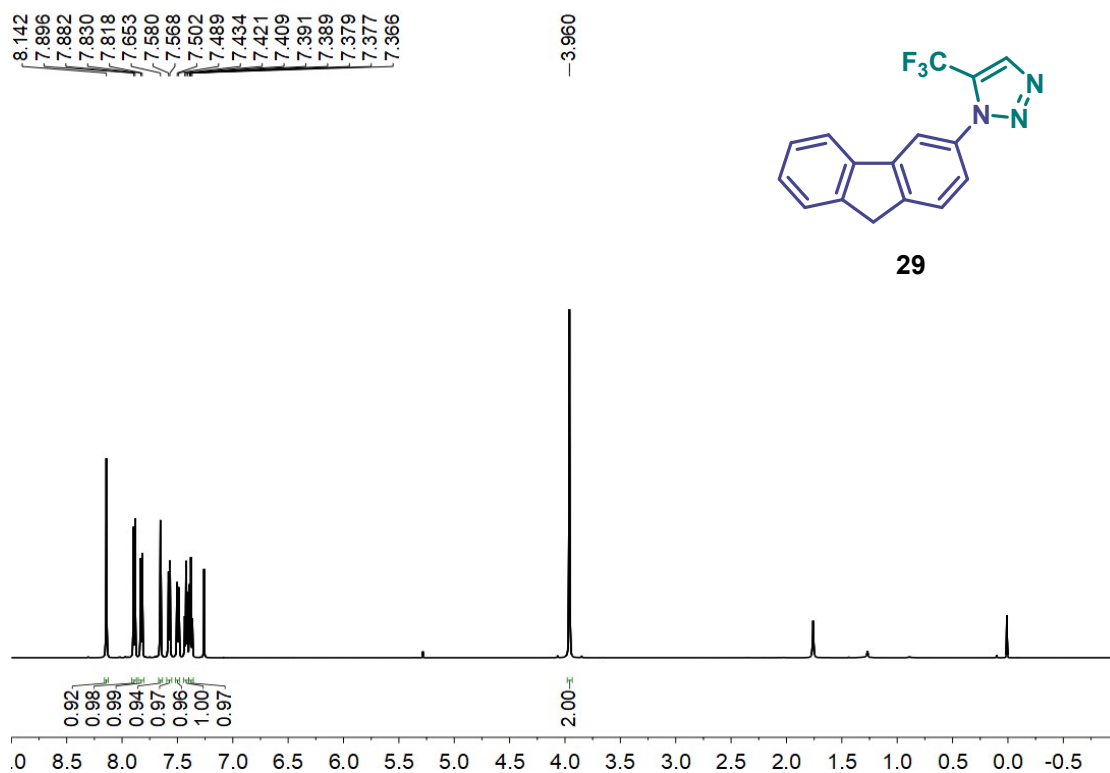

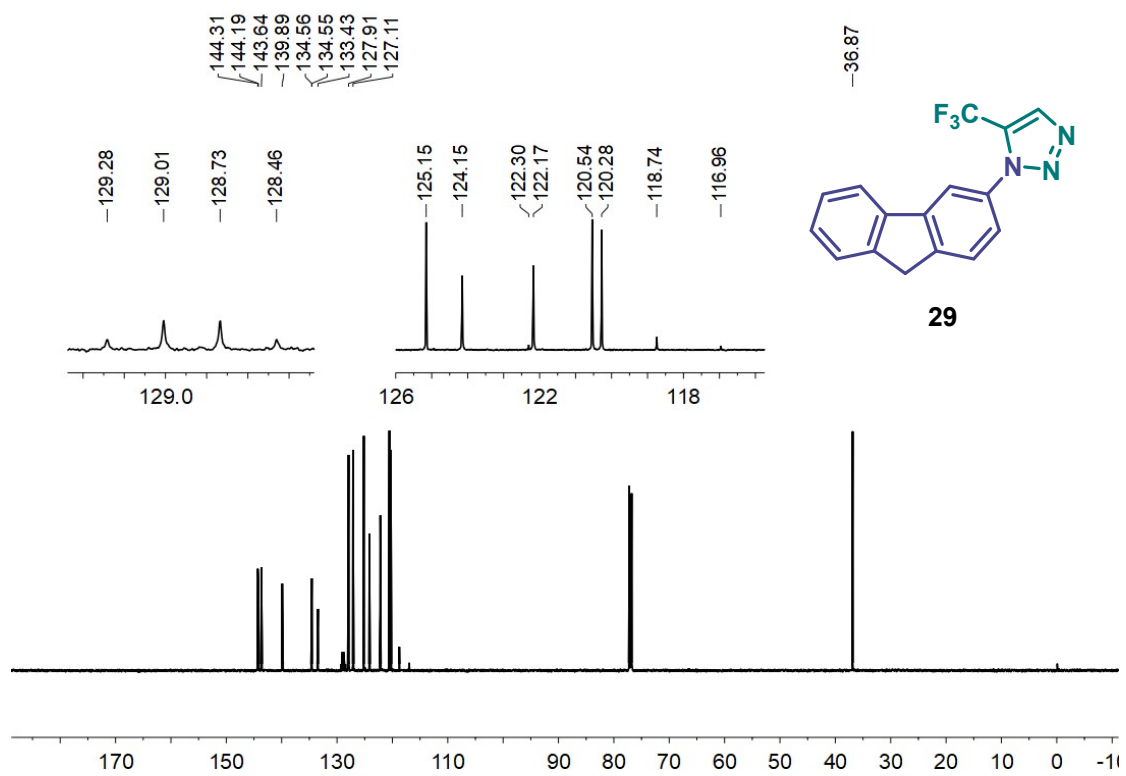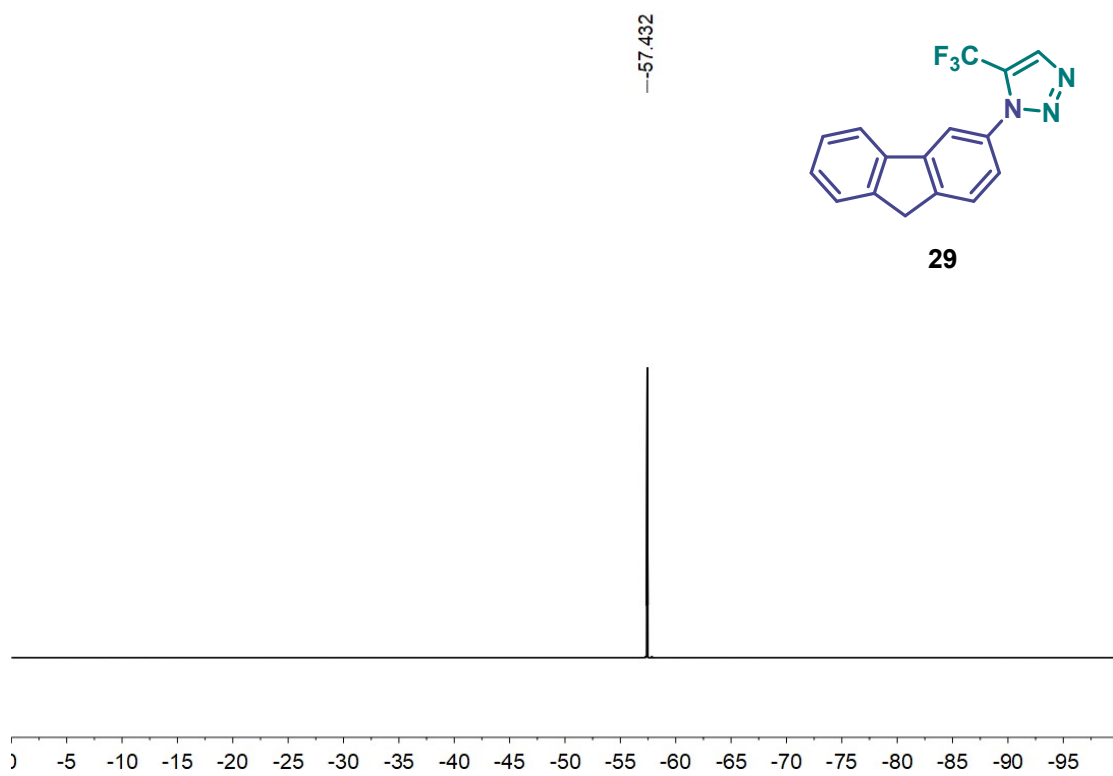

8.168  
8.022  
8.008  
7.956  
7.940  
7.927  
7.642  
7.639  
7.630  
7.628  
7.622  
7.619  
7.615  
7.610  
7.607  
7.598  
7.585  
7.582  
7.571  
7.567

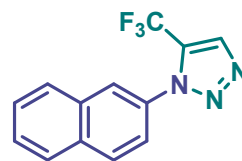

30

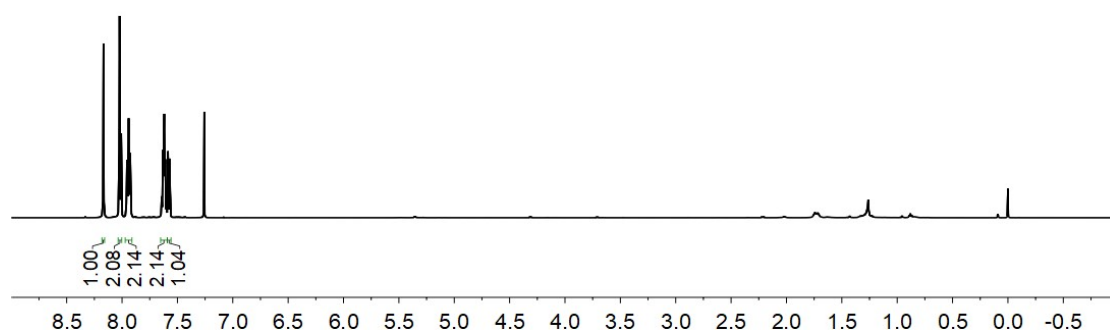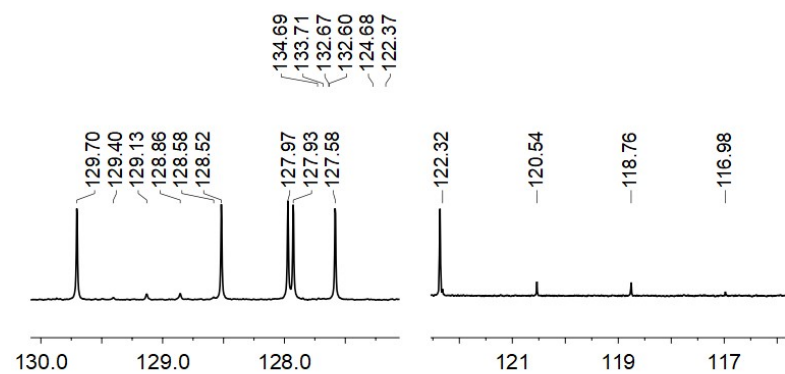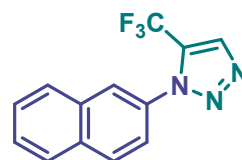

30

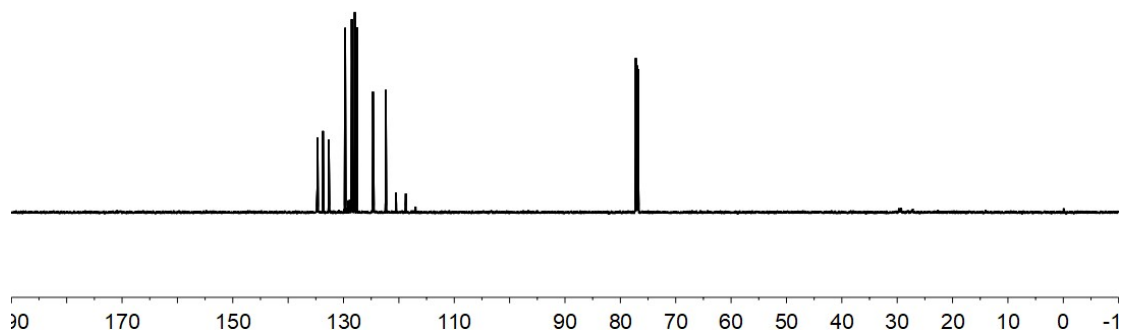

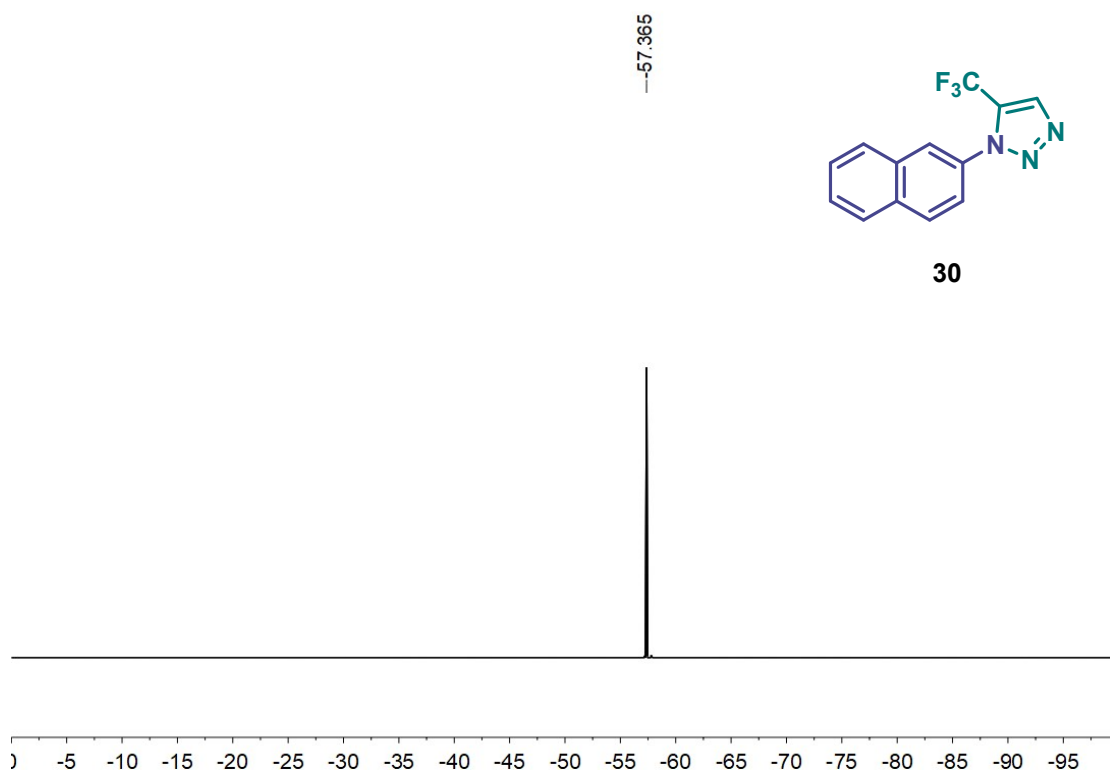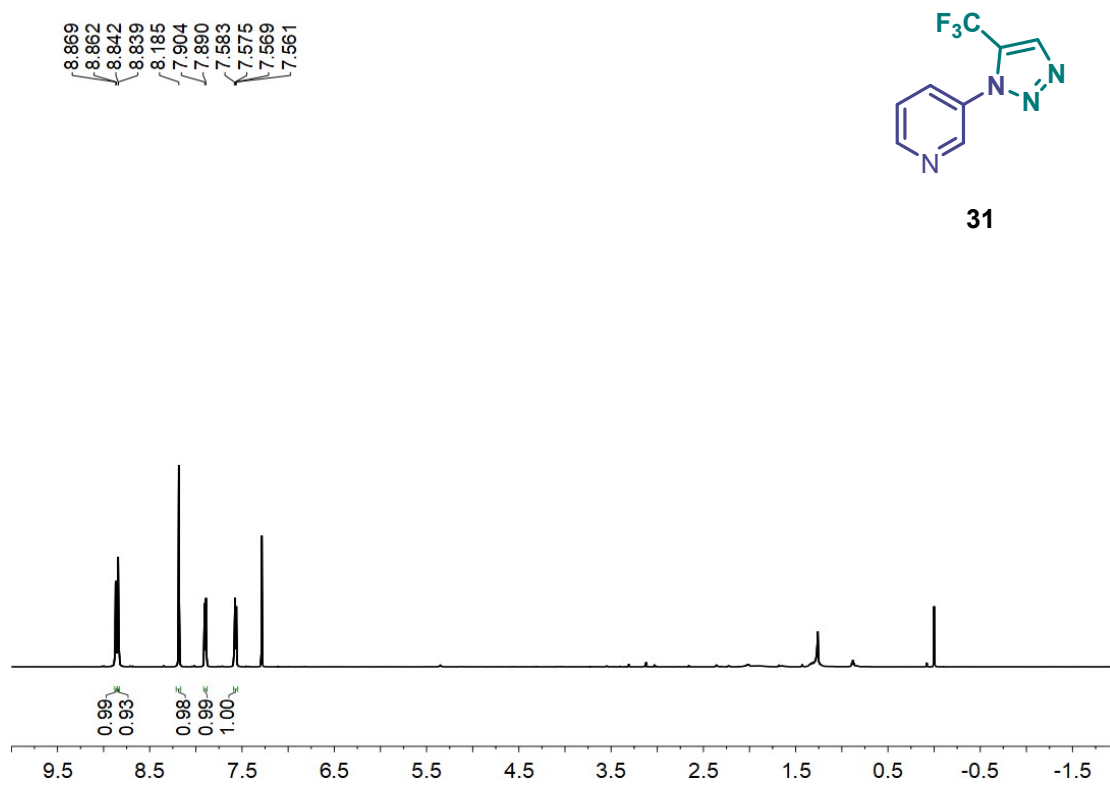

151.83  
146.00  
134.94  
132.78  
132.19  
129.55  
128.28  
129.00  
128.73  
123.96  
122.05  
120.27  
118.49  
116.71

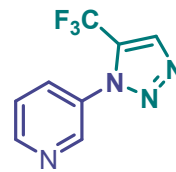

31

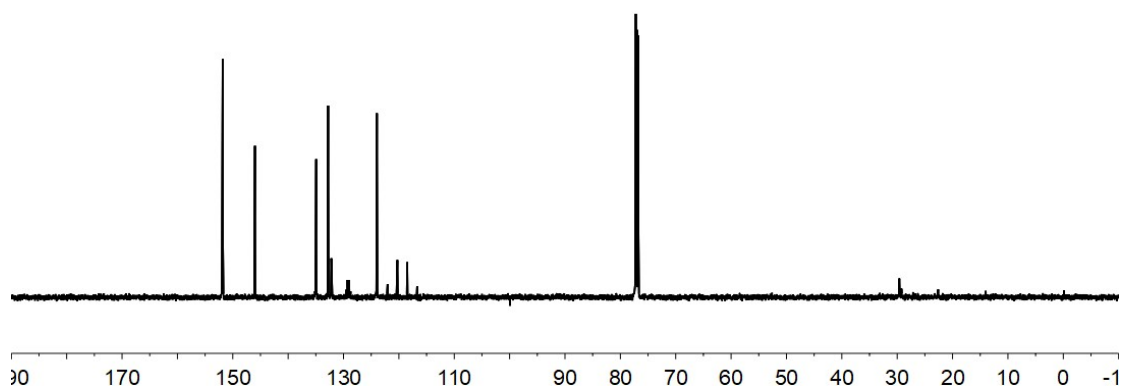

-60.542

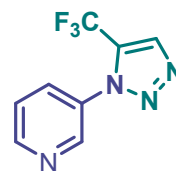

31

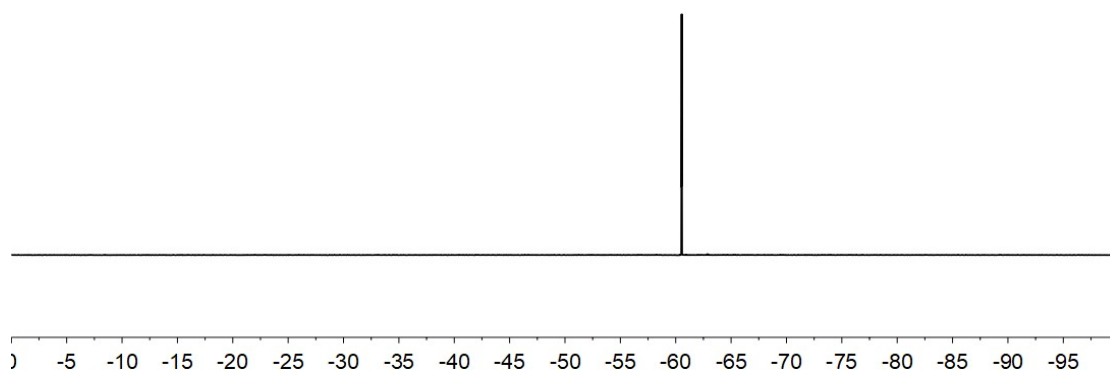



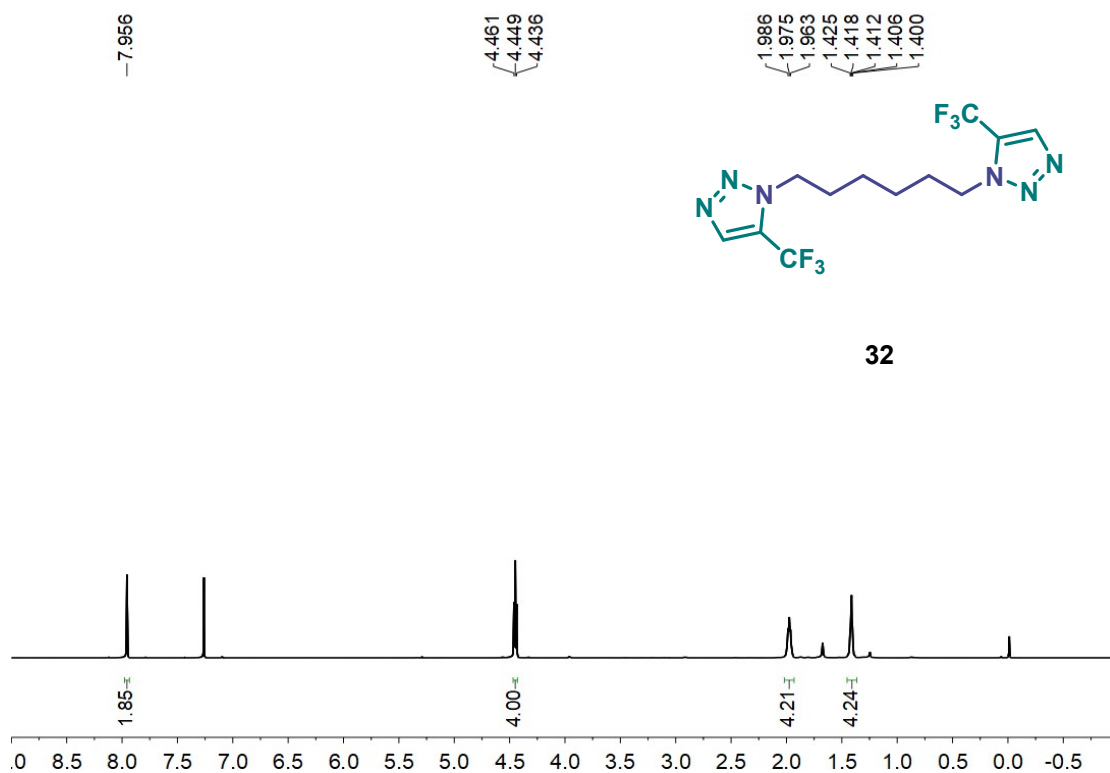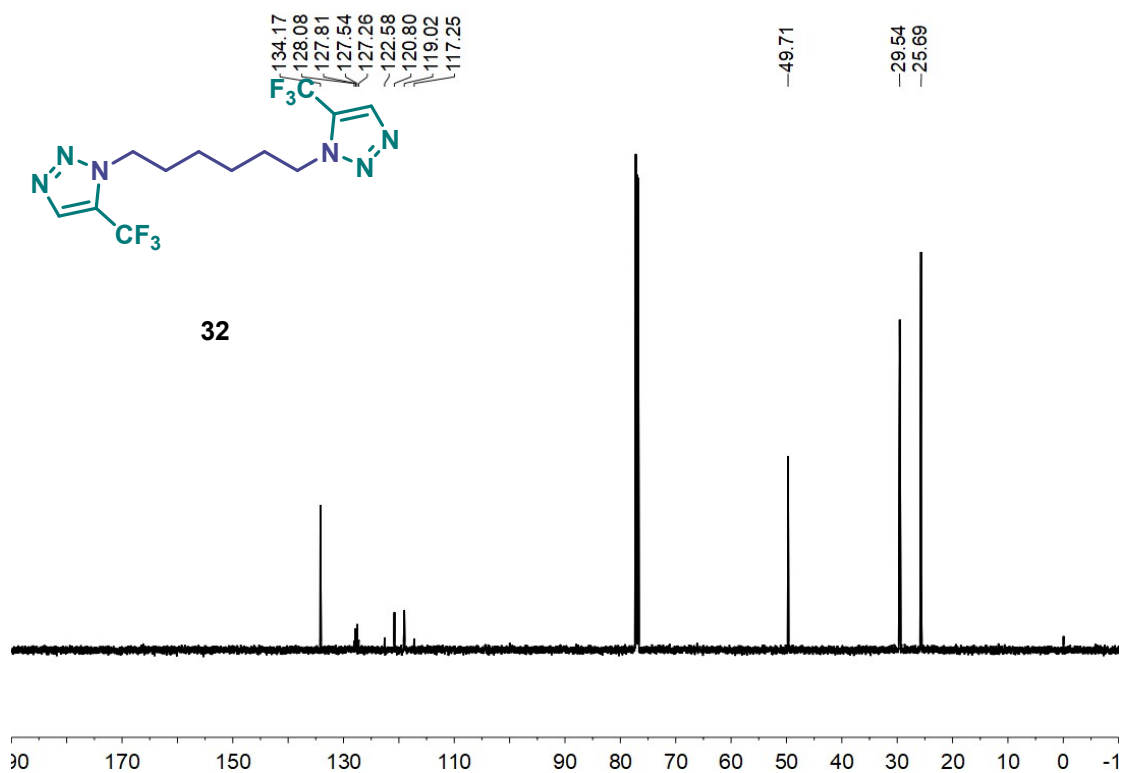

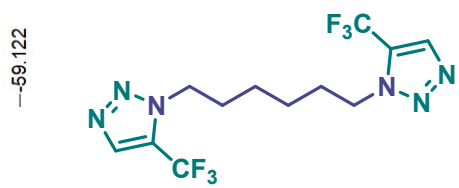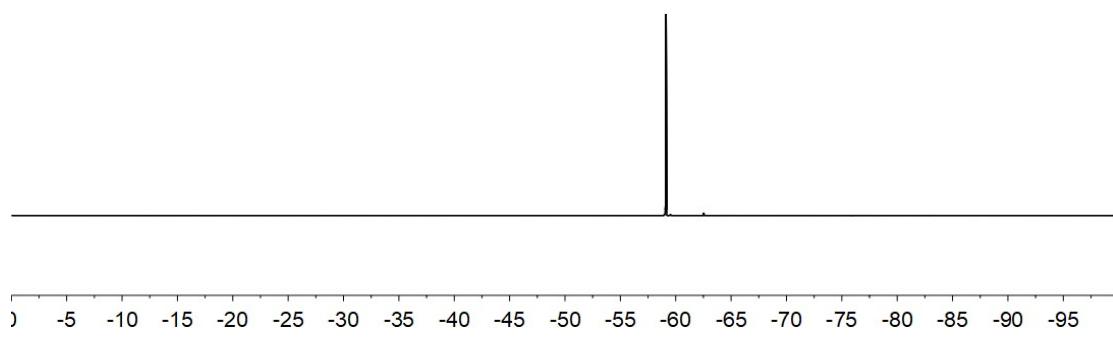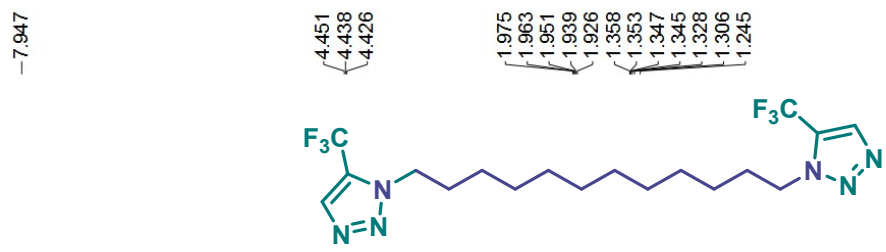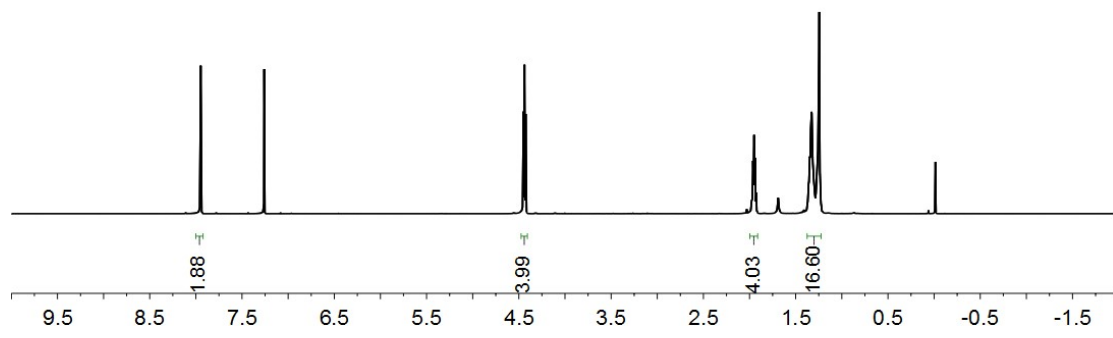

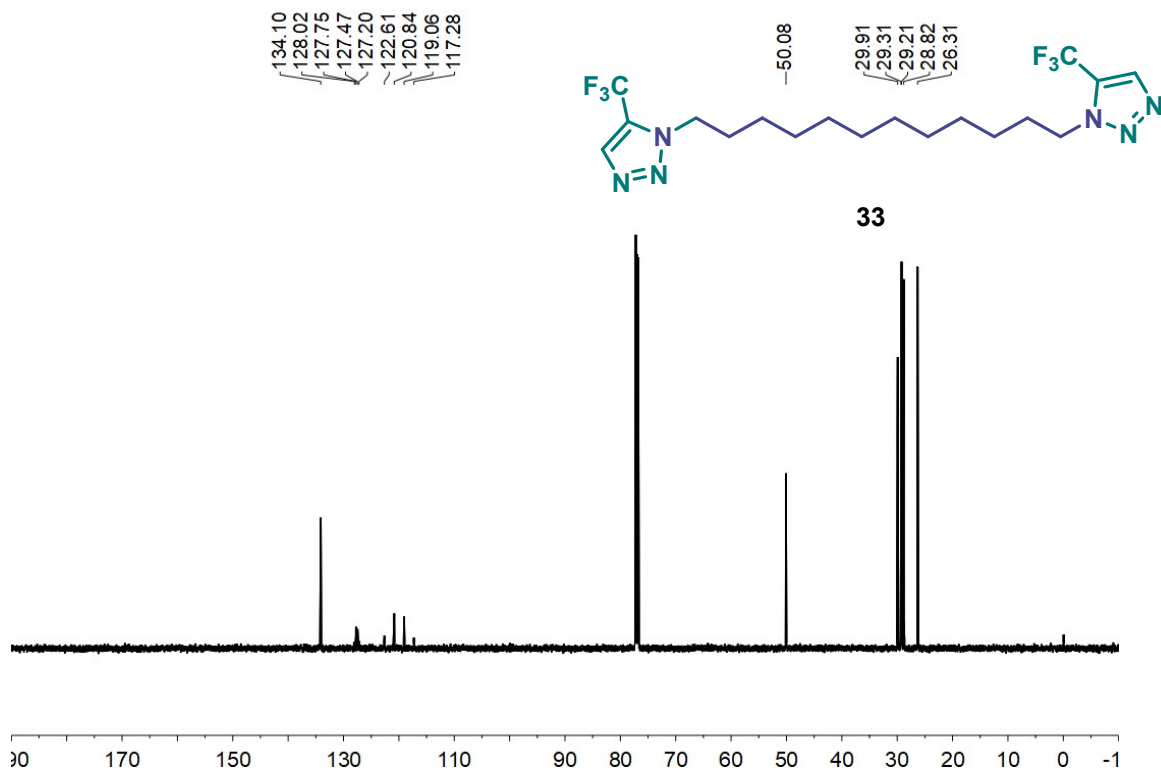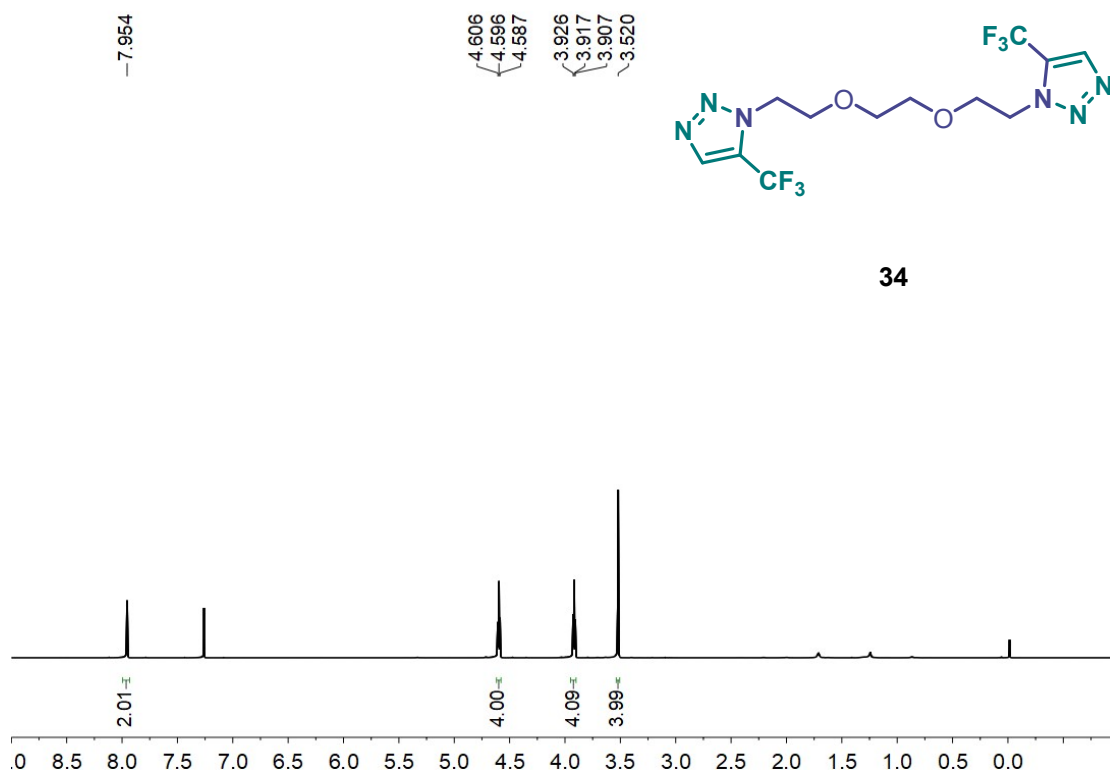

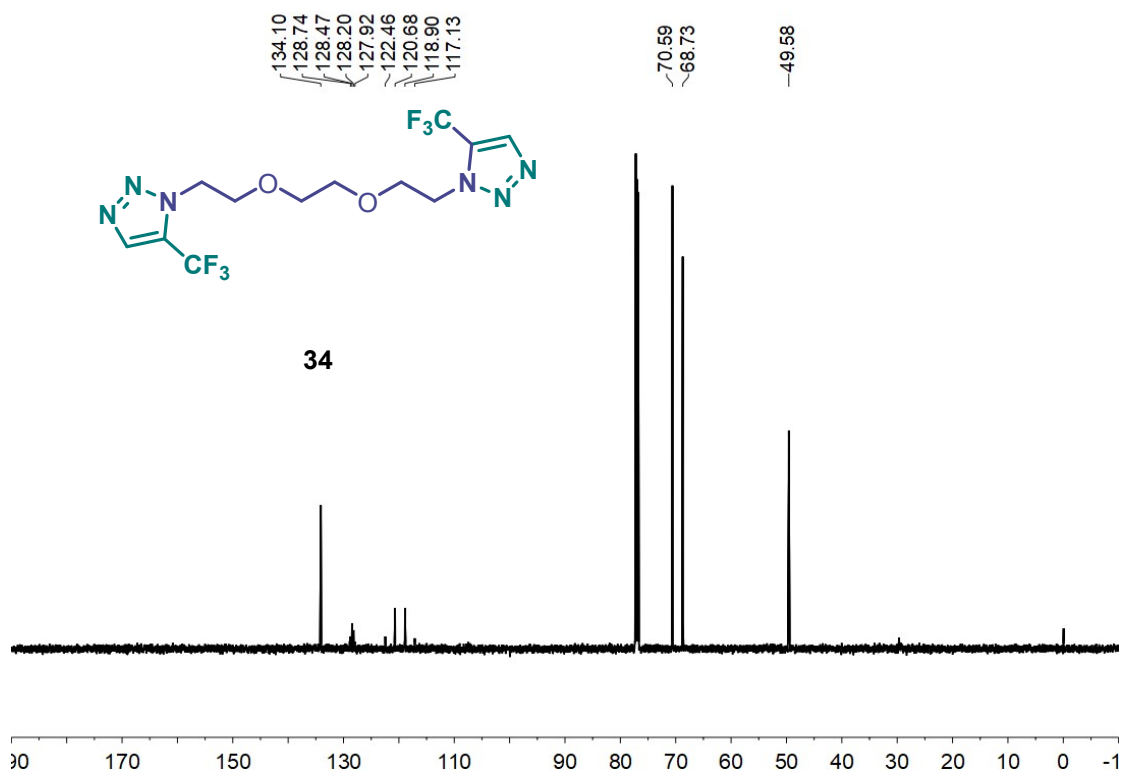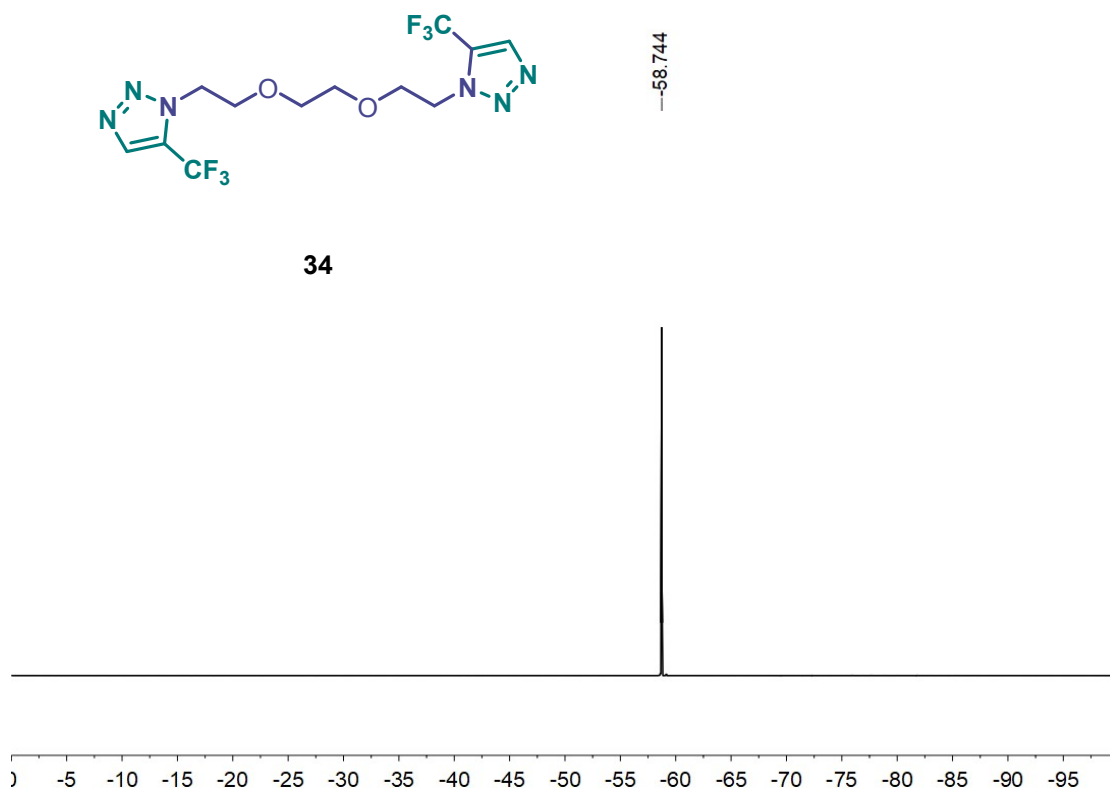

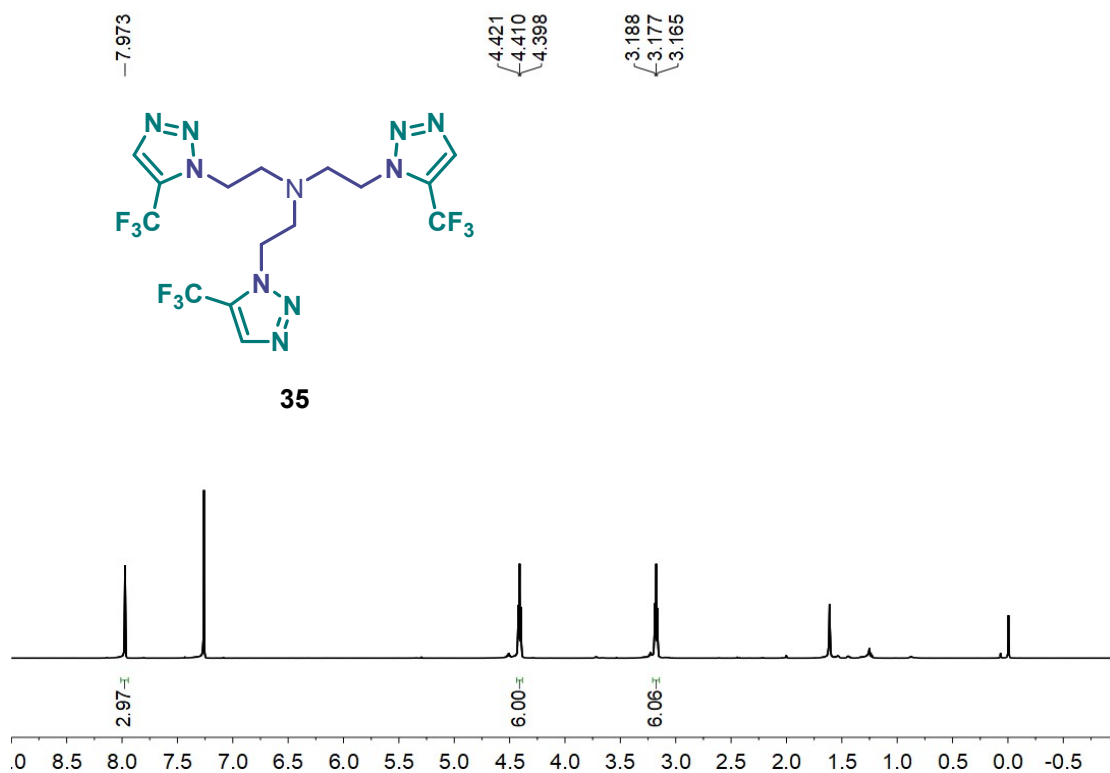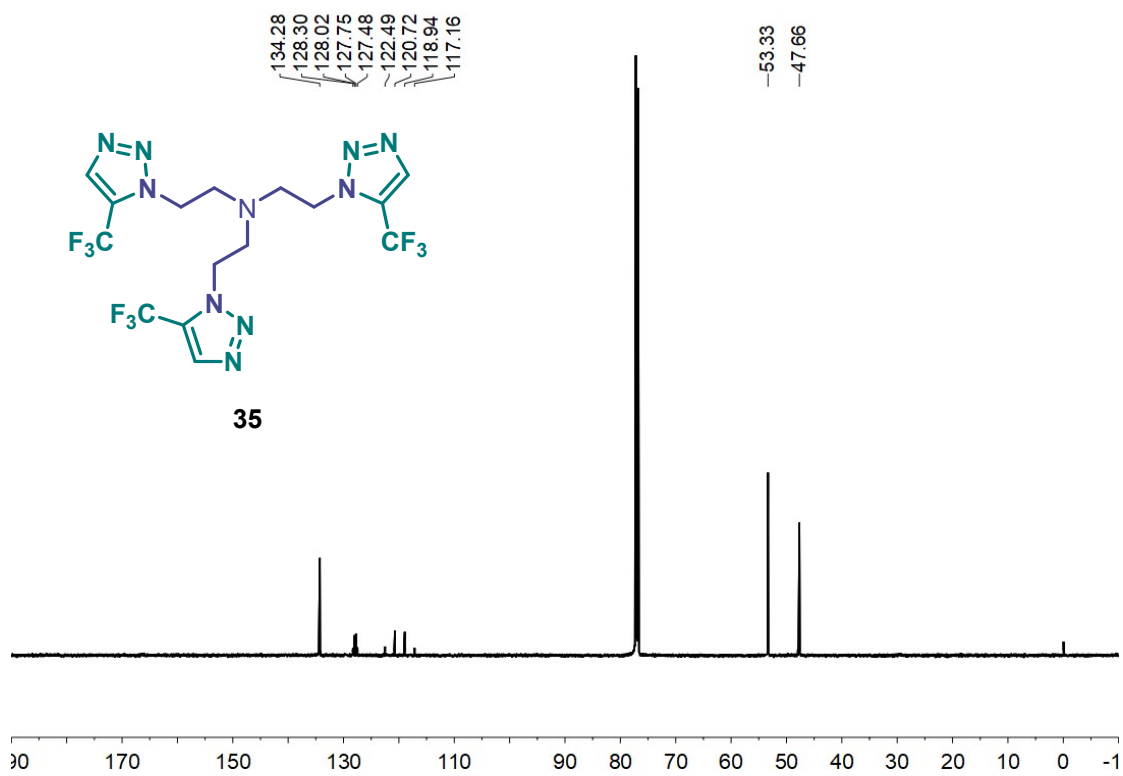

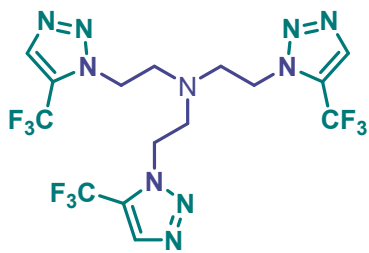

35

--59.048

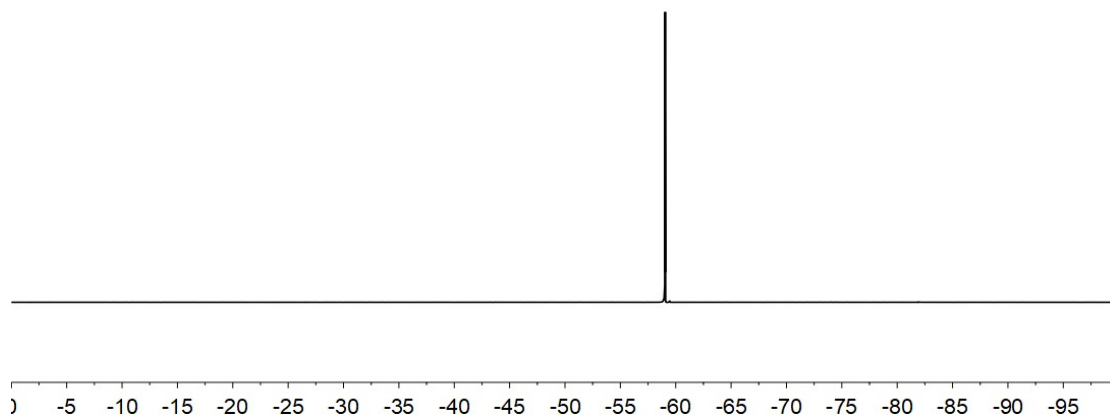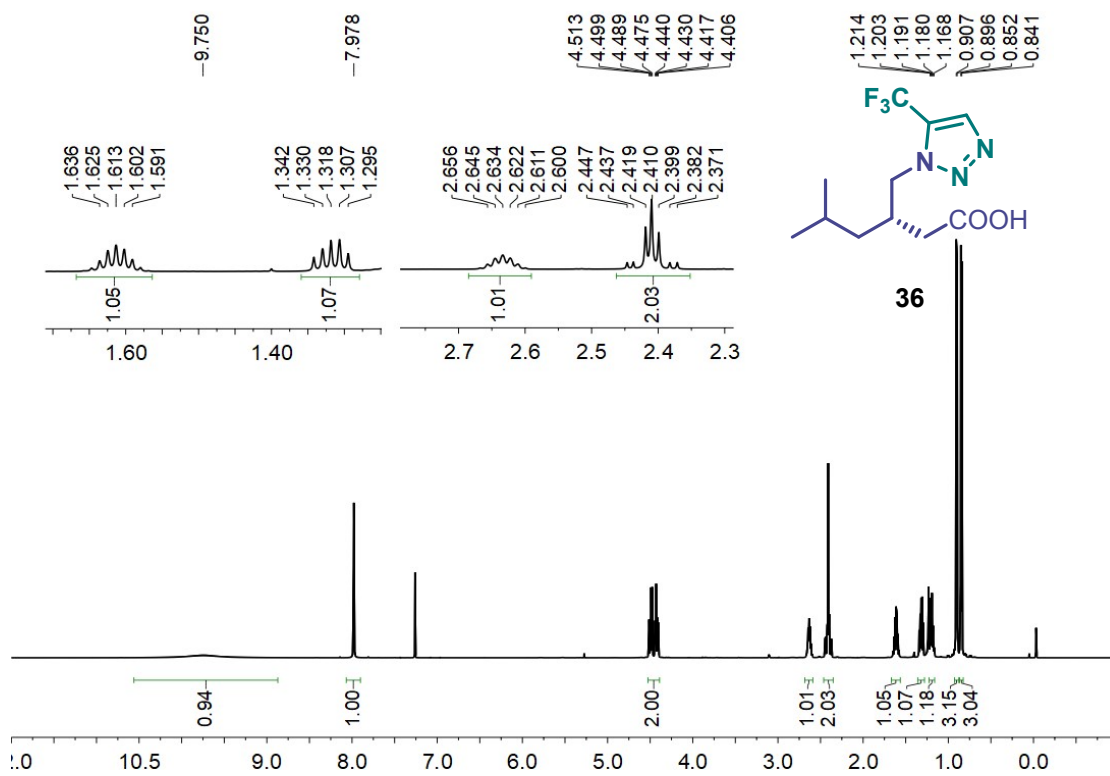

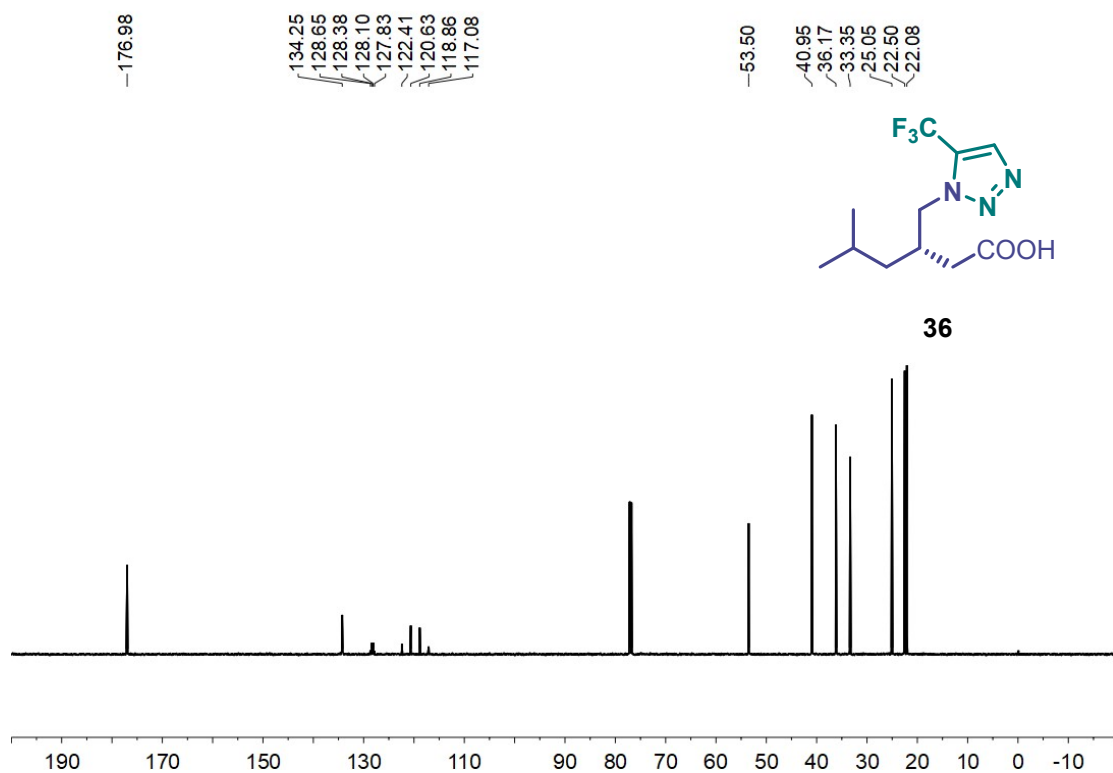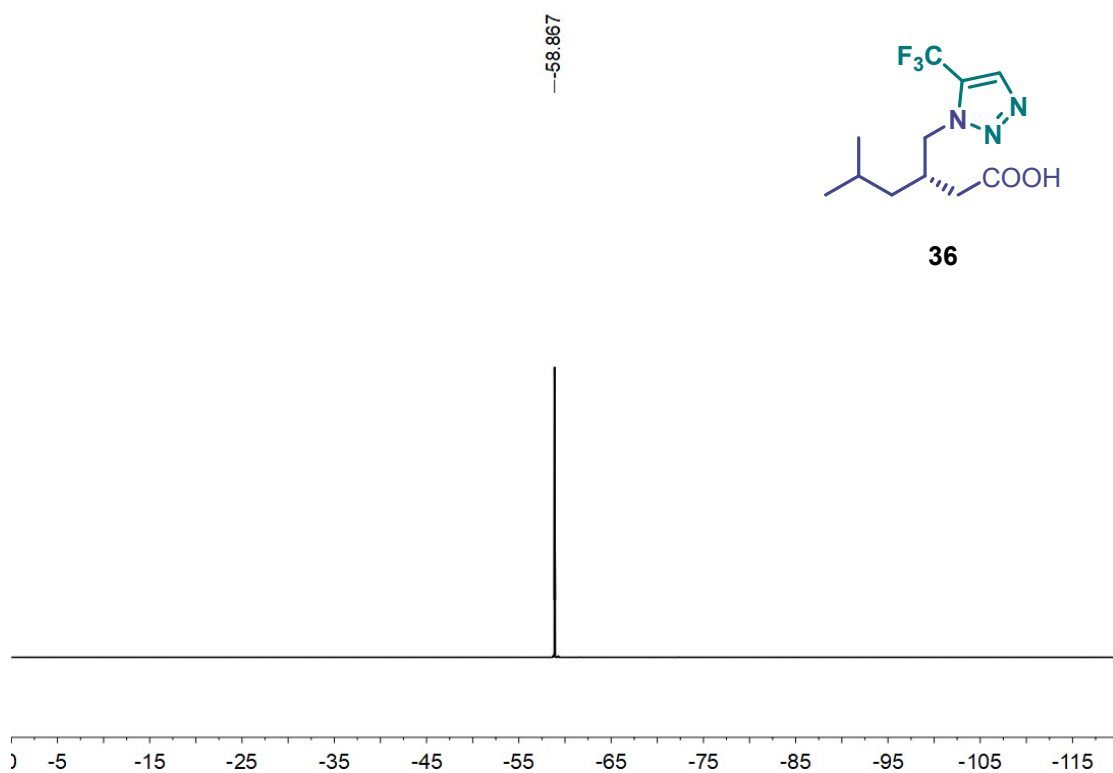

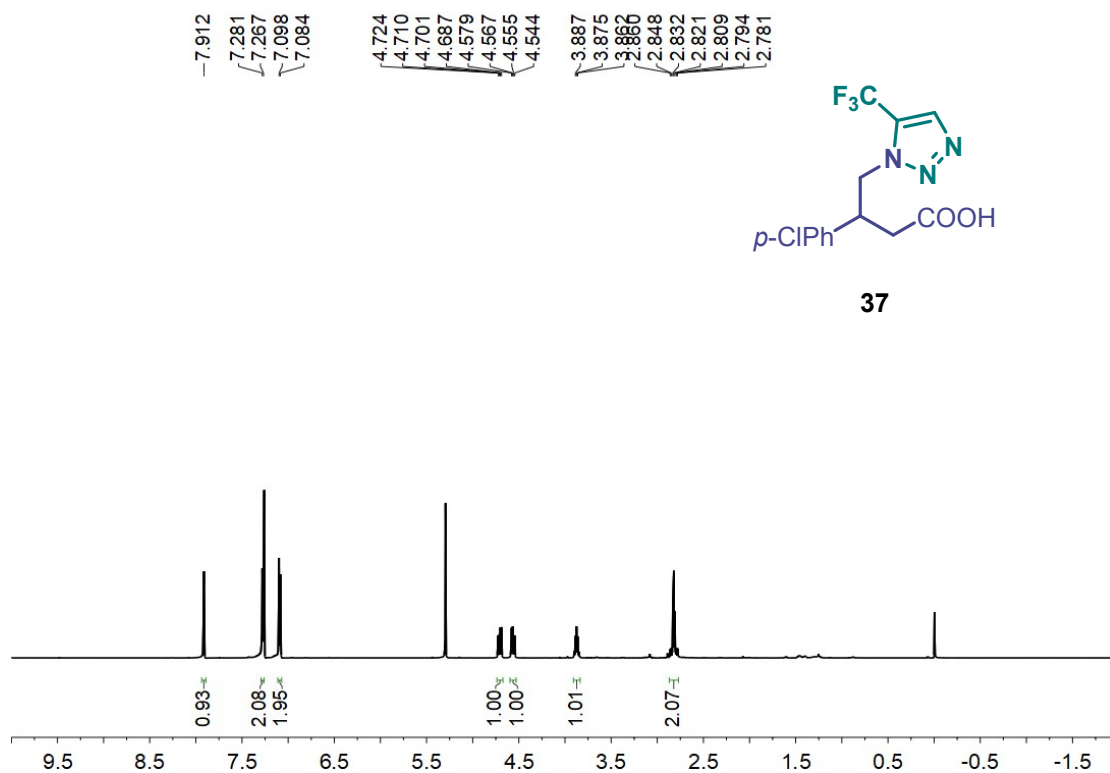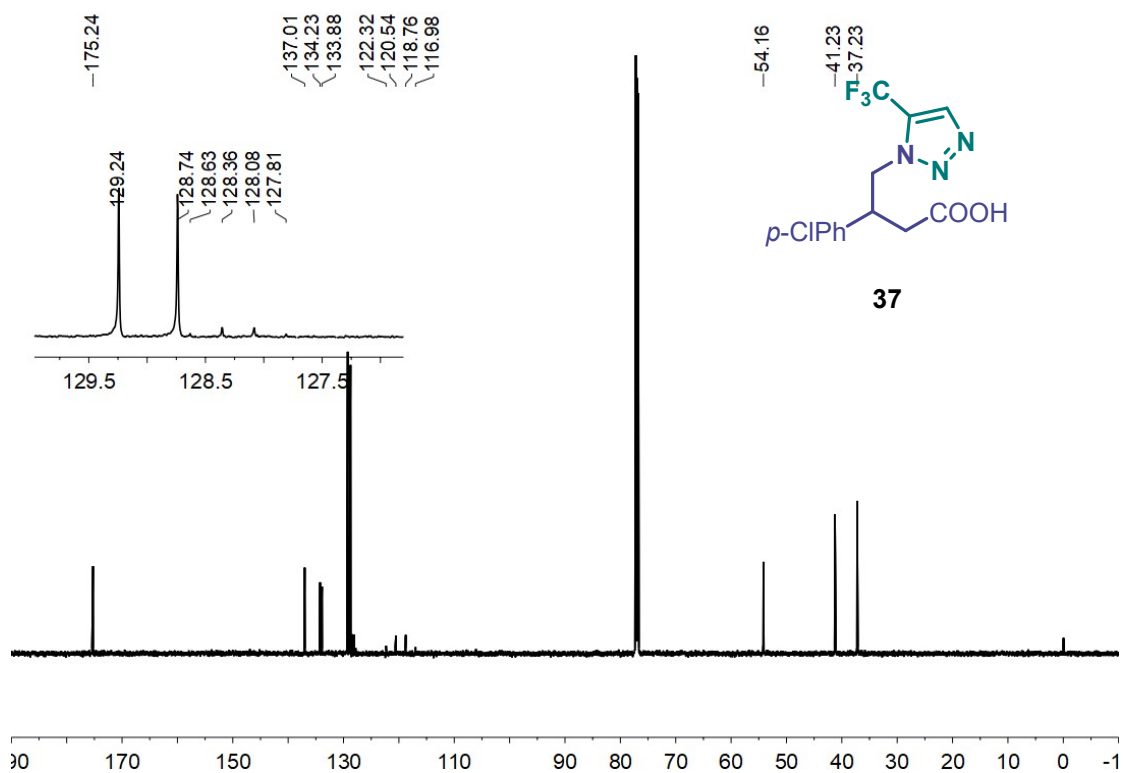



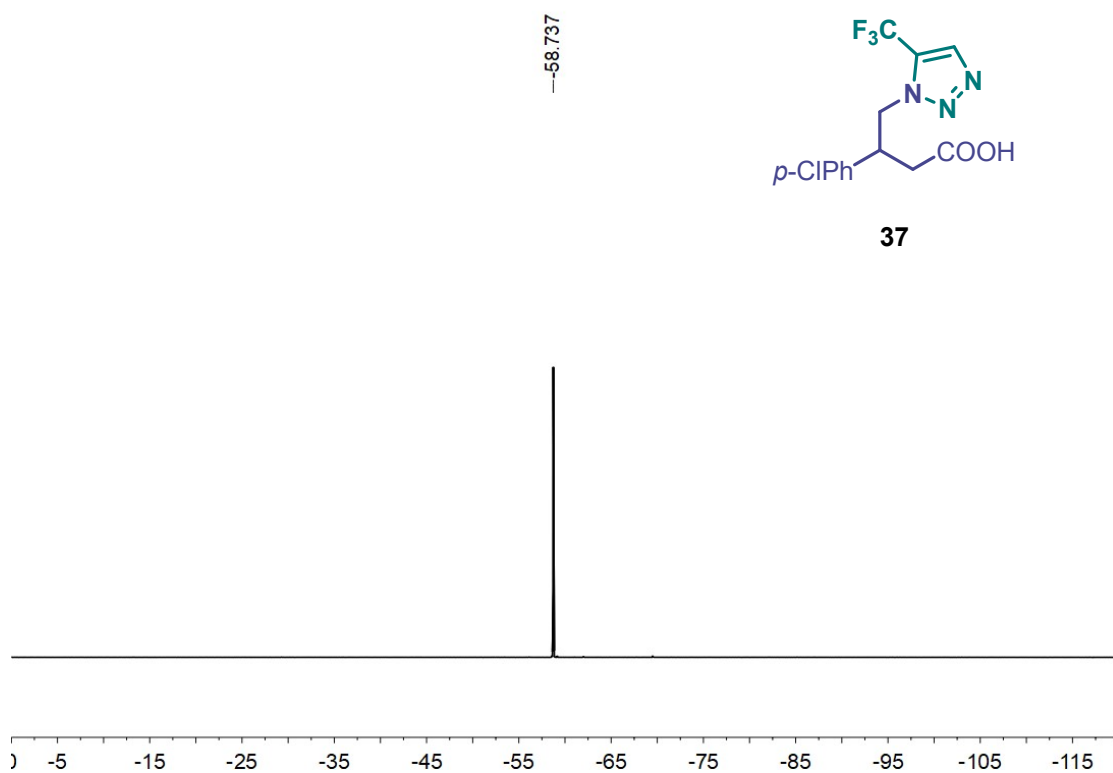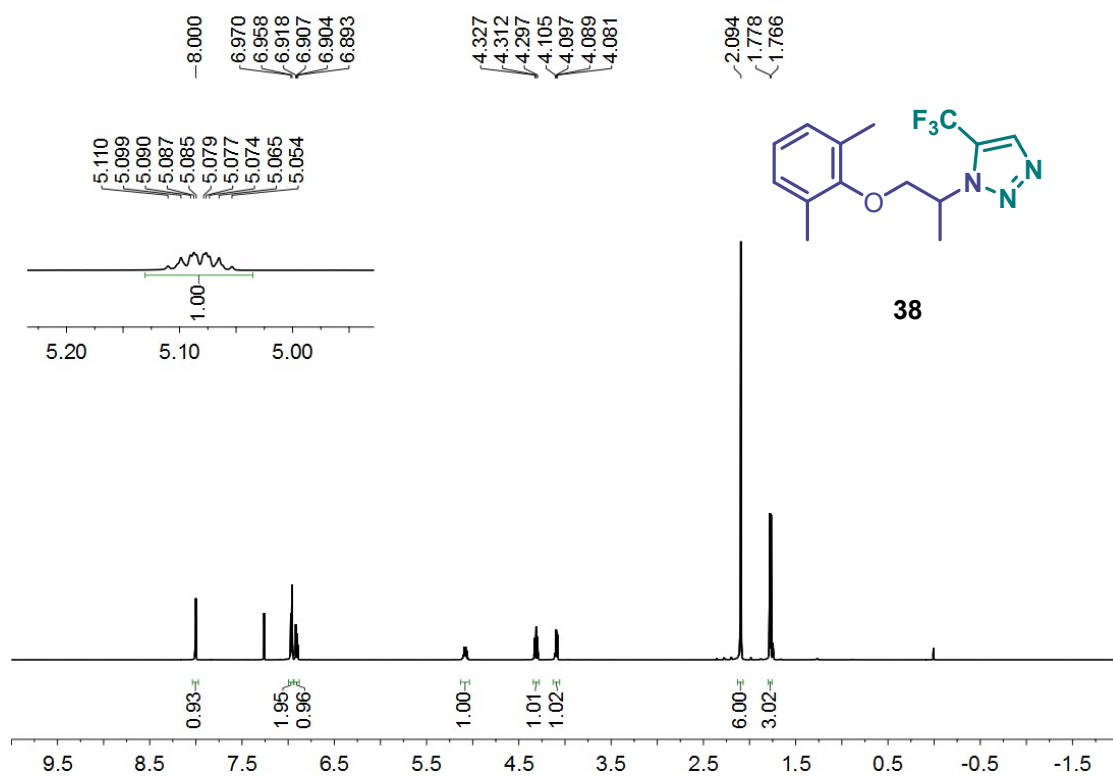

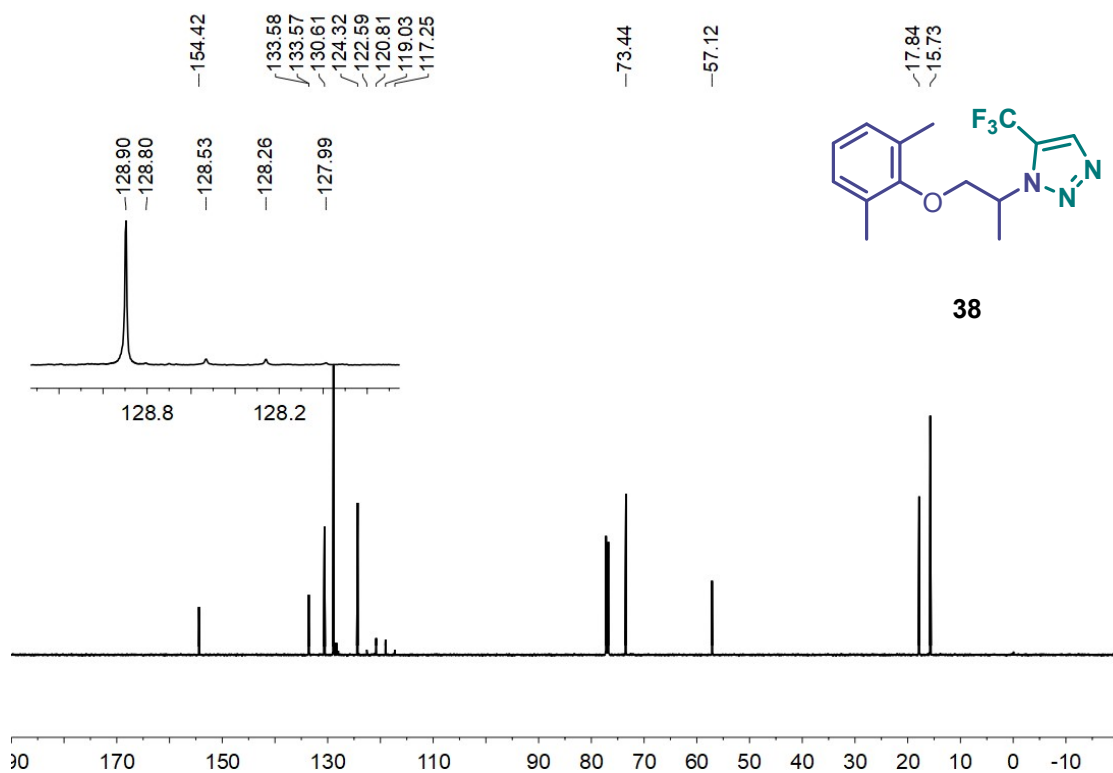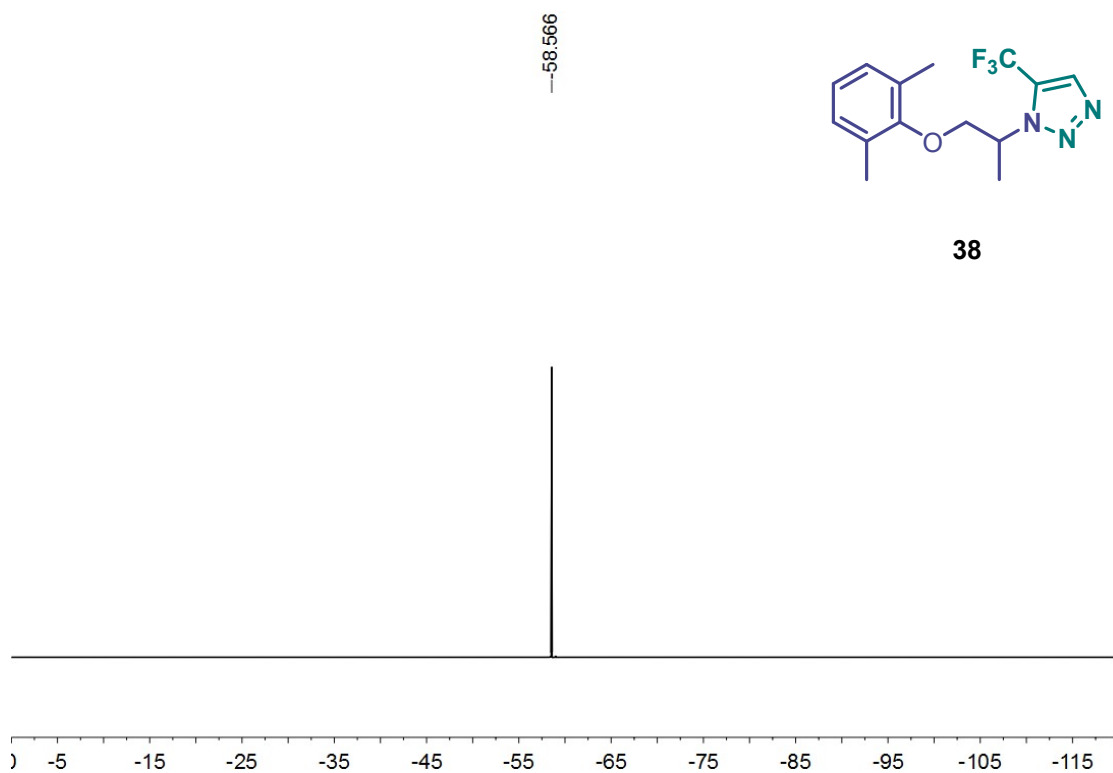

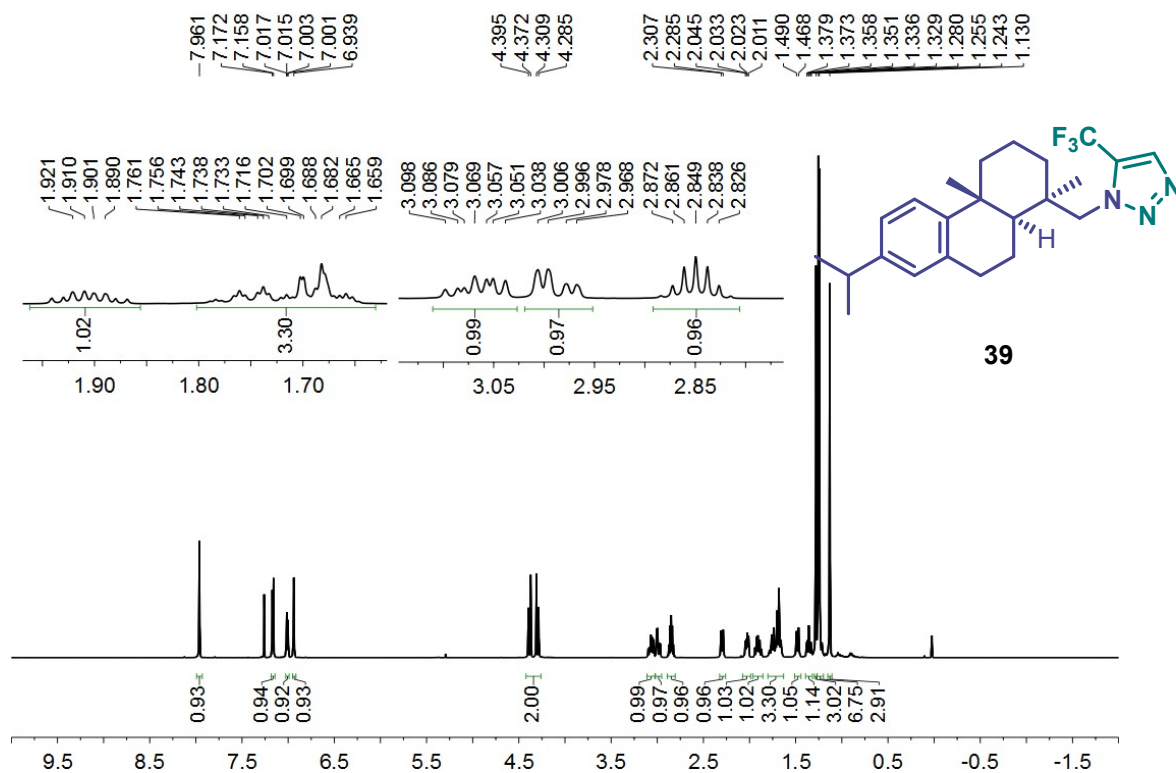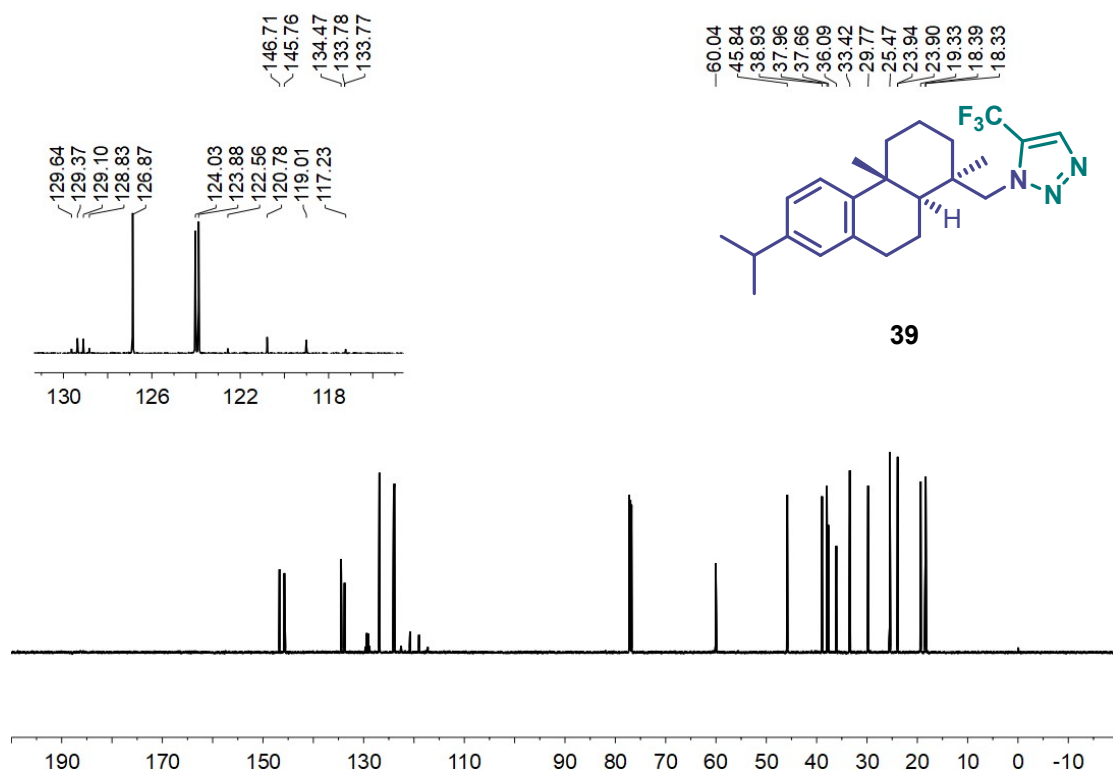

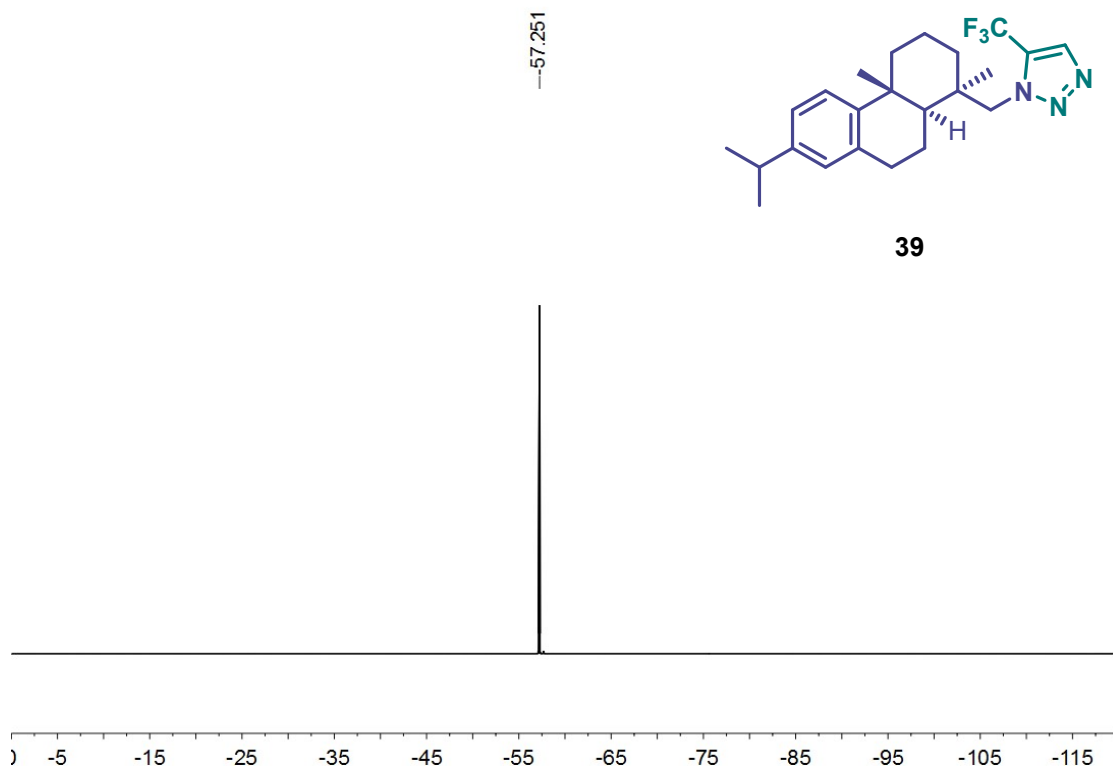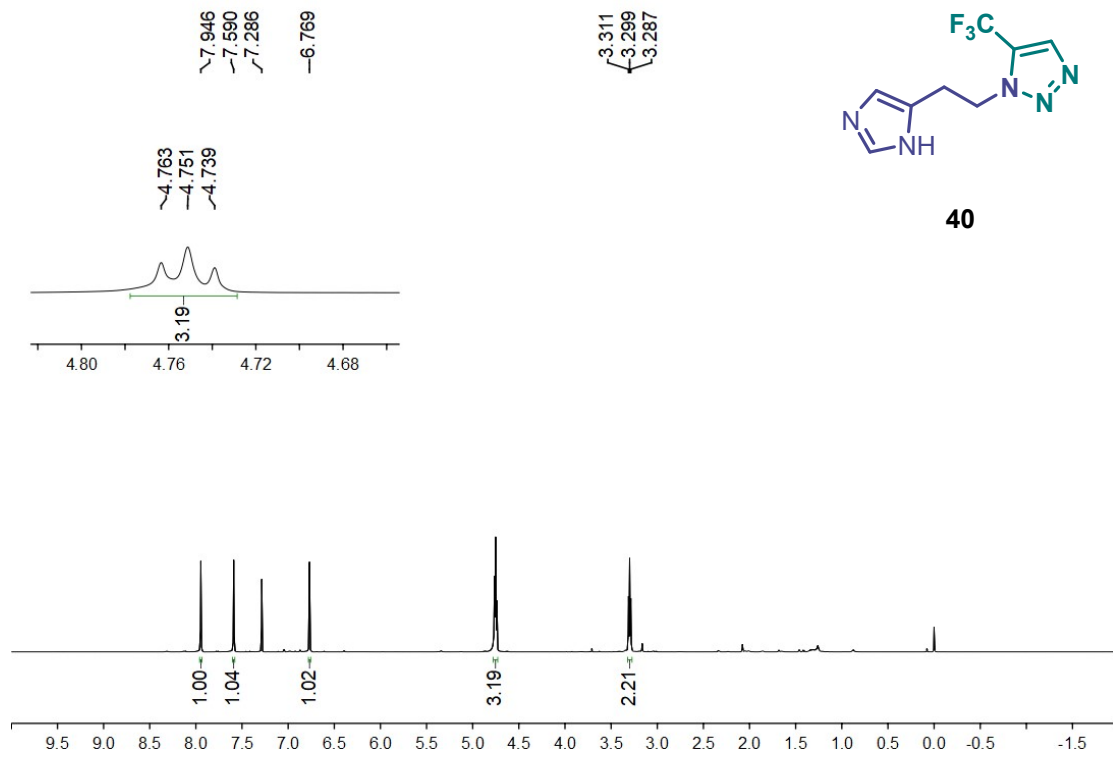

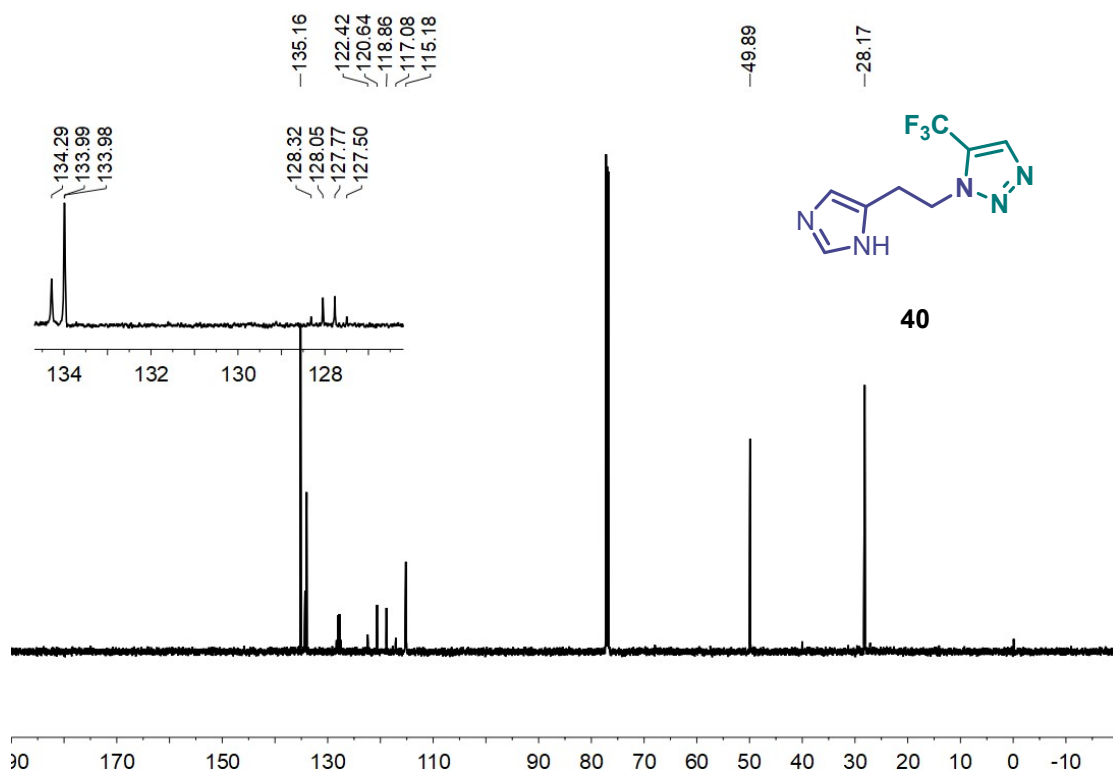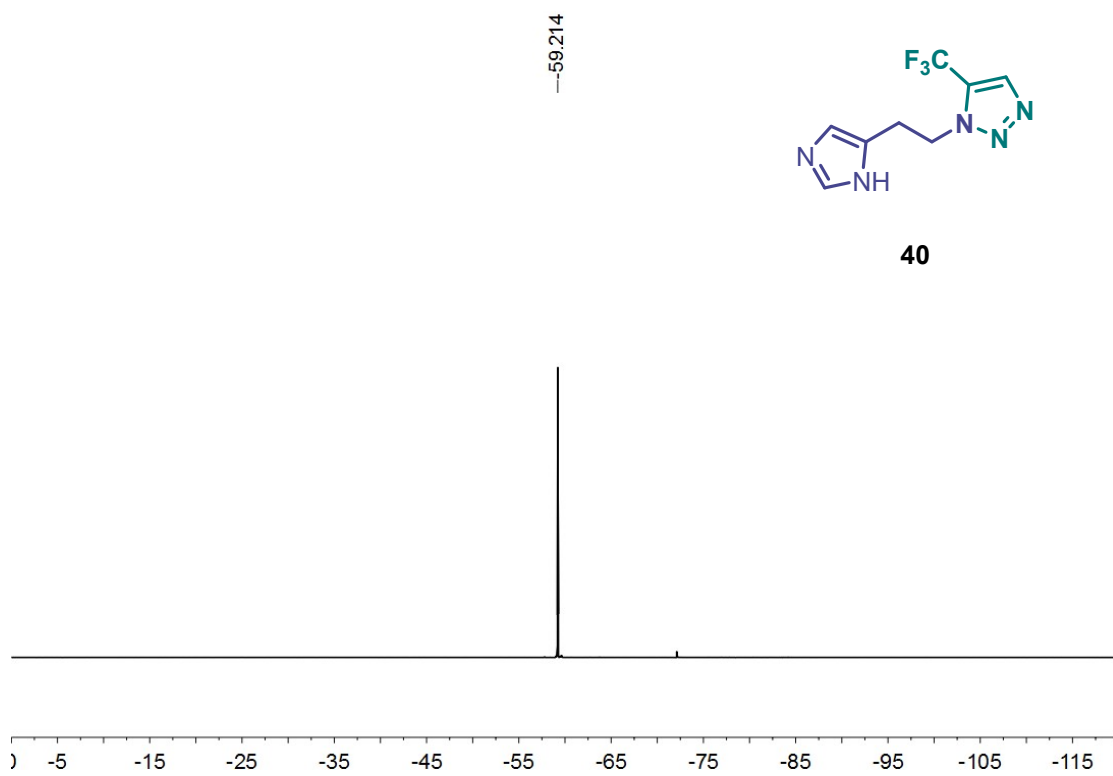

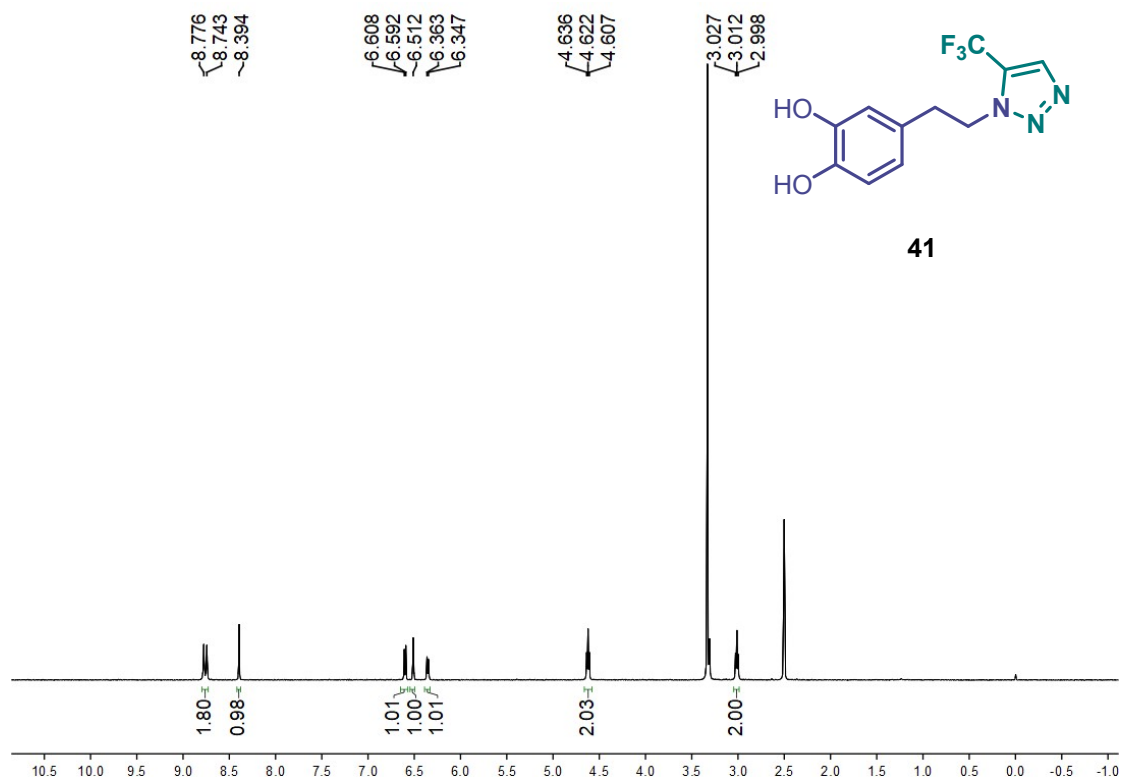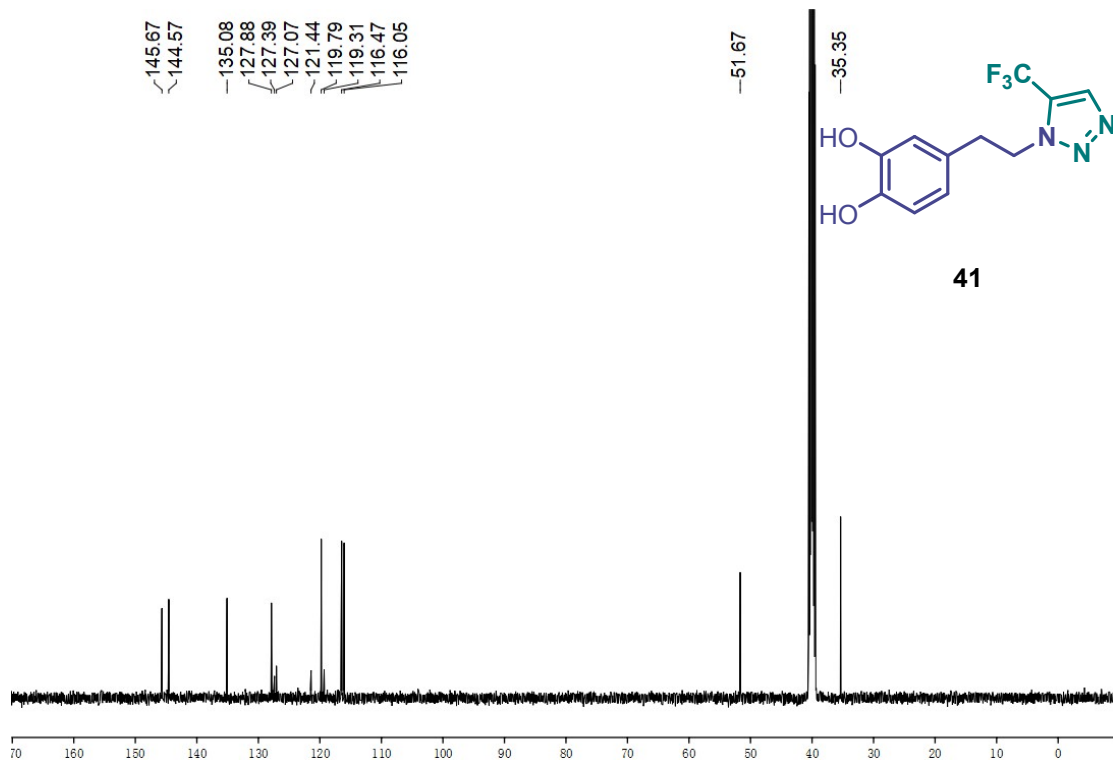

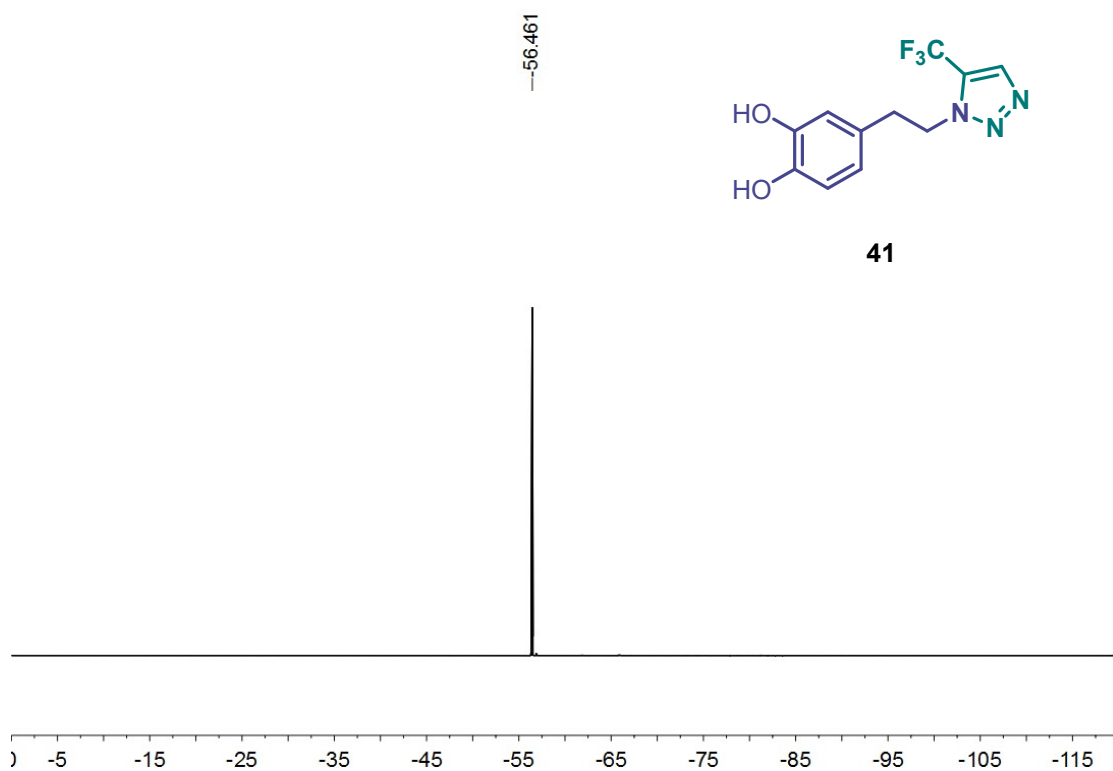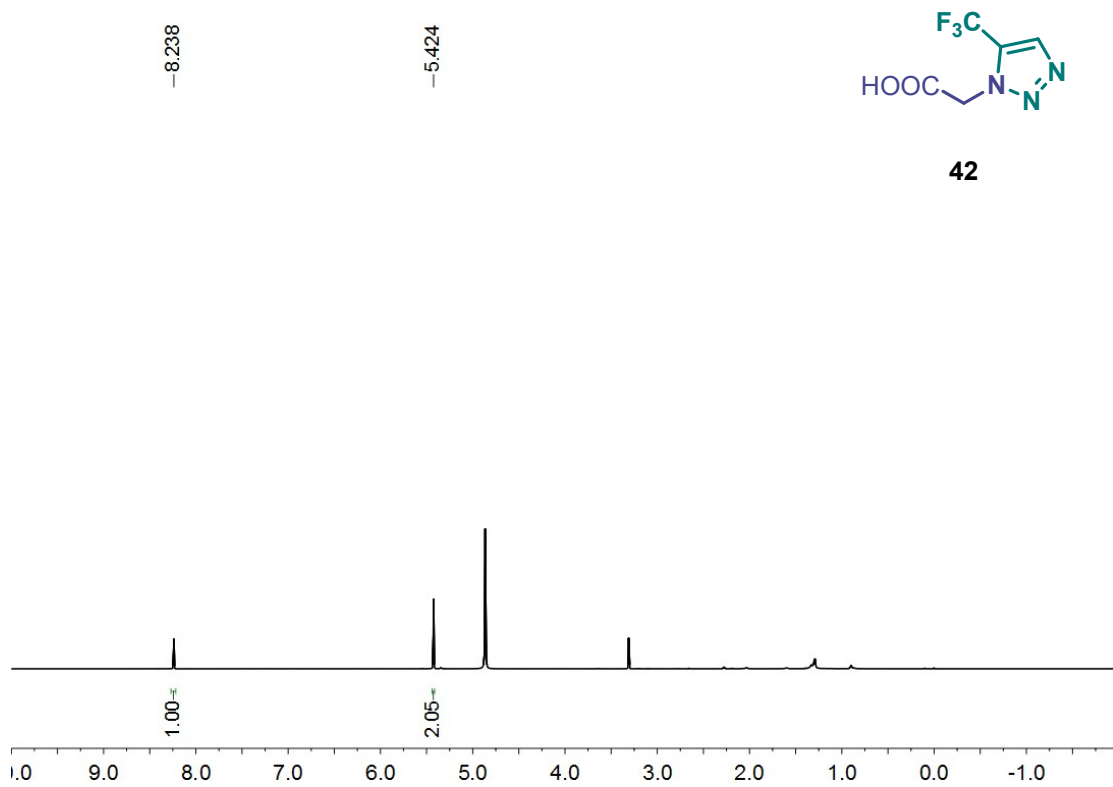

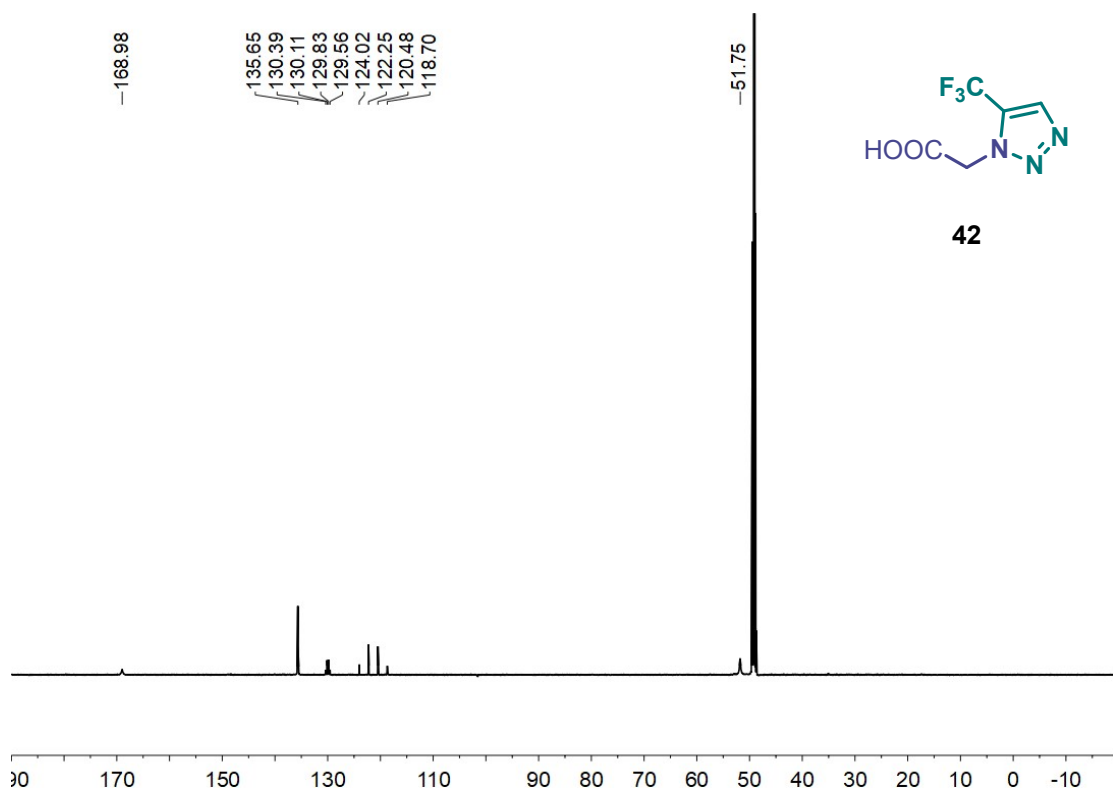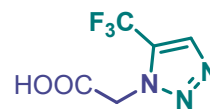

42

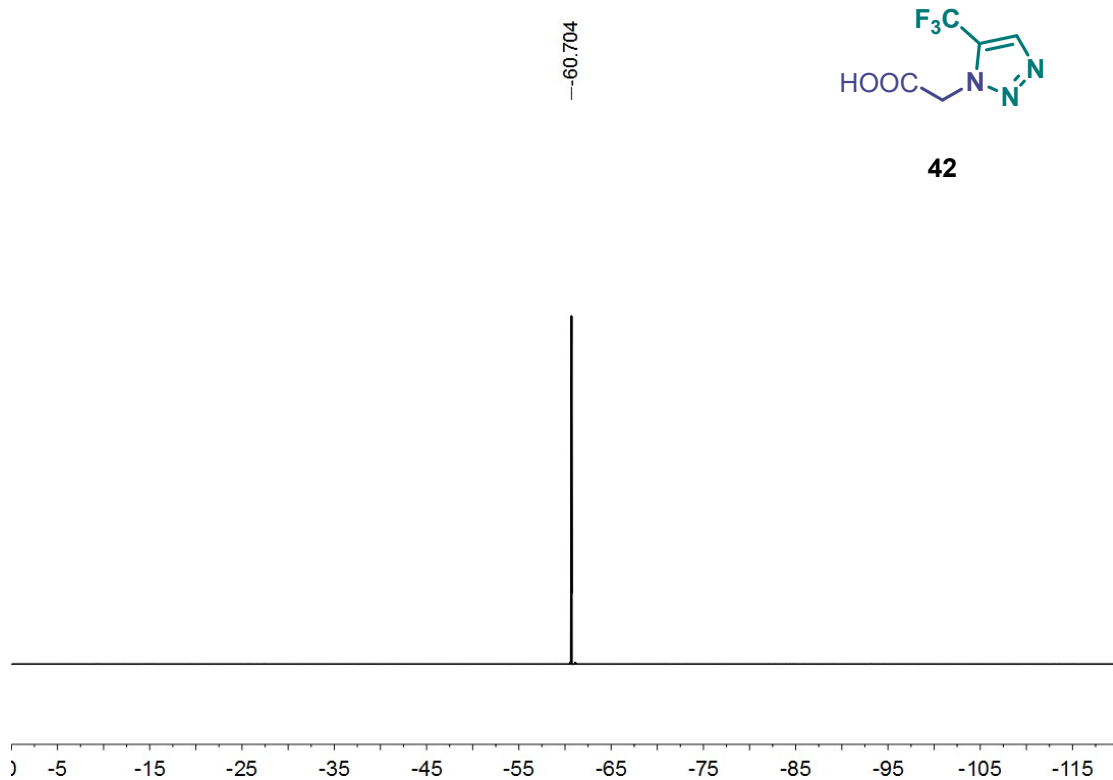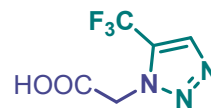

42



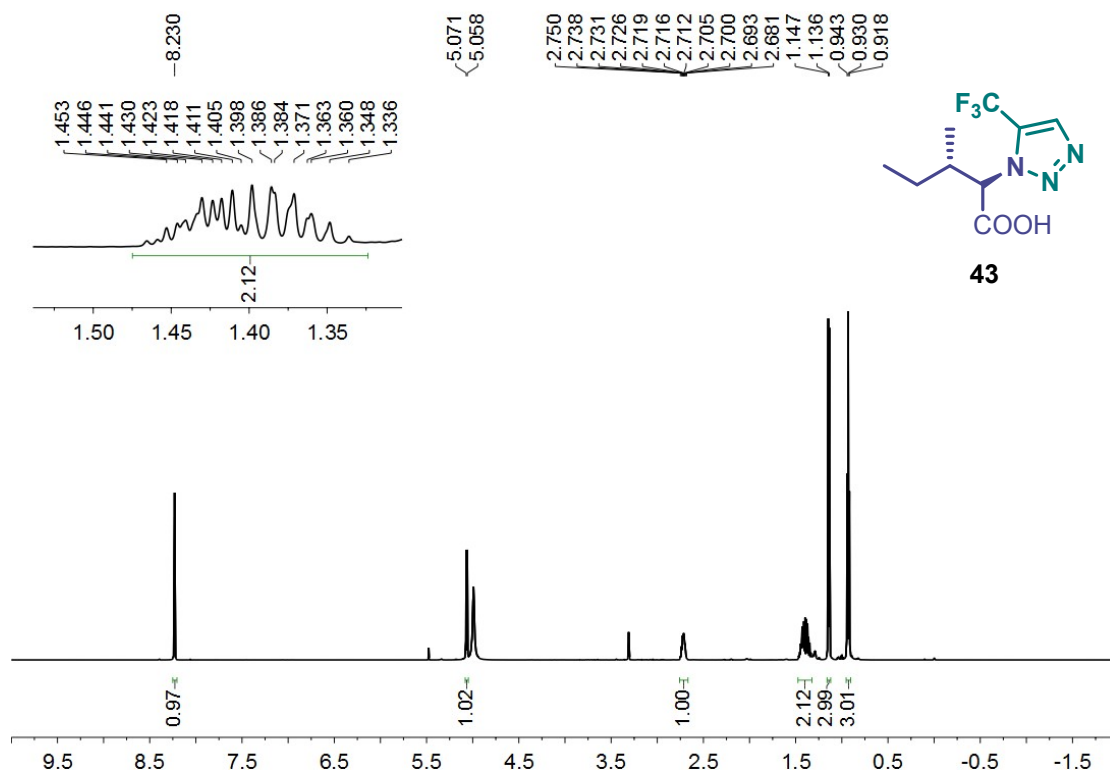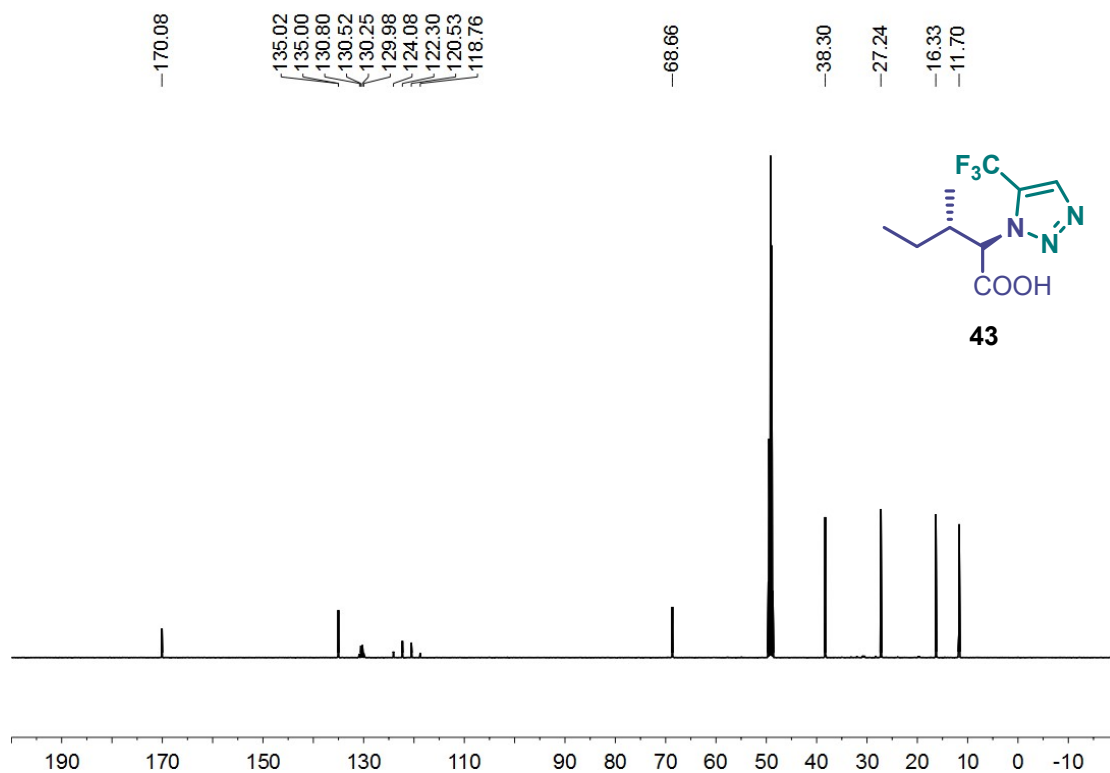

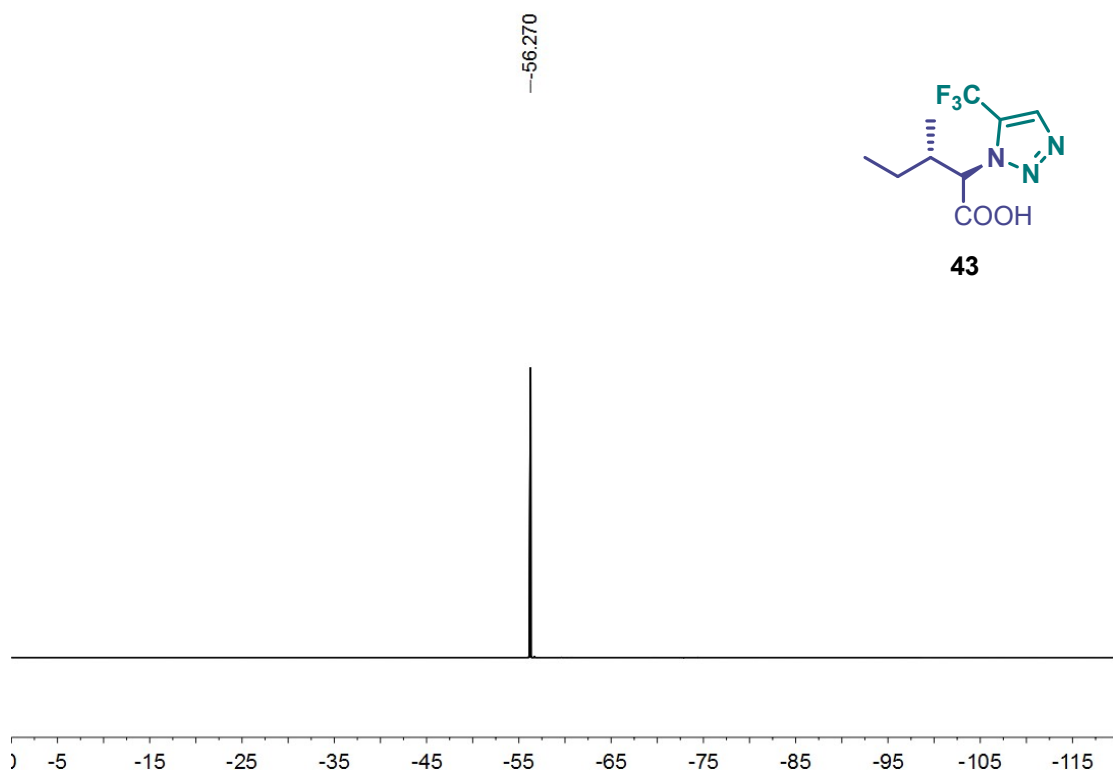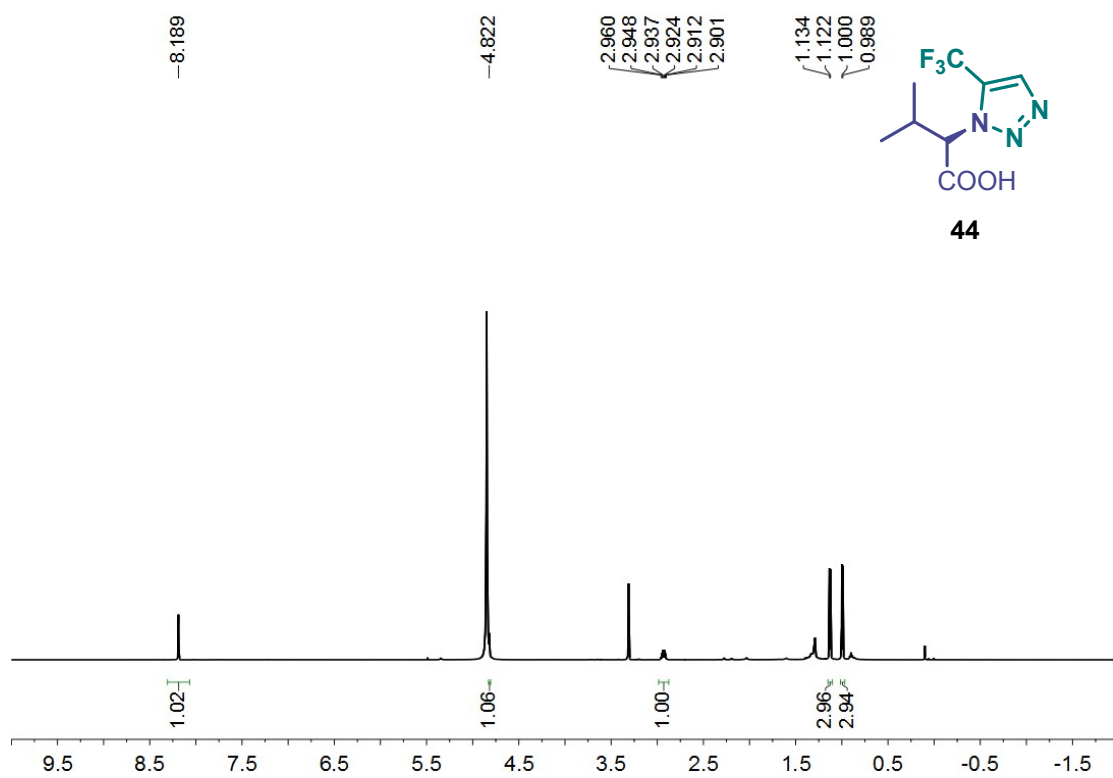

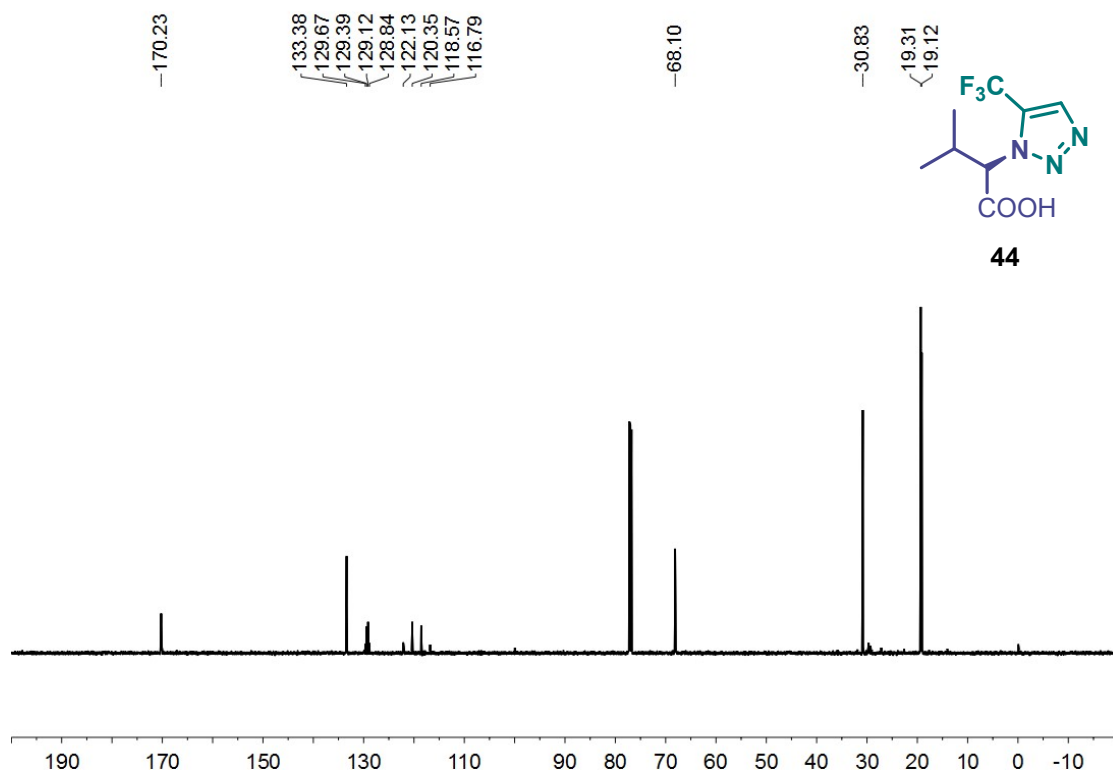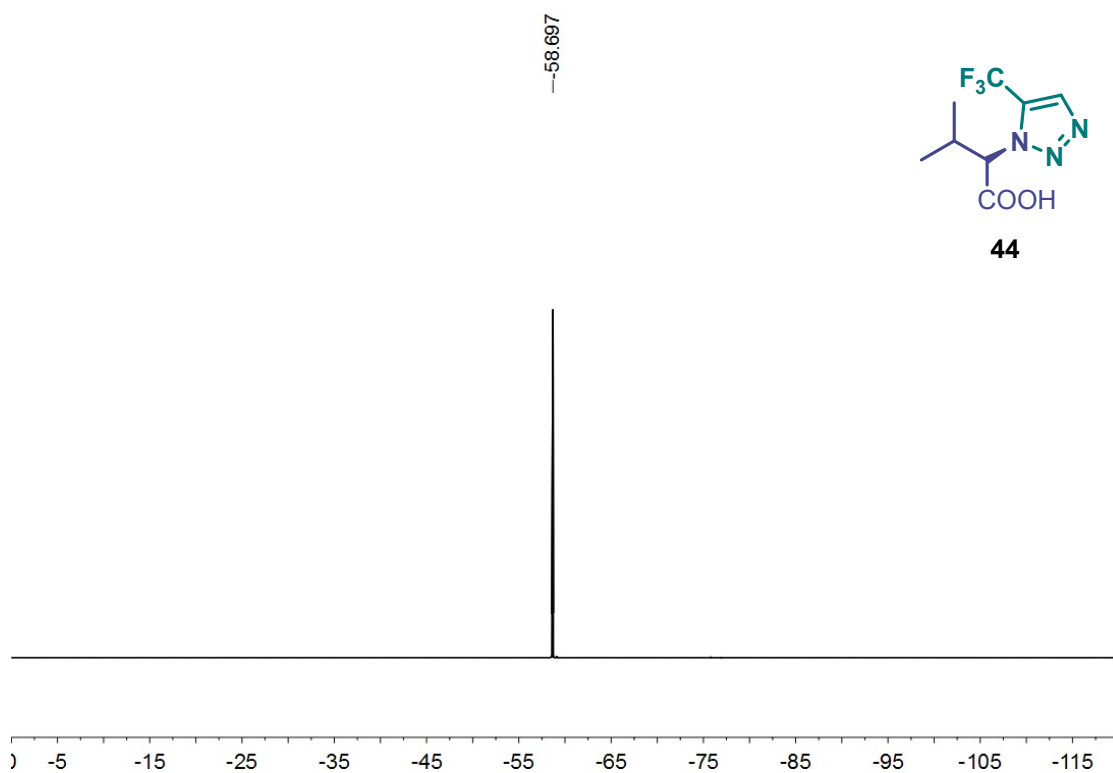

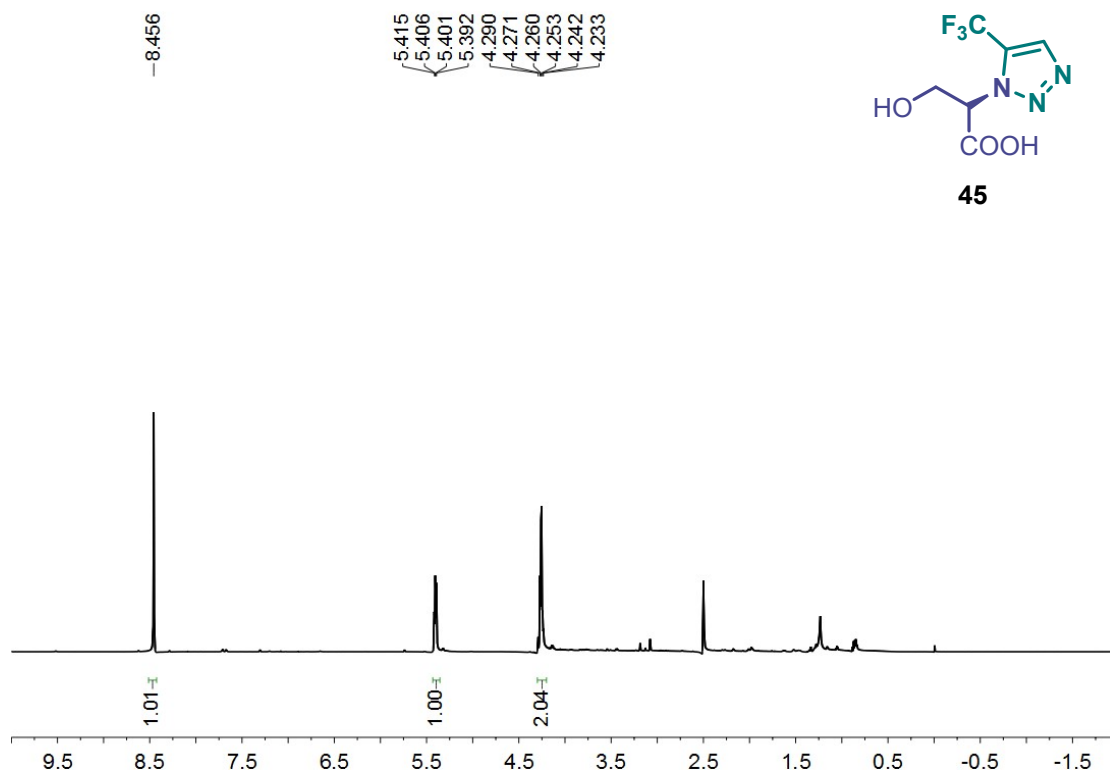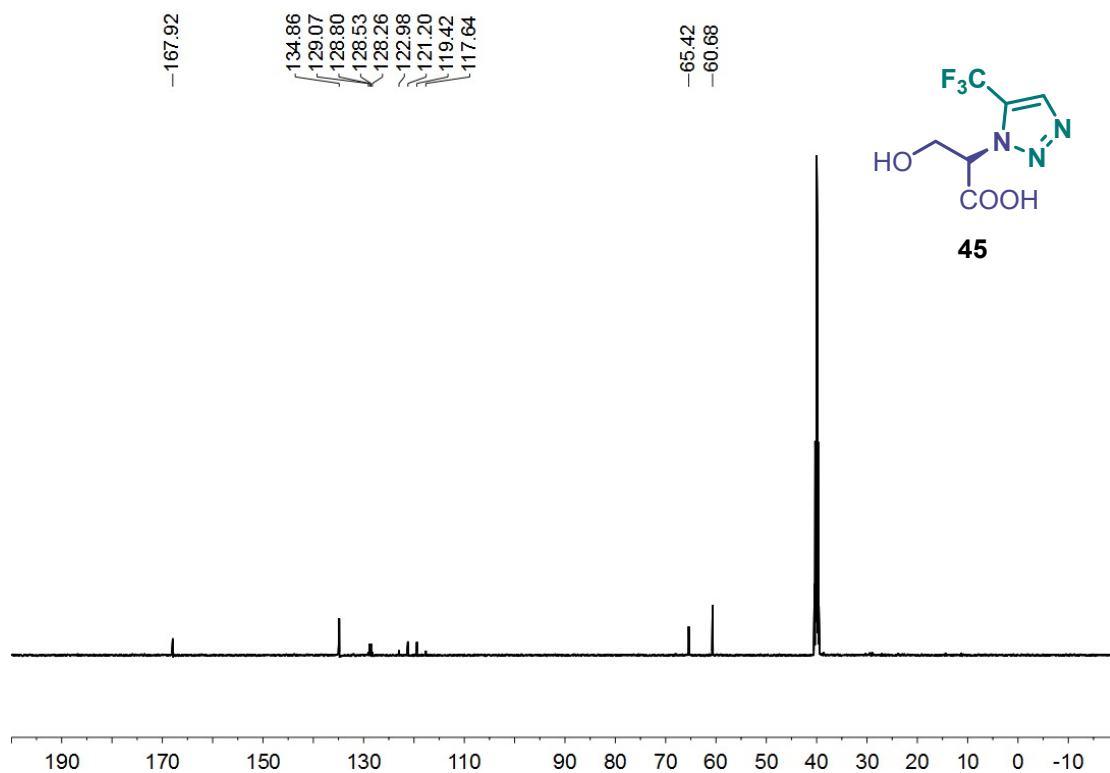

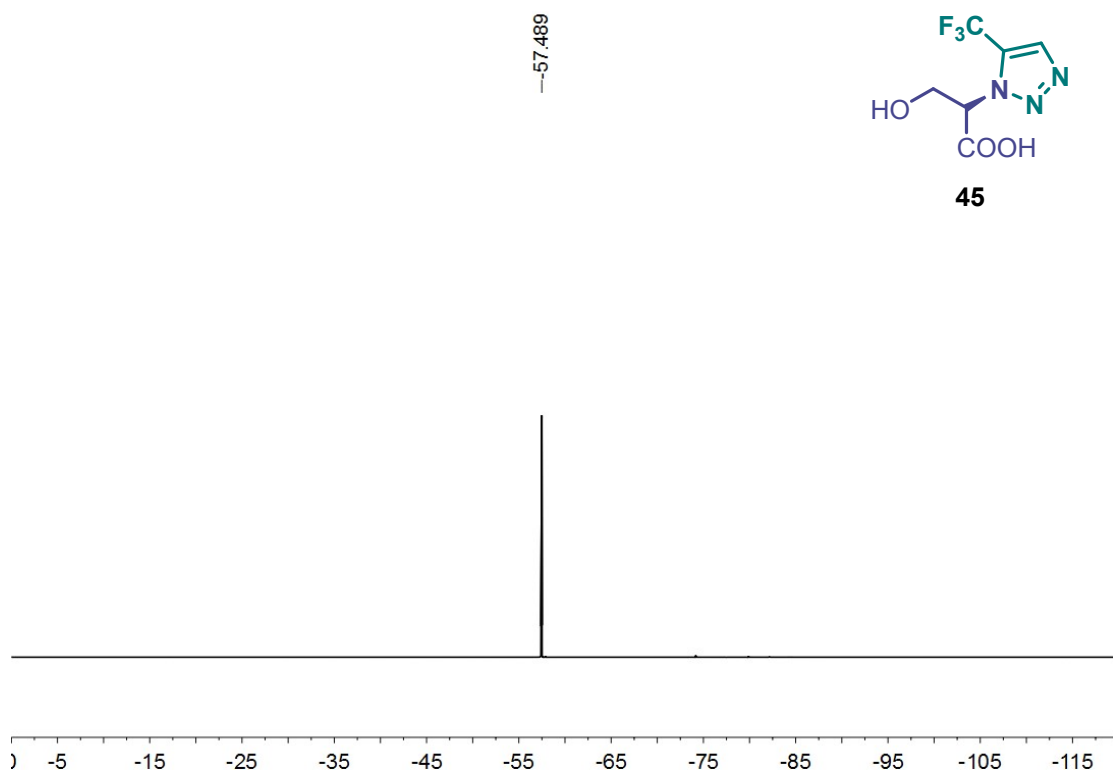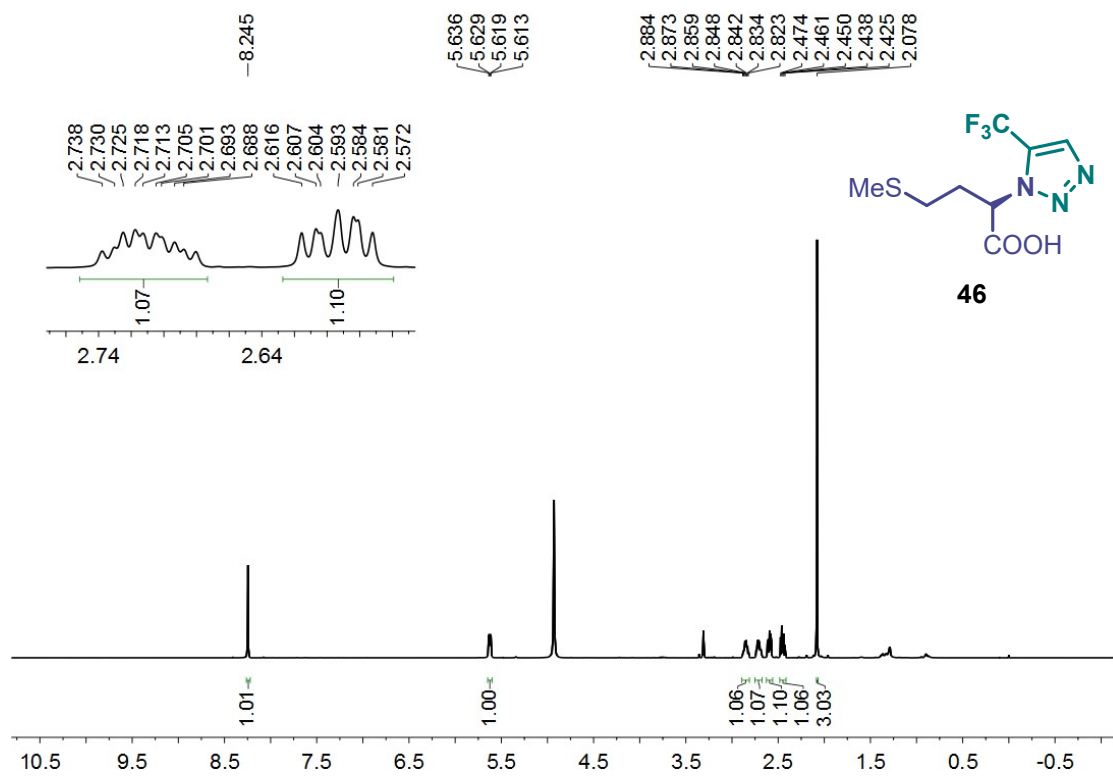

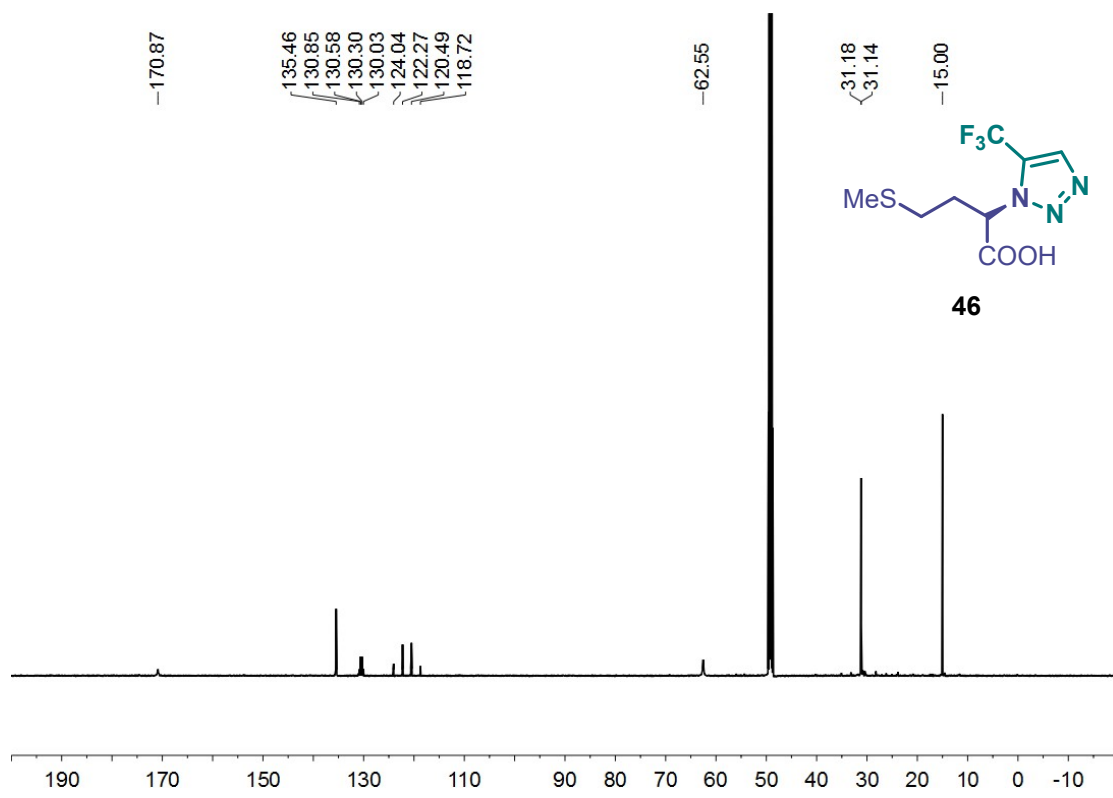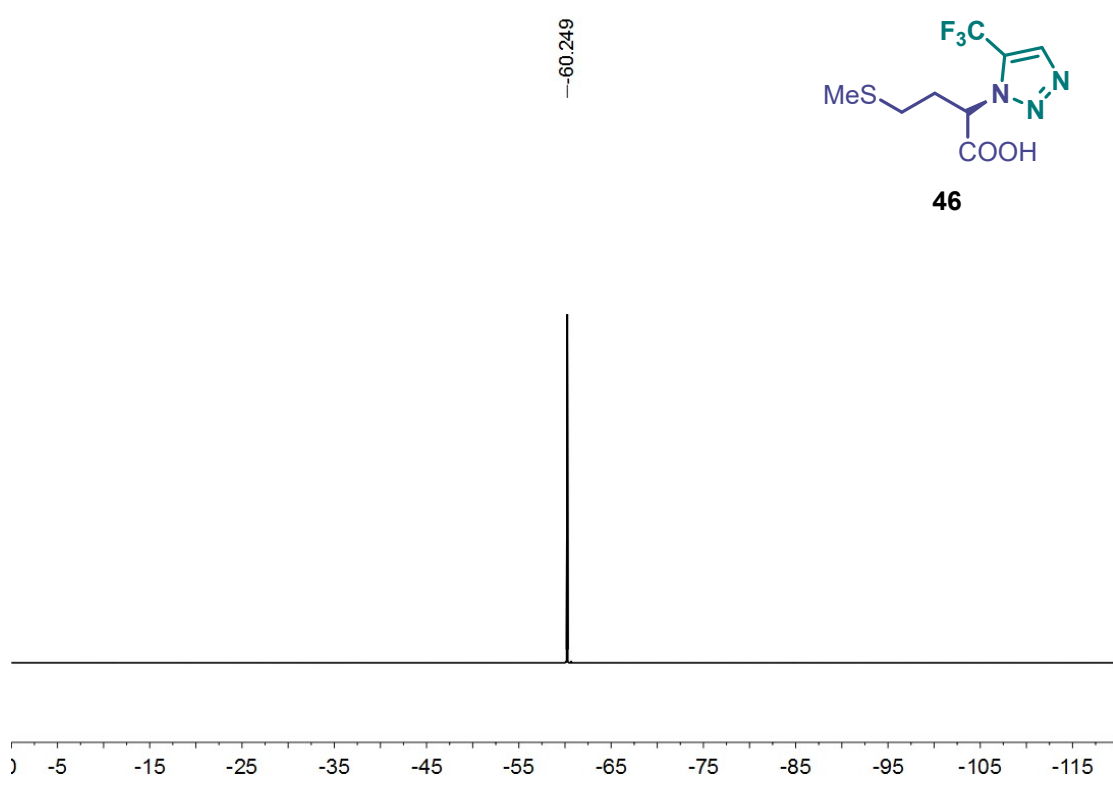

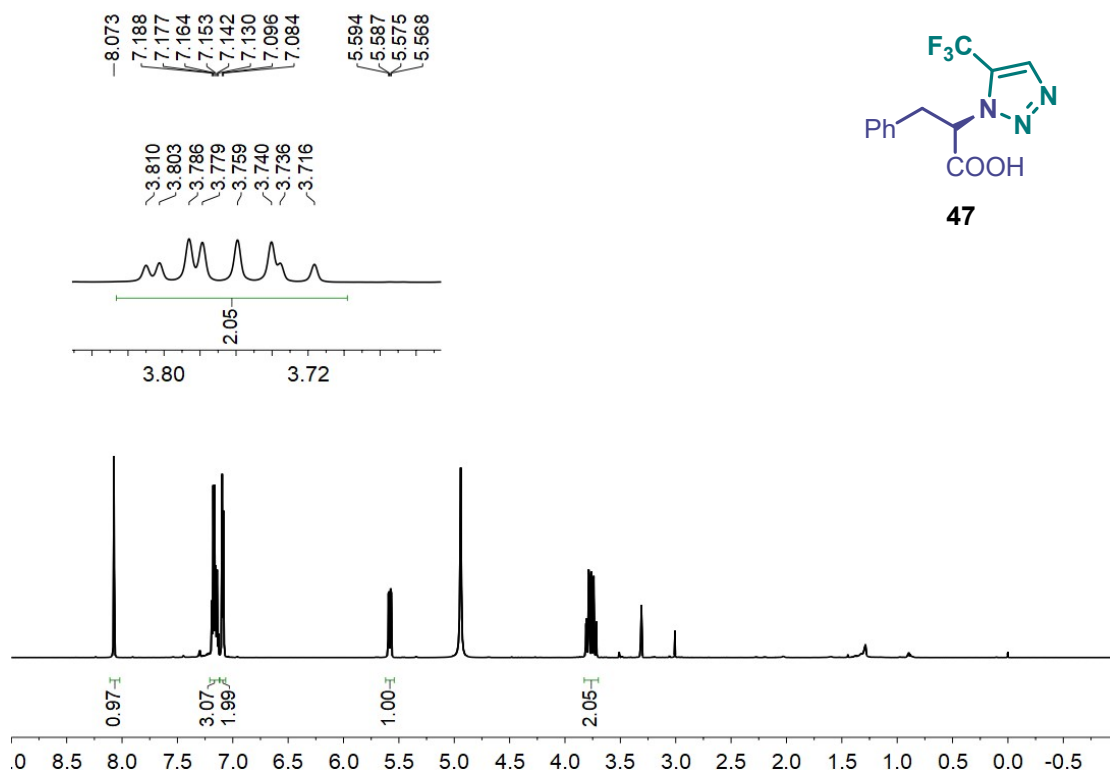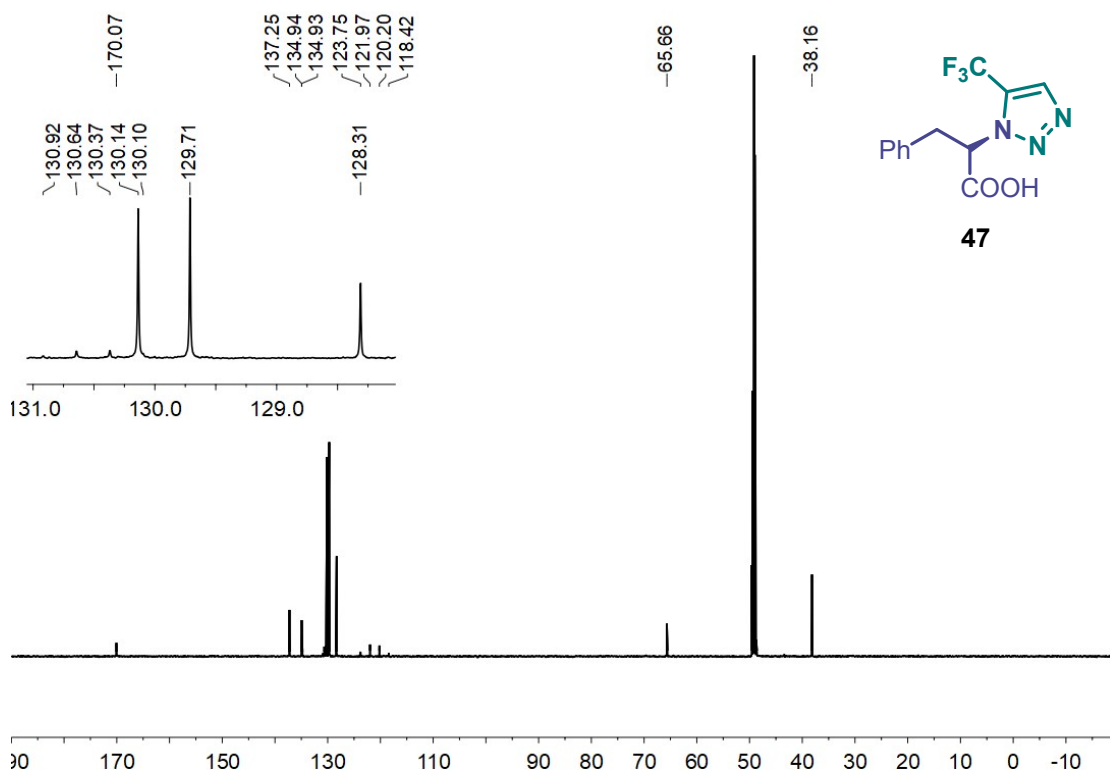

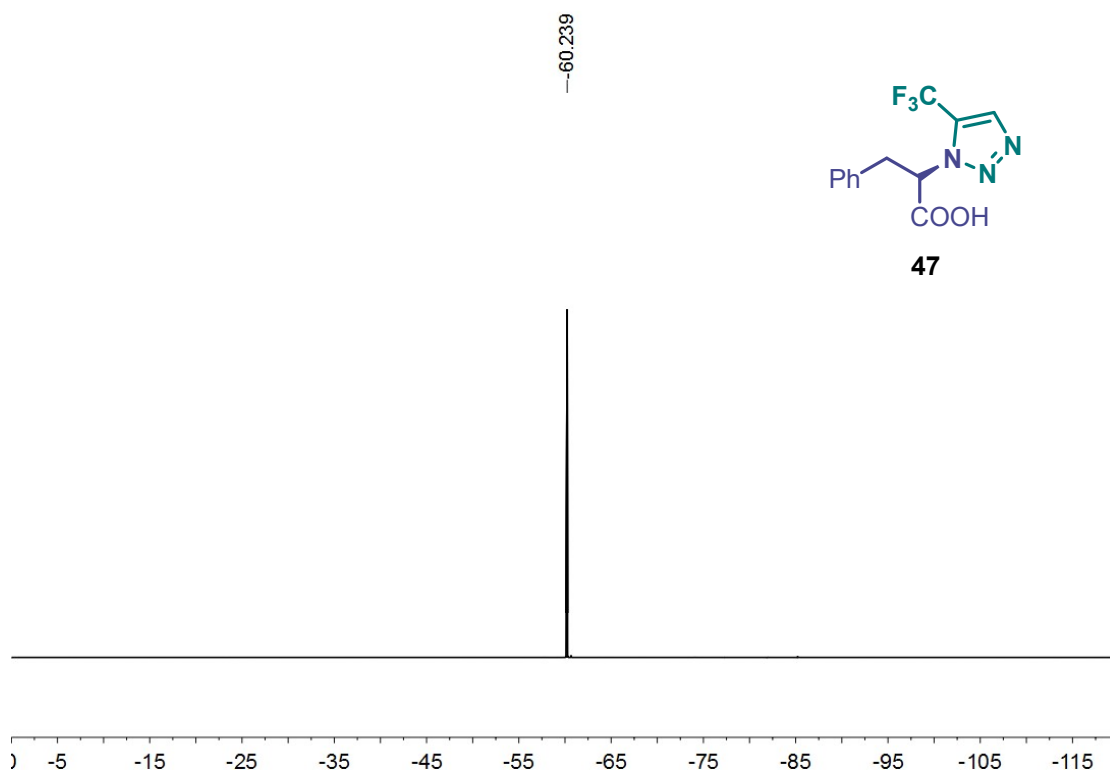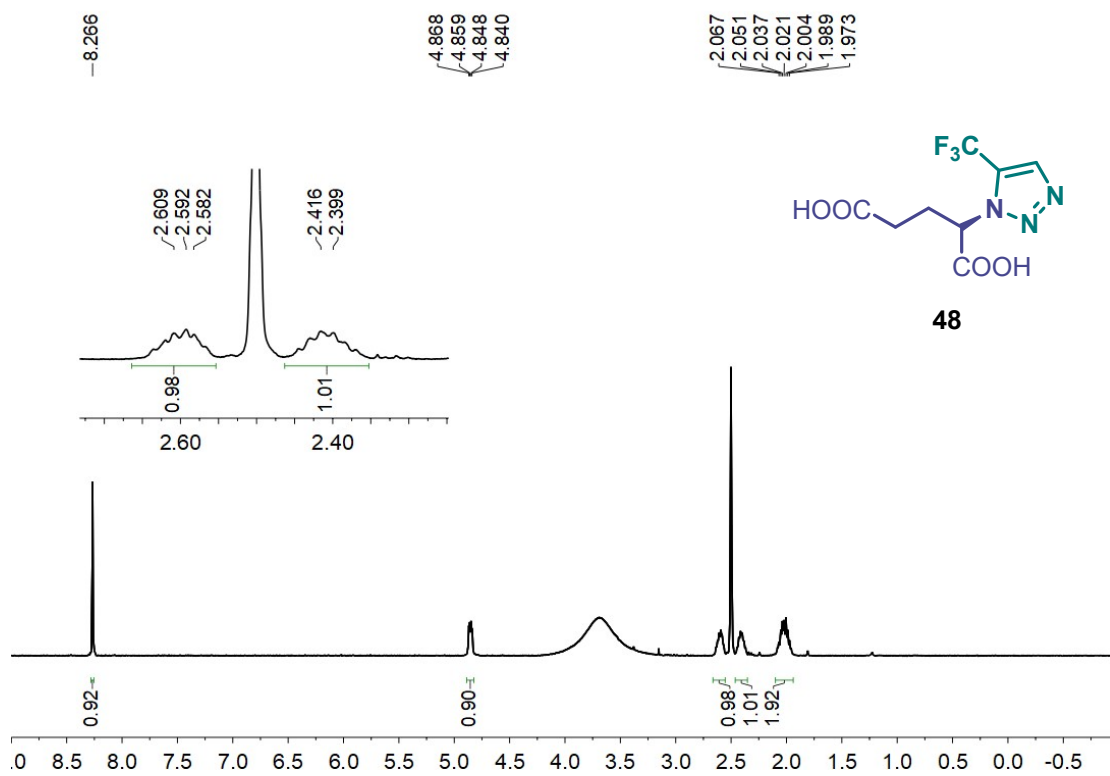



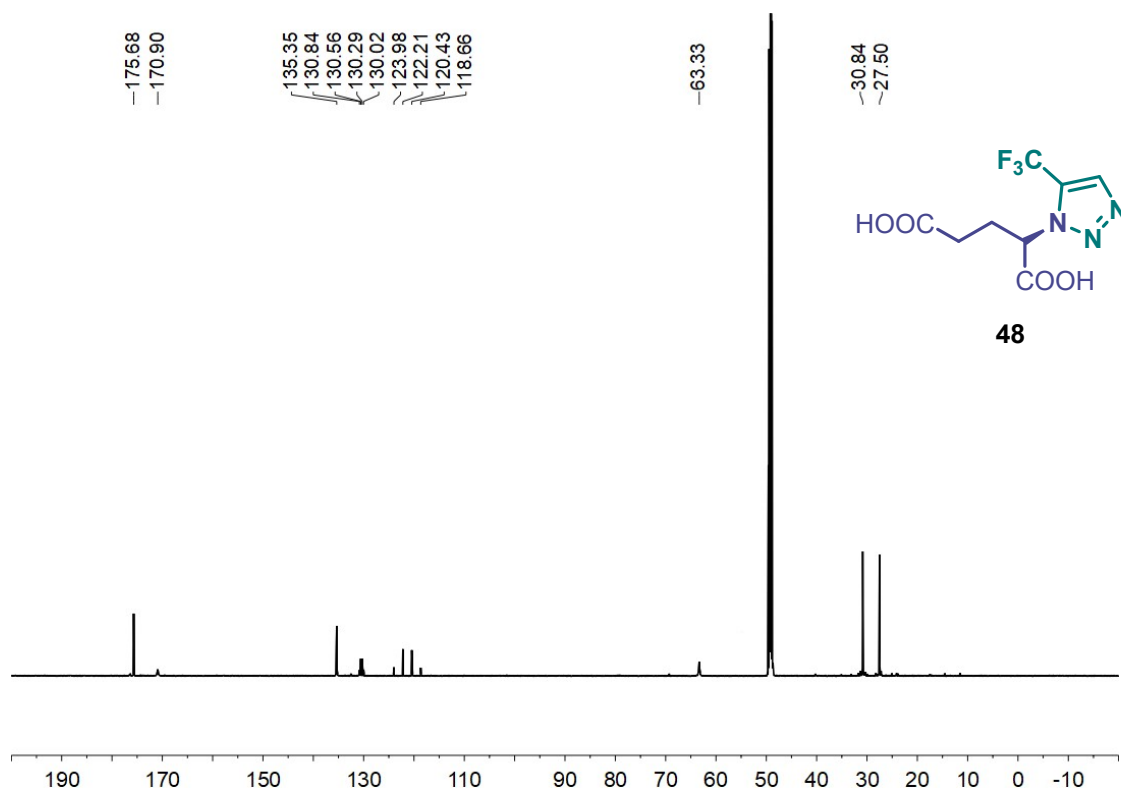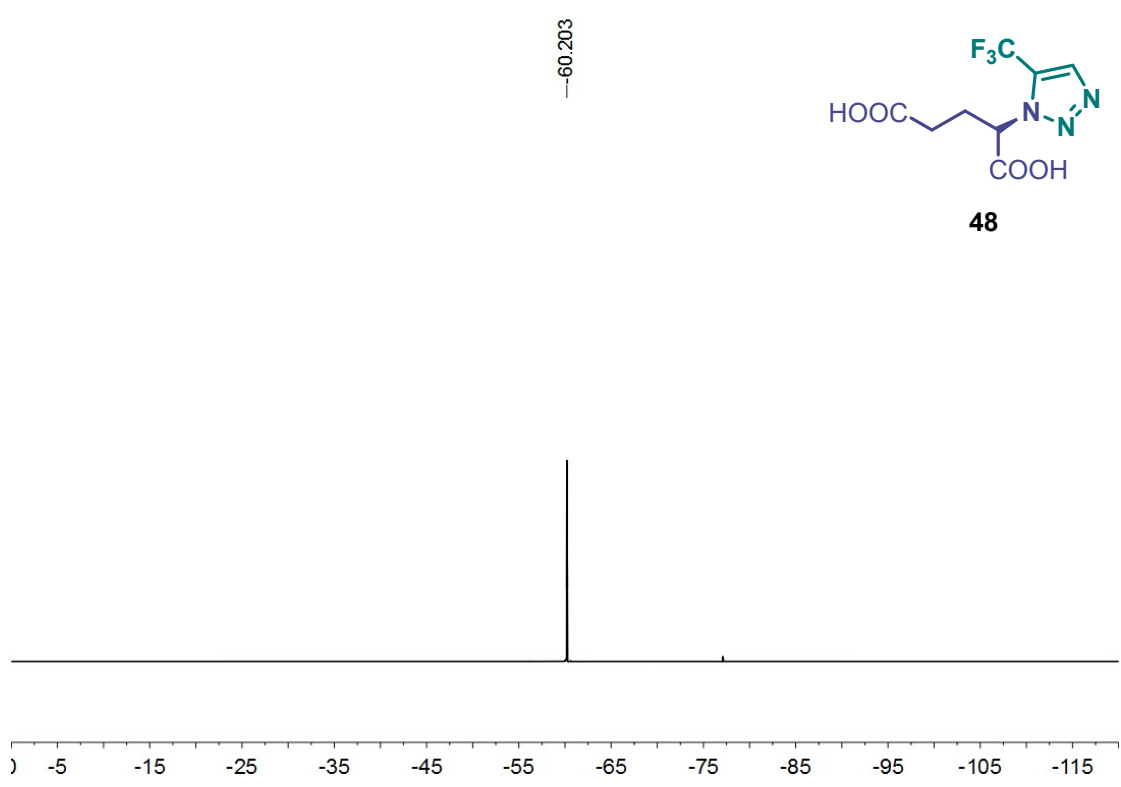

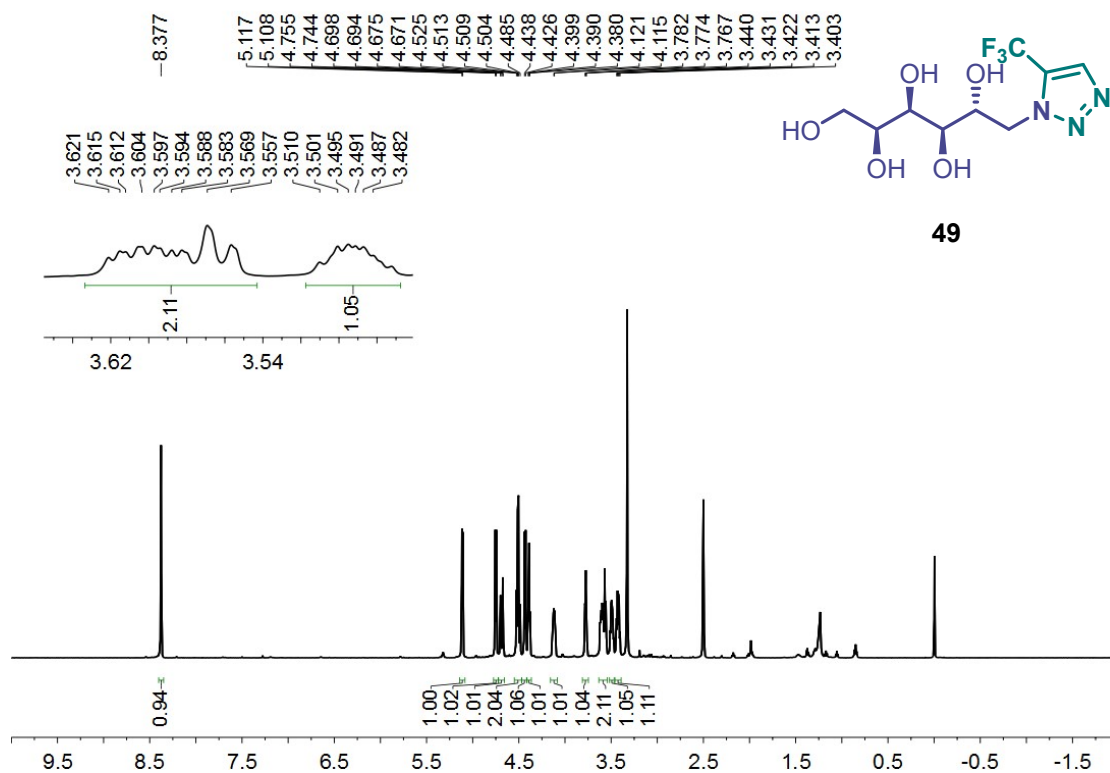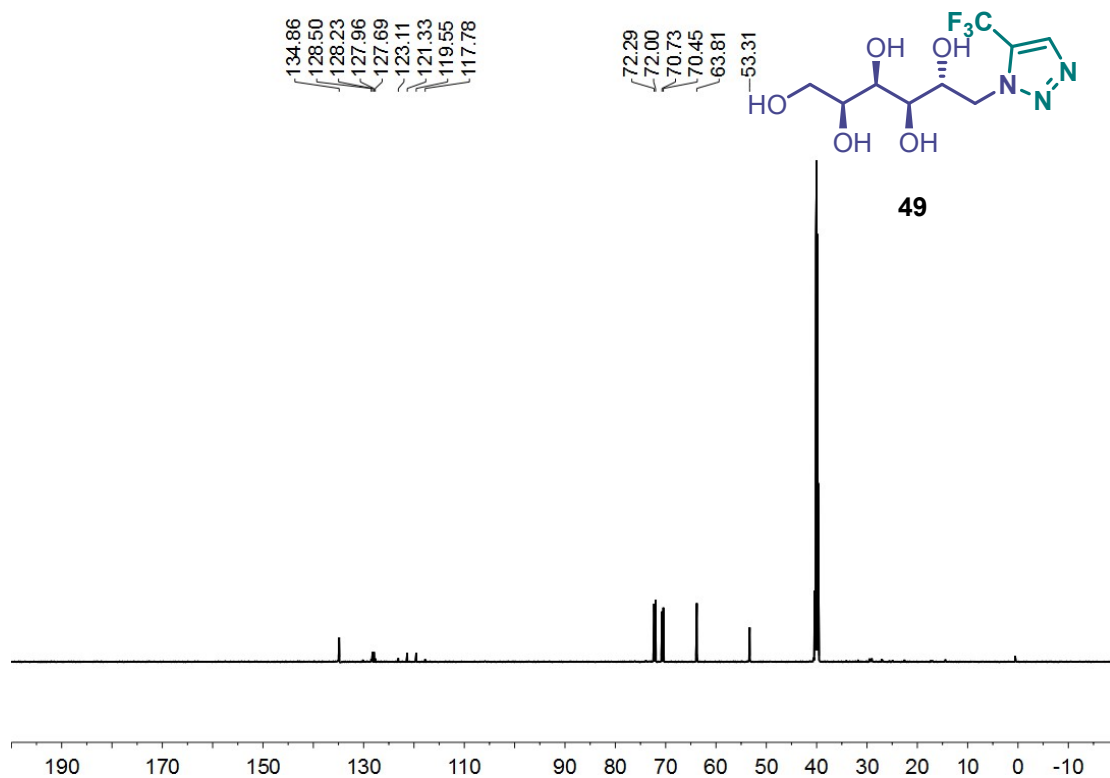

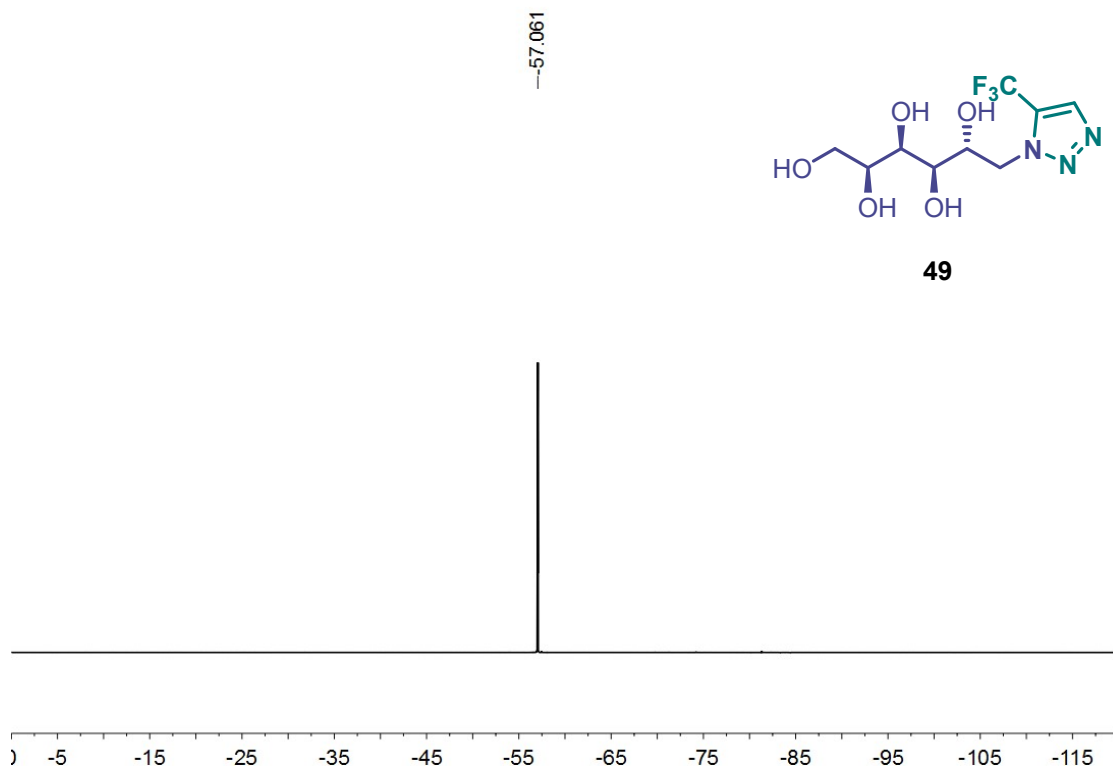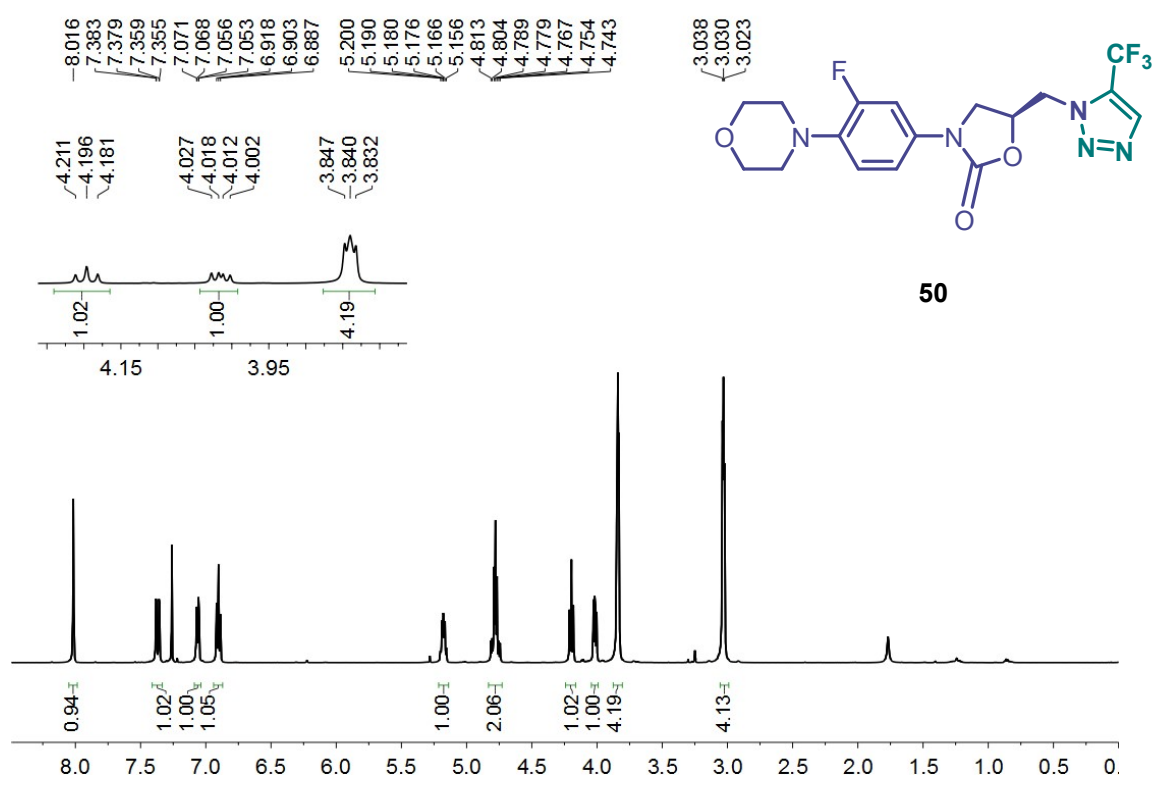

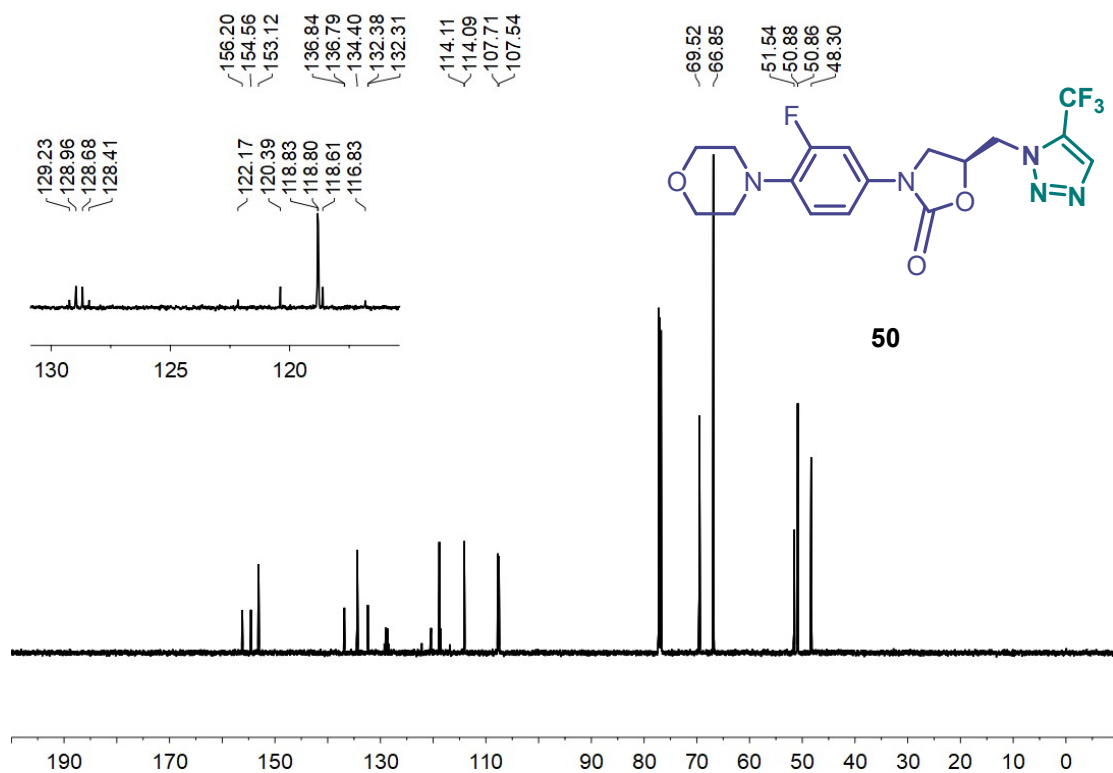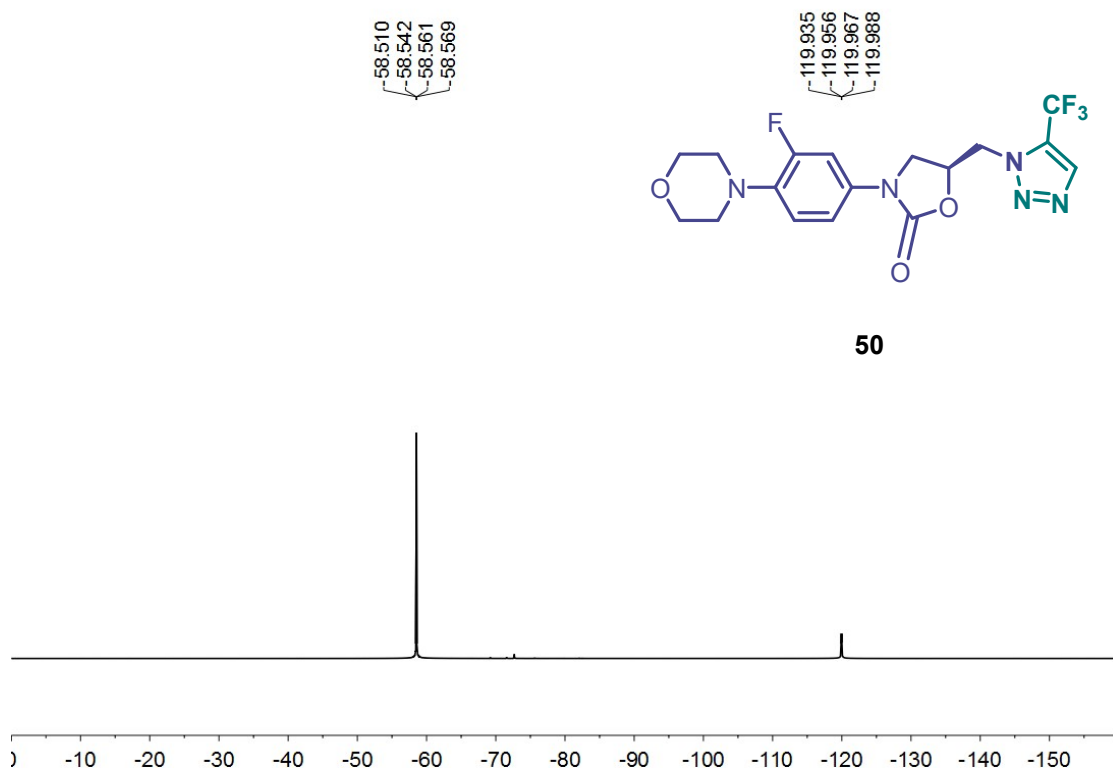

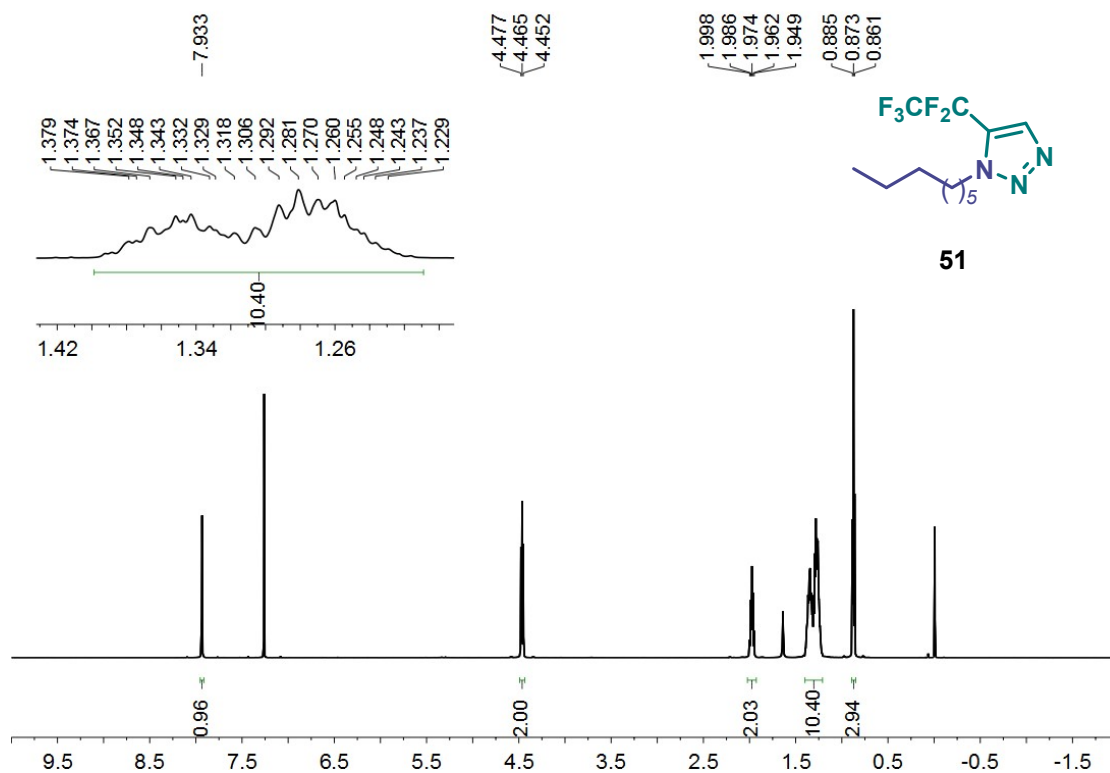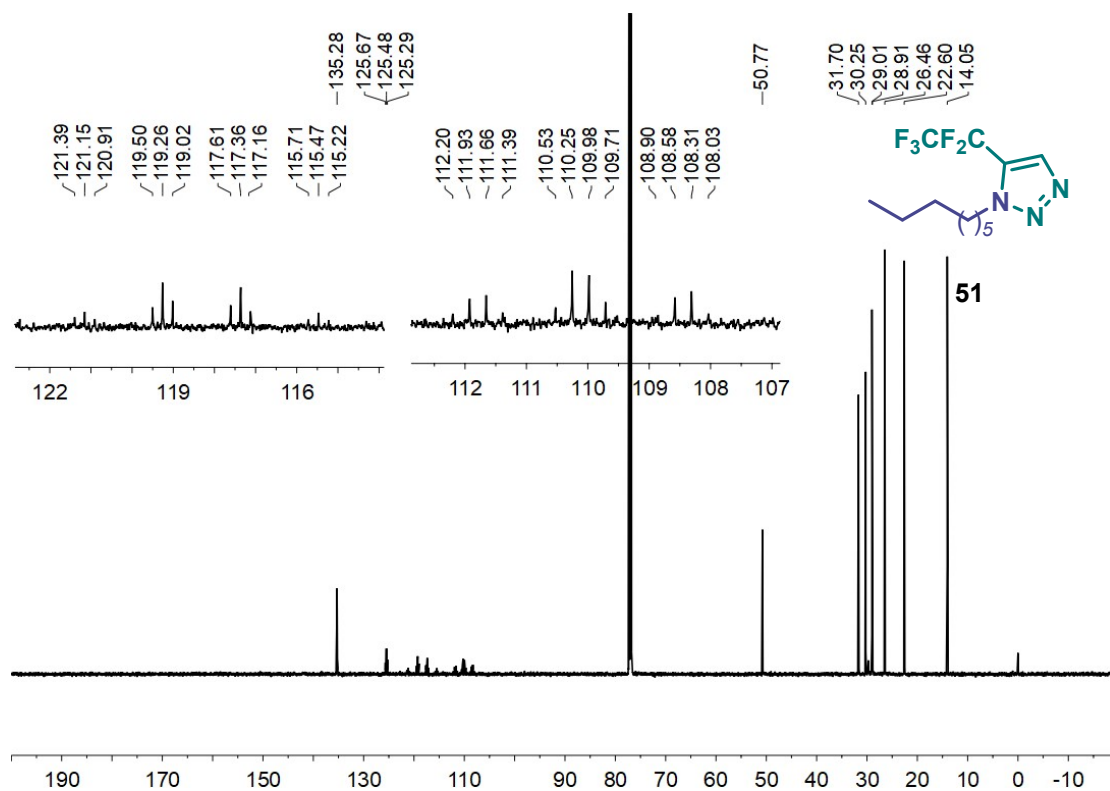

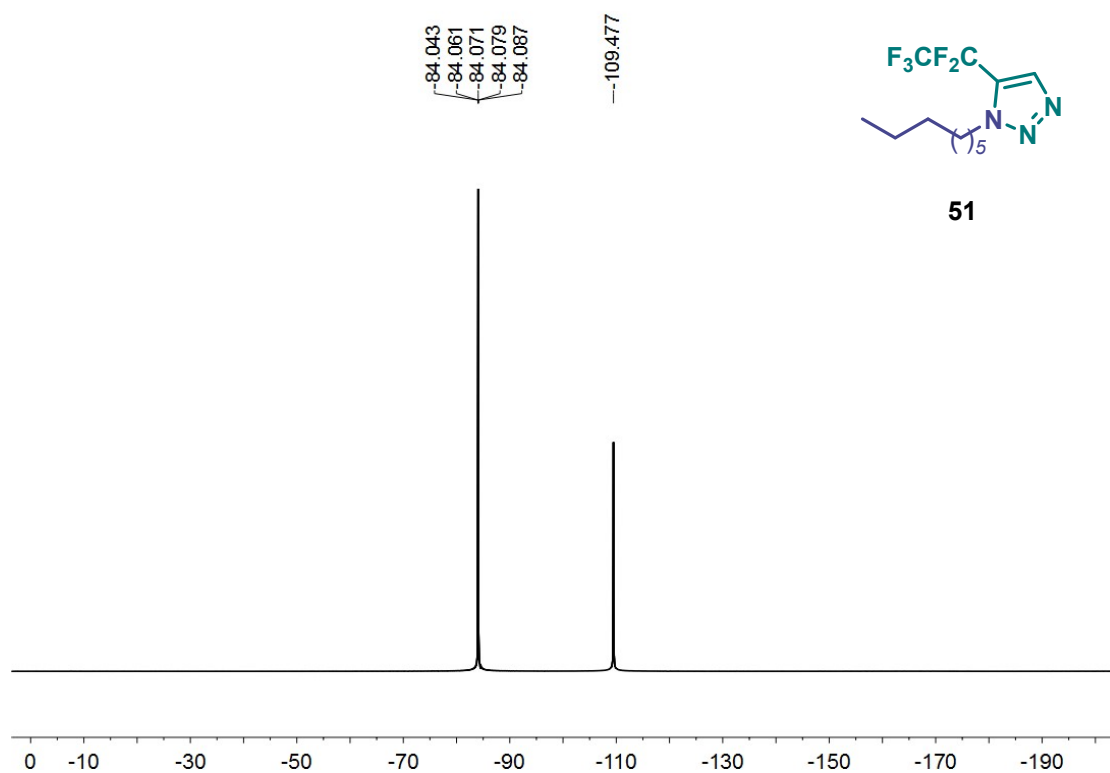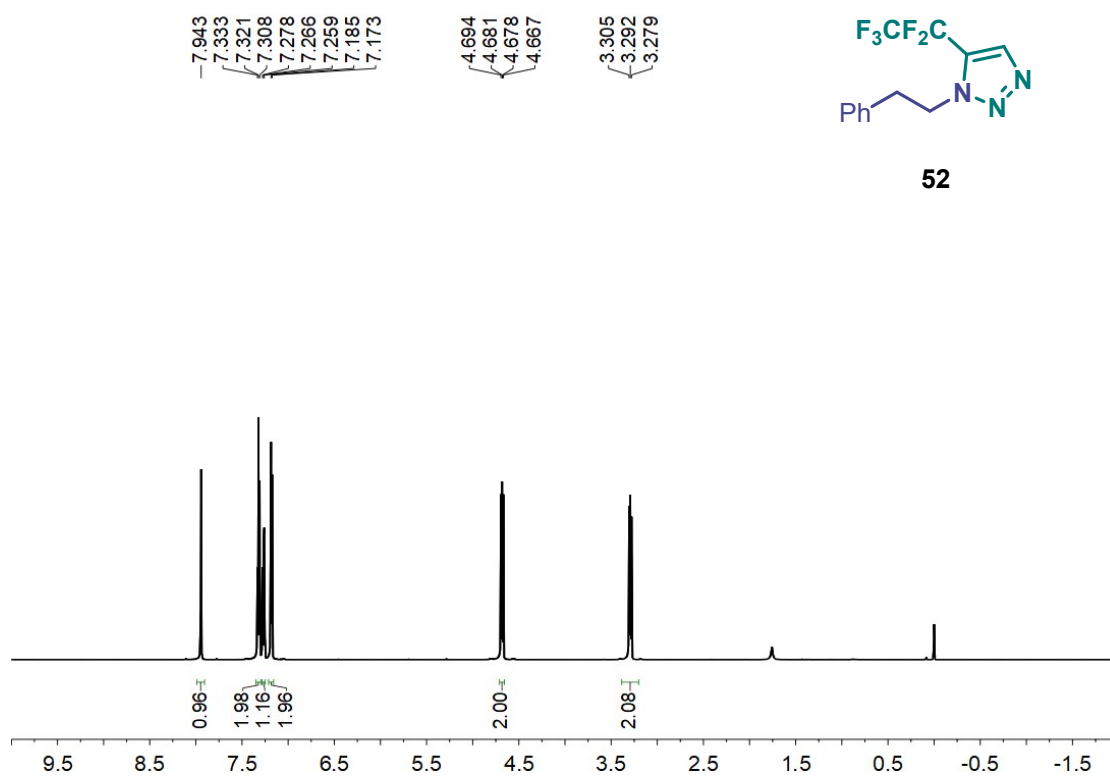

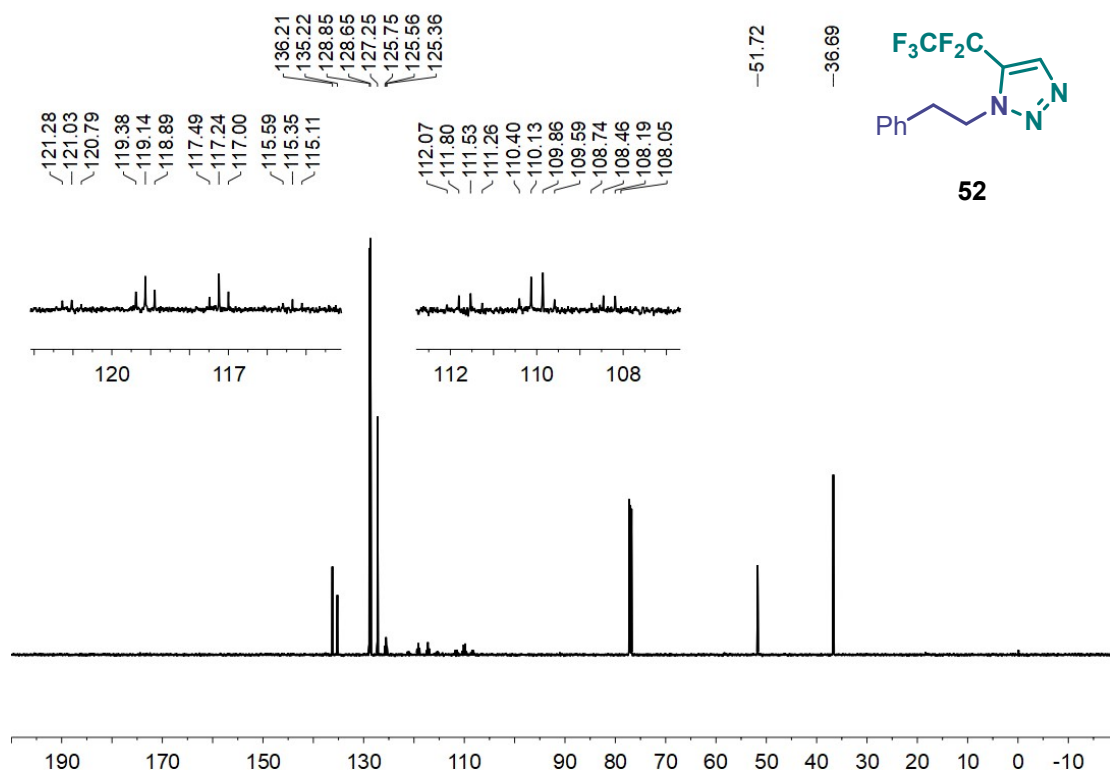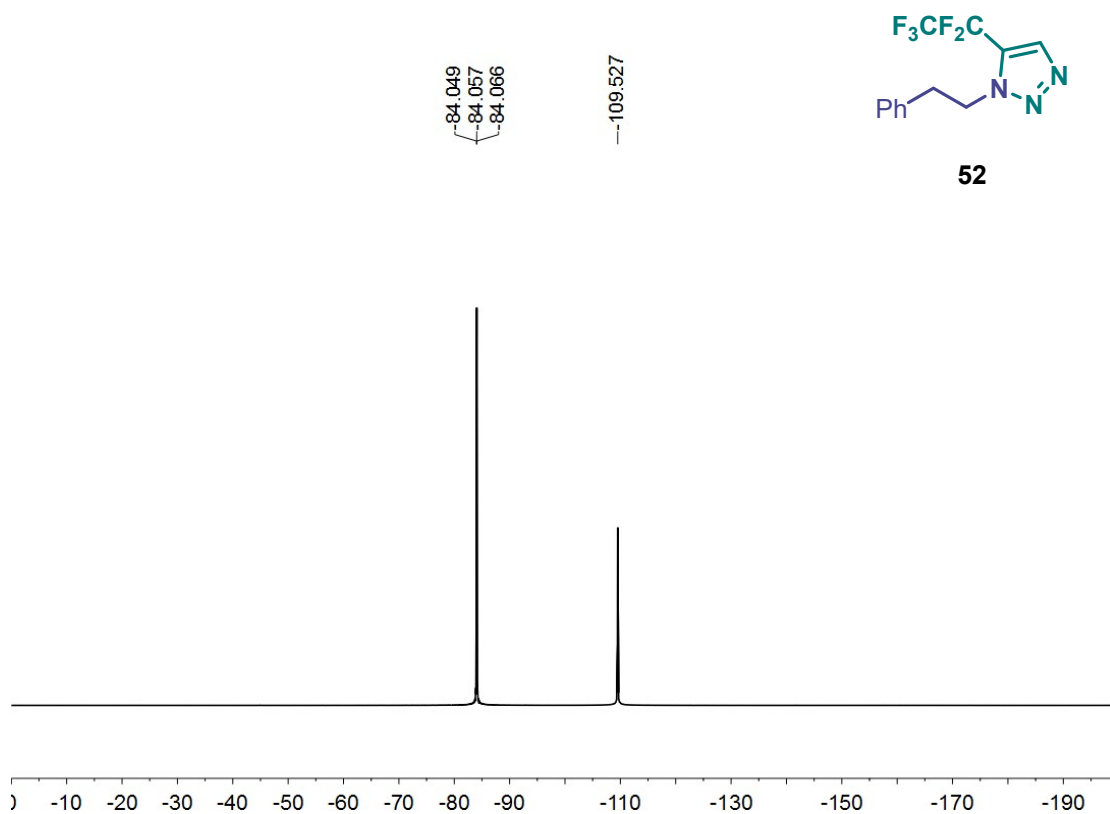

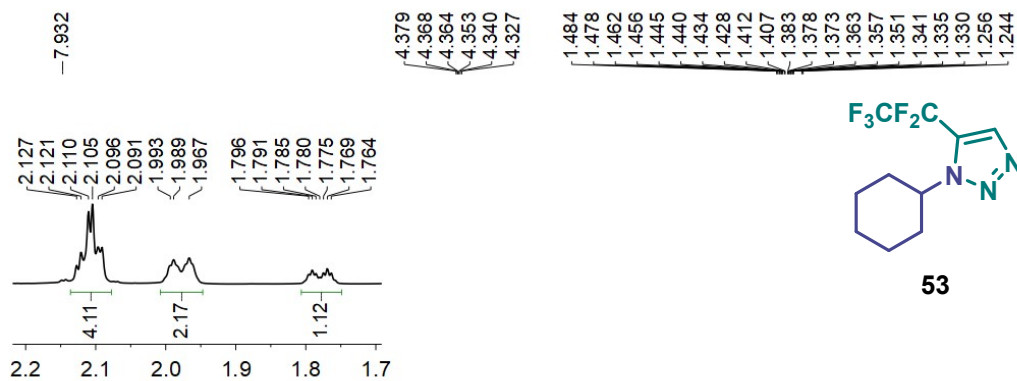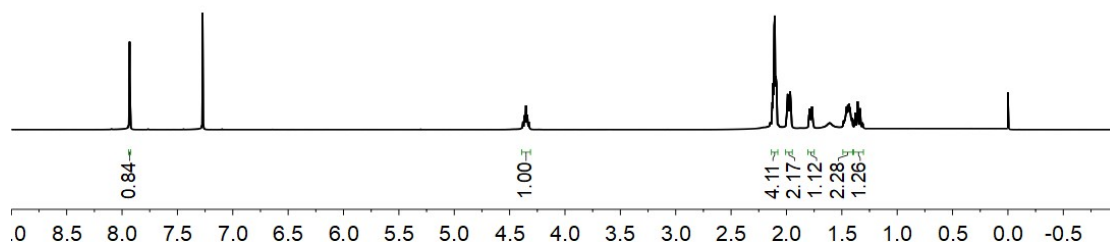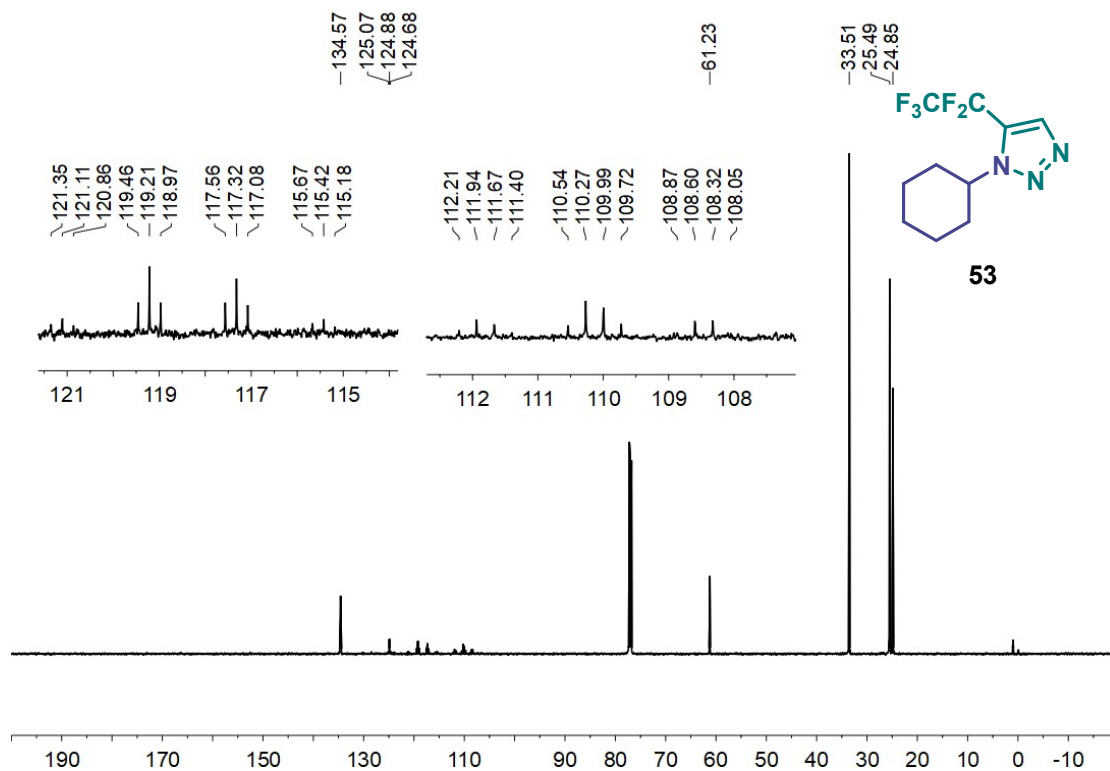



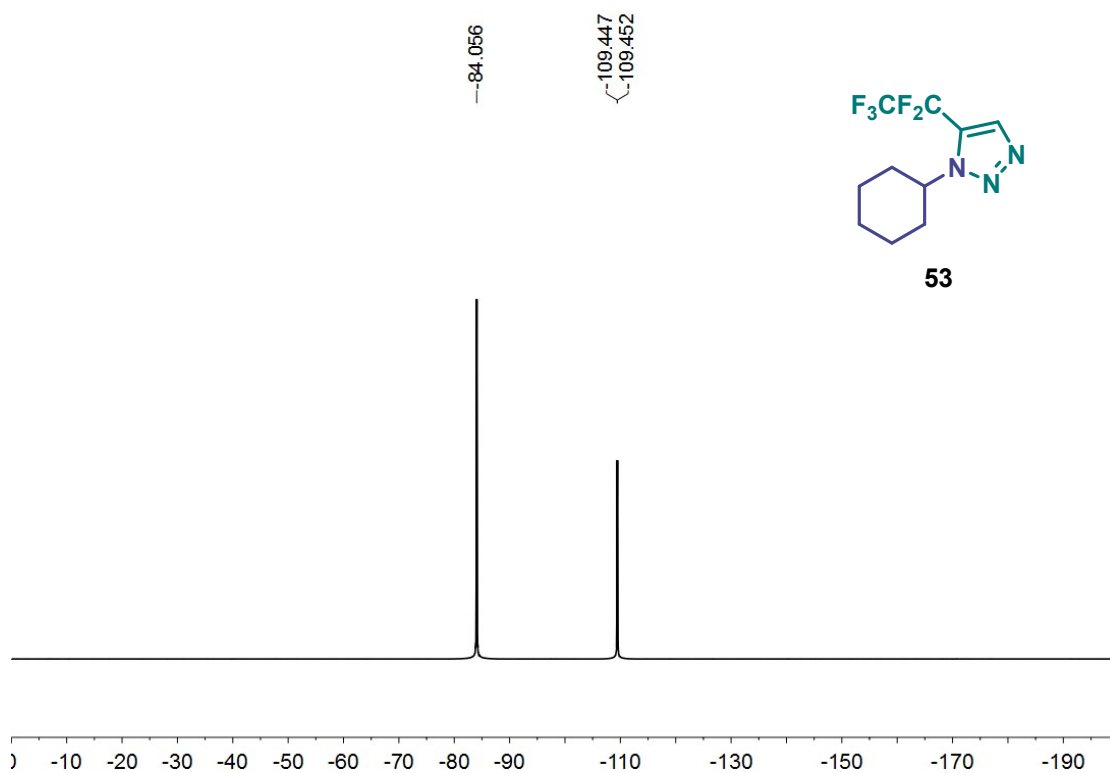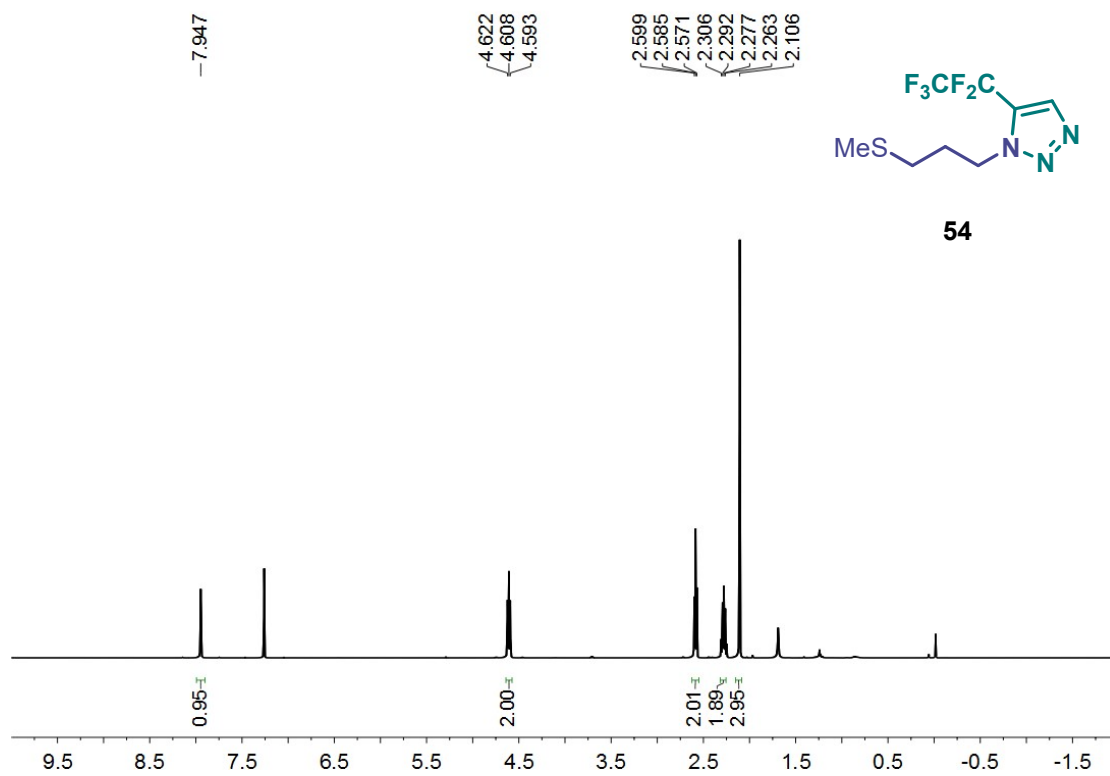

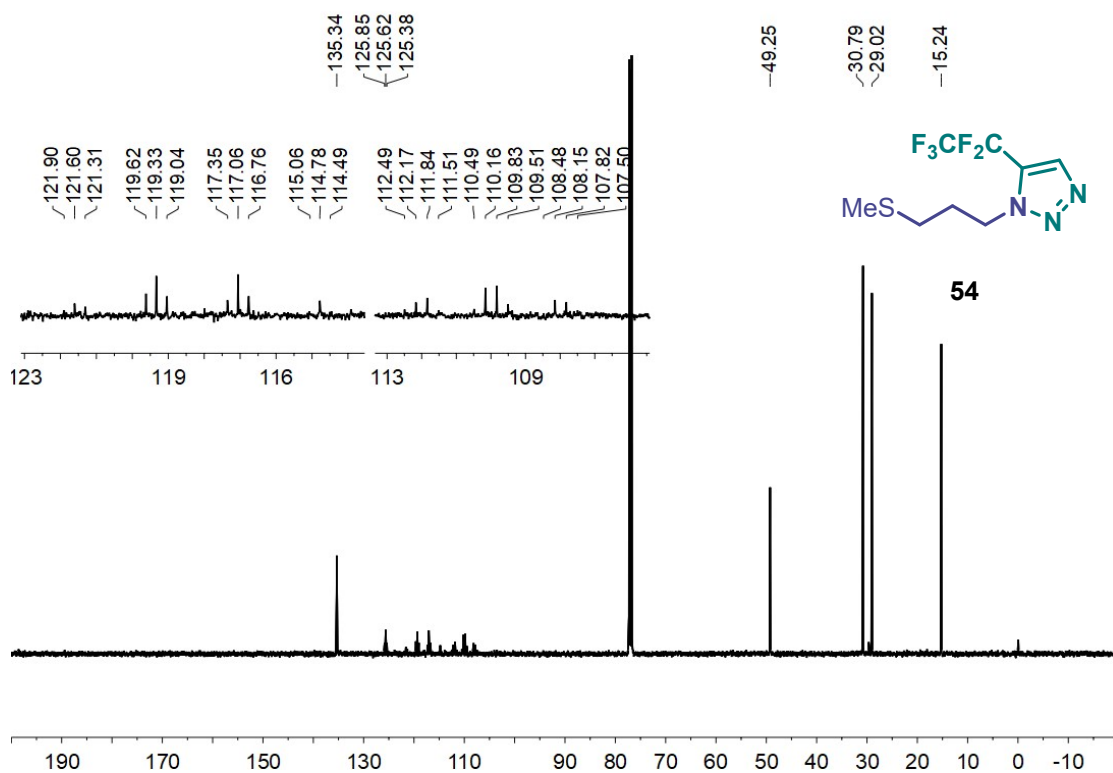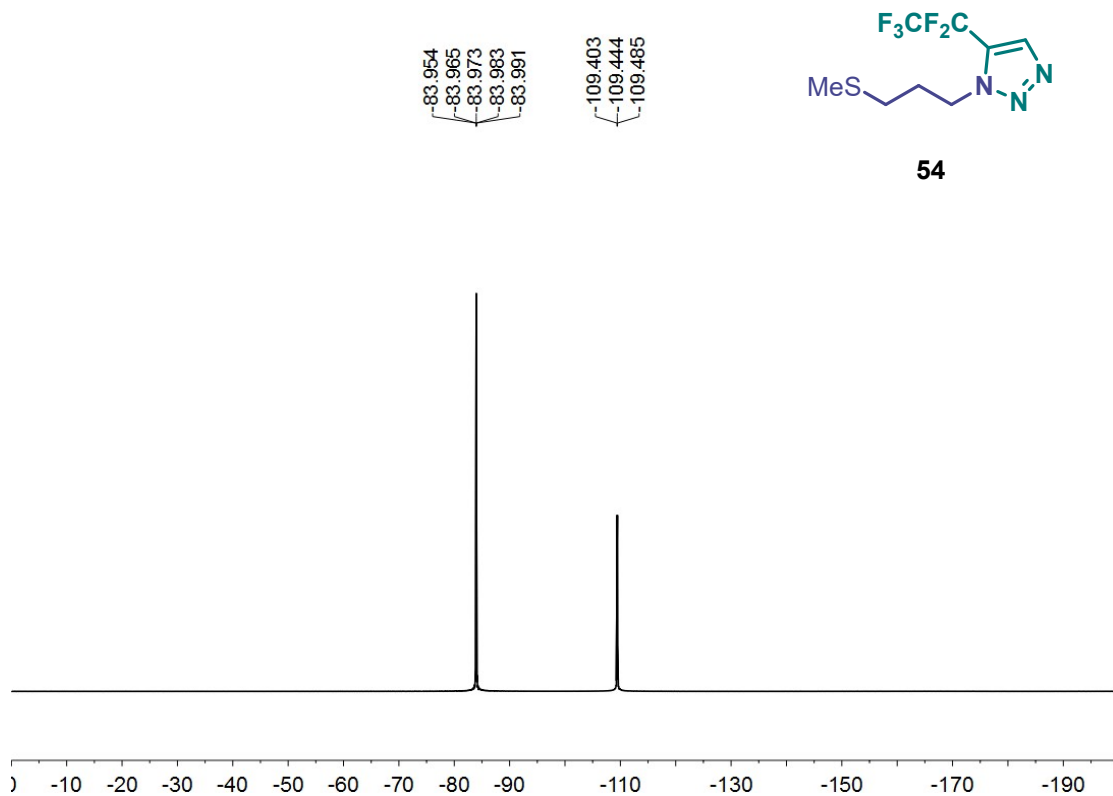

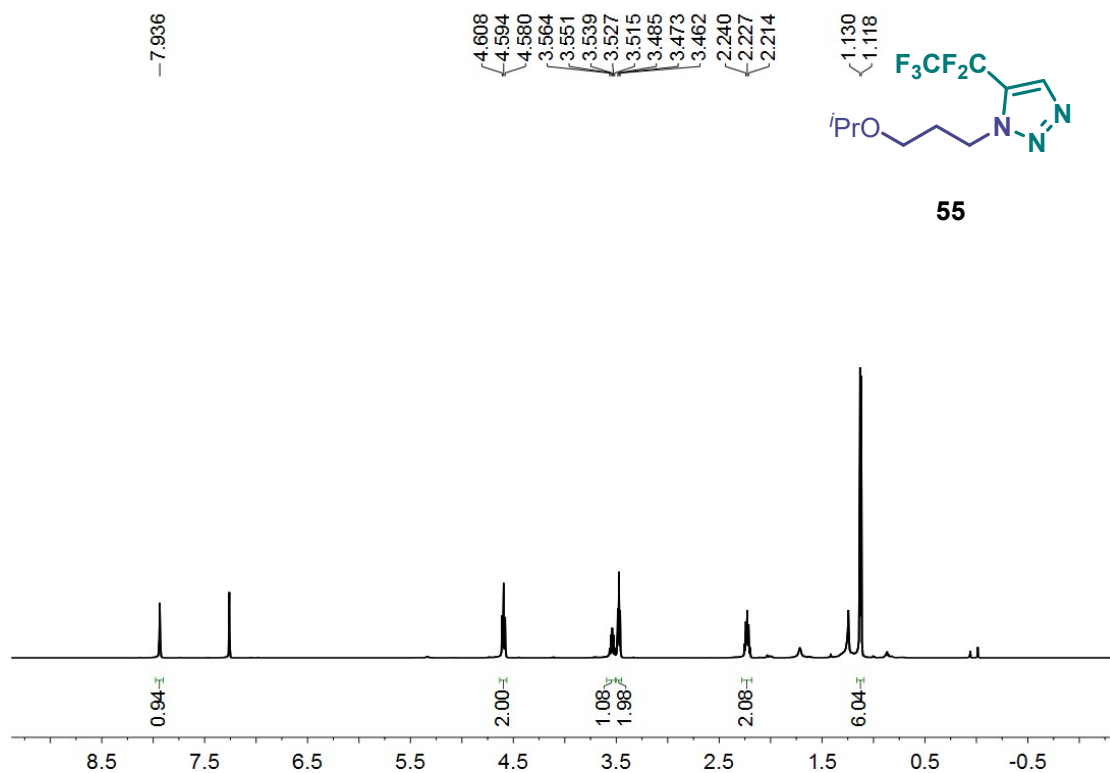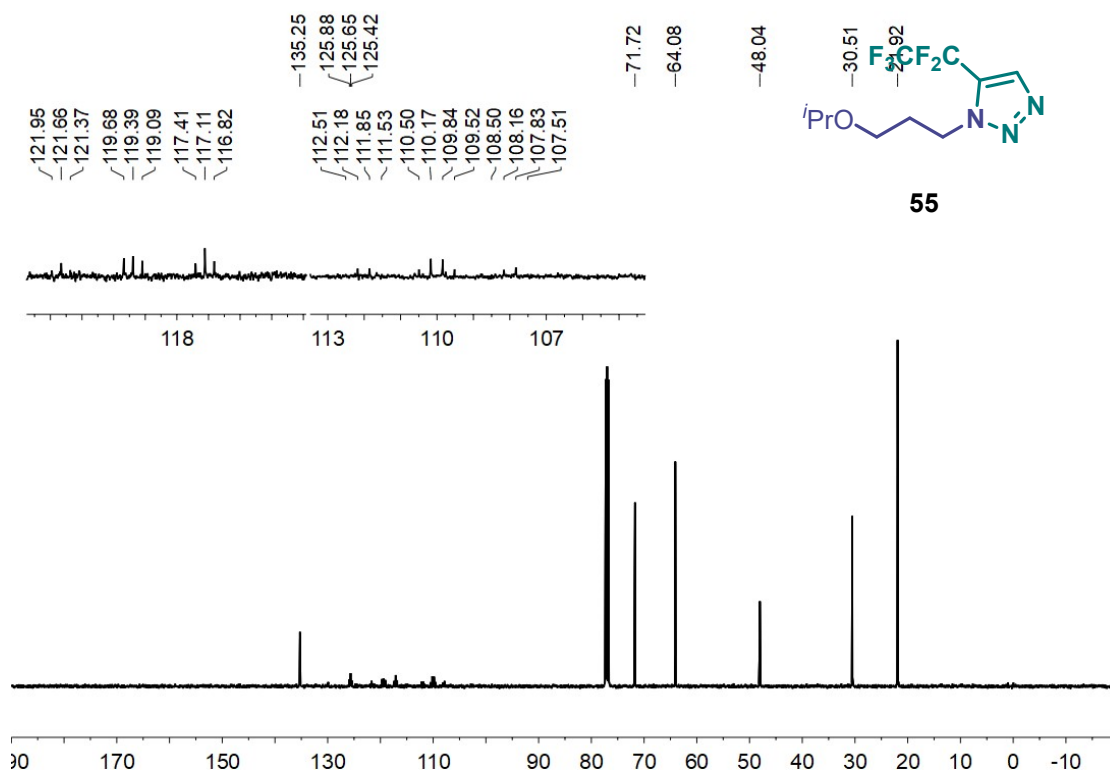

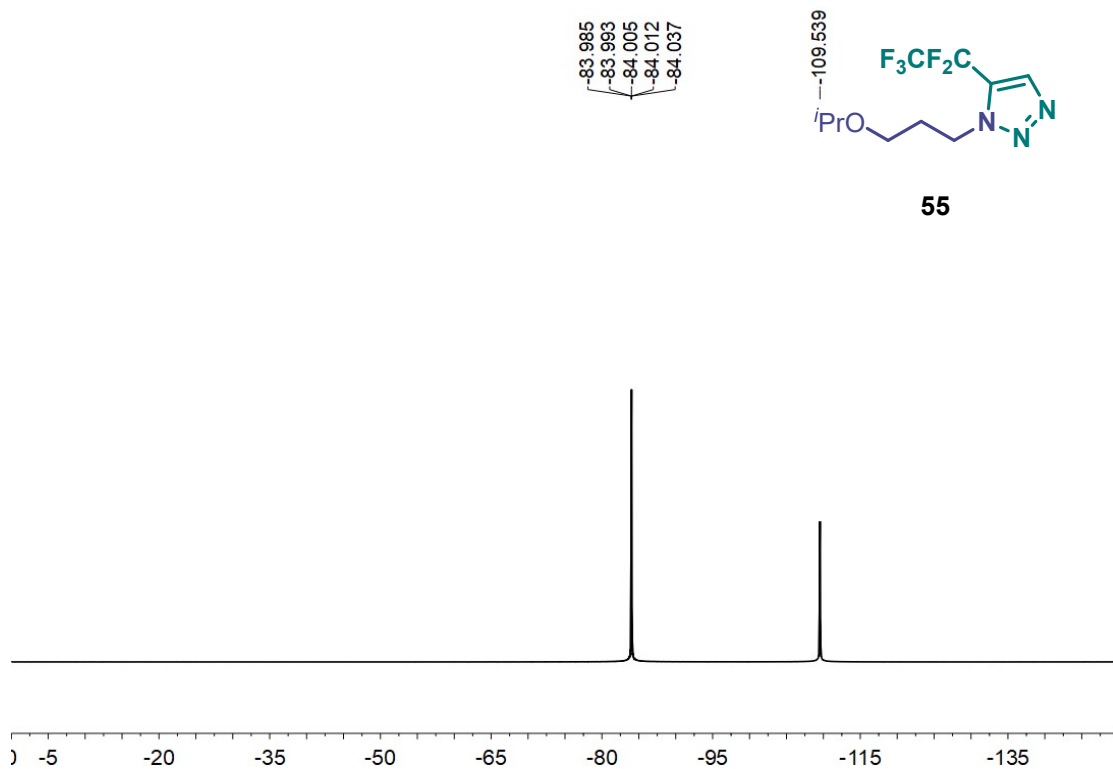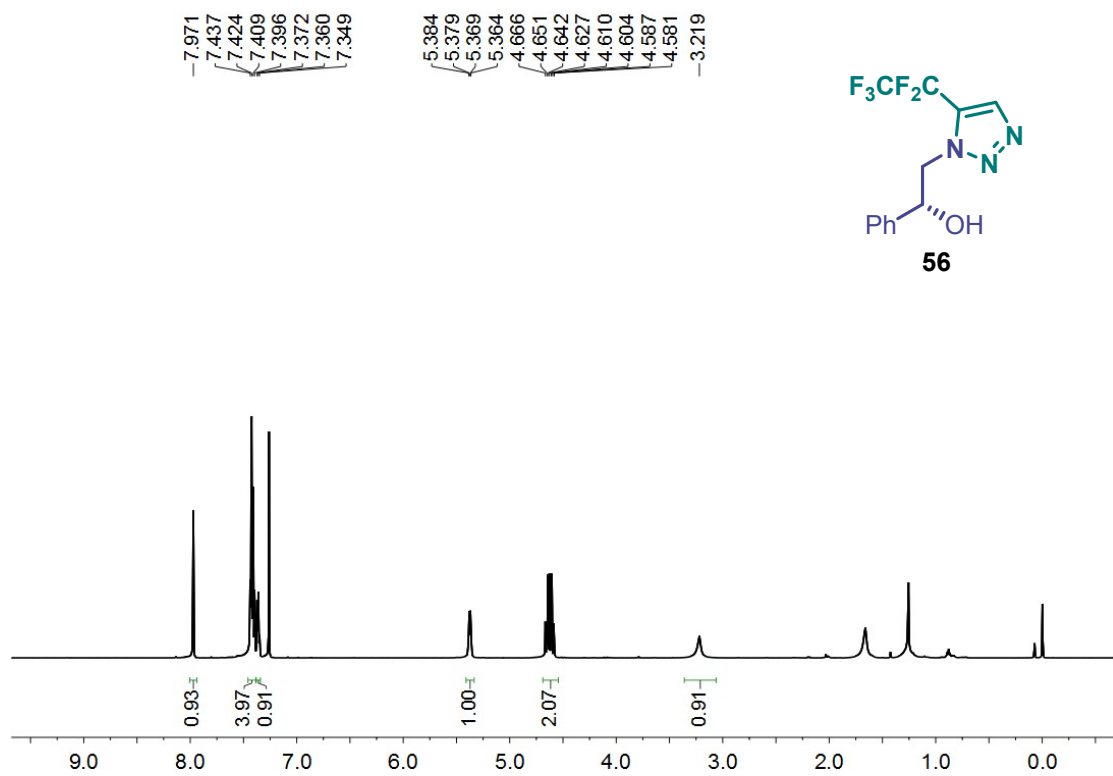

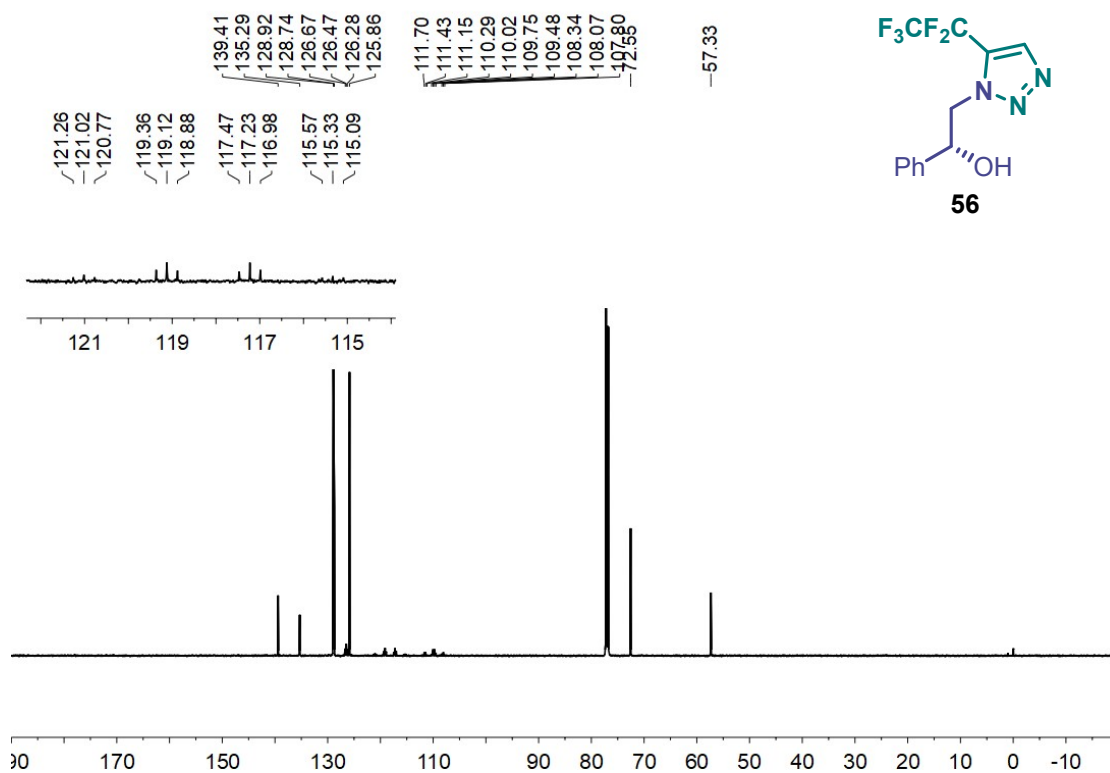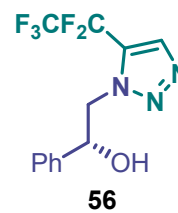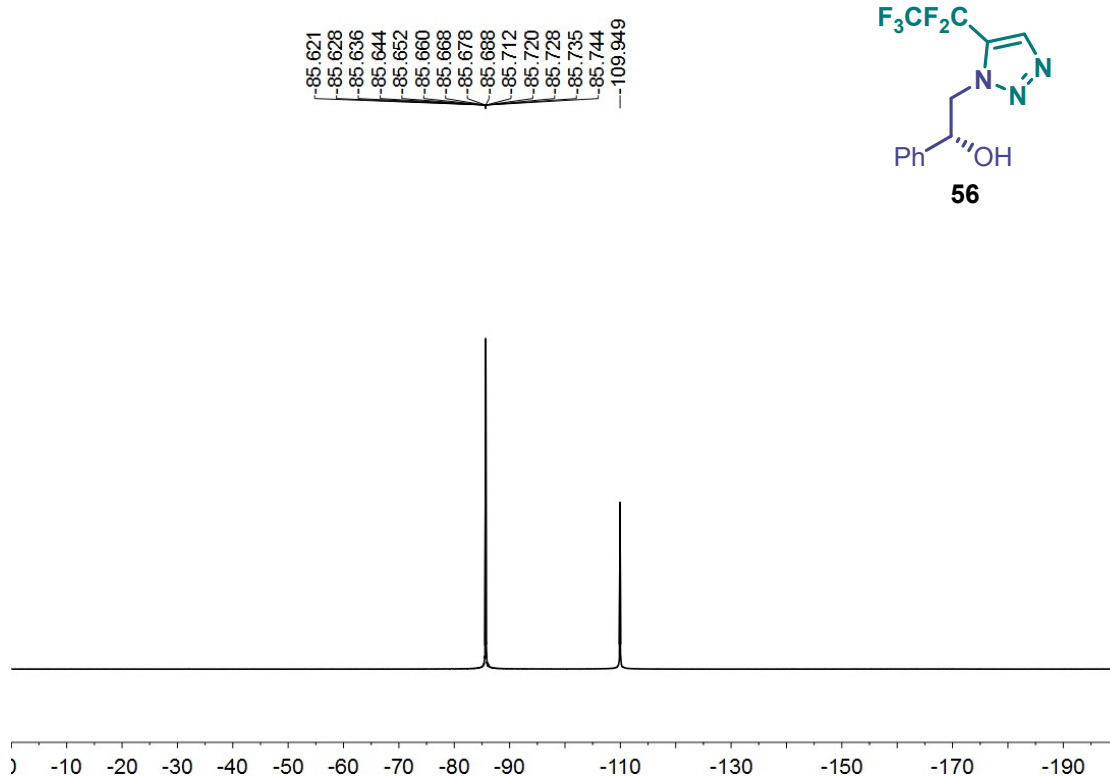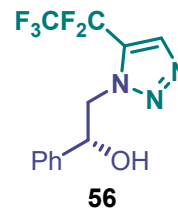

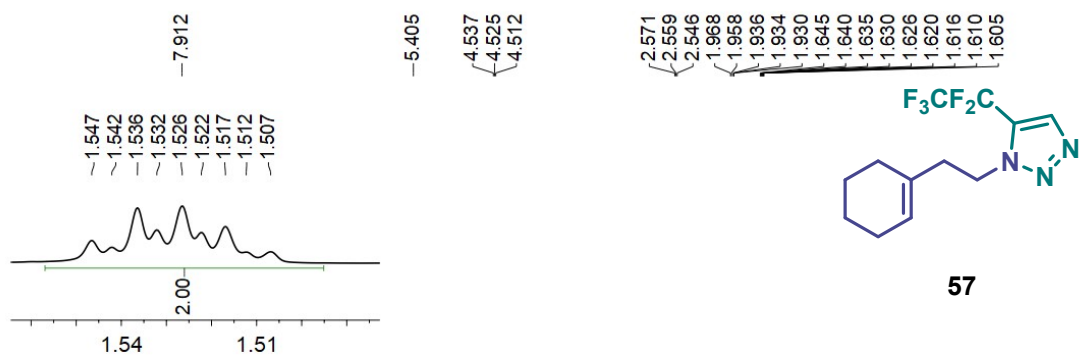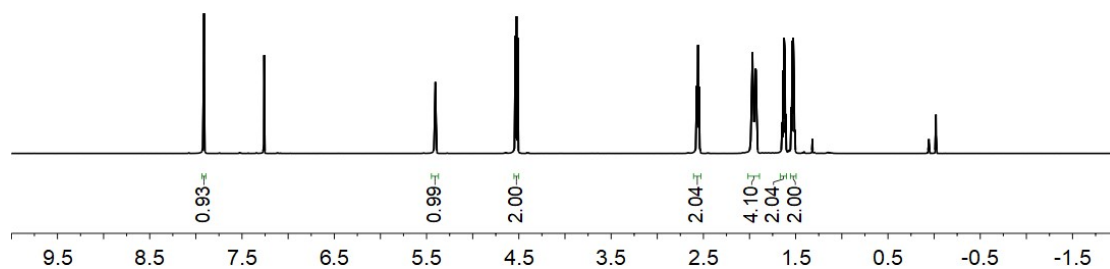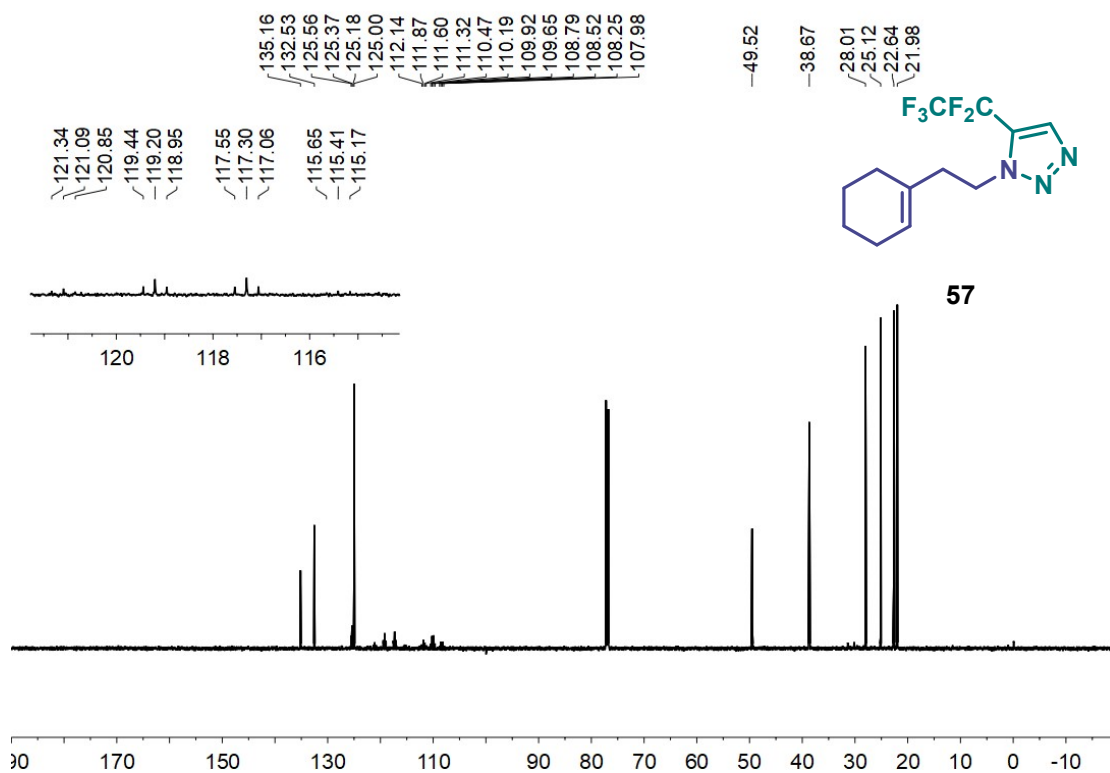

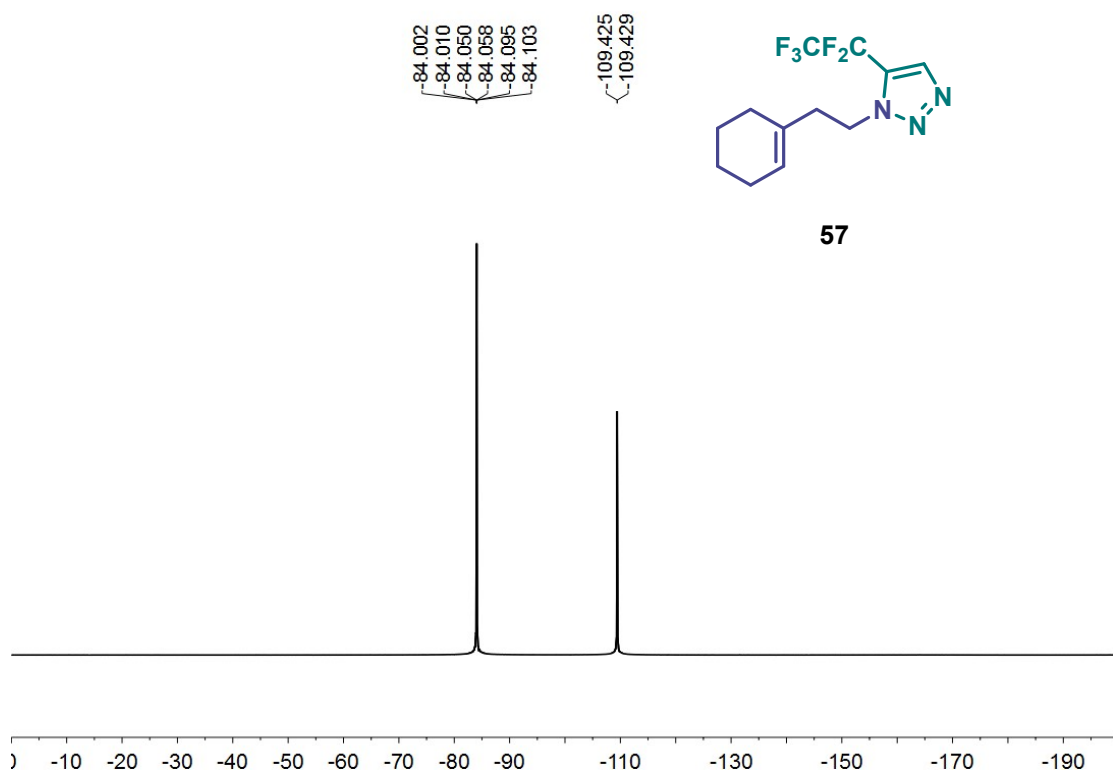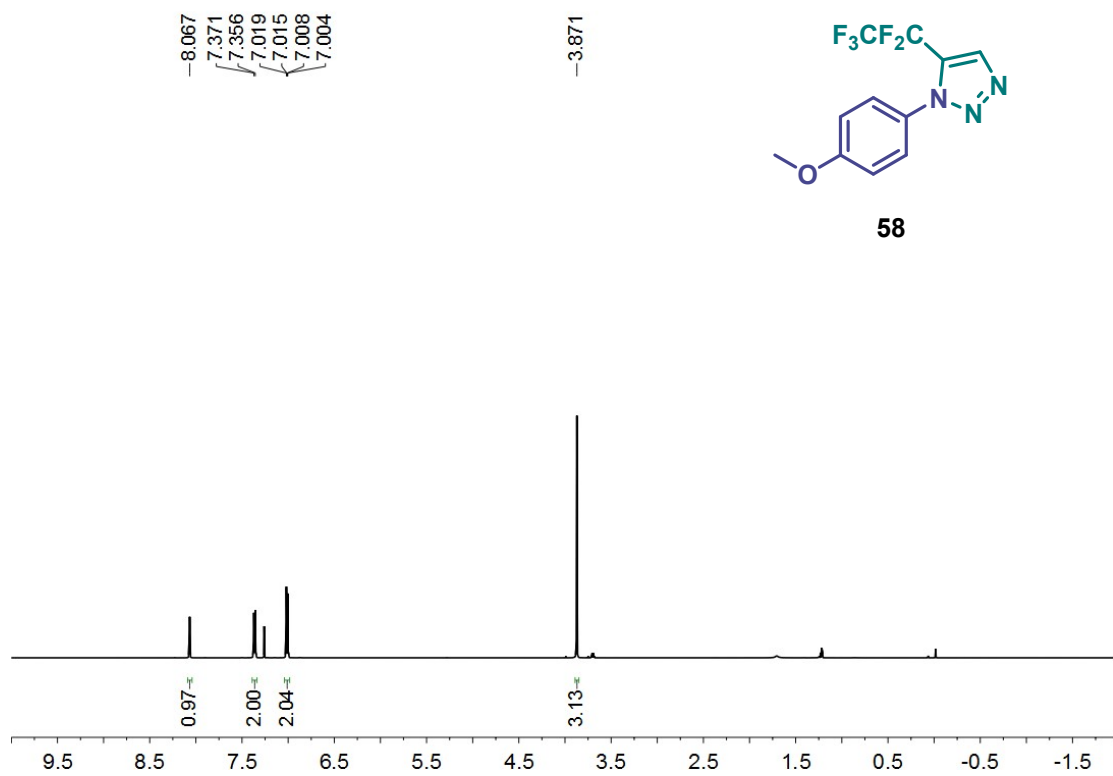

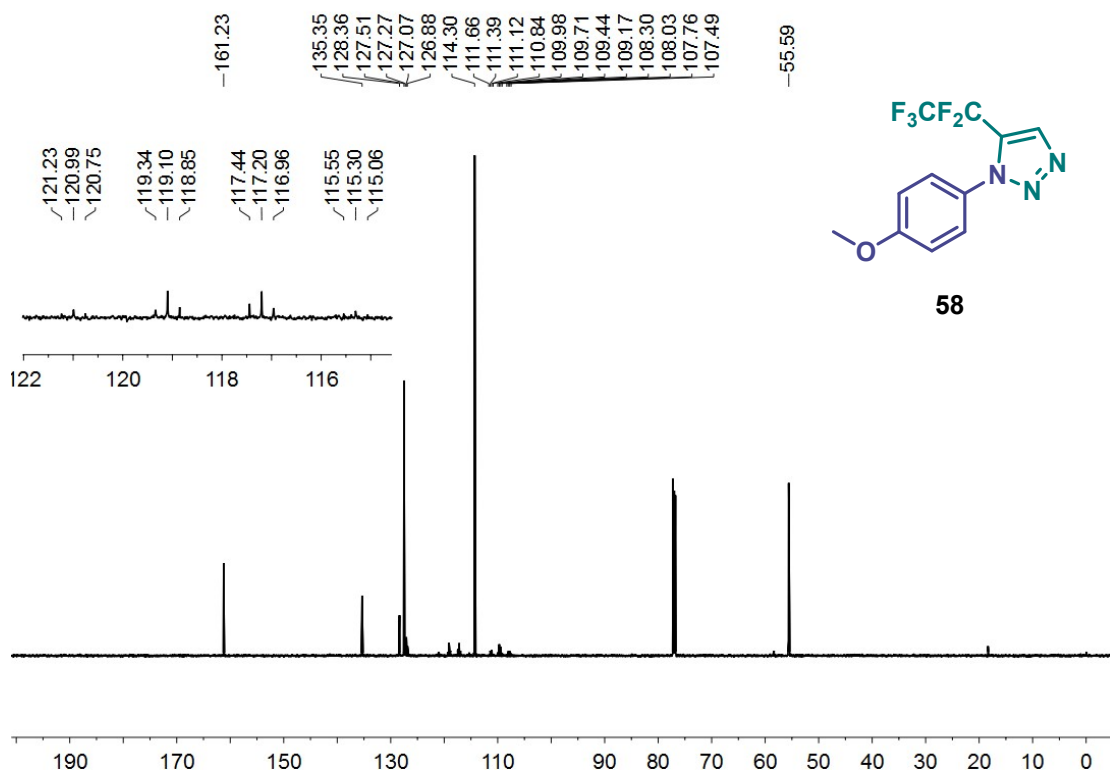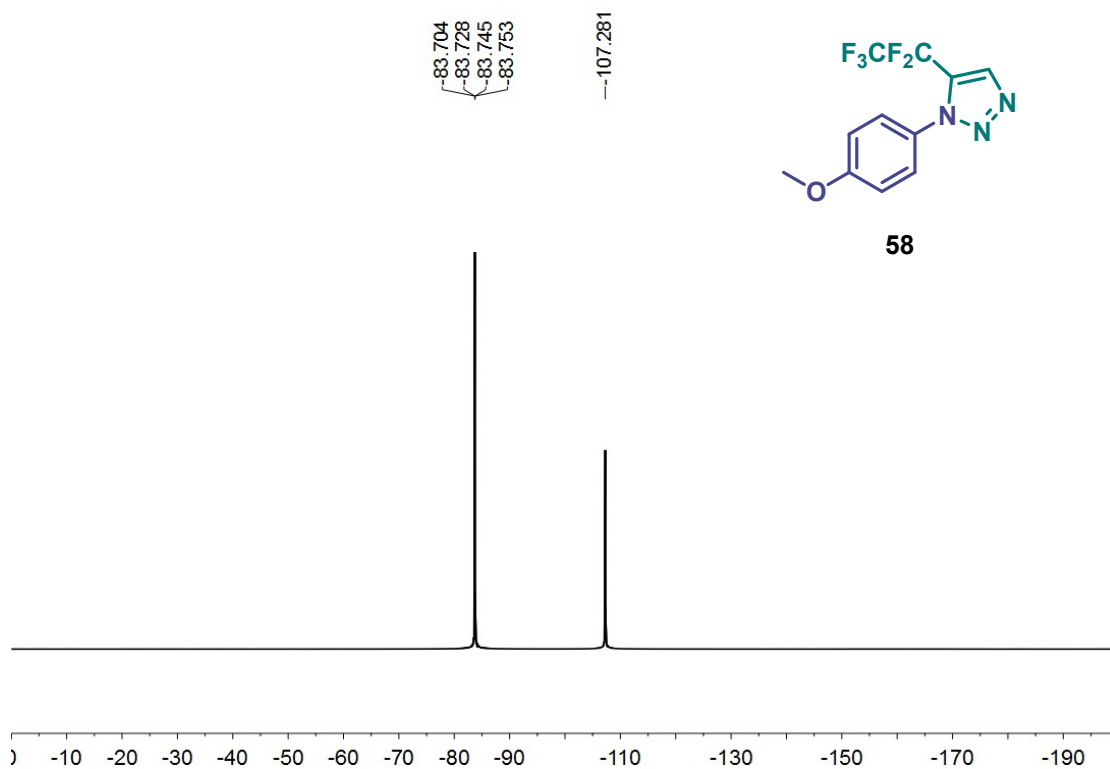



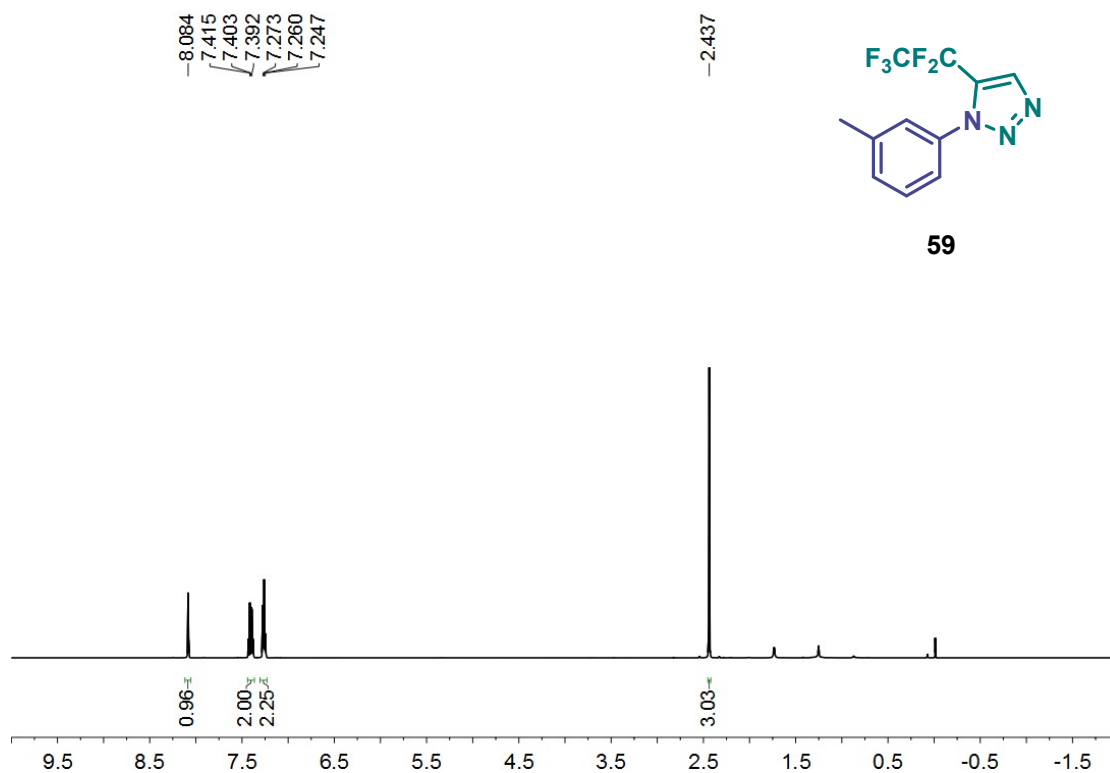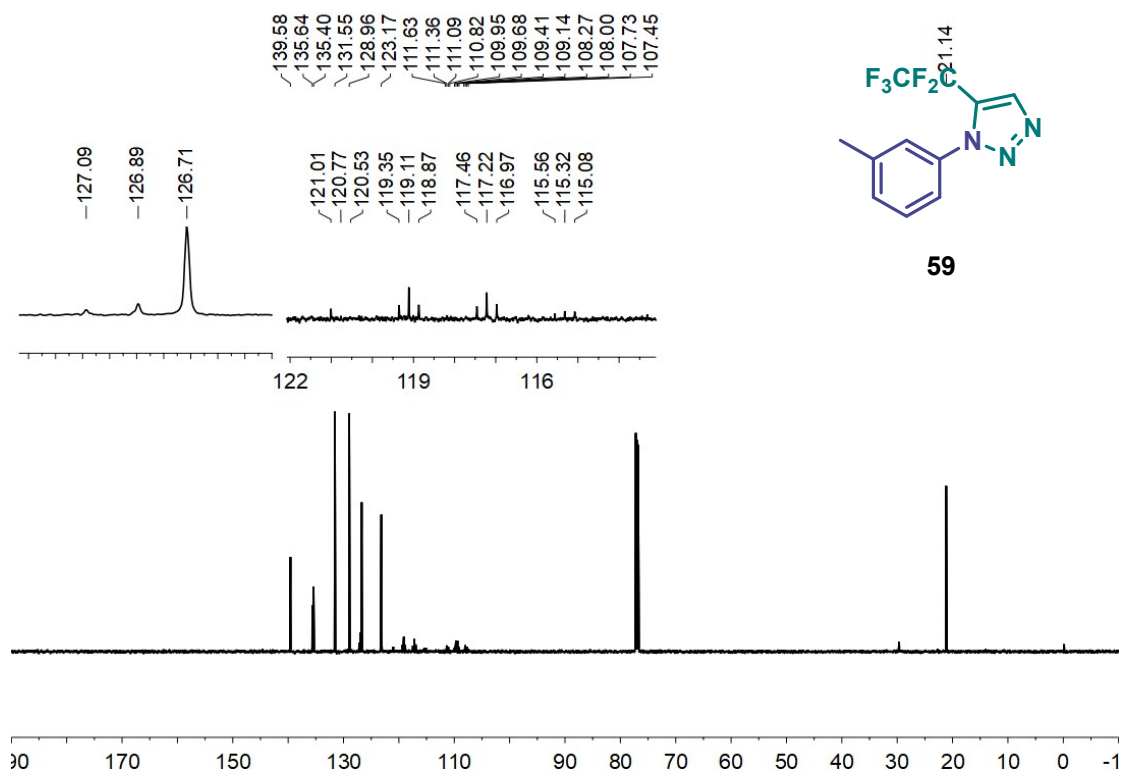

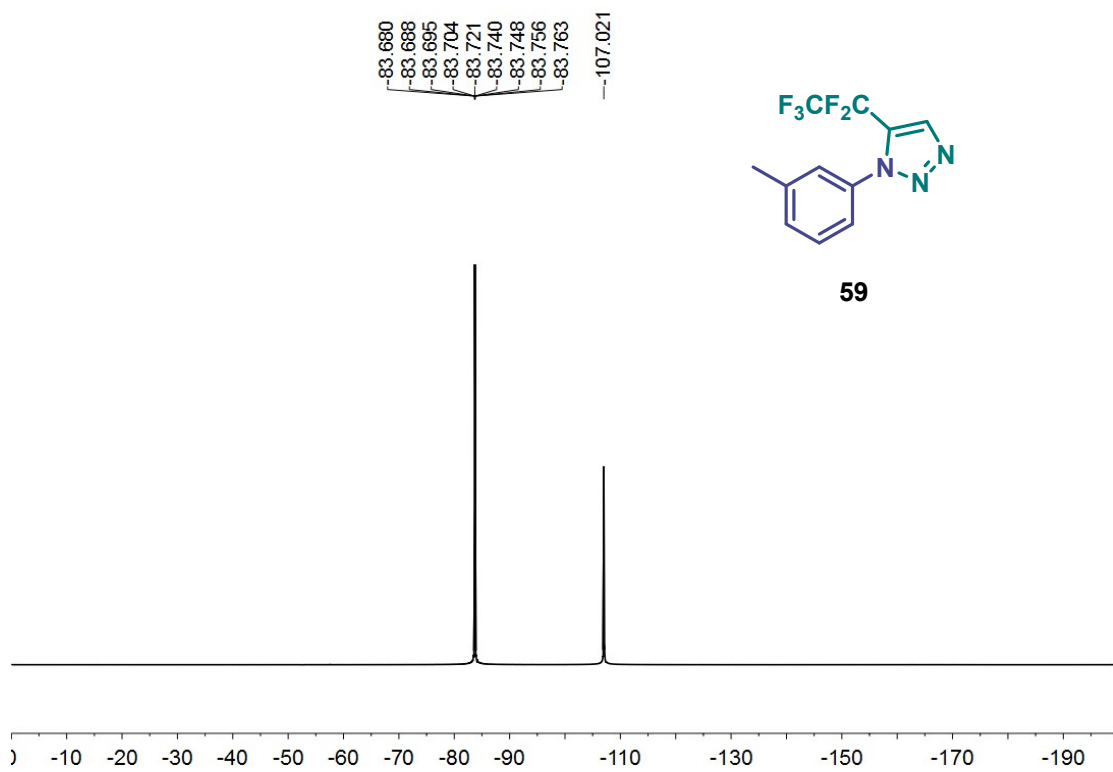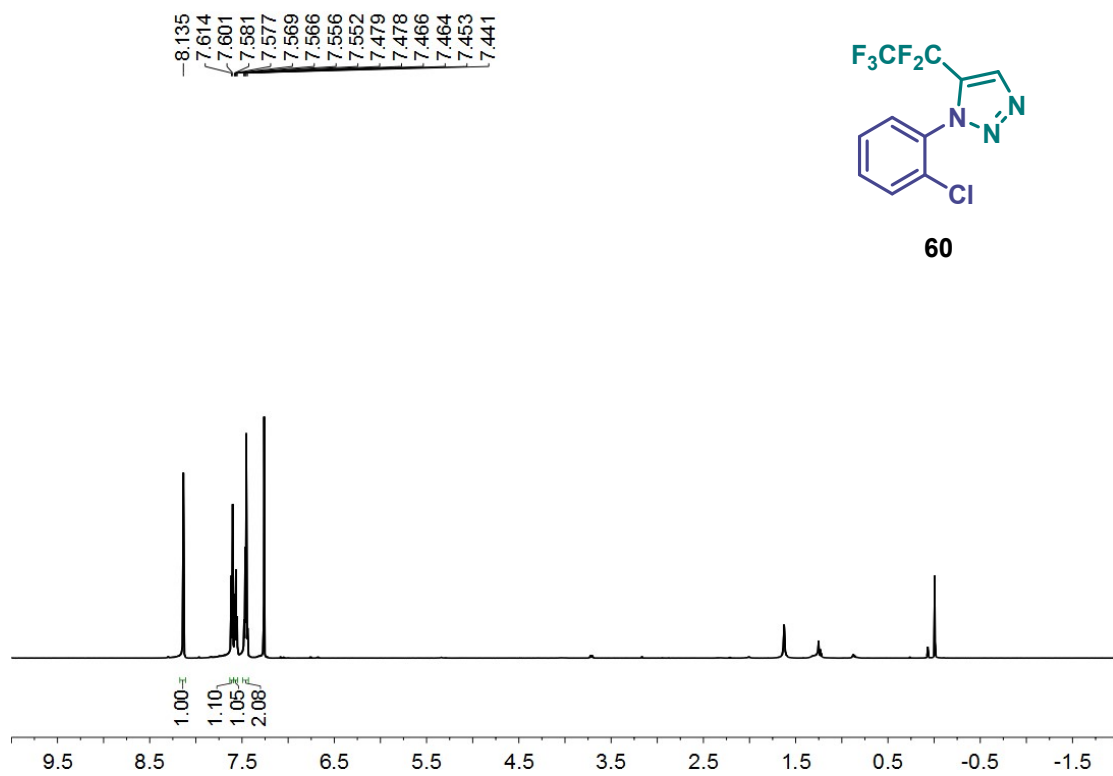

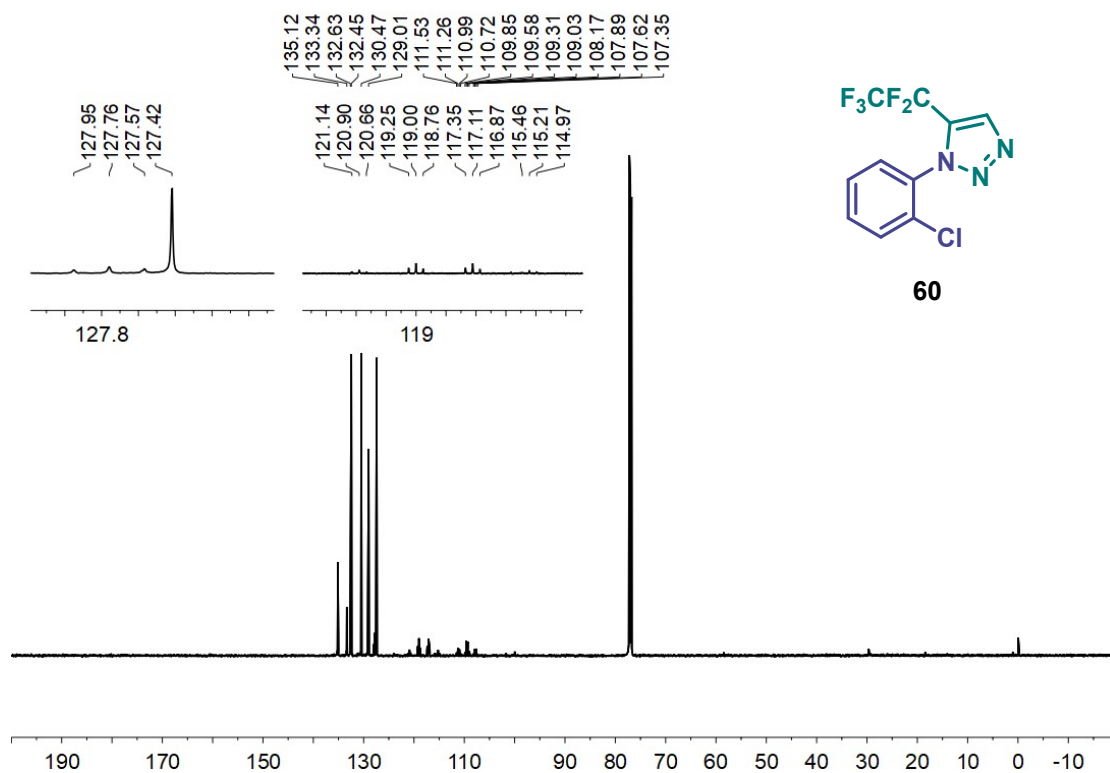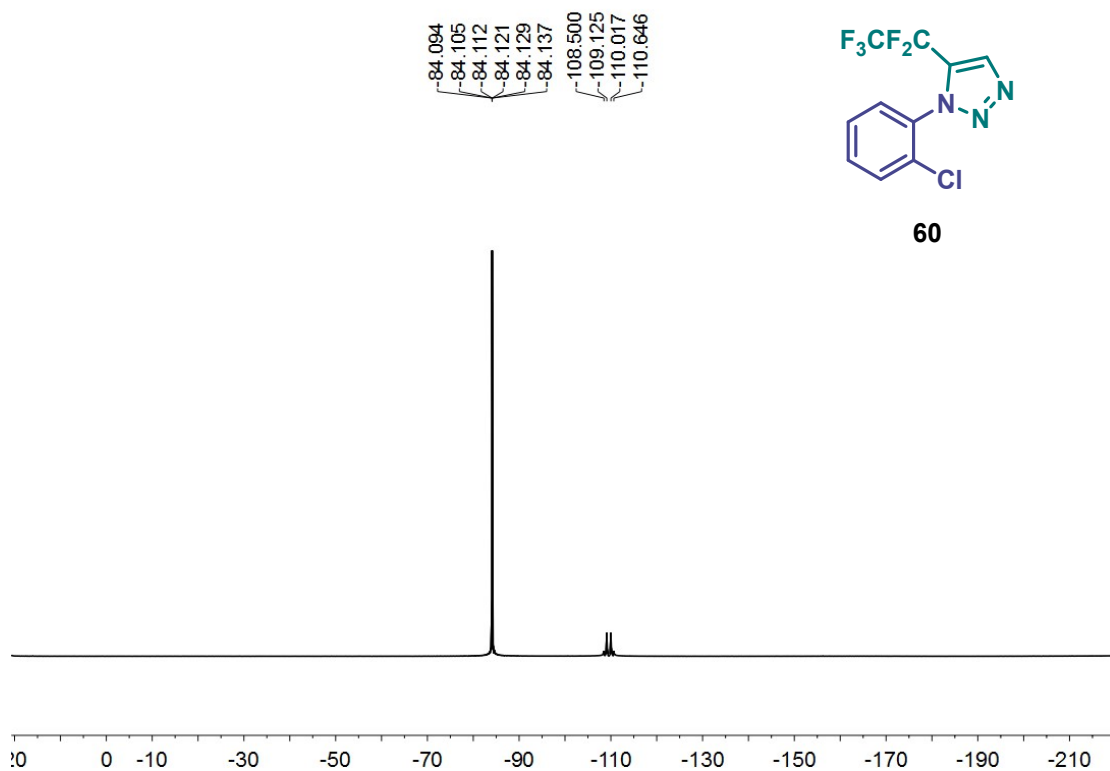

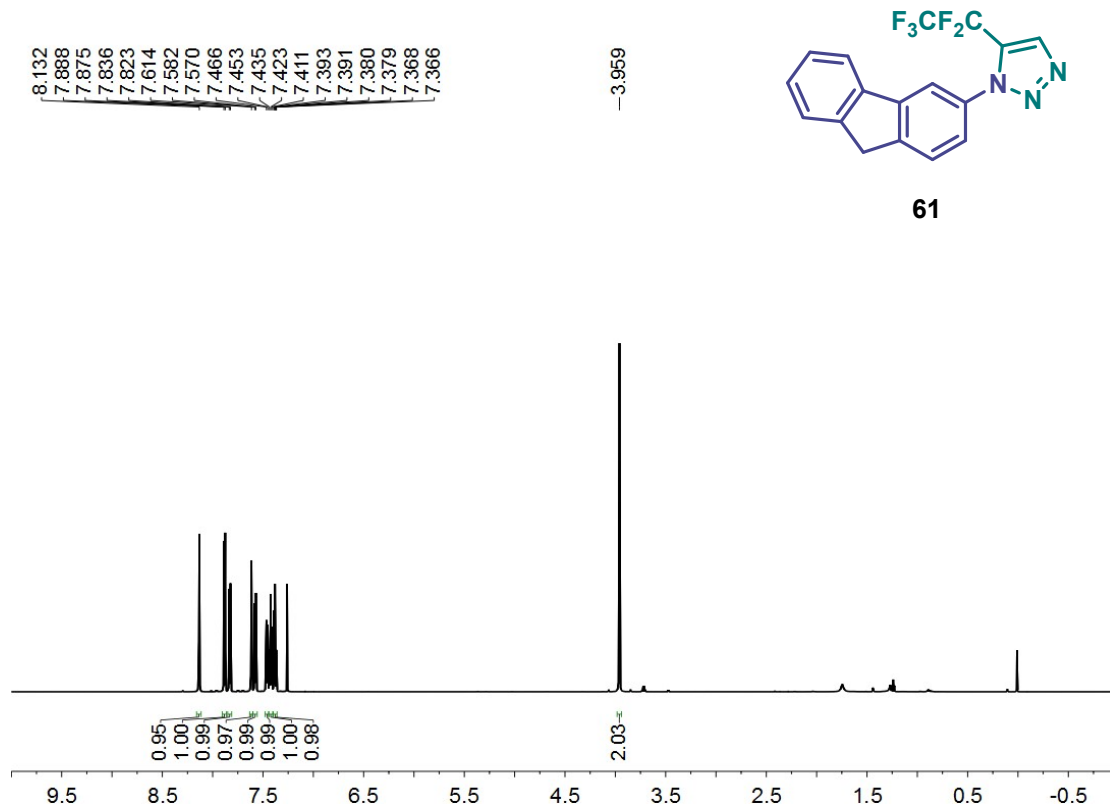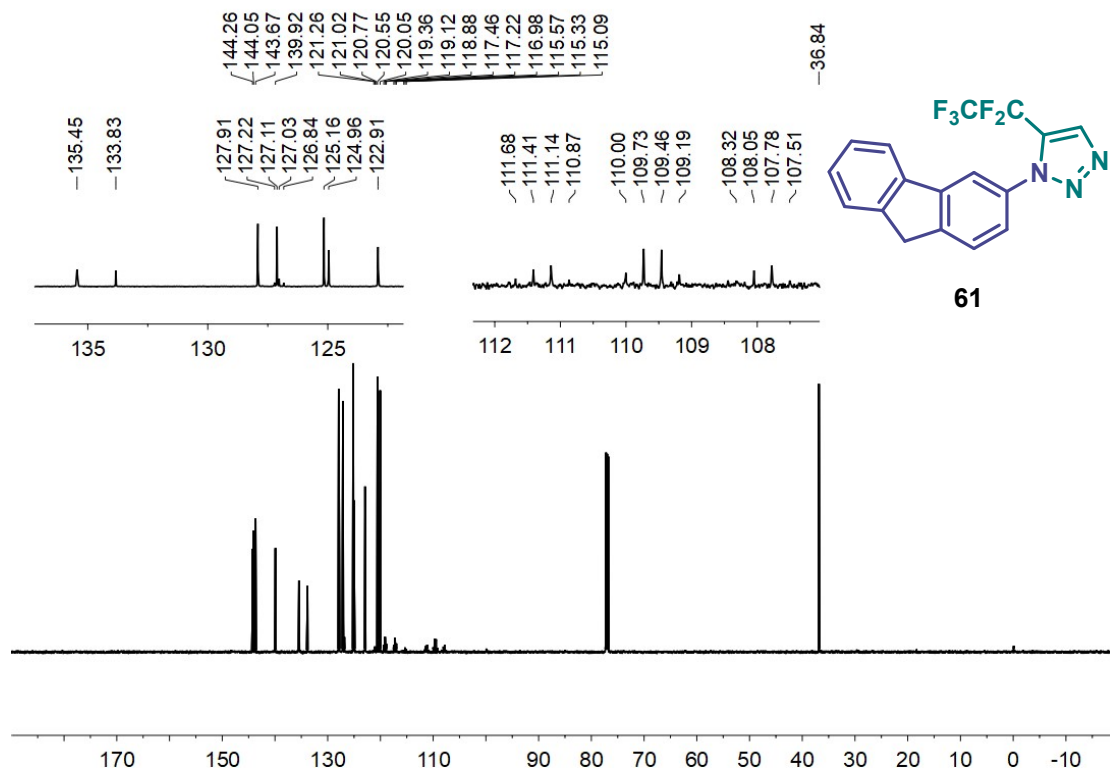

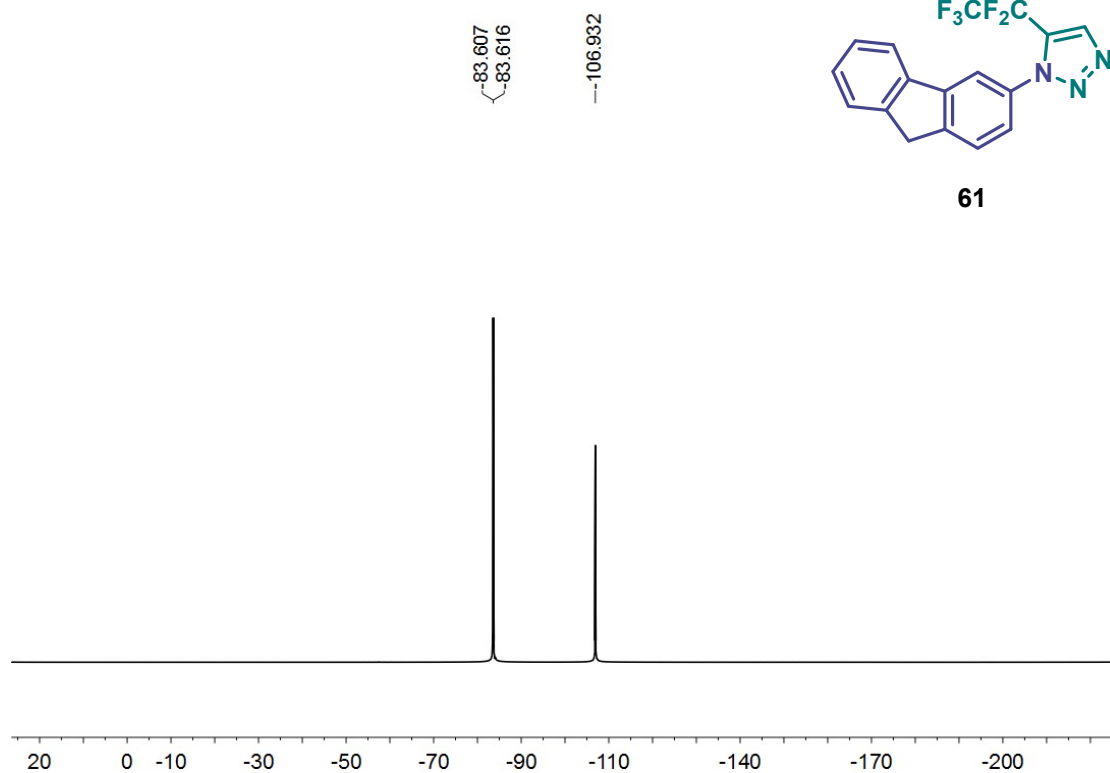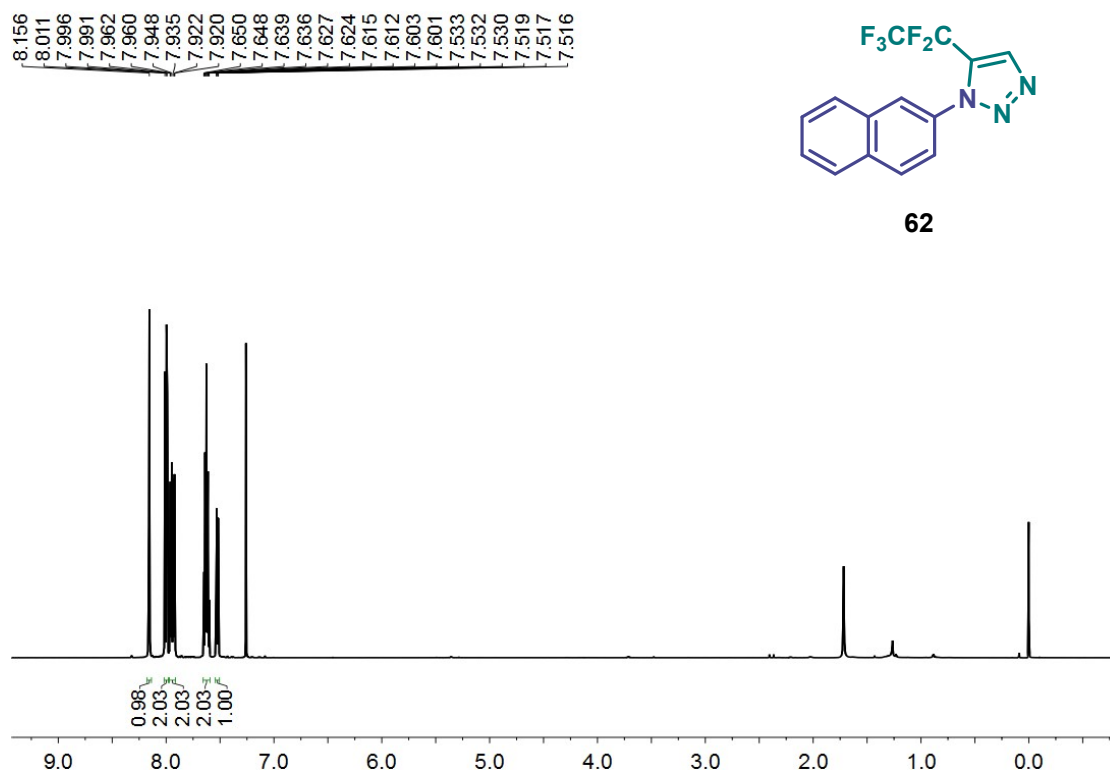

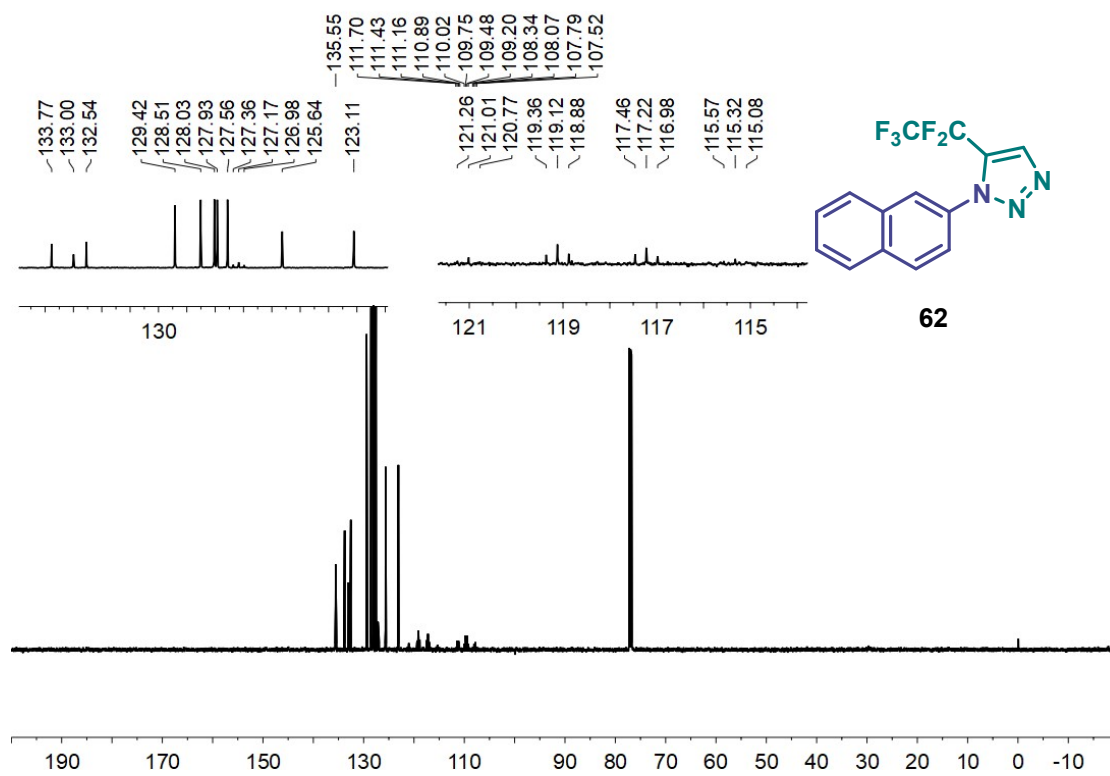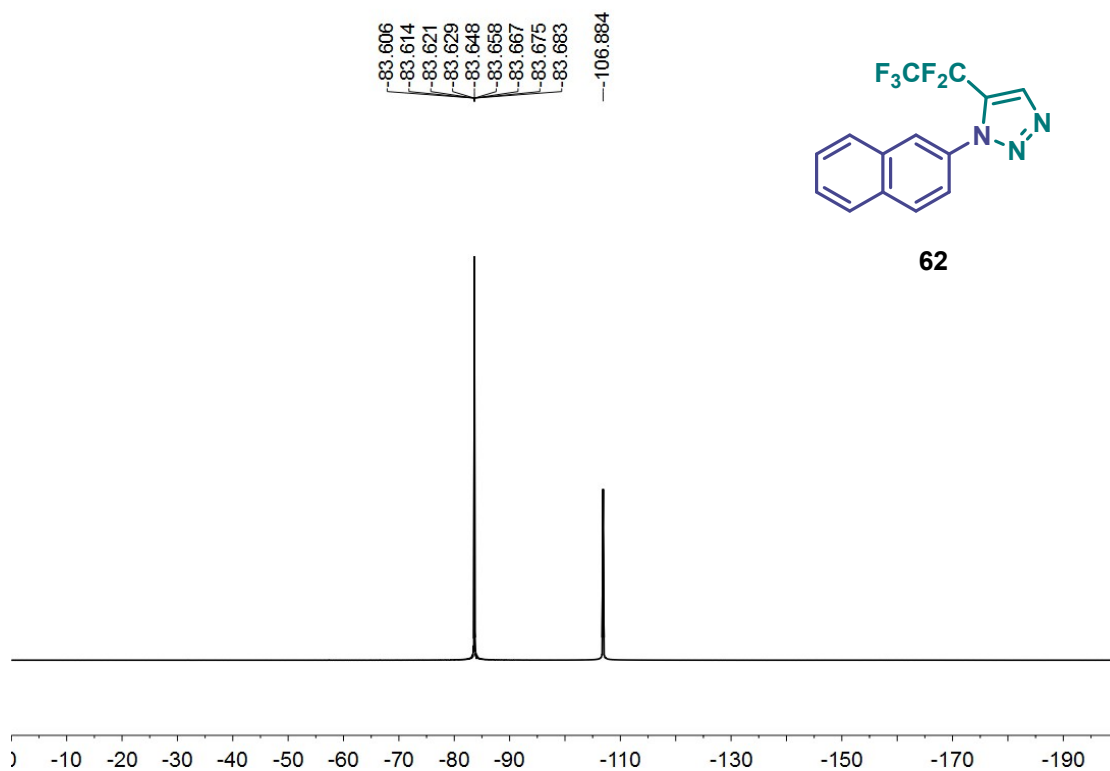

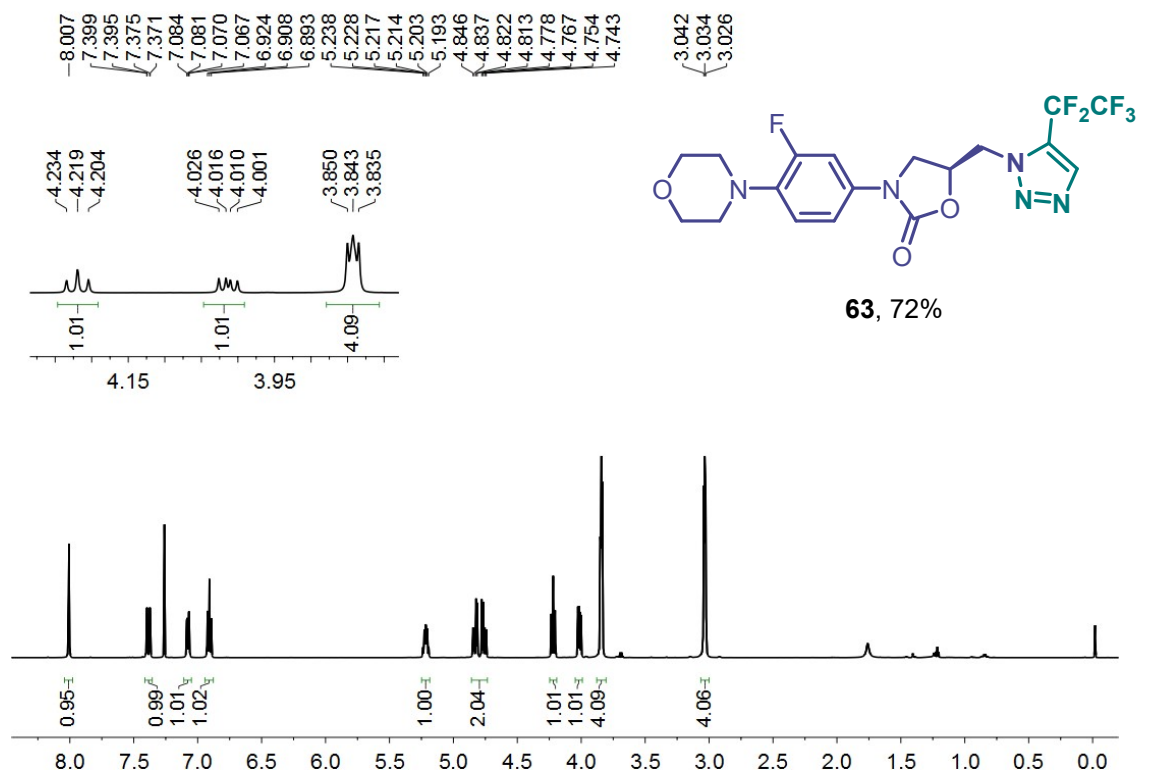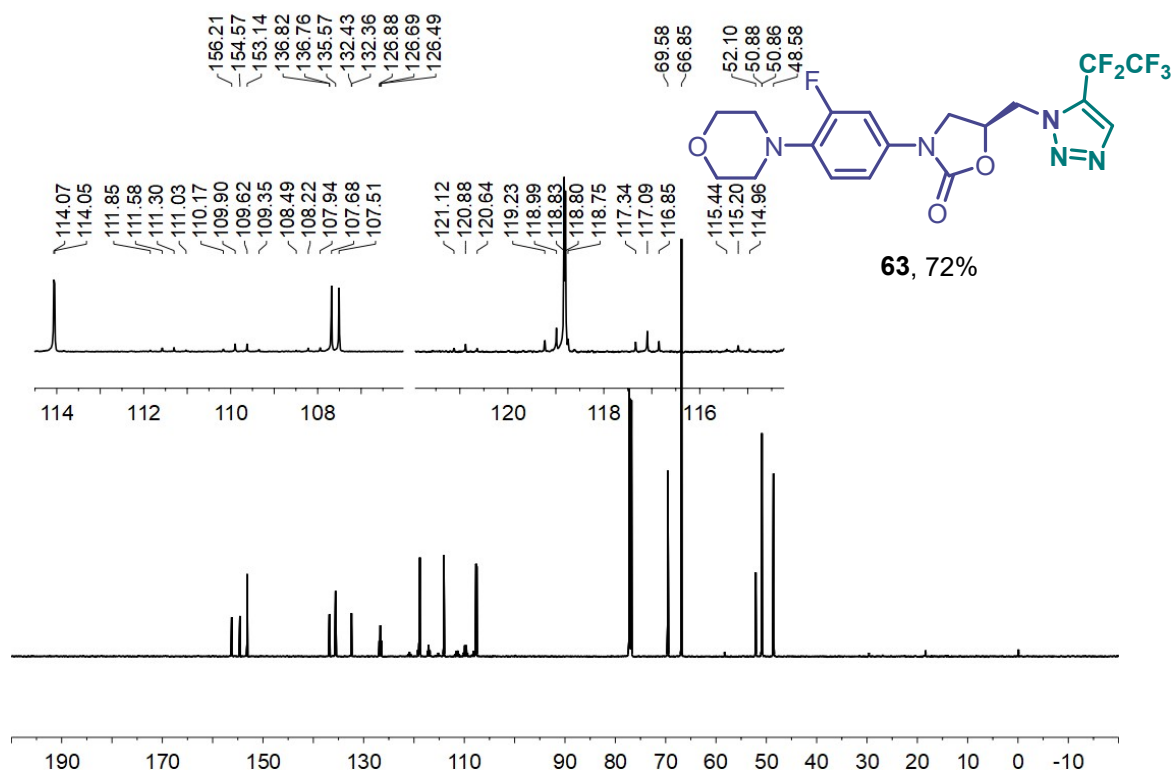

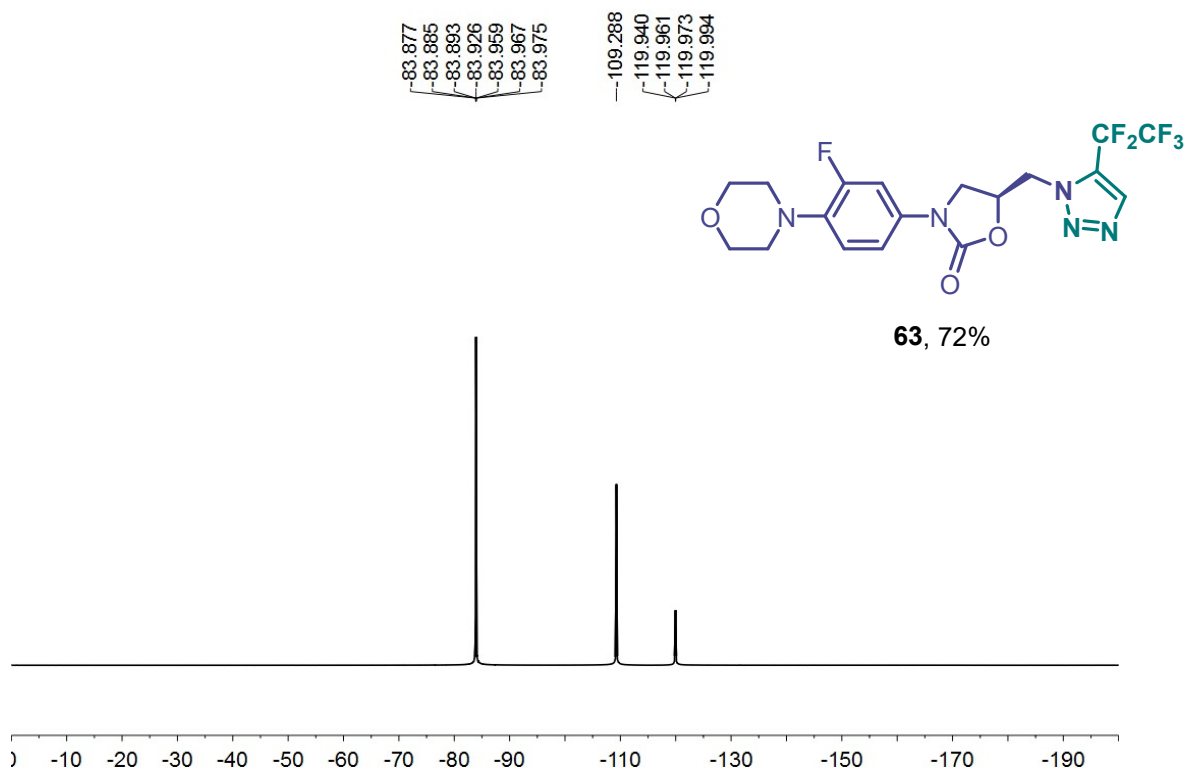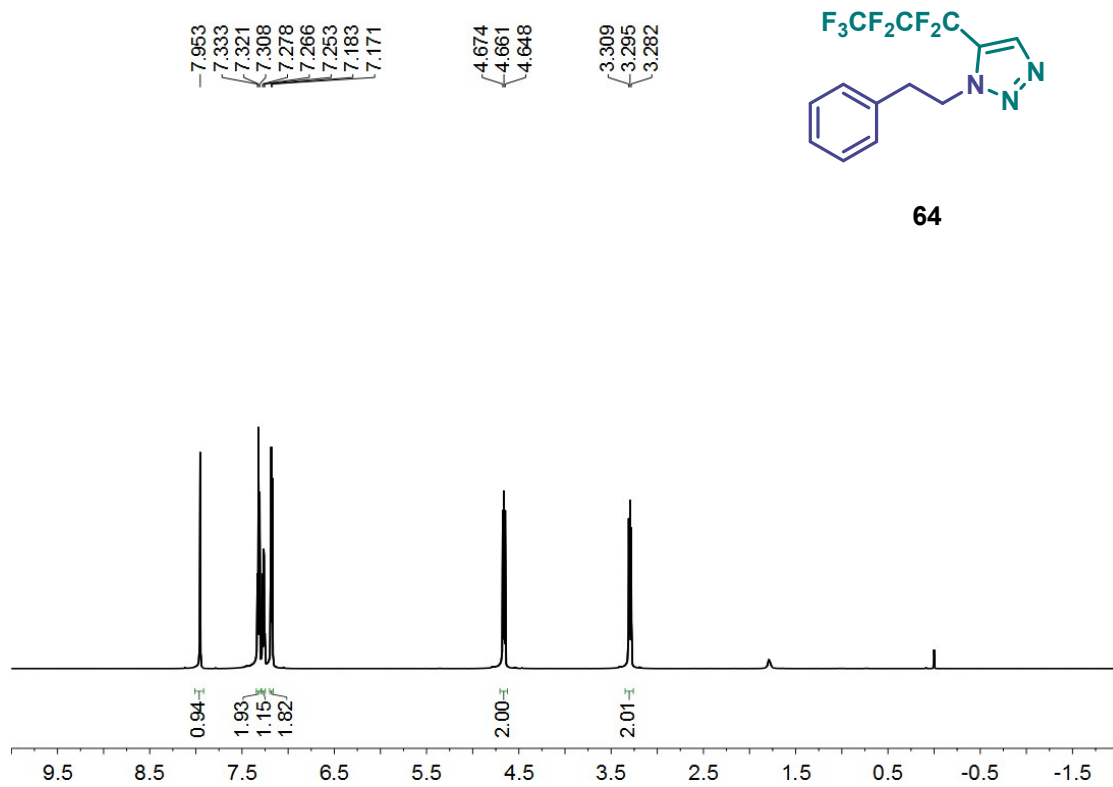



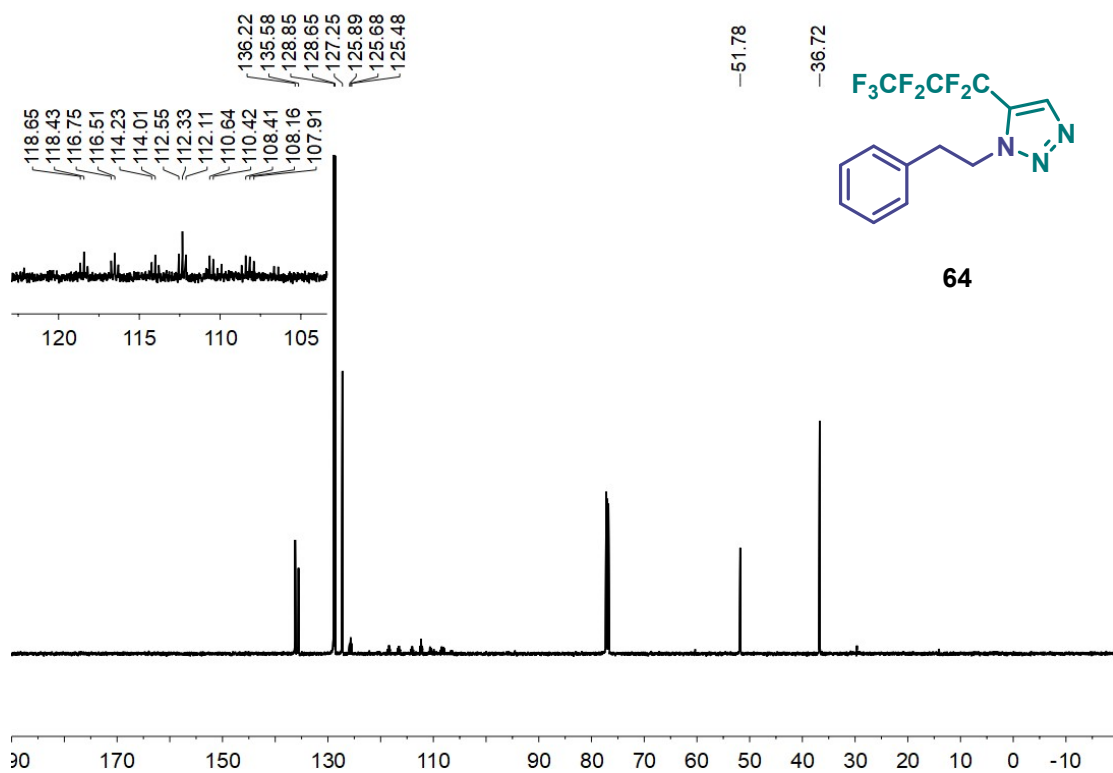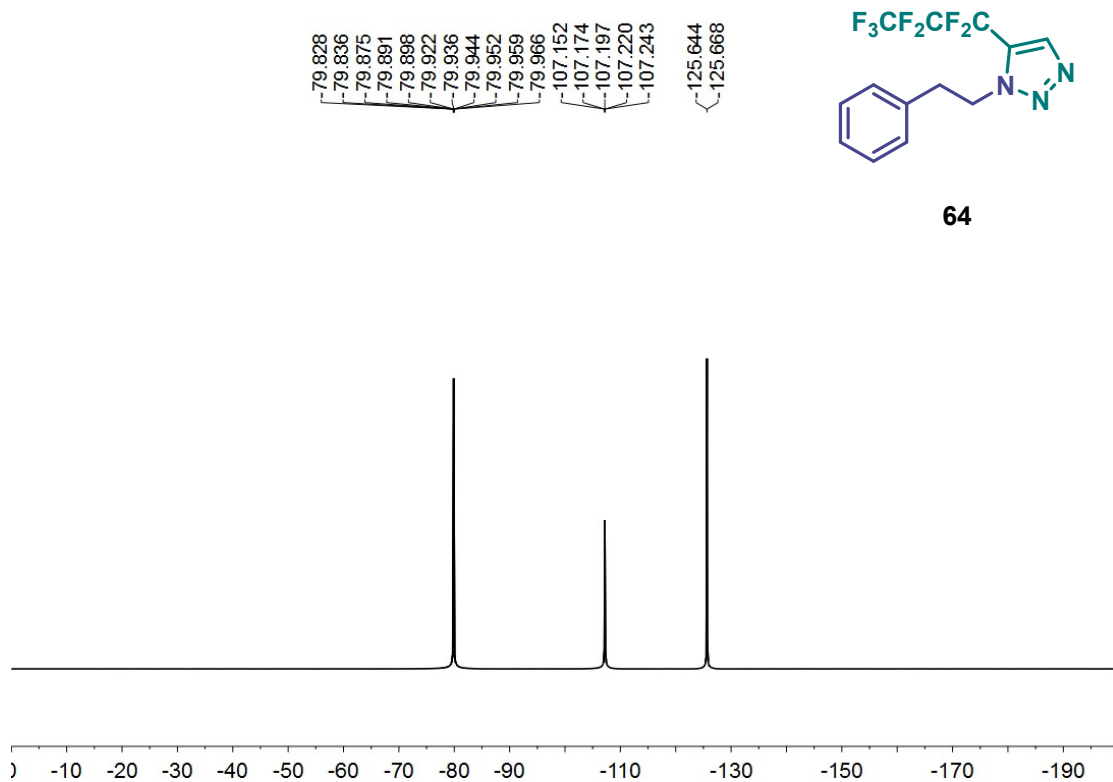

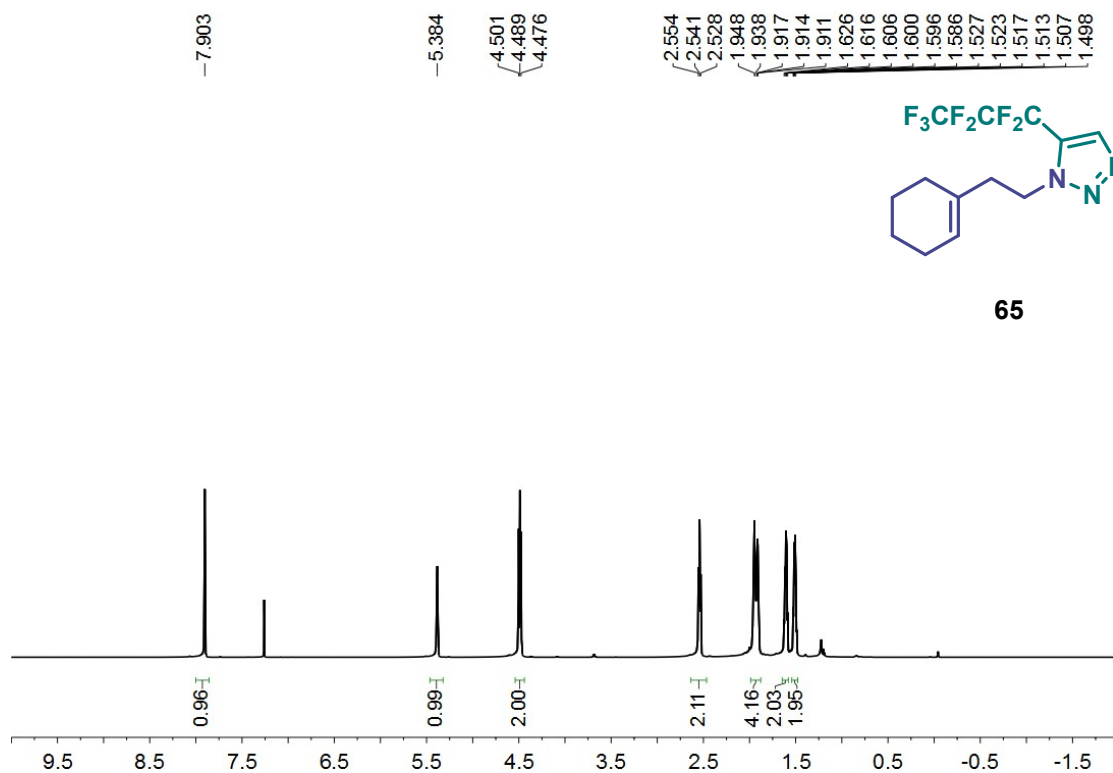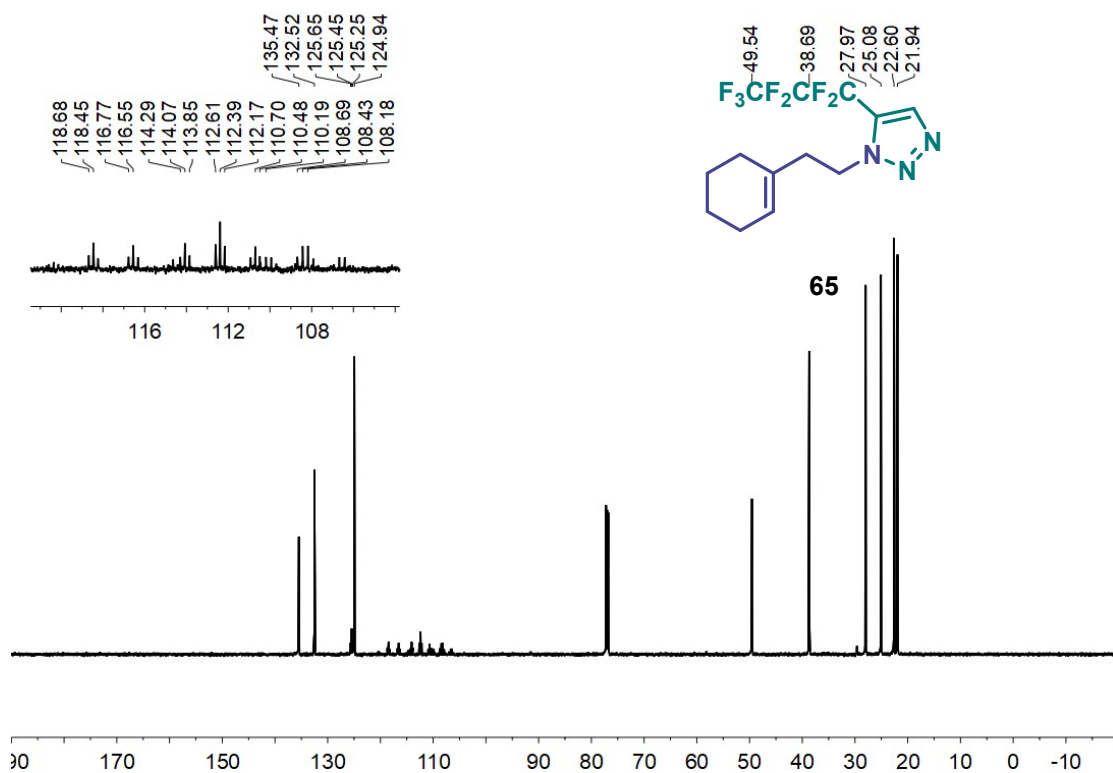

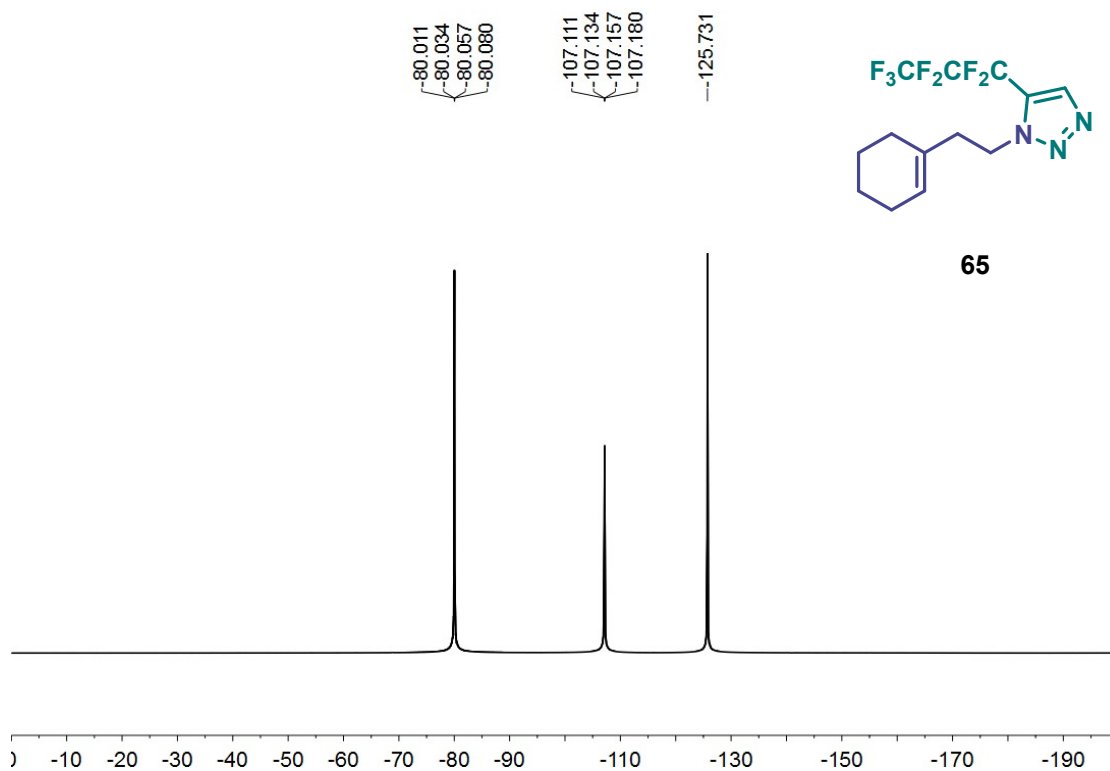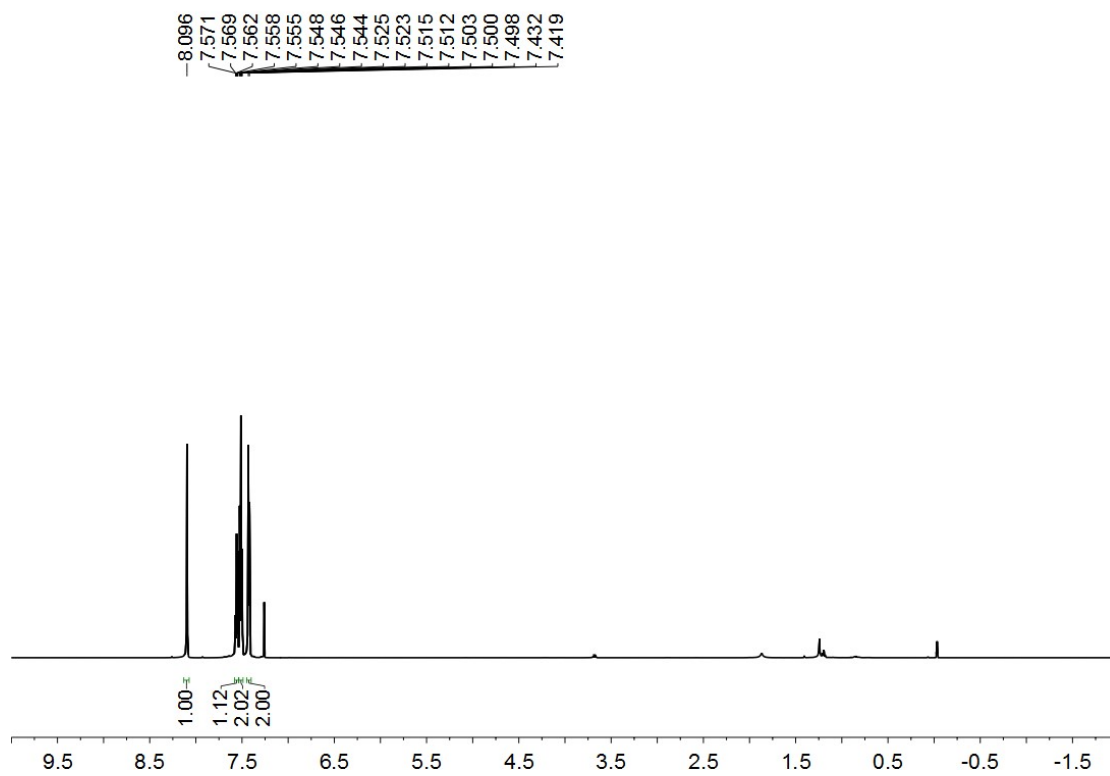

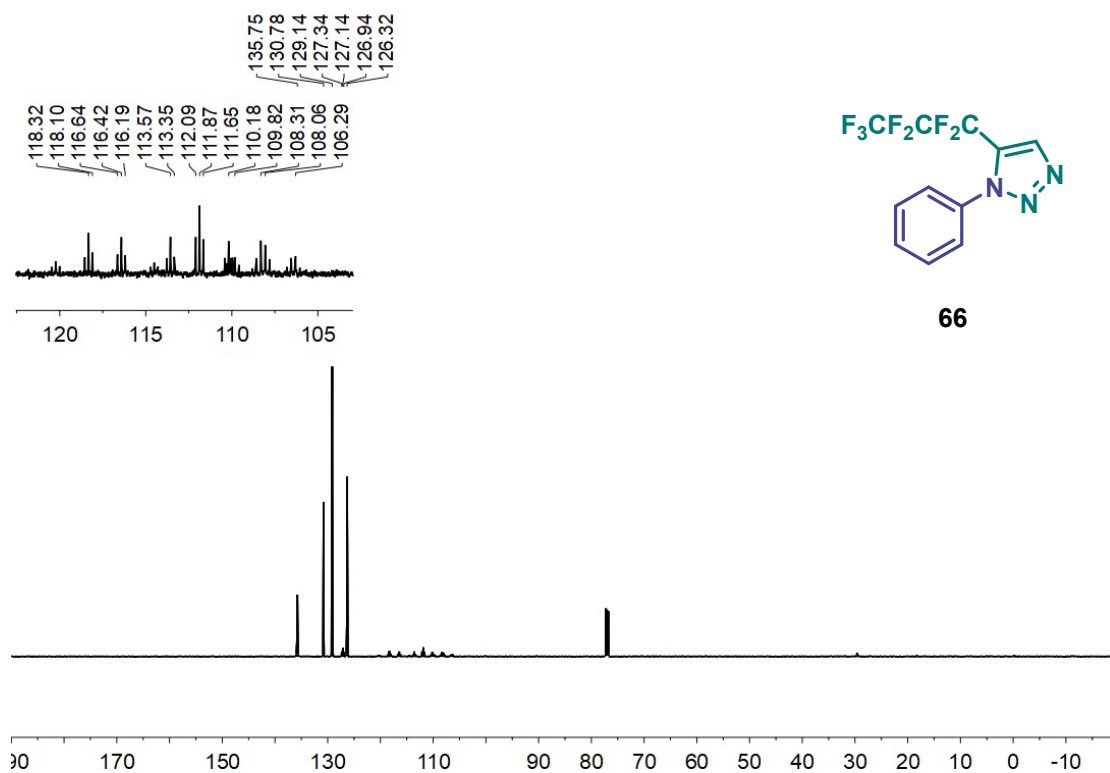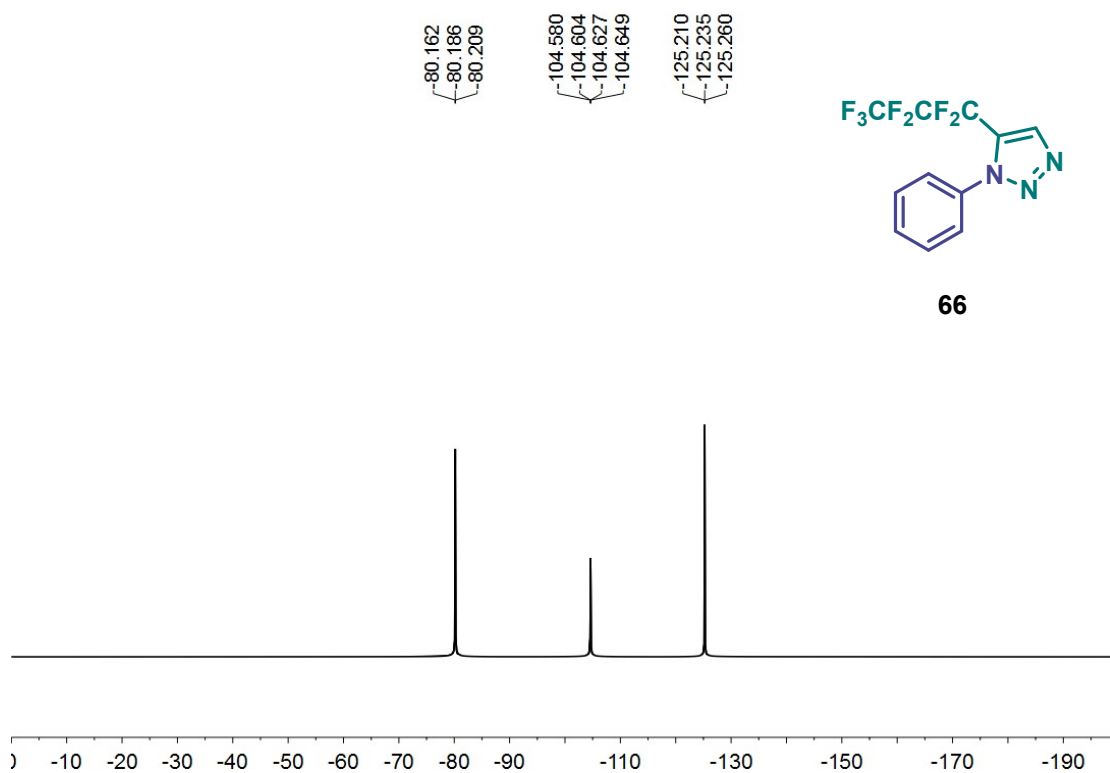

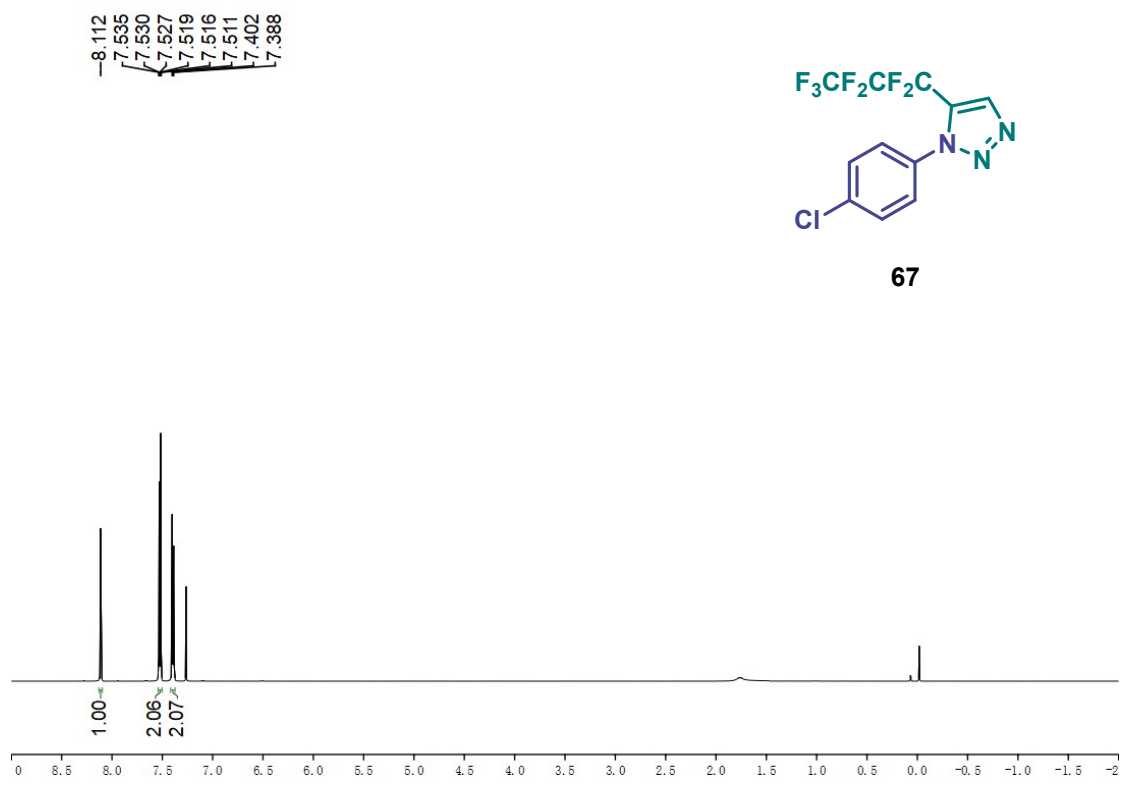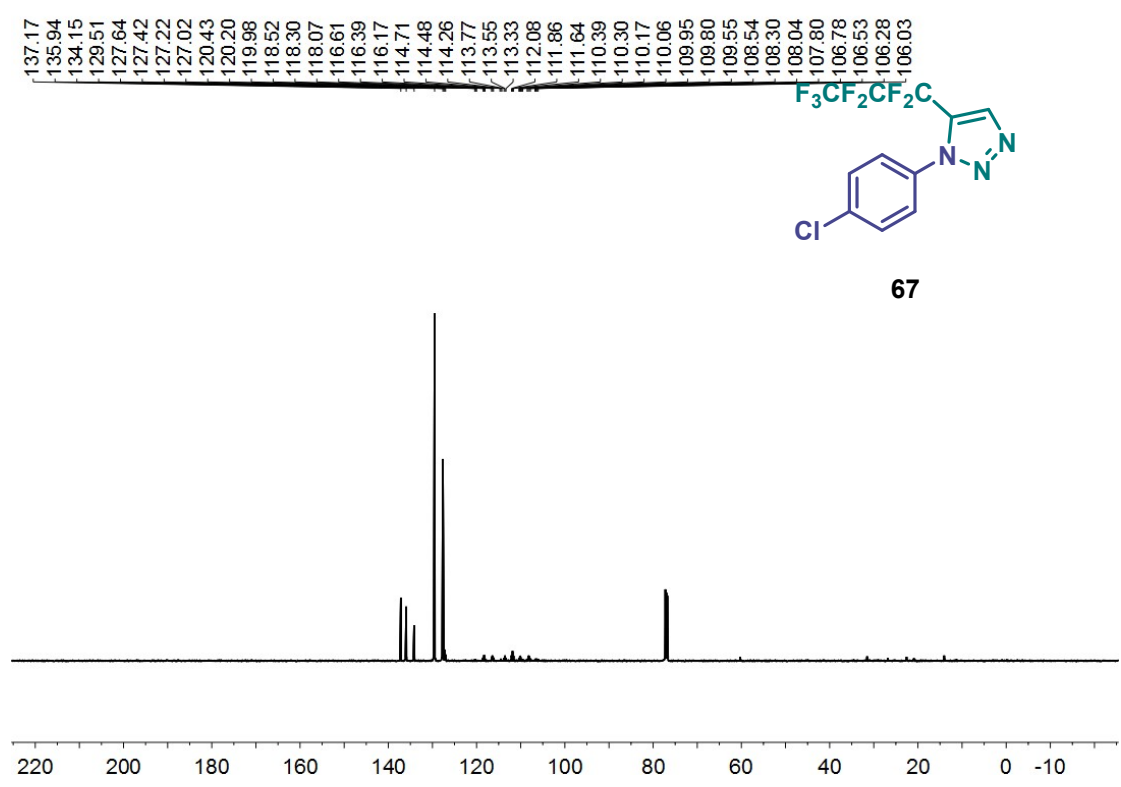

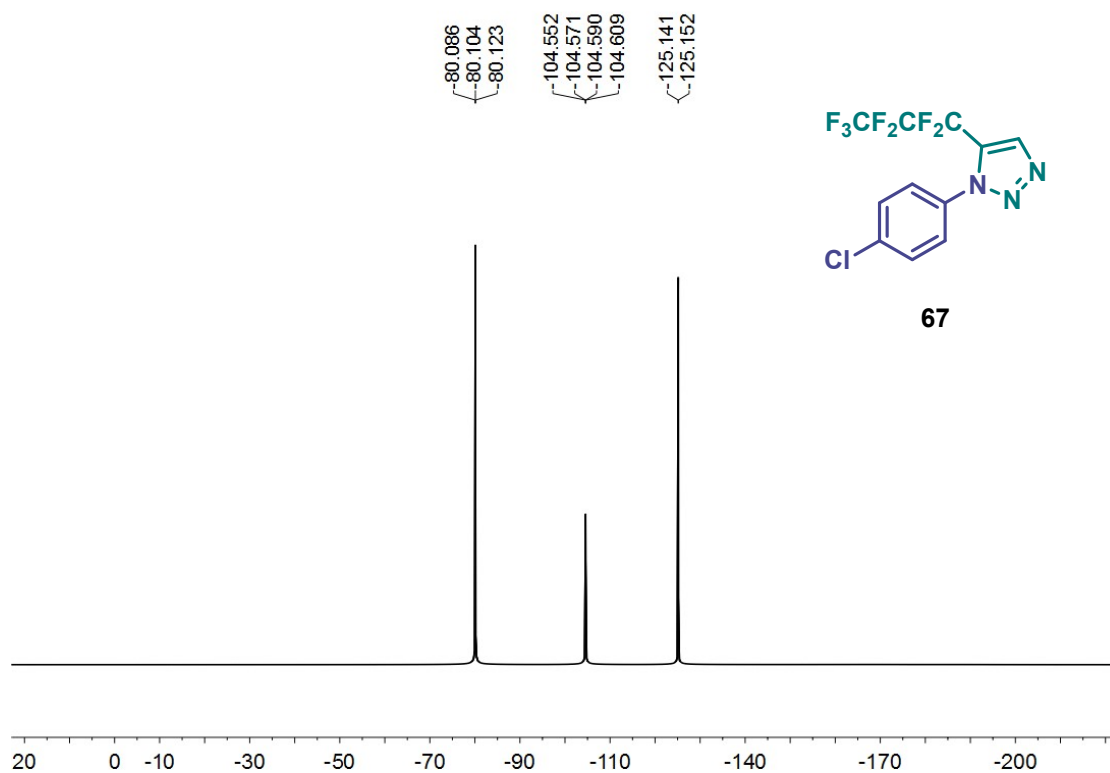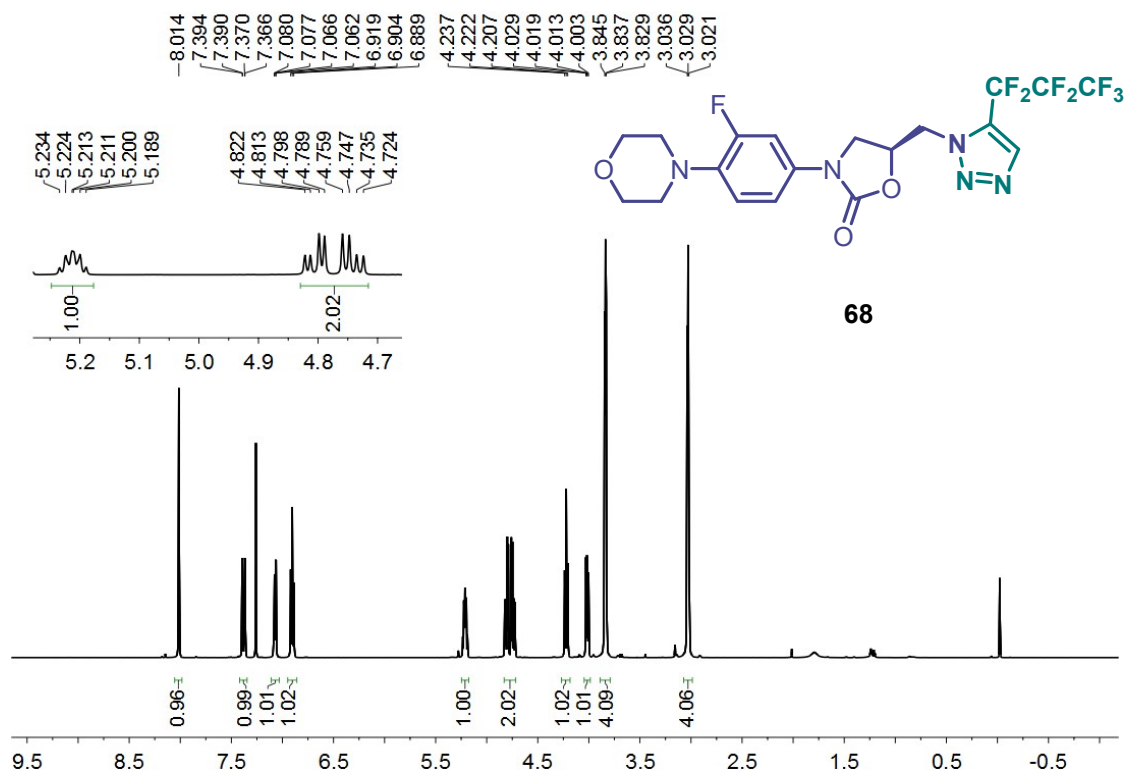

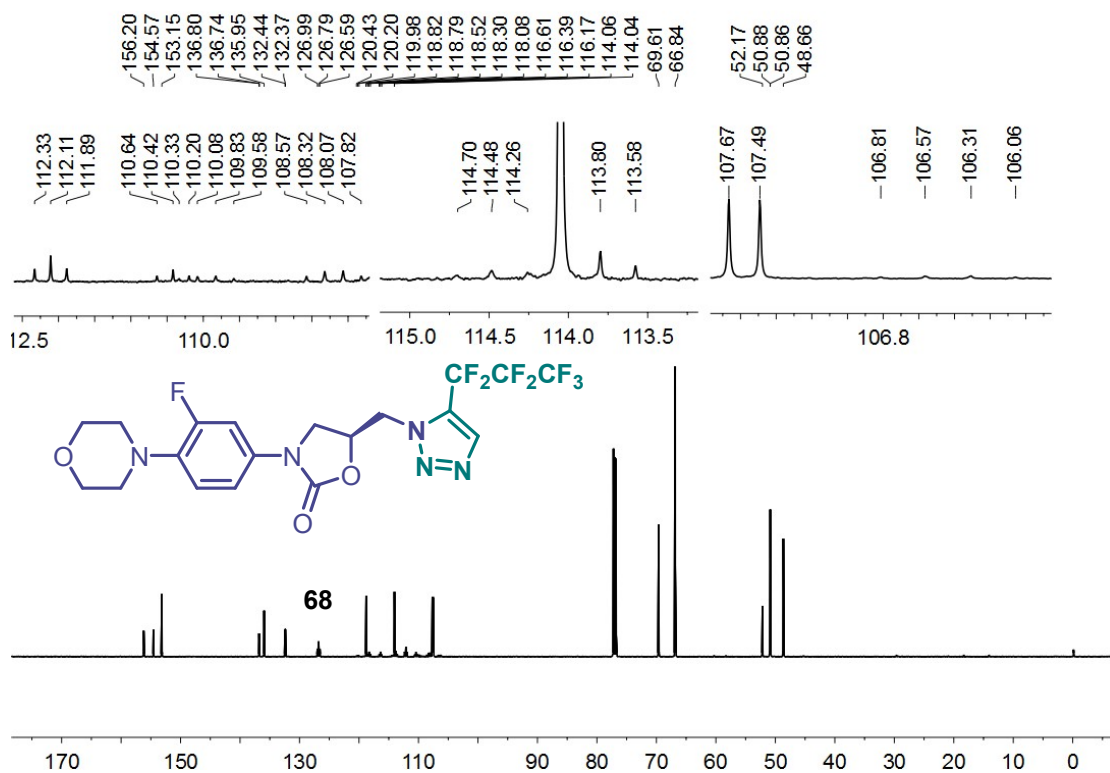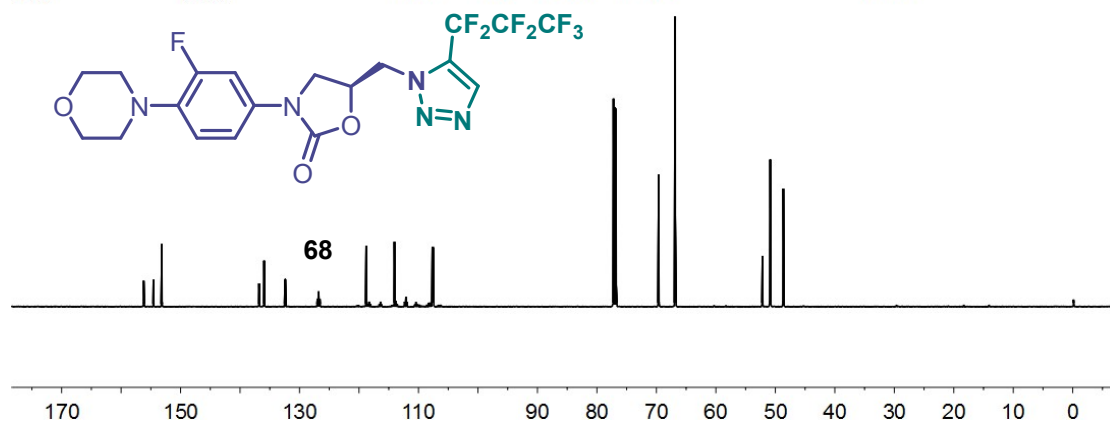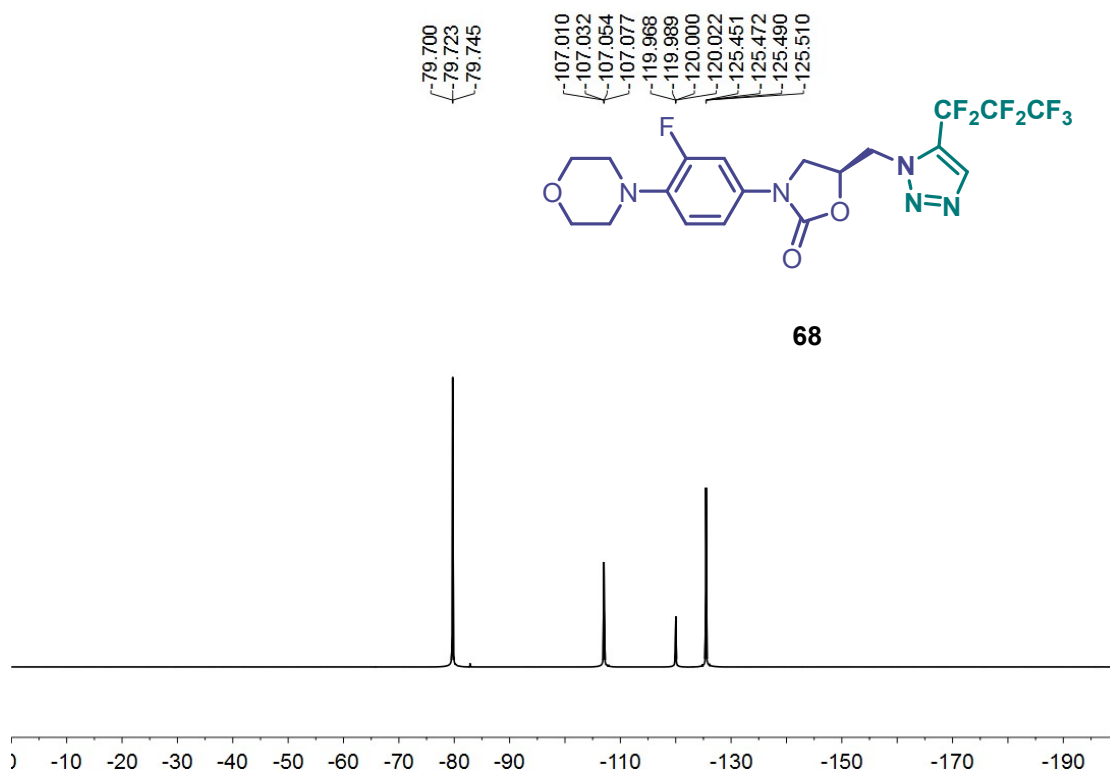

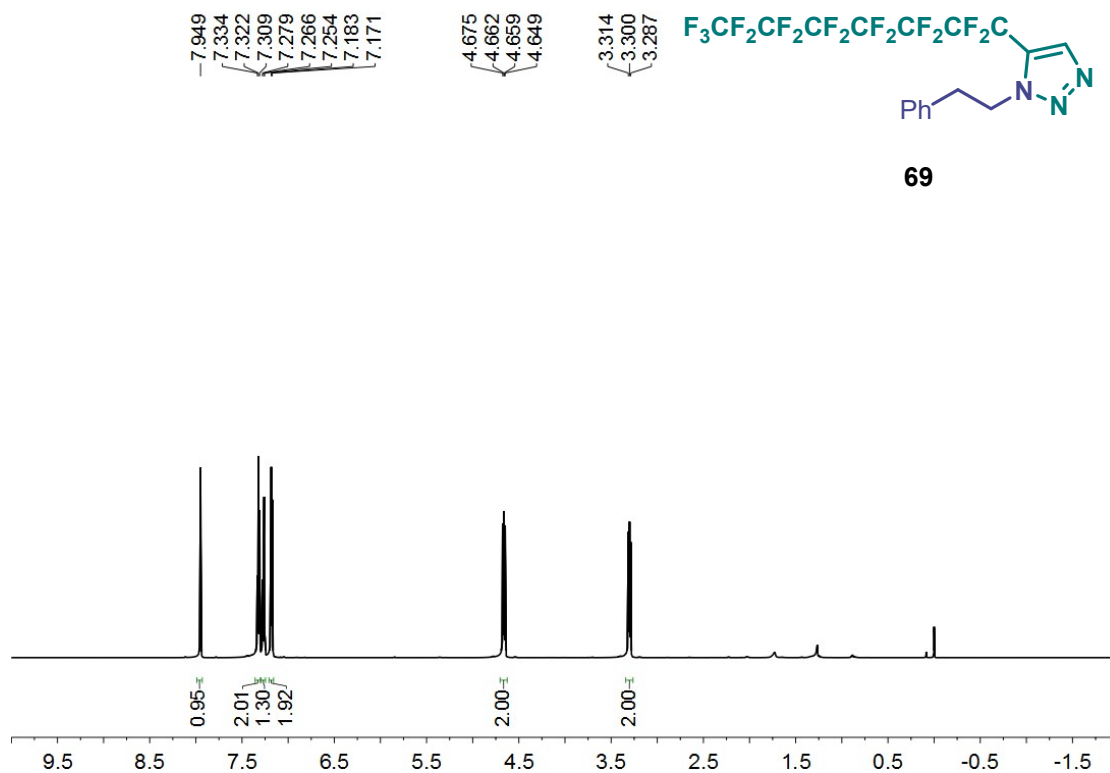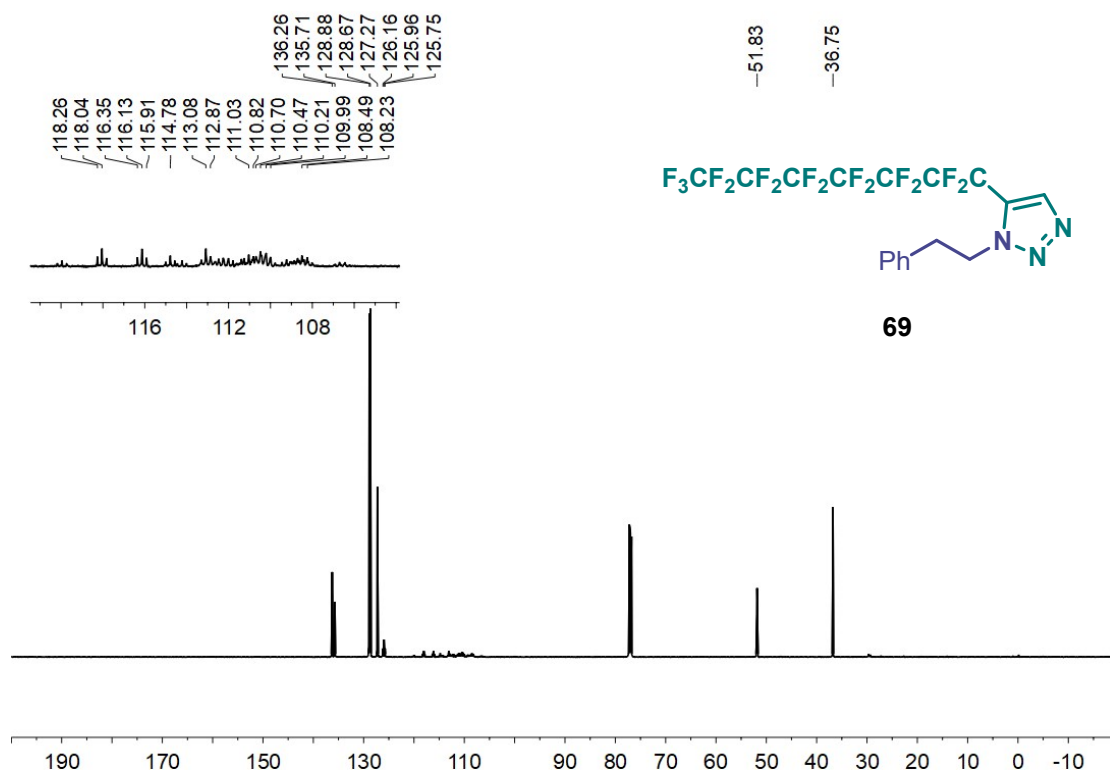



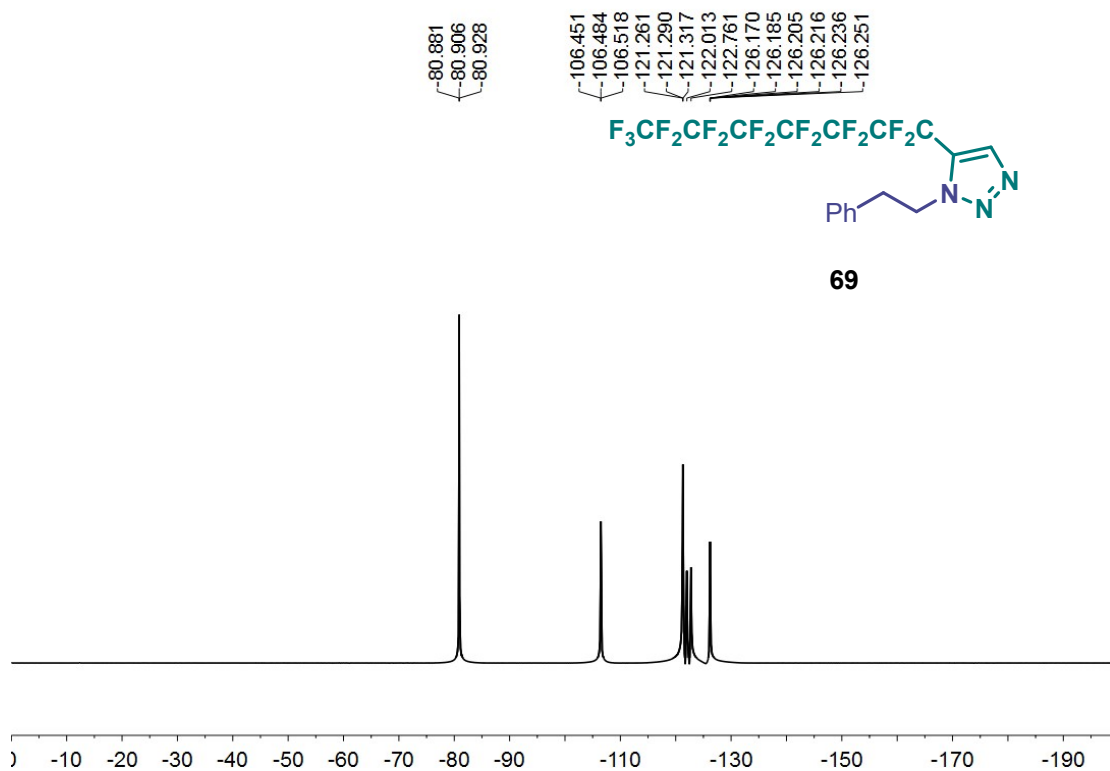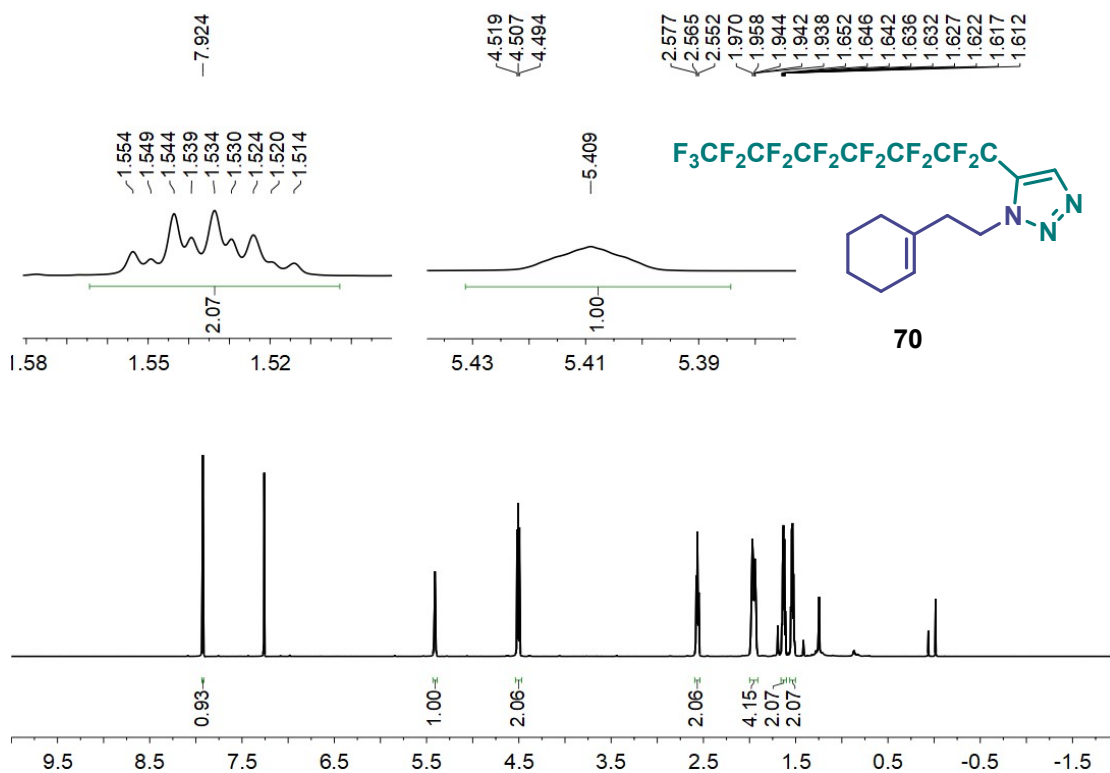

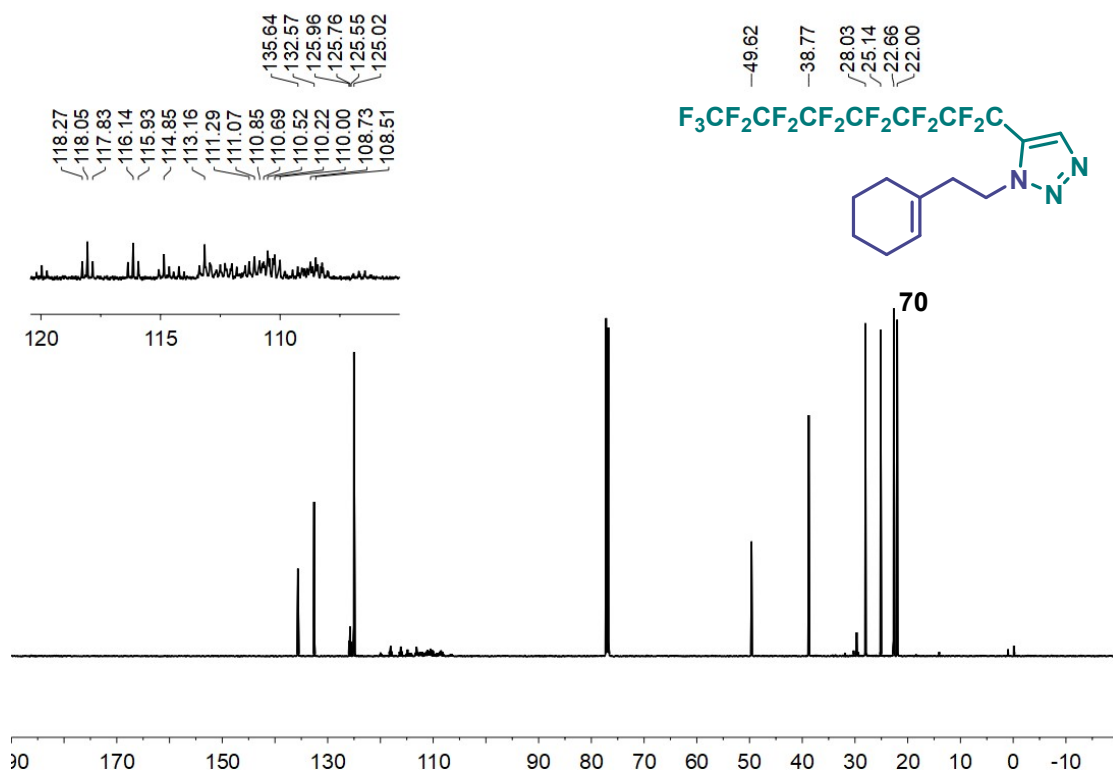

8.118  
7.614  
7.601  
7.598  
7.589  
7.565  
7.552  
7.540  
7.454  
7.441

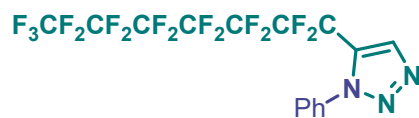

71

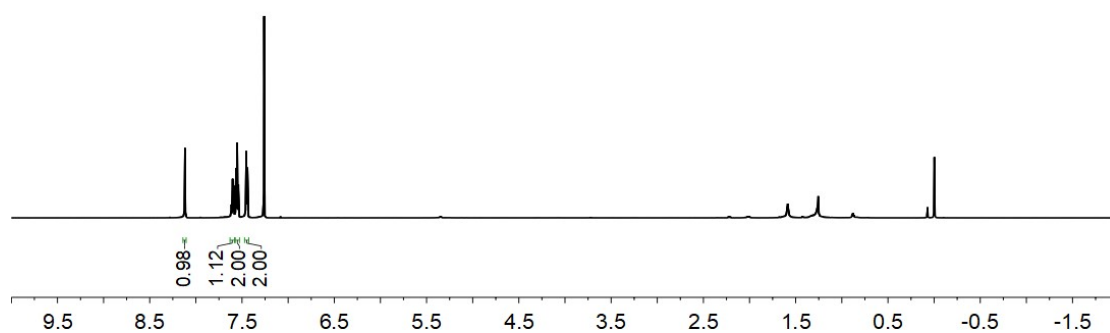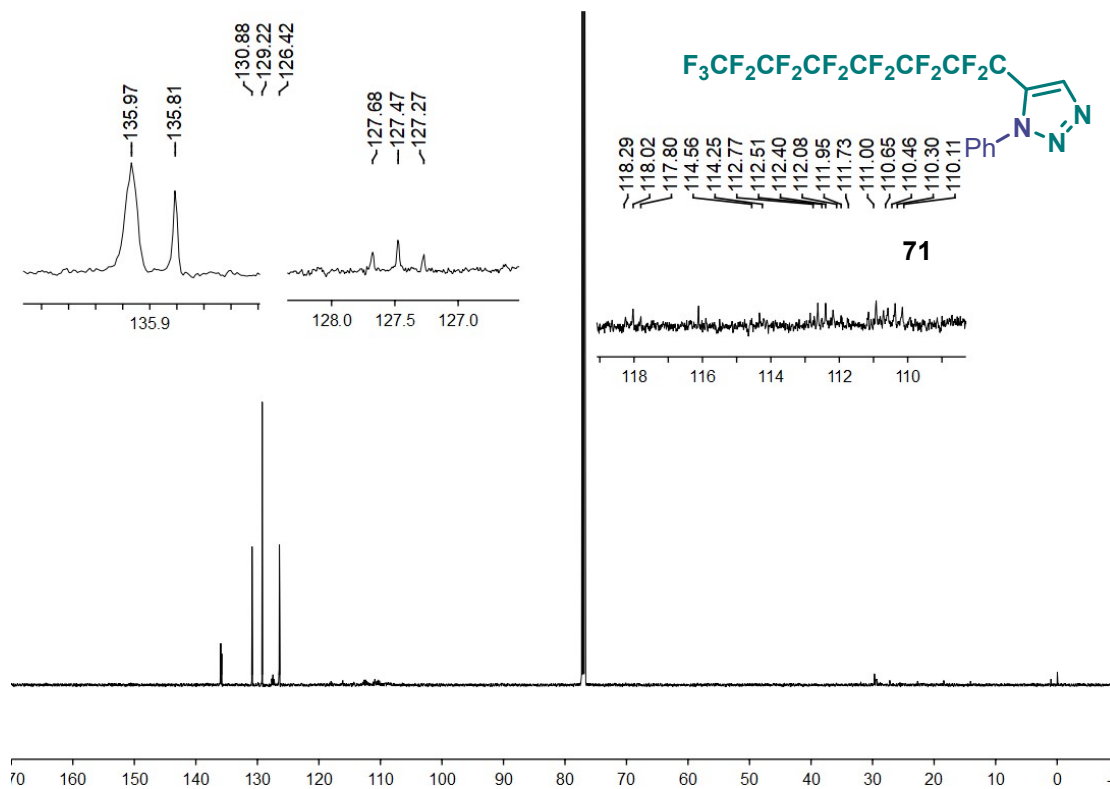

-80.750  
-80.774  
-80.799

-103.708  
-103.742  
-103.776

-120.693  
-120.715  
-120.747  
-121.350  
-121.370  
-121.380  
-121.989  
-122.729  
-126.098  
-126.112  
-126.131  
-126.143  
-126.162  
-126.178

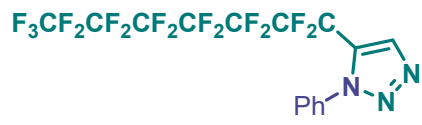

71

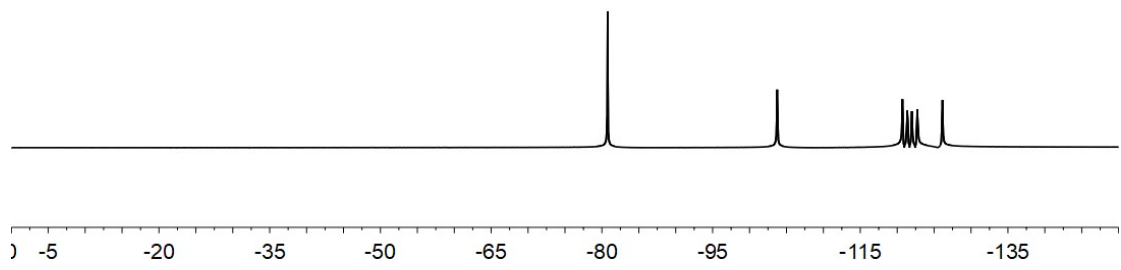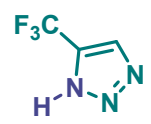

72

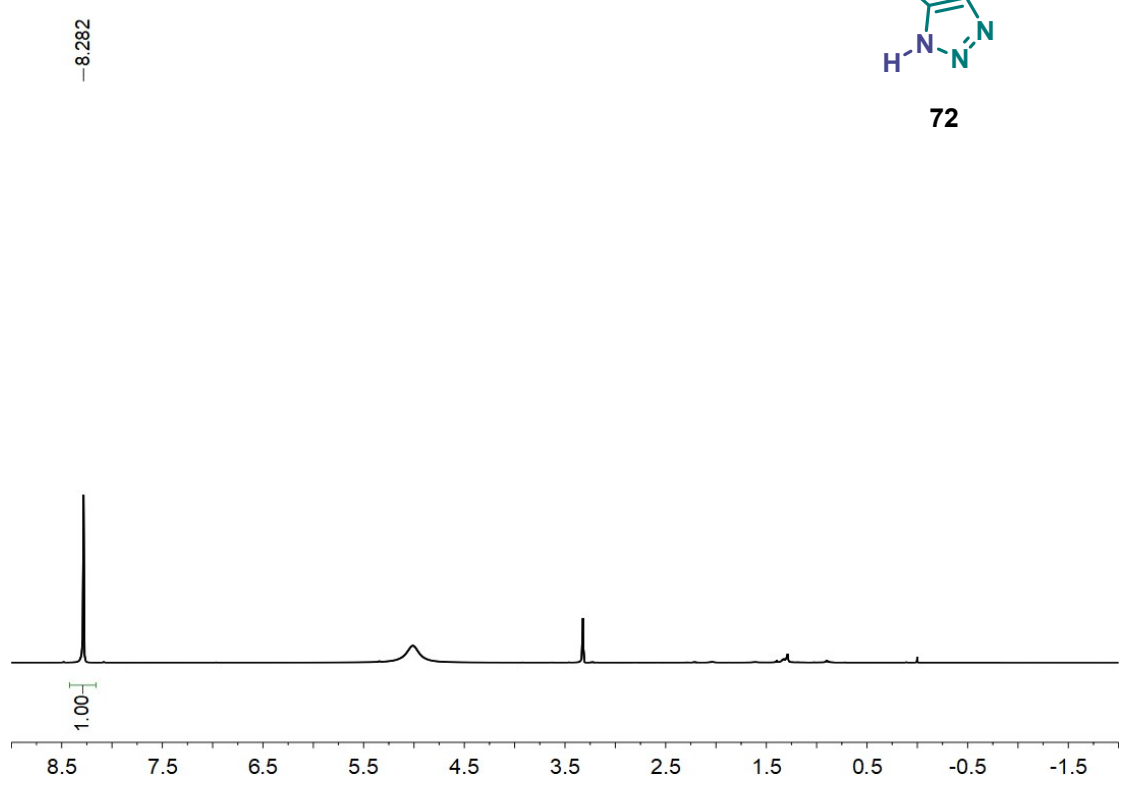

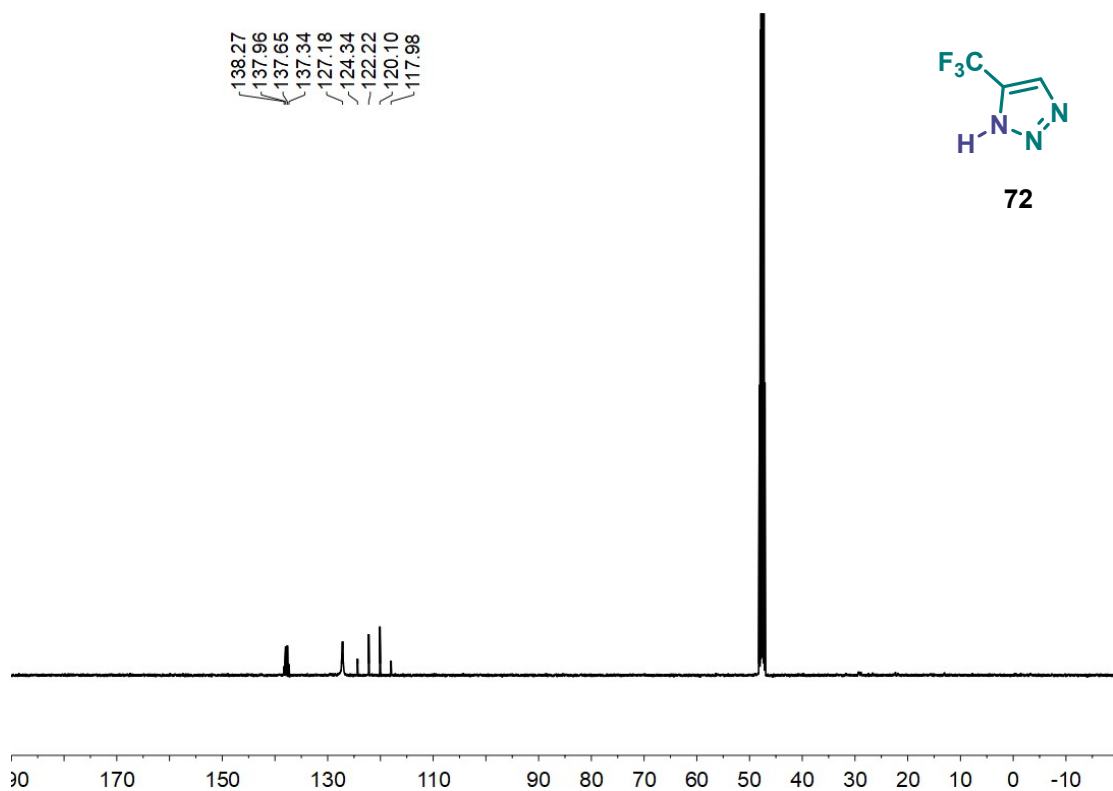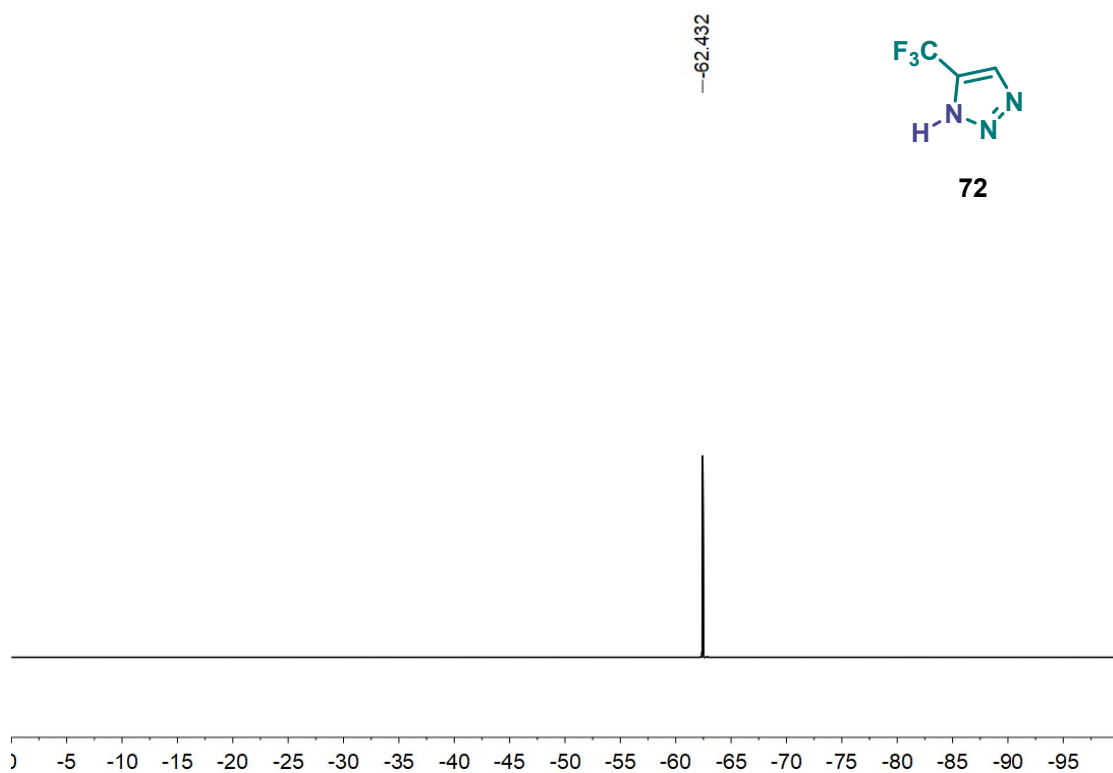

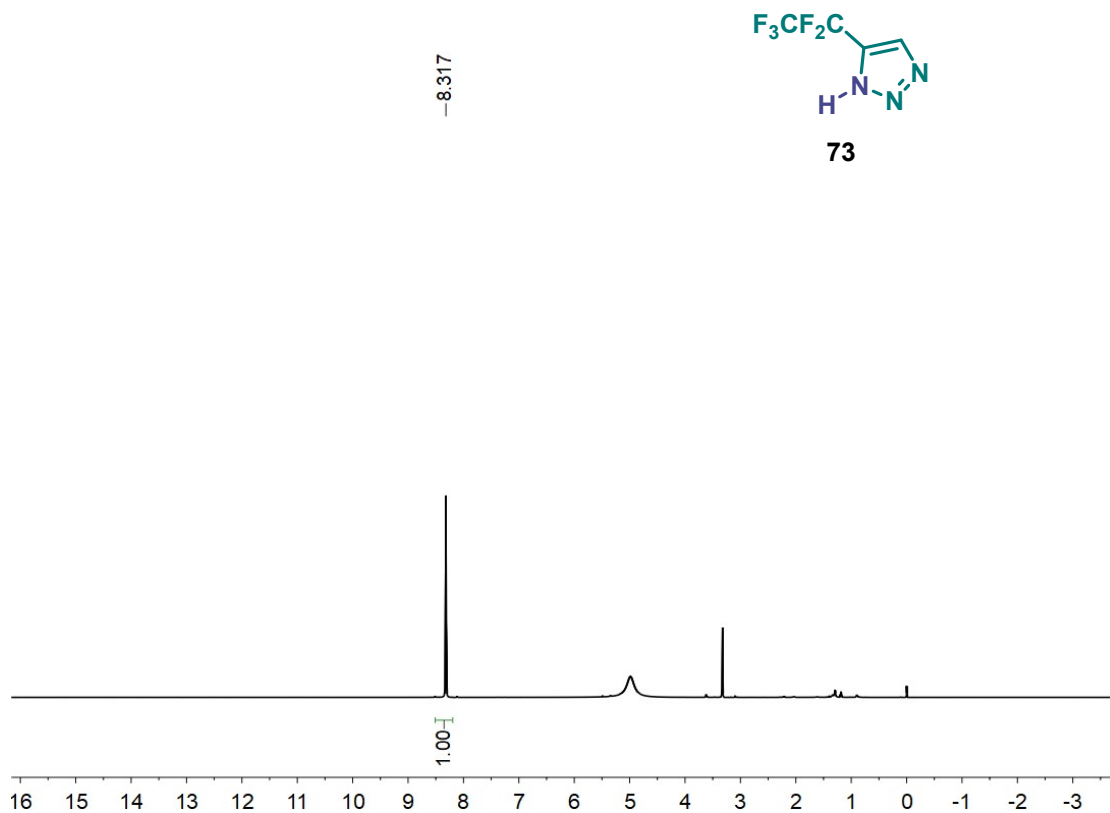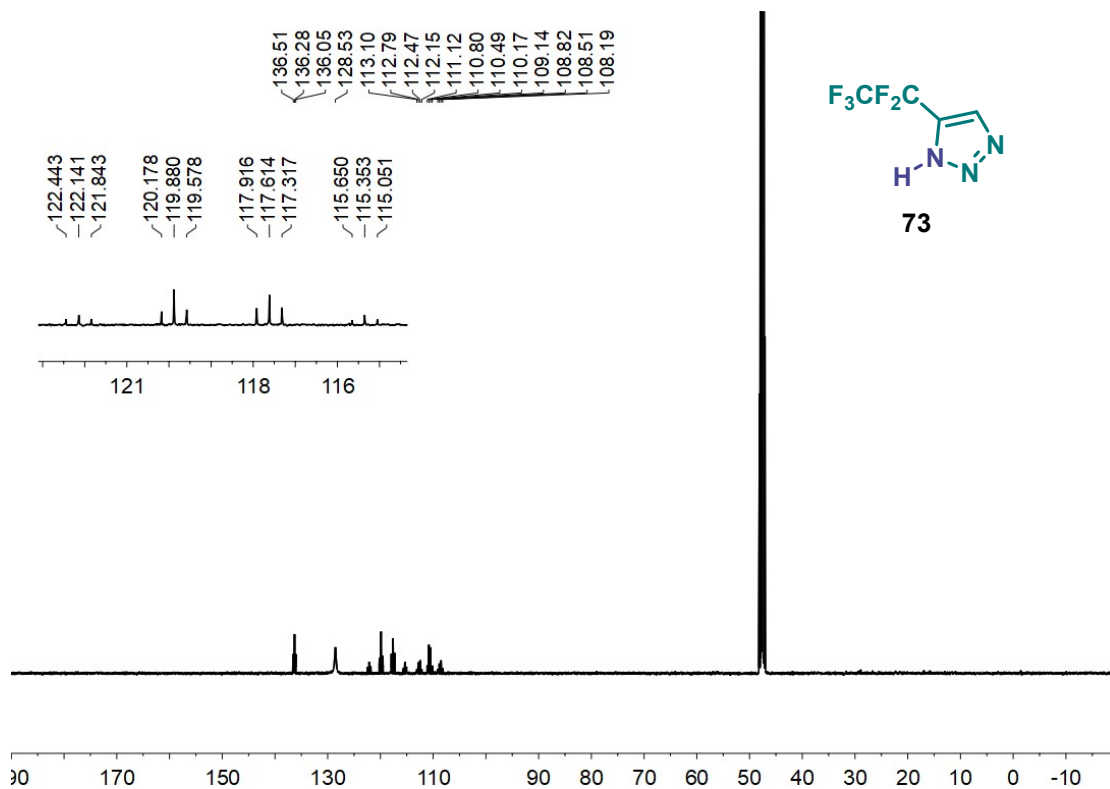

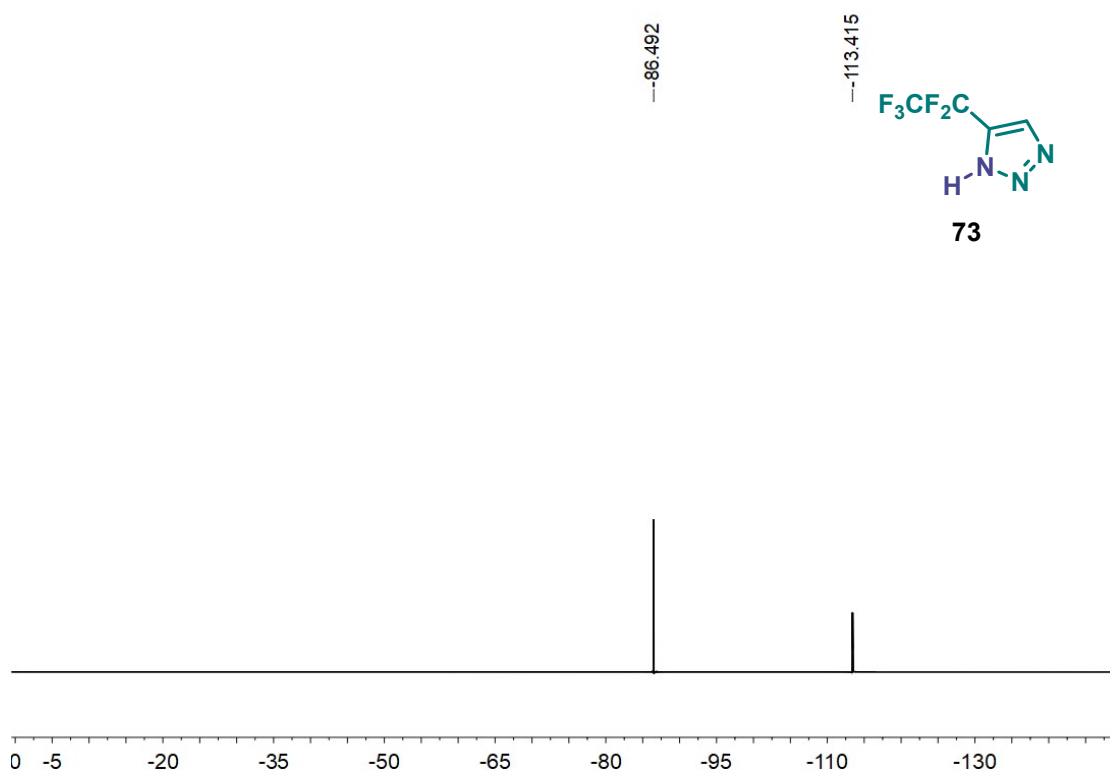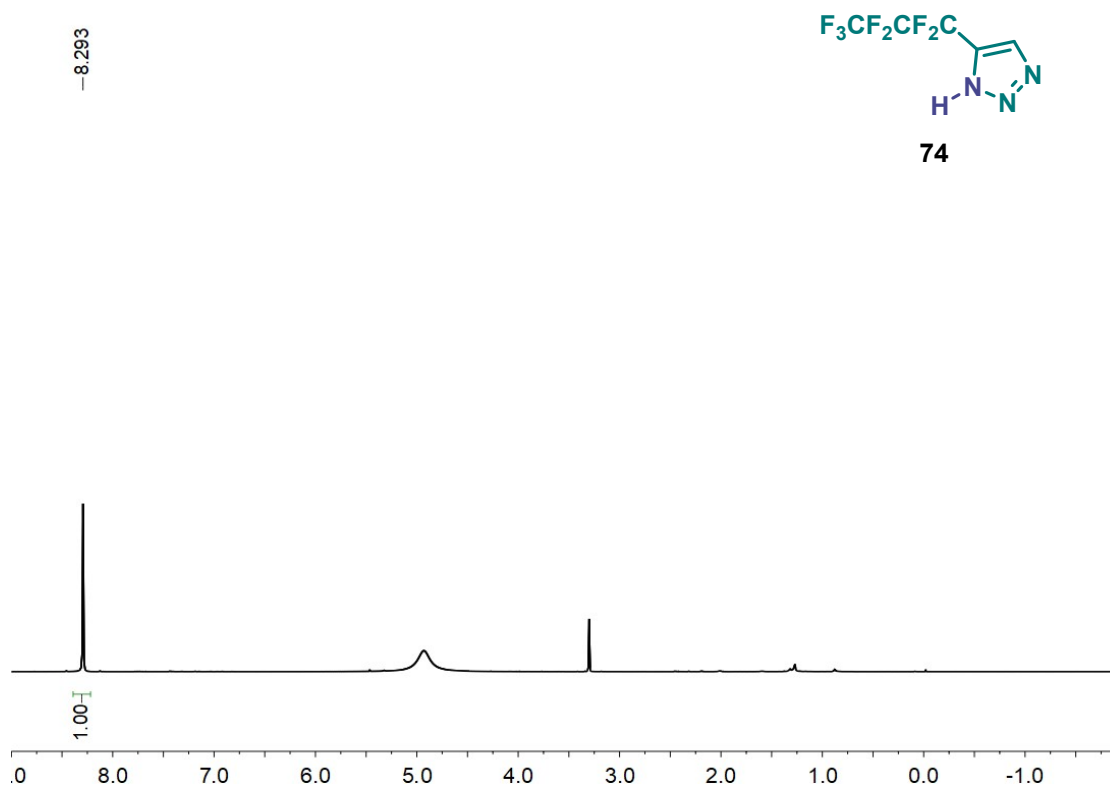

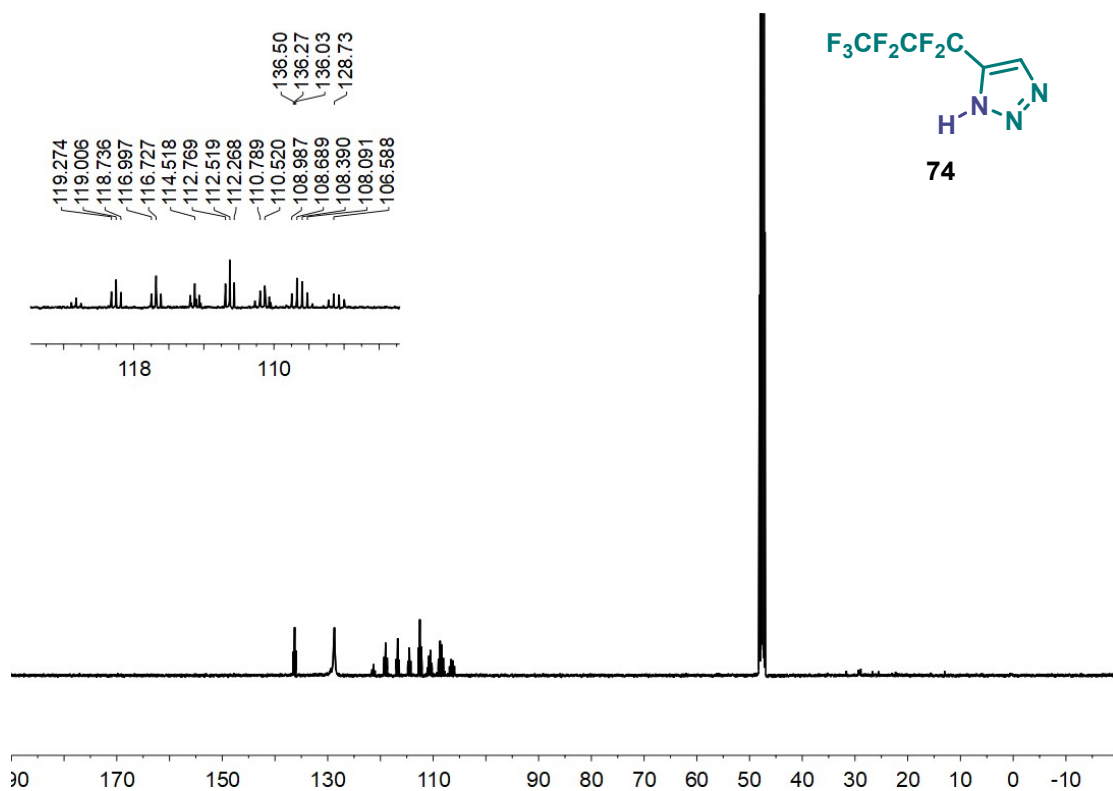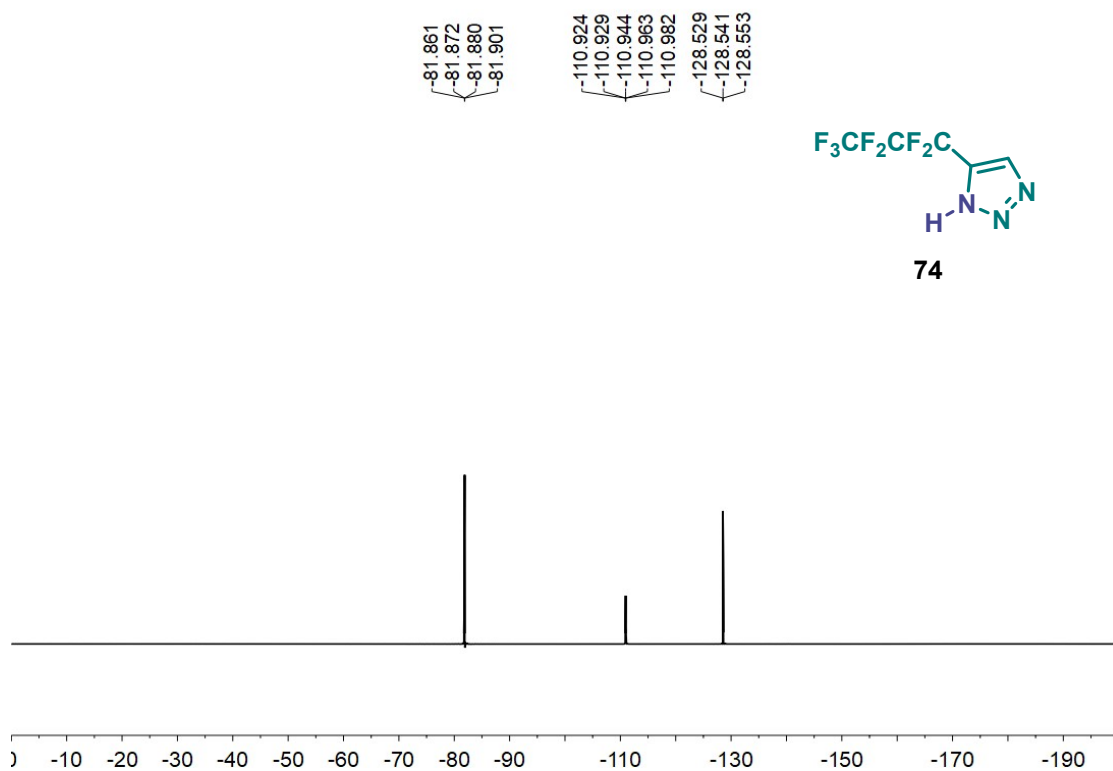



-8.306

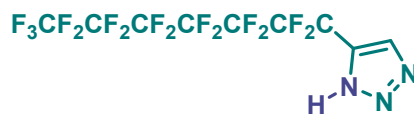

75

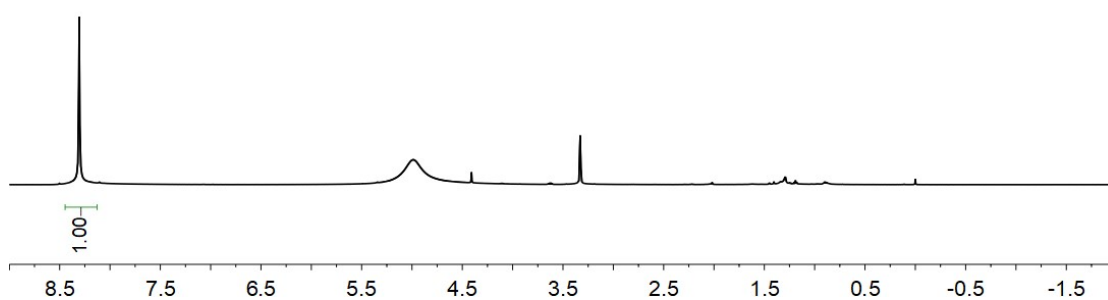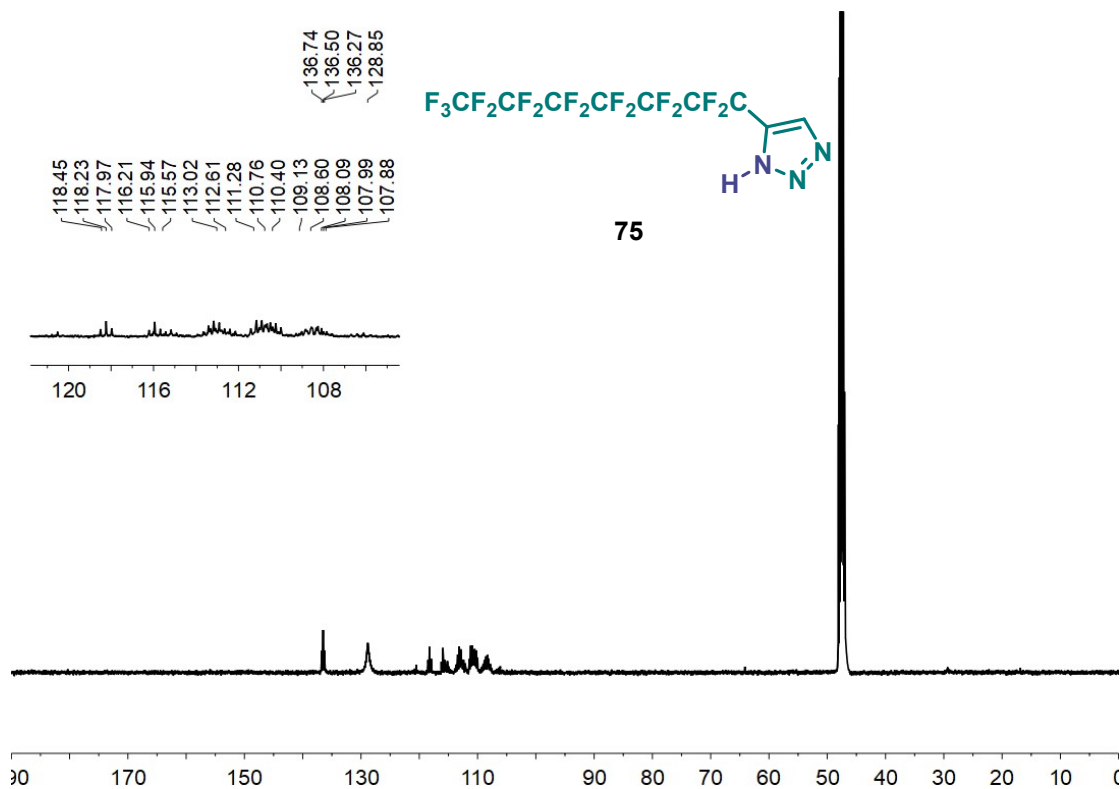

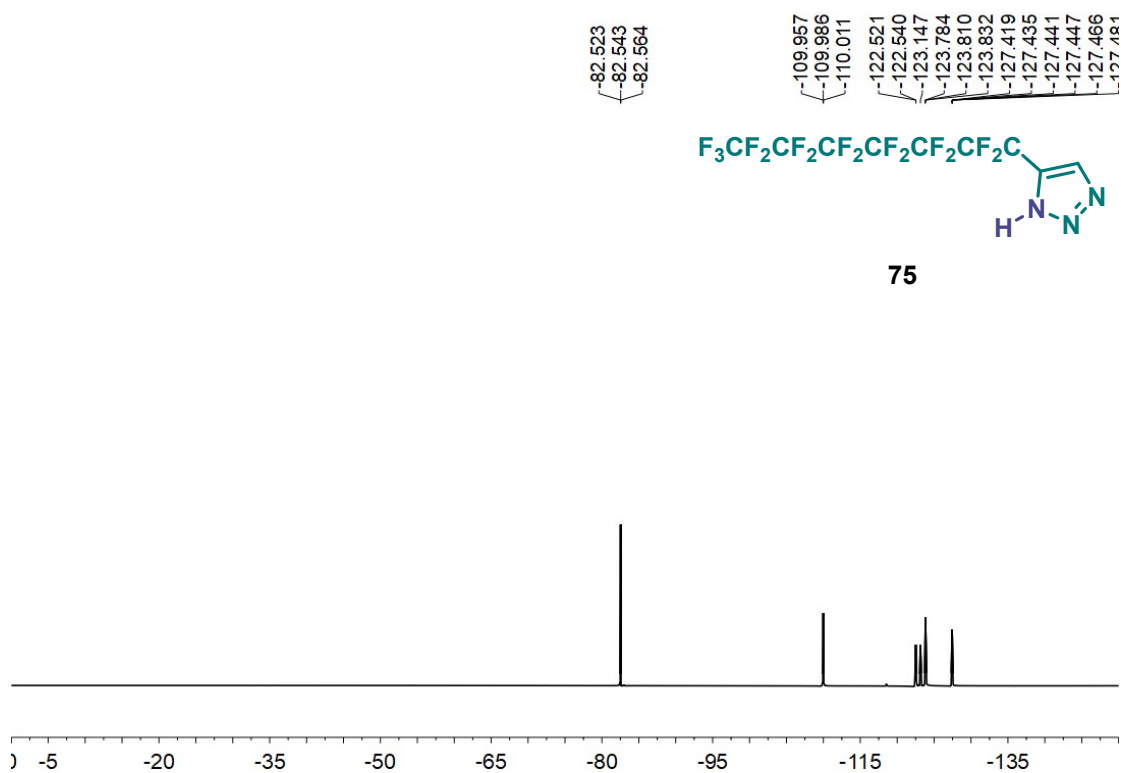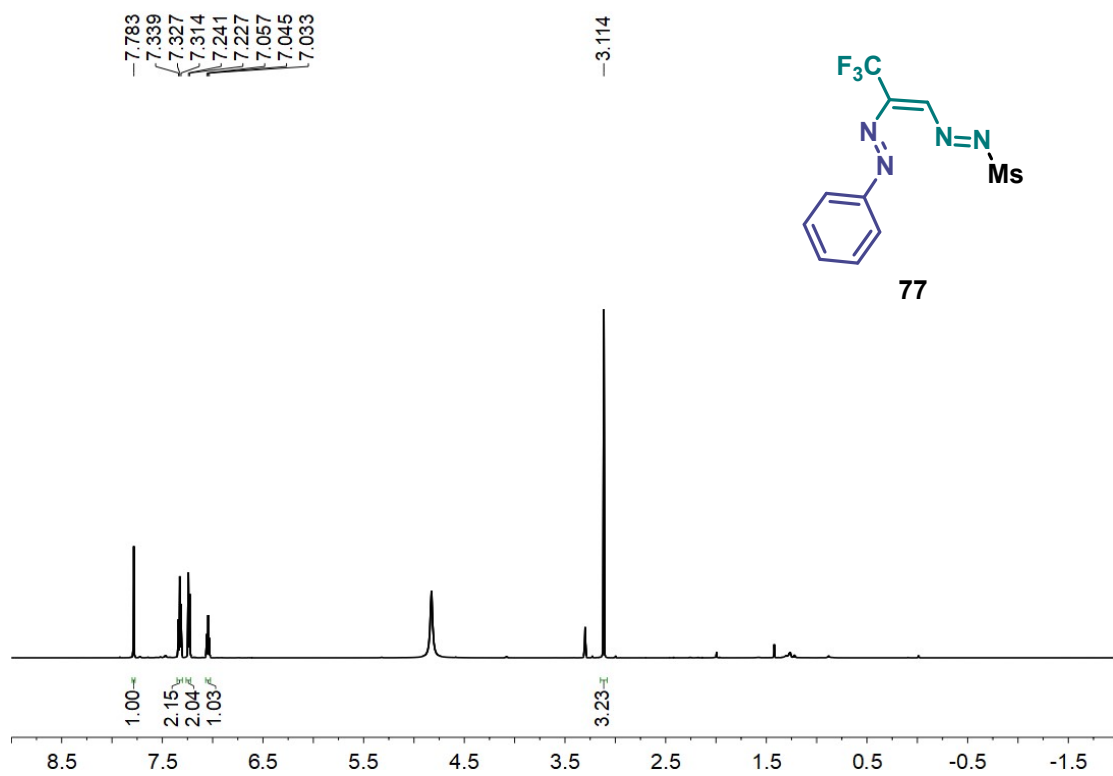

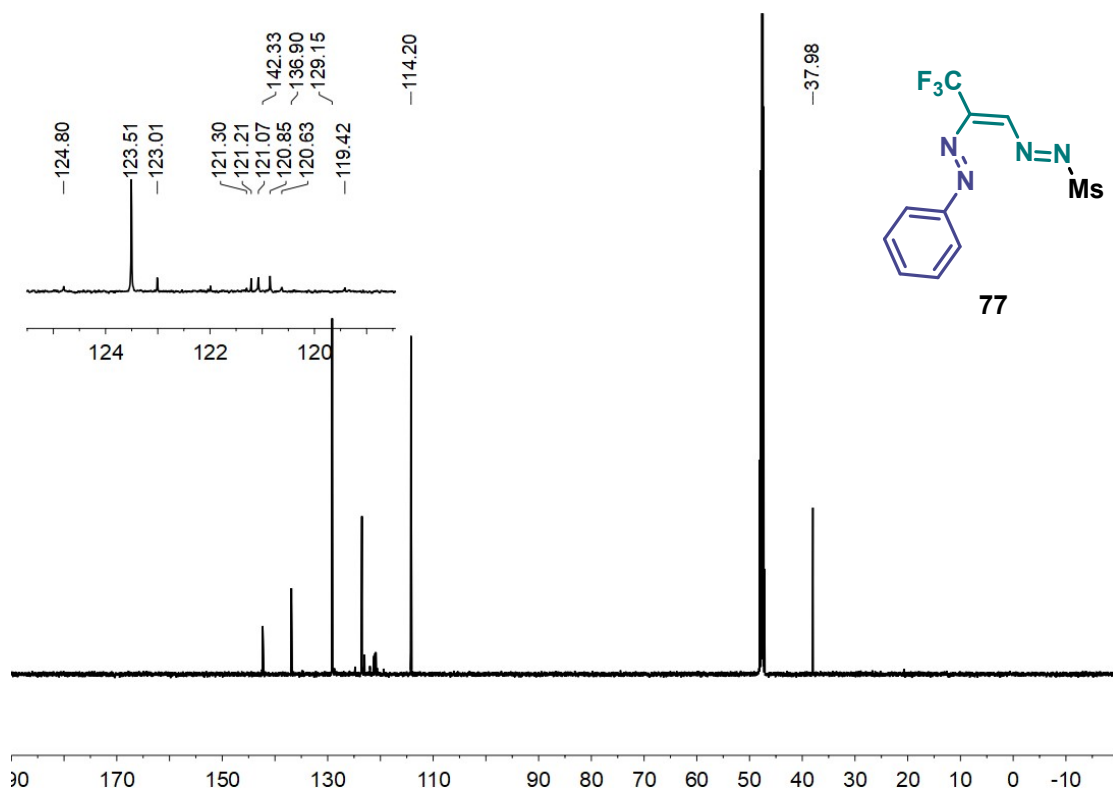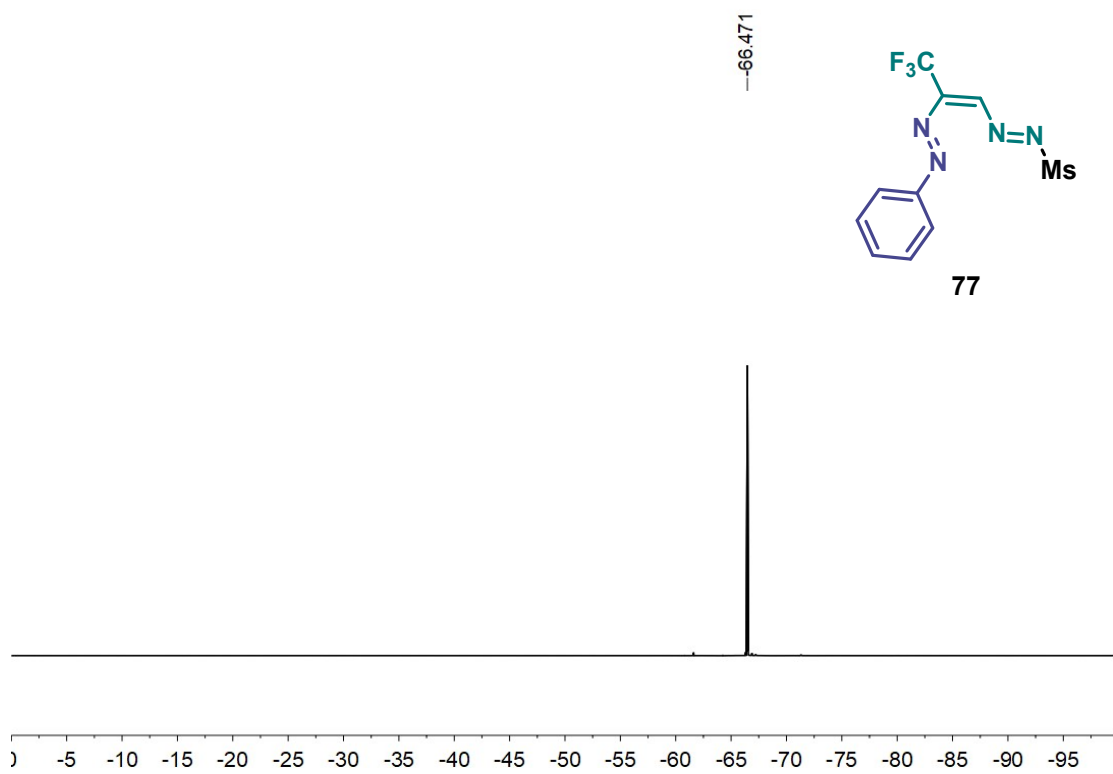

## VII. Computational details

All theoretical calculations of this work were performed based on density functional theory (DFT) methods with Gaussian 16 program.<sup>1</sup> All geometry optimizations were performed using the Becke's three-parameter hybrid exchange functional with Lee–Yang–Parr gradient-corrected correlation function<sup>2-4</sup> (B3LYP) with the basis set 6-31G(d)<sup>5</sup>. The larger basis sets 6-311++g(d,p) was employed in the calculations to accurately describe the intermolecular interactions. The vibrational frequency analysis of reactants, products, intermediates and the transition states were given at the same level. All reactant, intermediate and product configurations having no imaginary frequency and each transition state has only one imaginary frequency, which has been confirmed by the intrinsic reaction coordinate<sup>6</sup> (IRC). The SCRF calculations by using the SMD method<sup>7</sup> are carried out to simulate the solvent effects and methanol is used as a solvent in our calculations.

### Reference:

1. M. Frisch, G. Trucks, H. Schlegel, G. Scuseria, M. Robb, J. Cheeseman, G. Scalmani, V. Barone, G. Petersson, H. Nakatsuji, Gaussian16 (rev. C. 01). Gaussian, Wallingford, CT **2016**.
2. A. D. Becke, *Phys. Rev. A* **1988**, *38*, 3098.
3. A. D. Becke, *J. Chem. Phys.* **1993**, *98*, 5648.
4. C. Lee, W. Yang, R. G. Parr, *Phys. Rev. B* **1988**, *37*, 785.
5. R. Ditchfield, W. J. Hehre, J. A. Pople. *J. Chem. Phys.* **1971**, *54*, 724.
6. C. Gonzalez, H. B. Schlegel, *J. Phys. Chem.* **1990**, *94*, 5523.
7. A. V. Marenich, C. J. Cramer, D. G. Truhlar, *J. Phys. Chem. B* **2009**, *113*, 6378.

**Cartesian coordination and Gibbs free energies for all the calculated species were performed at the b3lyp/6-31g(d) //SMD<sub>Methanol</sub> level in the solvent phase.**

**1a** : (-1683.403164 a.u.)

|   |             |            |             |
|---|-------------|------------|-------------|
| S | 0.91266700  | 2.79576800 | 0.02204300  |
| O | 2.37733500  | 2.66093300 | -0.01453900 |
| O | 0.25400500  | 3.81414700 | -0.80586200 |
| N | -1.00503400 | 1.15683400 | -0.45520500 |
| N | 0.34330500  | 1.27993900 | -0.47233000 |
| C | -1.51797900 | 0.01242800 | -0.69445600 |
| C | 0.37036400  | 3.01723100 | 1.71499300  |
| H | -0.71865200 | 2.94210000 | 1.74550800  |

|   |             |             |             |
|---|-------------|-------------|-------------|
| H | 0.83648500  | 2.25149100  | 2.33749000  |
| H | 0.69240200  | 4.01602500  | 2.02326000  |
| H | 0.98114200  | 0.45056700  | -0.37087700 |
| C | -3.01362200 | -0.11547400 | -0.67273900 |
| F | -3.41841300 | -0.86747800 | -1.74304100 |
| F | -3.63146800 | 1.09195800  | -0.74112500 |
| C | -3.55329400 | -0.82617700 | 0.58941300  |
| F | -4.87873300 | -1.00835500 | 0.50691700  |
| F | -2.96592200 | -2.02804500 | 0.73104500  |
| F | -3.28939000 | -0.09098000 | 1.68055800  |
| H | -0.95513700 | -0.89415900 | -0.90943300 |
| N | 2.36491600  | -1.08992100 | -0.18388200 |
| C | 3.41616800  | -0.75646100 | -1.20220200 |
| H | 4.21101600  | -0.19047700 | -0.70790900 |
| H | 3.89250700  | -1.67824100 | -1.56452500 |
| C | 2.90857900  | -0.77353700 | 1.18860100  |
| C | 1.91465800  | -2.50948200 | -0.38428500 |
| H | 2.79187700  | -3.16958100 | -0.27225500 |
| C | 4.02231400  | -1.71796200 | 1.67164200  |
| H | 4.46294600  | -1.32408300 | 2.59571300  |
| H | 3.64084700  | -2.72119600 | 1.89272400  |
| H | 4.82863000  | -1.81313400 | 0.93563500  |
| C | 0.85730800  | -2.98409500 | 0.62174700  |
| H | 0.48443300  | -3.96406100 | 0.30206900  |
| H | 1.25739800  | -3.11096200 | 1.62903800  |
| H | -0.00083200 | -2.30468100 | 0.67263100  |
| C | 1.37402800  | -2.73894900 | -1.80493800 |
| H | 0.50575300  | -2.10435100 | -2.01701900 |
| H | 2.12250500  | -2.56323600 | -2.58145200 |
| H | 1.05449500  | -3.78318300 | -1.89716800 |
| C | 2.93377600  | 0.07628400  | -2.39296400 |
| H | 3.75308500  | 0.17492800  | -3.11730300 |
| H | 2.08266100  | -0.37335600 | -2.91169400 |
| H | 2.64788100  | 1.08458400  | -2.08063600 |
| C | 1.85059300  | -0.58574200 | 2.29176400  |
| H | 0.93590400  | -0.11842500 | 1.91447100  |
| H | 1.57059700  | -1.51780900 | 2.78829000  |
| H | 2.26766400  | 0.07248900  | 3.06383800  |
| H | 3.35665400  | 0.21557500  | 1.05140800  |

**TS1** : (-1683.400060 a.u.)

|   |            |            |             |
|---|------------|------------|-------------|
| S | 1.12033900 | 2.54584100 | 0.03750300  |
| O | 2.58378500 | 2.37227600 | 0.13733700  |
| O | 0.60648500 | 3.55009200 | -0.91509600 |

|   |             |             |             |
|---|-------------|-------------|-------------|
| N | -0.82896900 | 1.03964600  | -0.37046700 |
| N | 0.52325800  | 1.02112200  | -0.34769200 |
| C | -1.48142200 | -0.00928700 | -0.70502500 |
| C | 0.46879500  | 2.96392200  | 1.65739000  |
| H | -0.62157900 | 2.92741100  | 1.61586700  |
| H | 0.85617900  | 2.25229500  | 2.38841700  |
| H | 0.80781400  | 3.97767000  | 1.88822900  |
| H | 1.25334600  | 0.02686900  | -0.29566400 |
| C | -2.97861200 | 0.05076100  | -0.67023300 |
| F | -3.48964800 | -0.58134900 | -1.77551500 |
| F | -3.44543000 | 1.32815300  | -0.65860600 |
| C | -3.59843200 | -0.65847400 | 0.55456200  |
| F | -4.93843800 | -0.66304100 | 0.48626700  |
| F | -3.17278000 | -1.93376600 | 0.61607600  |
| F | -3.23257600 | -0.03367500 | 1.68527100  |
| H | -1.04713900 | -0.96080100 | -0.99975900 |
| N | 2.22443400  | -1.03292000 | -0.16444900 |
| C | 3.33566200  | -0.72281800 | -1.14834900 |
| H | 4.10965600  | -0.16909300 | -0.61316000 |
| H | 3.79497400  | -1.66634700 | -1.46264600 |
| C | 2.77383700  | -0.83212000 | 1.24695700  |
| C | 1.70035000  | -2.43186000 | -0.44027900 |
| H | 2.55511700  | -3.11017300 | -0.31435900 |
| C | 3.83120400  | -1.86481300 | 1.65462200  |
| H | 4.28269100  | -1.55156000 | 2.60330700  |
| H | 3.39709600  | -2.85827100 | 1.81082300  |
| H | 4.63700000  | -1.95023500 | 0.91803800  |
| C | 0.60346700  | -2.89498400 | 0.52715700  |
| H | 0.17504700  | -3.82670900 | 0.14150900  |
| H | 0.99214700  | -3.11323400 | 1.52286500  |
| H | -0.21250400 | -2.17341100 | 0.62581000  |
| C | 1.22174400  | -2.59285800 | -1.89113000 |
| H | 0.42670000  | -1.88736100 | -2.15215500 |
| H | 2.03014400  | -2.48077800 | -2.61725700 |
| H | 0.82190200  | -3.60549000 | -2.01122200 |
| C | 2.93858400  | 0.10055800  | -2.37604000 |
| H | 3.79243400  | 0.11629400  | -3.06494700 |
| H | 2.08279400  | -0.30856200 | -2.91725400 |
| H | 2.71292100  | 1.13488400  | -2.10880900 |
| C | 1.71028400  | -0.67576500 | 2.34817100  |
| H | 0.81313300  | -0.15772000 | 1.99973000  |
| H | 1.40444800  | -1.62713400 | 2.78856700  |
| H | 2.14733800  | -0.07571600 | 3.15511600  |
| H | 3.26678400  | 0.13936400  | 1.17098400  |

**Int1:** (-1683.401536 a.u.)

|   |             |             |             |
|---|-------------|-------------|-------------|
| S | -3.39706800 | -0.69455000 | 0.10144600  |
| O | -3.07098500 | -2.11516300 | -0.17707900 |
| O | -3.46895200 | -0.35244900 | 1.53753500  |
| N | -1.41794400 | 0.74473900  | -0.07200400 |
| N | -2.45839200 | 0.33256200  | -0.79518400 |
| C | -0.56261100 | 1.50801100  | -0.66634000 |
| C | -4.97916400 | -0.38774200 | -0.63531600 |
| H | -5.28400100 | 0.64110800  | -0.42110600 |
| H | -4.90469500 | -0.54527800 | -1.71576700 |
| H | -5.69226800 | -1.09583500 | -0.20010400 |
| H | 1.37519500  | -0.80938100 | -0.24018400 |
| C | 0.61491500  | 1.97516900  | 0.09505400  |
| F | 1.76176200  | 1.28966500  | -0.27039600 |
| F | 0.48766200  | 1.80731900  | 1.42643400  |
| C | 0.95877200  | 3.45084900  | -0.13529700 |
| F | 2.05246900  | 3.79352100  | 0.53915000  |
| F | 1.17271800  | 3.67924900  | -1.42973400 |
| F | -0.04566200 | 4.22050400  | 0.27338100  |
| H | -0.64880000 | 1.81872600  | -1.71375400 |
| N | 1.39643100  | -1.83545900 | -0.12572300 |
| C | 0.17007800  | -2.34762500 | -0.83979700 |
| H | 0.24161900  | -3.44287900 | -0.83868900 |
| H | -0.69777600 | -2.05709400 | -0.24559400 |
| C | 2.66769300  | -2.32965800 | -0.84877800 |
| C | 1.35927400  | -2.07672100 | 1.38817700  |
| H | 1.51805800  | -3.15470900 | 1.51047600  |
| C | 3.24708800  | -3.58643400 | -0.23733100 |
| H | 4.01629700  | -3.95783700 | -0.92564100 |
| H | 3.72860300  | -3.42031300 | 0.73320100  |
| H | 2.49490700  | -4.37853700 | -0.13325400 |
| C | 2.46469100  | -1.28428900 | 2.06108700  |
| H | 2.38151100  | -1.42323700 | 3.14514300  |
| H | 3.47238500  | -1.59582800 | 1.77172700  |
| H | 2.35344800  | -0.21047400 | 1.85299600  |
| C | 0.01486500  | -1.68703100 | 1.97961700  |
| H | -0.27757600 | -0.66776100 | 1.68739300  |
| H | -0.79701700 | -2.37322400 | 1.71555500  |
| H | 0.11120100  | -1.70910700 | 3.07170600  |
| C | 0.02062700  | -1.76348100 | -2.22624300 |
| H | -0.99162200 | -1.98709100 | -2.58397800 |
| H | 0.12951400  | -0.66860900 | -2.20054000 |
| H | 0.72532800  | -2.16543500 | -2.96247400 |

|   |            |             |             |
|---|------------|-------------|-------------|
| C | 3.66196400 | -1.20183900 | -1.03005800 |
| H | 3.20585300 | -0.35812600 | -1.56456700 |
| H | 4.08245300 | -0.83413000 | -0.08723600 |
| H | 4.49253700 | -1.57109200 | -1.64430800 |
| H | 2.30707300 | -2.60064500 | -1.84555800 |

**TS2: (-1683.380134a.u.)**

|   |             |             |             |
|---|-------------|-------------|-------------|
| S | -3.59626400 | -0.97004300 | 0.02156600  |
| O | -3.17224100 | -2.24552100 | -0.56329400 |
| O | -3.58605500 | -0.82373400 | 1.47627600  |
| N | -1.83753600 | 0.79133500  | 0.06618300  |
| N | -2.57764500 | 0.23362700  | -0.77478000 |
| C | -0.93809400 | 1.68176100  | -0.47342200 |
| C | -5.16791500 | -0.50089200 | -0.63426800 |
| H | -5.42796700 | 0.48928900  | -0.24571100 |
| H | -5.09859600 | -0.48709600 | -1.72650500 |
| H | -5.90088300 | -1.24585500 | -0.30592500 |
| H | 1.74390200  | -0.33731400 | 0.08441400  |
| C | -0.04582700 | 2.24750200  | 0.35987800  |
| F | 1.82300000  | 0.81557700  | 0.39142300  |
| F | -0.09189500 | 2.09783100  | 1.65725600  |
| C | 0.93037600  | 3.30824400  | -0.09524600 |
| F | 1.94475400  | 3.44484700  | 0.74115000  |
| F | 1.38966200  | 3.04797800  | -1.31442000 |
| F | 0.29141100  | 4.48617600  | -0.14940400 |
| H | -0.91520100 | 1.88042100  | -1.54514600 |
| N | 1.67990400  | -1.53397100 | -0.19965900 |
| C | 0.62797200  | -1.63128100 | -1.25154600 |
| H | 0.57356200  | -2.66782800 | -1.61889200 |
| H | -0.33047500 | -1.40818100 | -0.77834900 |
| C | 3.01838400  | -1.95173800 | -0.77502300 |
| C | 1.29097300  | -2.20961900 | 1.09099900  |
| H | 1.28812600  | -3.29611500 | 0.91424000  |
| C | 3.29987600  | -3.43812600 | -0.65592000 |
| H | 4.18928300  | -3.67170300 | -1.25555200 |
| H | 3.51068100  | -3.75198200 | 0.37439000  |
| H | 2.47294800  | -4.04774200 | -1.04366600 |
| C | 2.28875800  | -1.85622100 | 2.18398800  |
| H | 1.91688700  | -2.22308400 | 3.14809000  |
| H | 3.27821400  | -2.29752800 | 2.03204400  |
| H | 2.39547900  | -0.76469900 | 2.24781300  |
| C | -0.09998900 | -1.78305300 | 1.54341900  |
| H | -0.19656700 | -0.68736000 | 1.53768900  |
| H | -0.90776700 | -2.21583600 | 0.94181200  |



|   |             |             |             |
|---|-------------|-------------|-------------|
| H | -0.25574500 | -2.12461900 | 2.57390900  |
| C | 0.83698800  | -0.63370300 | -2.37756300 |
| H | -0.11174500 | -0.48172500 | -2.90808900 |
| H | 1.16031100  | 0.33282800  | -1.96757300 |
| H | 1.57450700  | -0.95602000 | -3.12180700 |
| C | 4.16739100  | -1.08455300 | -0.28201200 |
| H | 3.87244000  | -0.02918000 | -0.27107200 |
| H | 4.51651200  | -1.35520000 | 0.72093400  |
| H | 5.01689200  | -1.20255800 | -0.96710200 |
| H | 2.92299400  | -1.73473800 | -1.84481900 |

**Int2:** (-1614.146333a.u.)

|   |             |             |             |
|---|-------------|-------------|-------------|
| S | 4.23449500  | -1.62779200 | 0.07696100  |
| O | 4.53134400  | -2.15908600 | 1.42146300  |
| O | 3.37304400  | -2.41253100 | -0.82442300 |
| N | 2.43705200  | 0.12293300  | -0.12715800 |
| N | 3.58234600  | 0.00831800  | 0.37658000  |
| C | 1.84142800  | 1.34919400  | 0.09828100  |
| C | 5.76111800  | -1.20243300 | -0.75147400 |
| H | 5.52110500  | -0.74704100 | -1.71513600 |
| H | 6.32040400  | -0.51087700 | -0.11763000 |
| H | 6.31998100  | -2.13177800 | -0.89418000 |
| C | 0.60864500  | 1.56482500  | -0.40902900 |
| F | -0.00611300 | 0.68480300  | -1.18461200 |
| C | -0.08478700 | 2.91274300  | -0.36251400 |
| F | -1.40334700 | 2.79700400  | -0.56164900 |
| F | 0.13078300  | 3.52596600  | 0.81337600  |
| F | 0.40121900  | 3.71676000  | -1.33468600 |
| H | 2.34273000  | 2.11329900  | 0.68628200  |
| C | -4.40051600 | -1.27770300 | -0.00986600 |
| C | -4.52472700 | 0.05184200  | 0.41957100  |
| C | -3.43423000 | 0.72607800  | 0.95531700  |
| C | -2.18621700 | 0.08844600  | 1.08021300  |
| C | -2.07041000 | -1.23874800 | 0.64509700  |
| C | -3.16409900 | -1.92180300 | 0.10591500  |
| H | -5.48896900 | 0.54472400  | 0.32946100  |
| H | -3.54511100 | 1.75697800  | 1.28289900  |
| H | -1.11318000 | -1.74797900 | 0.73036300  |
| H | -3.03665800 | -2.94980300 | -0.21453500 |
| O | -5.53954100 | -1.85338700 | -0.51964600 |
| C | -5.46424000 | -3.20911800 | -0.95799600 |
| H | -5.19177400 | -3.88189400 | -0.13522300 |
| H | -6.46467800 | -3.46246900 | -1.31565700 |
| H | -4.74526300 | -3.32631900 | -1.77843000 |

|   |             |            |            |
|---|-------------|------------|------------|
| N | -1.06549100 | 0.79021000 | 1.55799500 |
| H | -0.36360100 | 0.19484300 | 1.98928700 |
| H | -1.29768900 | 1.56204100 | 2.17709800 |

**TS3:** (-1614.139411a.u.)

|   |             |             |             |
|---|-------------|-------------|-------------|
| S | 4.35691300  | -1.45425200 | 0.08690200  |
| O | 4.92412300  | -1.94995400 | 1.36162000  |
| O | 3.47786300  | -2.36675400 | -0.67650000 |
| N | 2.40663100  | 0.10870400  | 0.01254000  |
| N | 3.61296300  | 0.06554100  | 0.46059800  |
| C | 1.73547000  | 1.24318800  | 0.25162100  |
| C | 5.70965200  | -0.93499000 | -0.96767300 |
| H | 5.29612300  | -0.52351600 | -1.89152800 |
| H | 6.29856900  | -0.18284400 | -0.43820200 |
| H | 6.31932100  | -1.81795300 | -1.17987400 |
| C | 0.41292400  | 1.33220800  | -0.19326900 |
| F | -0.01280800 | 0.48940000  | -1.14234300 |
| C | -0.21789500 | 2.71129000  | -0.34558600 |
| F | -1.51952800 | 2.62954100  | -0.65735600 |
| F | -0.09119000 | 3.41792100  | 0.79304700  |
| F | 0.39450200  | 3.39865300  | -1.32907800 |
| H | 2.16250400  | 2.06174200  | 0.82832800  |
| C | -4.44946800 | -1.16633900 | 0.06149700  |
| C | -4.44165300 | 0.13763700  | 0.58522900  |
| C | -3.25209900 | 0.72252800  | 0.99390900  |
| C | -2.04938900 | 0.00794300  | 0.89171800  |
| C | -2.05436700 | -1.28711100 | 0.36686500  |
| C | -3.24801700 | -1.87942200 | -0.04565500 |
| H | -5.38142400 | 0.67544800  | 0.66778900  |
| H | -3.25245200 | 1.73043100  | 1.39954500  |
| H | -1.12299300 | -1.84100100 | 0.28615700  |
| H | -3.22855100 | -2.88819800 | -0.44087600 |
| O | -5.67088200 | -1.64885300 | -0.30723200 |
| C | -5.74400900 | -2.97192700 | -0.84554000 |
| H | -5.39795200 | -3.71613700 | -0.11866100 |
| H | -6.79958300 | -3.14206300 | -1.06600200 |
| H | -5.15947800 | -3.05787900 | -1.76899300 |
| N | -0.81421700 | 0.61101700  | 1.27114800  |
| H | -0.14833800 | -0.06872500 | 1.64156300  |
| H | -0.92850900 | 1.35670700  | 1.96009700  |

**Int3:** (-1984.945729a.u.)

|   |             |            |             |
|---|-------------|------------|-------------|
| S | -0.43246900 | 3.95499500 | -1.03882000 |
| O | 0.13239000  | 5.22514400 | -1.55292600 |

|   |             |             |             |
|---|-------------|-------------|-------------|
| O | -0.49928300 | 2.80845000  | -1.98571500 |
| N | 0.36999000  | 2.31798200  | 0.63068200  |
| N | 0.42753800  | 3.61554000  | 0.36096800  |
| C | 0.98783800  | 1.86160900  | 1.67818600  |
| C | -2.11622400 | 4.29396800  | -0.50507000 |
| H | -2.52405600 | 3.39575600  | -0.03619900 |
| H | -2.09594900 | 5.12073000  | 0.20869700  |
| H | -2.70620300 | 4.56527500  | -1.38502700 |
| C | 0.82798400  | 0.41311200  | 1.93036600  |
| F | -0.36746300 | 0.10052700  | 2.60007900  |
| C | 1.92811500  | -0.19275700 | 2.82520600  |
| F | 1.75294000  | -1.51844700 | 2.97467500  |
| F | 3.15157500  | 0.02174800  | 2.32192500  |
| F | 1.86448600  | 0.37680800  | 4.03822800  |
| H | 1.54157700  | 2.47508400  | 2.38709000  |
| C | 4.04483100  | -1.39000100 | -1.74389400 |
| C | 3.47403500  | -0.11087600 | -1.85955500 |
| C | 2.37428100  | 0.24152900  | -1.09059200 |
| C | 1.84715800  | -0.69440900 | -0.19928400 |
| C | 2.38761800  | -1.97000700 | -0.08220200 |
| C | 3.49229100  | -2.32429900 | -0.85641800 |
| H | 3.90284900  | 0.59433800  | -2.56447700 |
| H | 1.92428700  | 1.22190500  | -1.20104500 |
| H | 1.95616800  | -2.69459500 | 0.60178600  |
| H | 3.90323900  | -3.32192200 | -0.76109200 |
| O | 5.11948000  | -1.62772800 | -2.53957000 |
| C | 5.75906900  | -2.90694500 | -2.46392200 |
| H | 5.07291600  | -3.70982500 | -2.75622500 |
| H | 6.58914700  | -2.86098600 | -3.17102800 |
| H | 6.14549300  | -3.09556100 | -1.45591300 |
| N | 0.66034400  | -0.34177100 | 0.61450300  |
| H | 0.11175500  | -1.18990900 | 0.81402400  |
| H | 0.04998400  | 0.29553200  | 0.06616600  |
| N | -3.56562200 | -1.75940400 | -0.72216600 |
| C | -4.13966100 | -2.20370800 | -2.01408100 |
| H | -4.91438100 | -2.97219600 | -1.85676900 |
| H | -4.65284100 | -1.37014500 | -2.49694700 |
| C | -3.52968600 | -2.92427900 | 0.20930500  |
| C | -4.17533200 | -0.48781300 | -0.24831900 |
| H | -5.27757500 | -0.58106500 | -0.21305100 |
| C | -4.84393300 | -3.21977100 | 0.95865900  |
| H | -4.78149400 | -4.20180800 | 1.44374800  |
| H | -5.06598600 | -2.48424600 | 1.73812900  |
| H | -5.69666500 | -3.24878300 | 0.26981100  |

|                                |             |             |             |
|--------------------------------|-------------|-------------|-------------|
| C                              | -3.71018700 | -0.04875200 | 1.14777900  |
| H                              | -4.17284300 | 0.91767100  | 1.38103400  |
| H                              | -3.99572000 | -0.73920700 | 1.94352000  |
| H                              | -2.62346000 | 0.08822500  | 1.18535500  |
| C                              | -3.83287400 | 0.66147900  | -1.21562000 |
| H                              | -2.74855900 | 0.82723400  | -1.24811200 |
| H                              | -4.17381900 | 0.49005500  | -2.24065500 |
| H                              | -4.30994700 | 1.58625700  | -0.87042300 |
| C                              | -3.07577800 | -2.74092400 | -2.97238100 |
| H                              | -3.53727200 | -3.08590100 | -3.90678300 |
| H                              | -2.34533200 | -1.96060100 | -3.21786100 |
| H                              | -2.52939900 | -3.58826100 | -2.53996700 |
| C                              | -2.31021000 | -2.92770400 | 1.14435600  |
| H                              | -1.39249100 | -2.80682300 | 0.55530600  |
| H                              | -2.33624200 | -2.14690100 | 1.90829400  |
| H                              | -2.24620000 | -3.89331900 | 1.66228400  |
| H                              | -3.36777300 | -3.78171900 | -0.45405300 |
| <b>TS4: (-1984.910589a.u.)</b> |             |             |             |
| S                              | -2.03148100 | -1.46681800 | 2.74069700  |
| O                              | -3.47605900 | -1.76784000 | 2.79456900  |
| O                              | -1.19995300 | -2.16770800 | 1.74457100  |
| N                              | -1.41186400 | 0.60995700  | 1.46957500  |
| N                              | -1.93382900 | 0.30419200  | 2.57259900  |
| C                              | -1.34040000 | 1.96165300  | 1.22641600  |
| C                              | -1.32086300 | -1.65642900 | 4.37022100  |
| H                              | -0.26614200 | -1.37532700 | 4.32702200  |
| H                              | -1.86982100 | -1.01947500 | 5.06711800  |
| H                              | -1.42729200 | -2.70954700 | 4.64585500  |
| C                              | -0.77409100 | 2.41659400  | 0.08047600  |
| F                              | 1.32413200  | 2.40803000  | 0.14421900  |
| C                              | -0.80661900 | 3.90711100  | -0.20556700 |
| F                              | -0.10004500 | 4.22990400  | -1.30438300 |
| F                              | -2.08283200 | 4.30373500  | -0.43026800 |
| F                              | -0.34125000 | 4.61828300  | 0.82750200  |
| H                              | -1.67868600 | 2.66618000  | 1.98331800  |
| C                              | -2.82914500 | -1.71601900 | -2.30456800 |
| C                              | -1.48059600 | -1.91077900 | -1.96170900 |
| C                              | -0.70317400 | -0.84023400 | -1.54025400 |
| C                              | -1.28309900 | 0.42396200  | -1.46206800 |
| C                              | -2.61194400 | 0.63917600  | -1.80290900 |
| C                              | -3.39642200 | -0.43591700 | -2.22203200 |
| H                              | -1.05908800 | -2.90866500 | -2.03142300 |
| H                              | 0.33985700  | -0.98489700 | -1.27511000 |
| H                              | -3.04015500 | 1.63522000  | -1.73701300 |

|                                 |             |             |             |
|---------------------------------|-------------|-------------|-------------|
| H                               | -4.43368600 | -0.26349000 | -2.48231200 |
| O                               | -3.50046300 | -2.82923400 | -2.70771900 |
| C                               | -4.87493500 | -2.69872800 | -3.08521400 |
| H                               | -4.98845700 | -2.01939200 | -3.93796000 |
| H                               | -5.19633300 | -3.70150000 | -3.37257700 |
| H                               | -5.48460900 | -2.34575600 | -2.24549900 |
| N                               | -0.43693100 | 1.56783900  | -1.07957500 |
| H                               | -0.32624700 | 2.18989500  | -1.89142000 |
| H                               | 0.57360200  | 1.37086500  | -0.79039500 |
| N                               | 3.77145500  | -1.22077000 | -0.34427600 |
| C                               | 4.15780200  | -2.60921800 | -0.69066000 |
| H                               | 5.23638000  | -2.67217700 | -0.91201400 |
| H                               | 4.00000900  | -3.25874000 | 0.17264200  |
| C                               | 4.57636500  | -0.28003800 | -1.17937900 |
| C                               | 3.74125400  | -1.02157200 | 1.13271700  |
| H                               | 4.68508200  | -1.38953000 | 1.57835200  |
| C                               | 5.99902400  | 0.02443200  | -0.66657000 |
| H                               | 6.58088100  | 0.50690800  | -1.46181400 |
| H                               | 6.01225000  | 0.69486800  | 0.19789000  |
| H                               | 6.52801900  | -0.89496300 | -0.38811900 |
| C                               | 3.55886200  | 0.43384100  | 1.58675500  |
| H                               | 3.50766300  | 0.44563300  | 2.68272500  |
| H                               | 4.38777900  | 1.08523100  | 1.30187400  |
| H                               | 2.63428400  | 0.87771200  | 1.20378000  |
| C                               | 2.58382900  | -1.83103100 | 1.74745500  |
| H                               | 1.61926900  | -1.44320200 | 1.39799600  |
| H                               | 2.61982100  | -2.89858000 | 1.51055200  |
| H                               | 2.60993500  | -1.74157300 | 2.84043800  |
| C                               | 3.36320200  | -3.17093500 | -1.87021300 |
| H                               | 3.71168700  | -4.18131200 | -2.12093400 |
| H                               | 2.29508000  | -3.22854800 | -1.62795100 |
| H                               | 3.47160000  | -2.55118900 | -2.76865500 |
| C                               | 3.80803000  | 0.98720400  | -1.58288300 |
| H                               | 2.88909200  | 0.71108800  | -2.11486000 |
| H                               | 3.51848700  | 1.62645900  | -0.74707500 |
| H                               | 4.42179100  | 1.58488300  | -2.26981900 |
| H                               | 4.71908400  | -0.82626900 | -2.11908800 |
| <b>Int4: (-1884.531692a.u.)</b> |             |             |             |
| S                               | 4.73405400  | -1.08626900 | -0.02764100 |
| O                               | 5.93071300  | -1.90158100 | -0.31254300 |
| O                               | 4.49646100  | 0.12365700  | -0.84406000 |
| N                               | 2.29673800  | -1.59672800 | -0.14546500 |
| N                               | 3.40927200  | -2.22577000 | -0.16054700 |
| C                               | 1.19805300  | -2.37628000 | -0.25621200 |

|   |             |             |             |
|---|-------------|-------------|-------------|
| C | 4.73518800  | -0.61633200 | 1.70407200  |
| H | 3.80639300  | -0.08412600 | 1.92125500  |
| H | 4.82099200  | -1.51943700 | 2.31240800  |
| H | 5.59778500  | 0.03697100  | 1.86376700  |
| C | -0.08682500 | -1.84678400 | -0.23498000 |
| C | -1.22892800 | -2.85998300 | -0.30466400 |
| F | -1.79828000 | -3.00951400 | 0.91105000  |
| F | -2.19140600 | -2.44609000 | -1.15442100 |
| F | -0.82581100 | -4.07117800 | -0.71335600 |
| H | 1.31921500  | -3.45008300 | -0.36211400 |
| C | 1.99432300  | 2.82789100  | 0.16451800  |
| C | 1.46793600  | 2.23827300  | 1.32565800  |
| C | 0.65876700  | 1.11163600  | 1.23275000  |
| C | 0.36545900  | 0.56817200  | -0.02197200 |
| C | 0.87297600  | 1.15871100  | -1.17750200 |
| C | 1.69187100  | 2.28612400  | -1.09213200 |
| H | 1.70551200  | 2.67524600  | 2.29104600  |
| H | 0.25997900  | 0.64959400  | 2.13085800  |
| H | 0.63820300  | 0.73411600  | -2.14915100 |
| H | 2.08231700  | 2.72741900  | -2.00141000 |
| O | 2.78172300  | 3.92301200  | 0.36323500  |
| C | 3.37443800  | 4.55045000  | -0.77774100 |
| H | 2.60949800  | 4.93774500  | -1.46090500 |
| H | 3.96369500  | 5.38069600  | -0.38371000 |
| H | 4.03233100  | 3.85620500  | -1.31333400 |
| N | -0.49775900 | -0.57971000 | -0.11966500 |
| H | -1.50956400 | -0.37675600 | -0.08540200 |
| N | -3.51205500 | 0.79440700  | 0.23204100  |
| C | -3.02482900 | 2.04142700  | 0.89395100  |
| H | -3.85312500 | 2.54723100  | 1.42327900  |
| H | -2.31283800 | 1.73668400  | 1.66291000  |
| C | -4.22235500 | 1.11465200  | -1.05108700 |
| C | -4.31666800 | 0.02851800  | 1.24083200  |
| H | -5.14080900 | 0.67360000  | 1.59514500  |
| C | -5.64675400 | 1.67813200  | -0.89301000 |
| H | -5.99760800 | 2.05967000  | -1.85971000 |
| H | -6.36856900 | 0.92595800  | -0.55755800 |
| H | -5.67393800 | 2.51278800  | -0.18245000 |
| C | -4.95140600 | -1.26140000 | 0.70270700  |
| H | -5.45339700 | -1.77309800 | 1.53209400  |
| H | -5.70775800 | -1.08238500 | -0.06321700 |
| H | -4.20042000 | -1.94488900 | 0.29660100  |
| C | -3.46972500 | -0.33822300 | 2.47387400  |
| H | -2.57626500 | -0.90197100 | 2.18233800  |

|   |             |             |             |
|---|-------------|-------------|-------------|
| H | -3.15601100 | 0.52883300  | 3.06062500  |
| H | -4.06314900 | -0.97507700 | 3.13960000  |
| C | -2.31927200 | 3.07009800  | 0.00788300  |
| H | -1.79435500 | 3.78045400  | 0.65806600  |
| H | -1.57323300 | 2.60697200  | -0.64636100 |
| H | -3.00872300 | 3.65240100  | -0.61199300 |
| C | -4.15446700 | -0.00629500 | -2.10025900 |
| H | -3.12399700 | -0.35344700 | -2.22507400 |
| H | -4.78176500 | -0.87132900 | -1.87527100 |
| H | -4.48821600 | 0.39600900  | -3.06541800 |
| H | -3.62879100 | 1.91653900  | -1.49183600 |

**TS5:** (-1884.518213a.u.)

|   |             |             |             |
|---|-------------|-------------|-------------|
| S | 4.51184900  | -1.27598300 | -0.00120200 |
| O | 5.65226600  | -2.19130900 | -0.21919200 |
| O | 4.43696200  | -0.05988500 | -0.84669400 |
| N | 2.04760100  | -1.56235300 | -0.08197300 |
| N | 3.12593300  | -2.27887700 | -0.17980300 |
| C | 0.90701500  | -2.24106200 | -0.21437400 |
| C | 4.50992500  | -0.75478300 | 1.71752600  |
| H | 3.61695500  | -0.15309000 | 1.89947300  |
| H | 4.51639000  | -1.64332200 | 2.35291200  |
| H | 5.41230900  | -0.15939700 | 1.88259000  |
| C | -0.38062200 | -1.65611200 | -0.13901600 |
| C | -1.48334400 | -2.69519700 | -0.34433400 |
| F | -2.66356000 | -2.29014100 | 0.15009300  |
| F | -1.65545400 | -2.94048600 | -1.66320500 |
| F | -1.19391800 | -3.87161500 | 0.24383700  |
| H | 0.95886500  | -3.31435800 | -0.38848200 |
| C | 2.13699300  | 2.67409800  | 0.15164500  |
| C | 1.55864300  | 2.19885000  | 1.33871500  |
| C | 0.61075500  | 1.18089800  | 1.29843300  |
| C | 0.22345200  | 0.63074500  | 0.07206800  |
| C | 0.78463200  | 1.11751400  | -1.10941100 |
| C | 1.74096900  | 2.13373600  | -1.07872200 |
| H | 1.86988800  | 2.63158700  | 2.28515900  |
| H | 0.17946000  | 0.80347800  | 2.22103200  |
| H | 0.48242000  | 0.69297500  | -2.06271100 |
| H | 2.16689000  | 2.48929700  | -2.00961900 |
| O | 3.06884300  | 3.66286000  | 0.29725200  |
| C | 3.77214700  | 4.10217500  | -0.86765400 |
| H | 3.09407800  | 4.56700900  | -1.59333700 |
| H | 4.49014400  | 4.84581700  | -0.51600000 |
| H | 4.30753300  | 3.27055900  | -1.34094000 |

|   |             |             |             |
|---|-------------|-------------|-------------|
| N | -0.77478000 | -0.40494200 | 0.02111200  |
| H | -1.96814300 | 0.04436200  | 0.11035200  |
| N | -3.16331200 | 0.82682700  | 0.24291800  |
| C | -2.68197500 | 2.17960300  | 0.75244800  |
| H | -3.53266700 | 2.69048000  | 1.21804600  |
| H | -1.96754100 | 1.97186300  | 1.54826900  |
| C | -3.78164100 | 0.99573900  | -1.13442600 |
| C | -4.08467300 | 0.29158300  | 1.34860900  |
| H | -4.68272100 | 1.15387700  | 1.66836900  |
| C | -5.07096300 | 1.83122300  | -1.15074500 |
| H | -5.30480000 | 2.09253100  | -2.18932100 |
| H | -5.93319100 | 1.29246700  | -0.74779600 |
| H | -4.96738800 | 2.76771800  | -0.59379000 |
| C | -5.10220500 | -0.79900000 | 0.98631600  |
| H | -5.68442400 | -0.99364800 | 1.89495900  |
| H | -5.81240000 | -0.48854400 | 0.21933700  |
| H | -4.65030000 | -1.74244700 | 0.68337400  |
| C | -3.25310700 | -0.17410000 | 2.55376100  |
| H | -2.66906400 | -1.06728300 | 2.31310700  |
| H | -2.57299900 | 0.59415800  | 2.93044000  |
| H | -3.93397300 | -0.43198600 | 3.37253500  |
| C | -2.04232500 | 3.14285000  | -0.24521900 |
| H | -1.59782100 | 3.96076400  | 0.33457700  |
| H | -1.24378400 | 2.68718300  | -0.83395100 |
| H | -2.77051600 | 3.58874700  | -0.92905200 |
| C | -3.92676800 | -0.30501800 | -1.93220700 |
| H | -2.97446400 | -0.83312100 | -2.01417300 |
| H | -4.67405700 | -0.99263000 | -1.53421800 |
| H | -4.23642100 | -0.03632900 | -2.94945600 |
| H | -3.02555600 | 1.56682100  | -1.67617200 |

**Int5:** (-1884.552212a.u.)

|   |             |             |             |
|---|-------------|-------------|-------------|
| S | 0.74541800  | 0.73243500  | 0.88975800  |
| O | 2.20604500  | 0.57020800  | 1.15178400  |
| O | 0.37710500  | 1.72313800  | -0.15785100 |
| N | -1.12680500 | -0.76999000 | 0.38289900  |
| N | 0.19546700  | -0.81100900 | 0.57647900  |
| C | -1.70024800 | -1.90208200 | 0.07974300  |
| C | -0.00819100 | 1.29186000  | 2.42541800  |
| H | -1.09124000 | 1.32298400  | 2.28823100  |
| H | 0.25939000  | 0.59322700  | 3.22118700  |
| H | 0.37871800  | 2.29102900  | 2.64292800  |
| C | -3.13834500 | -2.00947800 | -0.09690000 |
| C | -3.59585200 | -3.46301800 | -0.23861400 |
| F | -3.27058100 | -4.18520200 | 0.86233000  |



|   |             |             |             |
|---|-------------|-------------|-------------|
| F | -4.91734700 | -3.59075400 | -0.42359700 |
| F | -2.98150700 | -4.06174200 | -1.28998300 |
| H | -1.10584300 | -2.81461500 | -0.00988300 |
| C | -3.73918600 | 3.06253200  | -0.08244300 |
| C | -4.35464500 | 2.38407800  | 0.97837800  |
| C | -4.44924100 | 0.99565900  | 0.96485900  |
| C | -3.89682700 | 0.24852600  | -0.08895400 |
| C | -3.29801900 | 0.93731700  | -1.15289200 |
| C | -3.21859200 | 2.33086200  | -1.15735900 |
| H | -4.76735400 | 2.95963400  | 1.80249600  |
| H | -4.94315200 | 0.47754900  | 1.78245300  |
| H | -2.88774100 | 0.37731600  | -1.98844600 |
| H | -2.74917100 | 2.82929500  | -1.99799300 |
| O | -3.70570700 | 4.43103500  | 0.01810900  |
| C | -3.06612300 | 5.16460000  | -1.02632400 |
| H | -3.57121100 | 5.01513400  | -1.98863900 |
| H | -3.14002700 | 6.21581100  | -0.73935400 |
| H | -2.00924400 | 4.88652000  | -1.12071300 |
| N | -4.09399000 | -1.14803700 | -0.11702700 |
| H | 3.72522000  | 0.18368800  | 0.00886900  |
| N | 4.57179400  | -0.09866700 | -0.52056300 |
| C | 4.35980300  | 0.36425400  | -1.95575400 |
| H | 5.33395600  | 0.31785900  | -2.44759600 |
| H | 3.70355600  | -0.35394300 | -2.43886400 |
| C | 5.76539000  | 0.68830100  | 0.08538400  |
| C | 4.64132800  | -1.63559300 | -0.39736700 |
| H | 5.54134100  | -1.92587200 | -0.94432800 |
| C | 7.11142300  | 0.02306100  | -0.19214300 |
| H | 7.89469300  | 0.73727800  | 0.08368500  |
| H | 7.27059700  | -0.88504100 | 0.39537100  |
| H | 7.24496600  | -0.21461500 | -1.25250400 |
| C | 4.74583000  | -2.06788900 | 1.06753800  |
| H | 4.71136700  | -3.16147500 | 1.09954300  |
| H | 5.67520000  | -1.76116000 | 1.54783700  |
| H | 3.90011000  | -1.68806200 | 1.65093200  |
| C | 3.41433200  | -2.29974500 | -1.03476000 |
| H | 2.48025700  | -1.89058200 | -0.63337000 |
| H | 3.39578700  | -2.23192700 | -2.12465100 |
| H | 3.44596600  | -3.36493400 | -0.78465100 |
| C | 3.73158400  | 1.74905000  | -2.05680000 |
| H | 3.58650700  | 1.97193100  | -3.11974500 |
| H | 2.75122900  | 1.77770700  | -1.57072500 |
| H | 4.35448300  | 2.54441900  | -1.63696800 |
| C | 5.54591900  | 1.05125400  | 1.55413500  |

|   |            |            |             |
|---|------------|------------|-------------|
| H | 4.56469300 | 1.51033700 | 1.70816300  |
| H | 5.64601800 | 0.20287500 | 2.23382000  |
| H | 6.30665500 | 1.79020700 | 1.82933700  |
| H | 5.74563100 | 1.62533400 | -0.47102000 |

**TS6:** (-1884.529322a.u.)

|   |             |             |             |
|---|-------------|-------------|-------------|
| S | 0.78919400  | 0.54603500  | 0.95234600  |
| O | 2.19393500  | 0.02827200  | 1.21062700  |
| O | 0.72731300  | 1.81465000  | 0.13178400  |
| N | -1.44905400 | -1.16647100 | 0.18733900  |
| N | -0.26288200 | -1.30589600 | 0.33034400  |
| C | -2.46377800 | -1.96869400 | -0.11865500 |
| C | 0.15625700  | 1.00183300  | 2.59652600  |
| H | -0.87497100 | 1.34810500  | 2.49082900  |
| H | 0.20151000  | 0.12211000  | 3.24309800  |
| H | 0.79175800  | 1.80281500  | 2.98693900  |
| C | -3.82309000 | -1.51301400 | -0.14580700 |
| C | -4.81608200 | -2.67573200 | -0.22964300 |
| F | -4.82512200 | -3.39080300 | 0.92337300  |
| F | -6.07659200 | -2.27896500 | -0.46059000 |
| F | -4.48290600 | -3.54293000 | -1.21871100 |
| H | -2.25009700 | -3.02234300 | -0.28175400 |
| C | -2.41691400 | 3.39112700  | -0.11482400 |
| C | -3.15629100 | 2.98677300  | 1.00569400  |
| C | -3.77597000 | 1.74098900  | 1.02789900  |
| C | -3.64998400 | 0.85266300  | -0.05555000 |
| C | -2.92396200 | 1.27808600  | -1.17927200 |
| C | -2.31714200 | 2.53488200  | -1.21798100 |
| H | -3.24261400 | 3.66443400  | 1.85085800  |
| H | -4.36147200 | 1.44176800  | 1.89323000  |
| H | -2.84143200 | 0.62064200  | -2.04052700 |
| H | -1.76568400 | 2.82763600  | -2.10440300 |
| O | -1.84326100 | 4.63530400  | -0.03877300 |
| C | -1.00317200 | 5.05205600  | -1.11540500 |
| H | -1.56467400 | 5.13759800  | -2.05393000 |
| H | -0.62397700 | 6.03644800  | -0.83217300 |
| H | -0.16188400 | 4.36194400  | -1.25119200 |
| N | -4.38201200 | -0.35144500 | -0.05154600 |
| H | 3.63983400  | -0.30788800 | 0.04490100  |
| N | 4.46731400  | -0.60838900 | -0.51090500 |
| C | 4.25892000  | -0.07164000 | -1.92002500 |
| H | 5.19620700  | -0.22813800 | -2.45938000 |
| H | 3.49279200  | -0.68462500 | -2.38658400 |
| C | 5.70793500  | 0.07780000  | 0.11770800  |

|   |            |             |             |
|---|------------|-------------|-------------|
| C | 4.45577100 | -2.15090100 | -0.46917500 |
| H | 5.33588700 | -2.45921700 | -1.03821700 |
| C | 7.01390200 | -0.63555900 | -0.22412300 |
| H | 7.83740100 | 0.01846300  | 0.08234500  |
| H | 7.13321700 | -1.58583000 | 0.30337100  |
| H | 7.12059900 | -0.81293500 | -1.29924100 |
| C | 4.54698500 | -2.66899700 | 0.96865000  |
| H | 4.44815700 | -3.75878300 | 0.94052100  |
| H | 5.49778100 | -2.44516300 | 1.45294300  |
| H | 3.73123200 | -2.27326000 | 1.58299400  |
| C | 3.19351000 | -2.71482700 | -1.13446500 |
| H | 2.28422200 | -2.26712000 | -0.71794300 |
| H | 3.18398500 | -2.59959400 | -2.22049500 |
| H | 3.15925500 | -3.78934100 | -0.92901400 |
| C | 3.80722900 | 1.38357000  | -1.96481600 |
| H | 3.60205800 | 1.63276200  | -3.01203200 |
| H | 2.88330500 | 1.53308700  | -1.39720500 |
| H | 4.56006200 | 2.08977100  | -1.60305500 |
| C | 5.53111100 | 0.36001800  | 1.61046400  |
| H | 4.56551900 | 0.83313600  | 1.81294500  |
| H | 5.62230800 | -0.53002300 | 2.23614100  |
| H | 6.31811600 | 1.06060100  | 1.91089500  |
| H | 5.72721200 | 1.04765000  | -0.37798900 |

**Int6:** (-924.675622a.u.)

|   |             |             |             |
|---|-------------|-------------|-------------|
| N | 3.61092400  | 1.71986300  | -0.41667400 |
| N | 3.80669400  | 2.81454200  | -0.65494600 |
| C | 3.35774600  | 0.46691100  | -0.14370100 |
| C | 1.98096700  | 0.06191200  | 0.03114700  |
| C | 1.82253400  | -1.45462400 | 0.22315200  |
| F | 0.82124600  | -1.75475700 | 1.06784800  |
| F | 1.57626300  | -2.08333600 | -0.95016800 |
| F | 2.94736300  | -2.00492700 | 0.73076500  |
| H | 4.21674100  | -0.18551000 | -0.07633900 |
| C | -3.16128800 | 0.43409700  | 0.11779300  |
| C | -2.51350300 | 1.37763000  | 0.93156000  |
| C | -1.13383300 | 1.51097300  | 0.88476500  |
| C | -0.35072900 | 0.67754800  | 0.06071500  |
| C | -1.01164900 | -0.25085500 | -0.75944500 |
| C | -2.40270300 | -0.37133800 | -0.73931200 |
| H | -3.11174400 | 2.00822400  | 1.58330500  |
| H | -0.63765200 | 2.25585100  | 1.50062400  |
| H | -0.44215100 | -0.87176100 | -1.44241200 |
| H | -2.87753100 | -1.09064300 | -1.39690600 |

|   |             |             |             |
|---|-------------|-------------|-------------|
| O | -4.52408400 | 0.39009400  | 0.22383300  |
| C | -5.23489900 | -0.54492200 | -0.58989100 |
| H | -4.93657500 | -1.57615400 | -0.36606600 |
| H | -6.28977000 | -0.41072800 | -0.34197400 |
| H | -5.08287100 | -0.34140200 | -1.65672700 |
| N | 1.03016900  | 0.92767400  | 0.02435100  |

**TS7:** (-924.662441a.u.)

|   |             |             |             |
|---|-------------|-------------|-------------|
| N | 3.27585800  | 1.99813500  | -0.43340400 |
| N | 2.41540500  | 2.77559800  | -0.50830800 |
| C | 3.38892500  | 0.69185700  | -0.23625700 |
| C | 2.07769100  | 0.13456300  | -0.03780600 |
| C | 2.03438200  | -1.36671600 | 0.22064600  |
| F | 1.10417800  | -1.68953800 | 1.13628900  |
| F | 1.75225500  | -2.05270000 | -0.91033800 |
| F | 3.22030000  | -1.82096000 | 0.67198900  |
| H | 4.34432400  | 0.19790700  | -0.20943000 |
| C | -3.10676500 | 0.31174600  | 0.12344400  |
| C | -2.48424400 | 1.35074100  | 0.83485100  |
| C | -1.11119400 | 1.52602100  | 0.75710300  |
| C | -0.31361200 | 0.65110200  | -0.00706800 |
| C | -0.94759900 | -0.37183800 | -0.73056600 |
| C | -2.33073000 | -0.54391900 | -0.66832300 |
| H | -3.09684000 | 2.01605300  | 1.43648200  |
| H | -0.63197500 | 2.33699500  | 1.29770300  |
| H | -0.36337700 | -1.03128000 | -1.36251900 |
| H | -2.78767800 | -1.34098000 | -1.24354900 |
| O | -4.46282800 | 0.22618900  | 0.25888500  |
| C | -5.14957000 | -0.81440900 | -0.44098500 |
| H | -4.80470500 | -1.80449600 | -0.12000400 |
| H | -6.20420100 | -0.69625200 | -0.18442900 |
| H | -5.02472300 | -0.71402300 | -1.52569100 |
| N | 1.05695100  | 0.92347600  | -0.07705200 |

**pro:** (-924.708525a.u.)

|   |            |             |             |
|---|------------|-------------|-------------|
| N | 2.82072000 | 2.25938000  | -0.48238800 |
| N | 1.51172800 | 2.24989200  | -0.44448800 |
| C | 3.27919900 | 1.00084700  | -0.26528900 |
| C | 2.19688200 | 0.17048700  | -0.07694900 |
| C | 2.17415600 | -1.28830500 | 0.22779300  |
| F | 1.31589400 | -1.58627400 | 1.22593300  |
| F | 1.81152700 | -2.03858500 | -0.84017500 |
| F | 3.40208300 | -1.69669400 | 0.59970700  |

|   |             |             |             |
|---|-------------|-------------|-------------|
| H | 4.33251300  | 0.76184300  | -0.24672700 |
| C | -3.02618600 | 0.21462900  | 0.15059100  |
| C | -2.42373900 | 1.23452600  | 0.90715500  |
| C | -1.06200700 | 1.47494100  | 0.79931700  |
| C | -0.29190700 | 0.69846700  | -0.07448400 |
| C | -0.88182300 | -0.30592700 | -0.83959400 |
| C | -2.24883800 | -0.55792500 | -0.72310000 |
| H | -3.03937700 | 1.82267200  | 1.58076800  |
| H | -0.59212600 | 2.25392700  | 1.39064700  |
| H | -0.28621500 | -0.88938200 | -1.53297300 |
| H | -2.69234900 | -1.34288000 | -1.32372900 |
| O | -4.36472200 | 0.05598800  | 0.33514500  |
| C | -5.04102000 | -0.96674400 | -0.40436300 |
| H | -4.64104900 | -1.95868200 | -0.16466600 |
| H | -6.08590800 | -0.91004000 | -0.09417300 |
| H | -4.96919000 | -0.78792100 | -1.48333100 |
| N | 1.10721500  | 0.98309200  | -0.19921200 |
